# Supplementary material for: Integrative Analysis of Genetic, Proteomic, and Transcriptomic Data Reveals Novel Therapeutic Targets for Rheumatoid Arthritis
Source: Research Square preprint supplement (doi:10.21203/rs.3.rs-5510112/v1), 2025-03-14
Supplement: Supplementary file 1 [file 3e66029cbf4bcaac81460154.xlsx]

## Sheet: Catalog
Tables	Title
S1	Results of Mendelian randomization analysis on plasma protein and rheumatoid arthritis
S2	Mendelian randomization analysis results of plasma protein and serum positive rheumatoid arthritis
S3	Mendelian randomization analysis results of plasma protein and serum negative rheumatoid arthritis
S4	Results of Mendelian randomization analysis on plasma protein and juvenile rheumatoid arthritis
S5	Analysis results of plasma protein and single gene SMR in rheumatoid arthritis
S6	Single gene SMR analysis results of plasma protein and serum positive rheumatoid arthritis
S7	Single gene SMR analysis results of plasma protein and serum negative rheumatoid arthritis
S8	Results of Single Gene SMR Analysis of Plasma Protein and Juvenile Rheumatoid Arthritis
S9	Bayesian co localization analysis results of plasma proteins and MR positive proteins in rheumatoid arthritis
S10	Bayesian co localization analysis results of plasma protein and serum positive rheumatoid arthritis MR positive protein
S11	Bayesian co localization analysis results of plasma protein and serum negative rheumatoid arthritis MR positive protein
S12	Bayesian co localization analysis results of plasma proteins and MR positive proteins in juvenile rheumatoid arthritis
S13	Significant positive gene LDSC analysis results
S14	Results of full phenotype association analysis of significantly positive genes
S15	Protein protein interaction analysis results
S16	Gene Ontology (GO) Enrichment Analysis Results
S17	Kyoto Encyclopedia of Genes and Genomes (KEGG) Enrichment Analysis Results
S18	Drug Gene Set Database (DSigDB) for Single Gene Prediction of Drug Results
S19	Drug Gene Set Database (DSigDB) for predicting drug outcomes in diseases
S20	Molecular docking results

## Sheet: S1
Table S1. Results of Mendelian randomization analysis on plasma proteins and rheumatoid arthritis
id.exposure	id.outcome	outcome	exposure	method	nsnp	b	se	pval	lo_ci	up_ci	or	or_lci95	or_uci95	p_fdr
KCNAB2	finngen_R11_M13_RHEUMA	Rheumatoid arthritis || id:finngen_R11_M13_RHEUMA	KCNAB2++KCAB2_NA_KCAB2	Wald ratio	1	0.0450395	0.187848	0.810511	-0.323142	0.413221	1.04607	0.723871	1.51168	0.944479
SIGLEC12	finngen_R11_M13_RHEUMA	Rheumatoid arthritis || id:finngen_R11_M13_RHEUMA	SIGLEC12++SIG12_NA_SIG12	Inverse variance weighted	8	0.0171221	0.0254839	0.50166	-0.0328263	0.0670705	1.01727	0.967707	1.06937	0.990373
SIGLEC12	finngen_R11_M13_RHEUMA	Rheumatoid arthritis || id:finngen_R11_M13_RHEUMA	SIGLEC12++SIG12_NA_SIG12	MR Egger	8	0.0400115	0.0429315	0.38731	-0.0441342	0.124157	1.04082	0.956826	1.13219	0.999671
SIGLEC12	finngen_R11_M13_RHEUMA	Rheumatoid arthritis || id:finngen_R11_M13_RHEUMA	SIGLEC12++SIG12_NA_SIG12	Weighted median	8	0.0334581	0.0297809	0.261236	-0.0249124	0.0918285	1.03402	0.975395	1.09618	0.866995
SIGLEC12	finngen_R11_M13_RHEUMA	Rheumatoid arthritis || id:finngen_R11_M13_RHEUMA	SIGLEC12++SIG12_NA_SIG12	Weighted mode	8	0.0240021	0.0299058	0.4486	-0.0346133	0.0826175	1.02429	0.965979	1.08613	0.976532
SIGLEC12	finngen_R11_M13_RHEUMA	Rheumatoid arthritis || id:finngen_R11_M13_RHEUMA	SIGLEC12++SIG12_NA_SIG12	Maximum likelihood	8	0.0171346	0.0254985	0.501593	-0.0328425	0.0671117	1.01728	0.967691	1.06941	0.9072
SIGLEC12	finngen_R11_M13_RHEUMA	Rheumatoid arthritis || id:finngen_R11_M13_RHEUMA	SIGLEC12++SIG12_NA_SIG12	Simple mode	8	0.0135816	0.0417096	0.754227	-0.0681692	0.0953325	1.01367	0.934102	1.10002	0.994896
SGK3	finngen_R11_M13_RHEUMA	Rheumatoid arthritis || id:finngen_R11_M13_RHEUMA	SGK3++SGK3_NA_SGK3	Wald ratio	1	-0.510601	0.581622	0.380003	-1.65058	0.629379	0.600135	0.191939	1.87644	0.783932
PLCG2	finngen_R11_M13_RHEUMA	Rheumatoid arthritis || id:finngen_R11_M13_RHEUMA	PLCG2++PLCG2_NA_PLCG2	Inverse variance weighted	2	-0.0730548	0.0974501	0.453457	-0.264057	0.117947	0.92955	0.76793	1.12518	0.990373
PLCG2	finngen_R11_M13_RHEUMA	Rheumatoid arthritis || id:finngen_R11_M13_RHEUMA	PLCG2++PLCG2_NA_PLCG2	Maximum likelihood	2	-0.073056	0.0975886	0.454091	-0.26433	0.118218	0.929549	0.76772	1.12549	0.895805
EIF2B1	finngen_R11_M13_RHEUMA	Rheumatoid arthritis || id:finngen_R11_M13_RHEUMA	EIF2B1++EI2BA_NA_EI2BA	Wald ratio	1	0.0548167	0.327136	0.866925	-0.58637	0.696003	1.05635	0.556343	2.00572	0.948945
ENO2	finngen_R11_M13_RHEUMA	Rheumatoid arthritis || id:finngen_R11_M13_RHEUMA	ENO2++NSE_NA_NSE	Wald ratio	1	0.132816	0.0959873	0.166457	-0.0553195	0.320951	1.14204	0.946183	1.37844	0.648366
STAT3	finngen_R11_M13_RHEUMA	Rheumatoid arthritis || id:finngen_R11_M13_RHEUMA	STAT3++STAT3_NA_STAT3	Wald ratio	1	-0.0327133	0.0816476	0.688667	-0.192743	0.127316	0.967816	0.824694	1.13578	0.921545
MCL1	finngen_R11_M13_RHEUMA	Rheumatoid arthritis || id:finngen_R11_M13_RHEUMA	MCL1++Mcl_1	Wald ratio	1	-0.0872321	0.0813447	0.283551	-0.246668	0.0722035	0.916464	0.7814	1.07487	0.747378
NPDC1	finngen_R11_M13_RHEUMA	Rheumatoid arthritis || id:finngen_R11_M13_RHEUMA	NPDC1++NPDC1_NA_NPDC1	Wald ratio	1	-0.020907	0.22359	0.925502	-0.459144	0.41733	0.97931	0.631824	1.5179	0.974488
CLMP	finngen_R11_M13_RHEUMA	Rheumatoid arthritis || id:finngen_R11_M13_RHEUMA	CLMP++ACAM_NA_ACAM	Inverse variance weighted	2	0.0977948	0.0780347	0.210125	-0.0551532	0.250743	1.10274	0.94634	1.28498	0.927309
CLMP	finngen_R11_M13_RHEUMA	Rheumatoid arthritis || id:finngen_R11_M13_RHEUMA	CLMP++ACAM_NA_ACAM	Maximum likelihood	2	0.0980298	0.0589573	0.0963676	-0.0175266	0.213586	1.103	0.982626	1.23811	0.599239
TMEM190	finngen_R11_M13_RHEUMA	Rheumatoid arthritis || id:finngen_R11_M13_RHEUMA	TMEM190++TM190_NA_TM190	Inverse variance weighted	9	-0.0349058	0.0277044	0.207692	-0.0892063	0.0193948	0.965696	0.914657	1.01958	0.927309
TMEM190	finngen_R11_M13_RHEUMA	Rheumatoid arthritis || id:finngen_R11_M13_RHEUMA	TMEM190++TM190_NA_TM190	MR Egger	9	-0.120108	0.0741405	0.149263	-0.265423	0.0252075	0.886825	0.766881	1.02553	0.999671
TMEM190	finngen_R11_M13_RHEUMA	Rheumatoid arthritis || id:finngen_R11_M13_RHEUMA	TMEM190++TM190_NA_TM190	Weighted median	9	-0.0705372	0.0311486	0.0235409	-0.131588	-0.009486	0.931893	0.876702	0.990559	0.412924
TMEM190	finngen_R11_M13_RHEUMA	Rheumatoid arthritis || id:finngen_R11_M13_RHEUMA	TMEM190++TM190_NA_TM190	Weighted mode	9	-0.0842417	0.0294045	0.0209919	-0.141875	-0.0266089	0.919209	0.86773	0.973742	0.976532
TMEM190	finngen_R11_M13_RHEUMA	Rheumatoid arthritis || id:finngen_R11_M13_RHEUMA	TMEM190++TM190_NA_TM190	Maximum likelihood	9	-0.0349743	0.0206895	0.0909447	-0.0755258	0.00557716	0.96563	0.927256	1.00559	0.599165
TMEM190	finngen_R11_M13_RHEUMA	Rheumatoid arthritis || id:finngen_R11_M13_RHEUMA	TMEM190++TM190_NA_TM190	Simple mode	9	-0.0769629	0.0710624	0.310354	-0.216245	0.0623195	0.925924	0.805538	1.0643	0.994896
NUCB1	finngen_R11_M13_RHEUMA	Rheumatoid arthritis || id:finngen_R11_M13_RHEUMA	NUCB1++NUCB1_NA_NUCB1	Inverse variance weighted	2	0.168685	0.283509	0.55185	-0.386993	0.724364	1.18375	0.679096	2.06342	0.990373
NUCB1	finngen_R11_M13_RHEUMA	Rheumatoid arthritis || id:finngen_R11_M13_RHEUMA	NUCB1++NUCB1_NA_NUCB1	Maximum likelihood	2	0.174184	0.0951574	0.0671781	-0.0123247	0.360692	1.19027	0.987751	1.43432	0.533461
INSL5	finngen_R11_M13_RHEUMA	Rheumatoid arthritis || id:finngen_R11_M13_RHEUMA	INSL5++INSL5_NA_INSL5	Wald ratio	1	-0.4928	0.220974	0.0257391	-0.925908	-0.0596909	0.610914	0.396171	0.942056	0.292585
ANTXR1	finngen_R11_M13_RHEUMA	Rheumatoid arthritis || id:finngen_R11_M13_RHEUMA	ANTXR1++ANTR1_NA_ANTR1	Wald ratio	1	0.0980118	0.266021	0.712548	-0.42339	0.619413	1.10298	0.654824	1.85784	0.930618
RPN1	finngen_R11_M13_RHEUMA	Rheumatoid arthritis || id:finngen_R11_M13_RHEUMA	RPN1++RPN1_NA_RPN1	Wald ratio	1	-0.0855472	0.0836988	0.306741	-0.249597	0.0785024	0.91801	0.779115	1.08167	0.753386
TMEM106A	finngen_R11_M13_RHEUMA	Rheumatoid arthritis || id:finngen_R11_M13_RHEUMA	TMEM106A++T106A_NA_T106A	Wald ratio	1	0.143935	0.214598	0.502401	-0.276678	0.564547	1.15481	0.758299	1.75865	0.853181
COL6A3	finngen_R11_M13_RHEUMA	Rheumatoid arthritis || id:finngen_R11_M13_RHEUMA	COL6A3++Collagen_alpha_3_VI	Inverse variance weighted	2	-0.0615308	0.118999	0.605107	-0.294769	0.171707	0.940324	0.744704	1.18733	0.990373
COL6A3	finngen_R11_M13_RHEUMA	Rheumatoid arthritis || id:finngen_R11_M13_RHEUMA	COL6A3++Collagen_alpha_3_VI	Maximum likelihood	2	-0.0615981	0.111409	0.580332	-0.27996	0.156764	0.940261	0.755814	1.16972	0.925963
PTGDS	finngen_R11_M13_RHEUMA	Rheumatoid arthritis || id:finngen_R11_M13_RHEUMA	PTGDS++PGD2_synthase	Wald ratio	1	-0.0896504	0.0882064	0.309453	-0.262535	0.0832342	0.914251	0.7691	1.0868	0.755988
PARP1	finngen_R11_M13_RHEUMA	Rheumatoid arthritis || id:finngen_R11_M13_RHEUMA	PARP1++PARP_NA_PARP	Wald ratio	1	0.125097	0.228741	0.584451	-0.323235	0.57343	1.13326	0.723803	1.77434	0.885657
GLB1	finngen_R11_M13_RHEUMA	Rheumatoid arthritis || id:finngen_R11_M13_RHEUMA	GLB1++BGAL_NA_BGAL	Wald ratio	1	-0.252548	0.280763	0.368383	-0.802843	0.297747	0.776819	0.448053	1.34682	0.777232
PGLYRP3	finngen_R11_M13_RHEUMA	Rheumatoid arthritis || id:finngen_R11_M13_RHEUMA	PGLYRP3++PGRP_I_alpha	Wald ratio	1	0.457979	0.184073	0.0128452	0.0971963	0.818762	1.58088	1.10208	2.26769	0.210117
MGAT1	finngen_R11_M13_RHEUMA	Rheumatoid arthritis || id:finngen_R11_M13_RHEUMA	MGAT1++MGAT1_NA_MGAT1	Wald ratio	1	0.115917	0.24708	0.638964	-0.368359	0.600193	1.1229	0.691869	1.82247	0.901574
HTN3	finngen_R11_M13_RHEUMA	Rheumatoid arthritis || id:finngen_R11_M13_RHEUMA	HTN3++HIS3_NA_HIS3	Inverse variance weighted (multiplicative random effects)	3	-0.0956311	0.189621	0.614031	-0.467288	0.276026	0.908799	0.626699	1.31788	0.990373
HTN3	finngen_R11_M13_RHEUMA	Rheumatoid arthritis || id:finngen_R11_M13_RHEUMA	HTN3++HIS3_NA_HIS3	MR Egger	3	-0.232711	0.500174	0.722771	-1.21305	0.747631	0.792383	0.297289	2.11199	0.999671
HTN3	finngen_R11_M13_RHEUMA	Rheumatoid arthritis || id:finngen_R11_M13_RHEUMA	HTN3++HIS3_NA_HIS3	Weighted median	3	-0.168955	0.102584	0.0995585	-0.370019	0.0321089	0.844547	0.690721	1.03263	0.695711
HTN3	finngen_R11_M13_RHEUMA	Rheumatoid arthritis || id:finngen_R11_M13_RHEUMA	HTN3++HIS3_NA_HIS3	Weighted mode	3	-0.205997	0.110782	0.204045	-0.423129	0.0111348	0.813836	0.654994	1.0112	0.976532
HTN3	finngen_R11_M13_RHEUMA	Rheumatoid arthritis || id:finngen_R11_M13_RHEUMA	HTN3++HIS3_NA_HIS3	Maximum likelihood	3	-0.0985371	0.095888	0.304125	-0.286478	0.0894034	0.906162	0.750904	1.09352	0.834962
HTN3	finngen_R11_M13_RHEUMA	Rheumatoid arthritis || id:finngen_R11_M13_RHEUMA	HTN3++HIS3_NA_HIS3	Simple mode	3	-0.210934	0.166406	0.332551	-0.53709	0.115222	0.809827	0.584446	1.12212	0.994896
APMAP	finngen_R11_M13_RHEUMA	Rheumatoid arthritis || id:finngen_R11_M13_RHEUMA	APMAP++APMAP_NA_APMAP	Inverse variance weighted	2	-0.0257108	0.12678	0.839292	-0.274199	0.222778	0.974617	0.760181	1.24954	0.992378
APMAP	finngen_R11_M13_RHEUMA	Rheumatoid arthritis || id:finngen_R11_M13_RHEUMA	APMAP++APMAP_NA_APMAP	Maximum likelihood	2	-0.0257134	0.126805	0.839307	-0.274251	0.222824	0.974614	0.760142	1.2496	0.975865
PLOD3	finngen_R11_M13_RHEUMA	Rheumatoid arthritis || id:finngen_R11_M13_RHEUMA	PLOD3++PLOD3_NA_PLOD3	Inverse variance weighted	4	-0.0927233	0.102879	0.367436	-0.294366	0.108919	0.911446	0.745004	1.11507	0.990373
PLOD3	finngen_R11_M13_RHEUMA	Rheumatoid arthritis || id:finngen_R11_M13_RHEUMA	PLOD3++PLOD3_NA_PLOD3	MR Egger	4	-0.117604	0.184888	0.589803	-0.479985	0.244776	0.889048	0.618793	1.27734	0.999671
PLOD3	finngen_R11_M13_RHEUMA	Rheumatoid arthritis || id:finngen_R11_M13_RHEUMA	PLOD3++PLOD3_NA_PLOD3	Weighted median	4	-0.0803782	0.112504	0.474952	-0.300887	0.140131	0.922767	0.740161	1.15042	0.907615
PLOD3	finngen_R11_M13_RHEUMA	Rheumatoid arthritis || id:finngen_R11_M13_RHEUMA	PLOD3++PLOD3_NA_PLOD3	Weighted mode	4	-0.0773502	0.121873	0.570731	-0.316221	0.16152	0.925566	0.728898	1.1753	0.976532
PLOD3	finngen_R11_M13_RHEUMA	Rheumatoid arthritis || id:finngen_R11_M13_RHEUMA	PLOD3++PLOD3_NA_PLOD3	Maximum likelihood	4	-0.0929237	0.103208	0.367932	-0.295212	0.109364	0.911263	0.744374	1.11557	0.882244
PLOD3	finngen_R11_M13_RHEUMA	Rheumatoid arthritis || id:finngen_R11_M13_RHEUMA	PLOD3++PLOD3_NA_PLOD3	Simple mode	4	-0.0270386	0.177557	0.88863	-0.37505	0.320973	0.973324	0.687255	1.37847	0.994896
APLP2	finngen_R11_M13_RHEUMA	Rheumatoid arthritis || id:finngen_R11_M13_RHEUMA	APLP2++APLP2_NA_APLP2	Inverse variance weighted	2	-0.103871	0.287213	0.717611	-0.666808	0.459066	0.901341	0.513344	1.58259	0.990373
APLP2	finngen_R11_M13_RHEUMA	Rheumatoid arthritis || id:finngen_R11_M13_RHEUMA	APLP2++APLP2_NA_APLP2	Maximum likelihood	2	-0.107517	0.101407	0.289029	-0.306274	0.0912401	0.898061	0.736185	1.09553	0.830031
GNRH2	finngen_R11_M13_RHEUMA	Rheumatoid arthritis || id:finngen_R11_M13_RHEUMA	GNRH2++GON2_NA_GON2	Inverse variance weighted	2	-0.0862029	0.130119	0.507656	-0.341237	0.168831	0.917408	0.71089	1.18392	0.990373
GNRH2	finngen_R11_M13_RHEUMA	Rheumatoid arthritis || id:finngen_R11_M13_RHEUMA	GNRH2++GON2_NA_GON2	Maximum likelihood	2	-0.0868162	0.0728579	0.233425	-0.229618	0.0559854	0.916846	0.794837	1.05758	0.7864
SYK	finngen_R11_M13_RHEUMA	Rheumatoid arthritis || id:finngen_R11_M13_RHEUMA	SYK++KSYK_NA_KSYK	Wald ratio	1	0.0557643	0.164695	0.734918	-0.267038	0.378567	1.05735	0.765644	1.46019	0.935106
SERPINB1	finngen_R11_M13_RHEUMA	Rheumatoid arthritis || id:finngen_R11_M13_RHEUMA	SERPINB1++Serpin_B1	Wald ratio	1	-0.467056	0.155326	0.0026389	-0.771494	-0.162617	0.626845	0.462322	0.849917	0.113803
PROK2	finngen_R11_M13_RHEUMA	Rheumatoid arthritis || id:finngen_R11_M13_RHEUMA	PROK2++Prokineticin_2	Inverse variance weighted	5	-0.0734996	0.027483	0.00748706	-0.127366	-0.0196329	0.929136	0.880411	0.980559	0.31646
PROK2	finngen_R11_M13_RHEUMA	Rheumatoid arthritis || id:finngen_R11_M13_RHEUMA	PROK2++Prokineticin_2	MR Egger	5	-0.0358516	0.0435412	0.470637	-0.121192	0.0494891	0.964783	0.885864	1.05073	0.999671
PROK2	finngen_R11_M13_RHEUMA	Rheumatoid arthritis || id:finngen_R11_M13_RHEUMA	PROK2++Prokineticin_2	Weighted median	5	-0.0570492	0.0302479	0.0592875	-0.116335	0.00223666	0.944548	0.890177	1.00224	0.577341
PROK2	finngen_R11_M13_RHEUMA	Rheumatoid arthritis || id:finngen_R11_M13_RHEUMA	PROK2++Prokineticin_2	Weighted mode	5	-0.0551966	0.0316899	0.156513	-0.117309	0.00691559	0.946299	0.889311	1.00694	0.976532
PROK2	finngen_R11_M13_RHEUMA	Rheumatoid arthritis || id:finngen_R11_M13_RHEUMA	PROK2++Prokineticin_2	Maximum likelihood	5	-0.0735815	0.0274844	0.00742375	-0.127451	-0.0197121	0.92906	0.880337	0.980481	0.222497
PROK2	finngen_R11_M13_RHEUMA	Rheumatoid arthritis || id:finngen_R11_M13_RHEUMA	PROK2++Prokineticin_2	Simple mode	5	-0.0639792	0.0710459	0.418753	-0.203229	0.0752708	0.938024	0.816091	1.07818	0.994896
CSGALNACT2	finngen_R11_M13_RHEUMA	Rheumatoid arthritis || id:finngen_R11_M13_RHEUMA	CSGALNACT2++CGAT2_NA_CGAT2	Wald ratio	1	0.222307	0.116141	0.0556064	-0.00532997	0.449943	1.24895	0.994684	1.56822	0.44888
SERPINH1	finngen_R11_M13_RHEUMA	Rheumatoid arthritis || id:finngen_R11_M13_RHEUMA	SERPINH1++Collagen_binding_protein	Inverse variance weighted	2	-0.0414652	0.0920246	0.652287	-0.221833	0.138903	0.959383	0.801049	1.14901	0.990373
SERPINH1	finngen_R11_M13_RHEUMA	Rheumatoid arthritis || id:finngen_R11_M13_RHEUMA	SERPINH1++Collagen_binding_protein	Maximum likelihood	2	-0.0415743	0.0921993	0.652049	-0.222285	0.139136	0.959278	0.800687	1.14928	0.93286
KLRB1	finngen_R11_M13_RHEUMA	Rheumatoid arthritis || id:finngen_R11_M13_RHEUMA	KLRB1++KLRB1_NA_KLRB1	Inverse variance weighted	2	0.0556598	0.28793	0.846716	-0.508684	0.620003	1.05724	0.601287	1.85893	0.992378
KLRB1	finngen_R11_M13_RHEUMA	Rheumatoid arthritis || id:finngen_R11_M13_RHEUMA	KLRB1++KLRB1_NA_KLRB1	Maximum likelihood	2	0.0556632	0.288014	0.846751	-0.508845	0.620171	1.05724	0.60119	1.85925	0.975865
HABP4	finngen_R11_M13_RHEUMA	Rheumatoid arthritis || id:finngen_R11_M13_RHEUMA	HABP4++HABP4_NA_HABP4	Inverse variance weighted	2	0.0440442	0.109065	0.686333	-0.169723	0.257811	1.04503	0.843899	1.29409	0.990373
HABP4	finngen_R11_M13_RHEUMA	Rheumatoid arthritis || id:finngen_R11_M13_RHEUMA	HABP4++HABP4_NA_HABP4	Maximum likelihood	2	0.044046	0.10912	0.686471	-0.169828	0.25792	1.04503	0.84381	1.29424	0.936817
PILRA	finngen_R11_M13_RHEUMA	Rheumatoid arthritis || id:finngen_R11_M13_RHEUMA	PILRA++PILRA_isoform_FDF03_M14	Inverse variance weighted	7	-0.0869562	0.0328885	0.00819406	-0.151418	-0.0224947	0.916717	0.859489	0.977756	0.31646
PILRA	finngen_R11_M13_RHEUMA	Rheumatoid arthritis || id:finngen_R11_M13_RHEUMA	PILRA++PILRA_isoform_FDF03_M14	MR Egger	7	-0.18199	0.103112	0.137838	-0.38409	0.0201098	0.833609	0.68107	1.02031	0.999671
PILRA	finngen_R11_M13_RHEUMA	Rheumatoid arthritis || id:finngen_R11_M13_RHEUMA	PILRA++PILRA_isoform_FDF03_M14	Weighted median	7	-0.0717048	0.0394582	0.069181	-0.149043	0.0056332	0.930806	0.861532	1.00565	0.605312
PILRA	finngen_R11_M13_RHEUMA	Rheumatoid arthritis || id:finngen_R11_M13_RHEUMA	PILRA++PILRA_isoform_FDF03_M14	Weighted mode	7	-0.0599478	0.0433549	0.216011	-0.144923	0.0250277	0.941814	0.865089	1.02534	0.976532
PILRA	finngen_R11_M13_RHEUMA	Rheumatoid arthritis || id:finngen_R11_M13_RHEUMA	PILRA++PILRA_isoform_FDF03_M14	Maximum likelihood	7	-0.087016	0.0329353	0.00824116	-0.151569	-0.0224628	0.916662	0.859358	0.977788	0.230752
PILRA	finngen_R11_M13_RHEUMA	Rheumatoid arthritis || id:finngen_R11_M13_RHEUMA	PILRA++PILRA_isoform_FDF03_M14	Simple mode	7	-0.072035	0.0642204	0.304871	-0.197907	0.0538371	0.930498	0.820446	1.05531	0.994896
SMPD1	finngen_R11_M13_RHEUMA	Rheumatoid arthritis || id:finngen_R11_M13_RHEUMA	SMPD1++ASM_NA_ASM	Inverse variance weighted	5	-0.0643675	0.0357109	0.0714727	-0.134361	0.00562582	0.93766	0.874274	1.00564	0.714727
SMPD1	finngen_R11_M13_RHEUMA	Rheumatoid arthritis || id:finngen_R11_M13_RHEUMA	SMPD1++ASM_NA_ASM	MR Egger	5	-0.113714	0.0735422	0.219772	-0.257857	0.0304284	0.892513	0.772706	1.0309	0.999671
SMPD1	finngen_R11_M13_RHEUMA	Rheumatoid arthritis || id:finngen_R11_M13_RHEUMA	SMPD1++ASM_NA_ASM	Weighted median	5	-0.066848	0.0379696	0.0783116	-0.141268	0.00757237	0.935337	0.868256	1.0076	0.625733
SMPD1	finngen_R11_M13_RHEUMA	Rheumatoid arthritis || id:finngen_R11_M13_RHEUMA	SMPD1++ASM_NA_ASM	Weighted mode	5	-0.0713946	0.0386954	0.138785	-0.147237	0.0044483	0.931094	0.863089	1.00446	0.976532
SMPD1	finngen_R11_M13_RHEUMA	Rheumatoid arthritis || id:finngen_R11_M13_RHEUMA	SMPD1++ASM_NA_ASM	Maximum likelihood	5	-0.0644147	0.0357424	0.0715148	-0.13447	0.00564035	0.937616	0.874179	1.00566	0.533461
SMPD1	finngen_R11_M13_RHEUMA	Rheumatoid arthritis || id:finngen_R11_M13_RHEUMA	SMPD1++ASM_NA_ASM	Simple mode	5	-0.0782645	0.0706672	0.330187	-0.216772	0.0602432	0.92472	0.805113	1.06209	0.994896
B4GALT6	finngen_R11_M13_RHEUMA	Rheumatoid arthritis || id:finngen_R11_M13_RHEUMA	B4GALT6++B4GT6_NA_B4GT6	Inverse variance weighted	3	-0.0204156	0.0336901	0.544526	-0.0864482	0.0456169	0.979791	0.917183	1.04667	0.990373
B4GALT6	finngen_R11_M13_RHEUMA	Rheumatoid arthritis || id:finngen_R11_M13_RHEUMA	B4GALT6++B4GT6_NA_B4GT6	MR Egger	3	-0.00418198	0.0412568	0.935689	-0.0850453	0.0766813	0.995827	0.918471	1.0797	0.999671
B4GALT6	finngen_R11_M13_RHEUMA	Rheumatoid arthritis || id:finngen_R11_M13_RHEUMA	B4GALT6++B4GT6_NA_B4GT6	Weighted median	3	-0.0178277	0.0348918	0.60939	-0.0862156	0.0505601	0.98233	0.917396	1.05186	0.967763
B4GALT6	finngen_R11_M13_RHEUMA	Rheumatoid arthritis || id:finngen_R11_M13_RHEUMA	B4GALT6++B4GT6_NA_B4GT6	Weighted mode	3	-0.0189955	0.0372995	0.66119	-0.0921024	0.0541114	0.981184	0.912012	1.0556	0.9821
B4GALT6	finngen_R11_M13_RHEUMA	Rheumatoid arthritis || id:finngen_R11_M13_RHEUMA	B4GALT6++B4GT6_NA_B4GT6	Maximum likelihood	3	-0.020435	0.033713	0.544418	-0.0865125	0.0456425	0.979772	0.917124	1.0467	0.92239
B4GALT6	finngen_R11_M13_RHEUMA	Rheumatoid arthritis || id:finngen_R11_M13_RHEUMA	B4GALT6++B4GT6_NA_B4GT6	Simple mode	3	-0.0116656	0.0477414	0.829742	-0.105239	0.0819076	0.988402	0.90011	1.08536	0.994896
HHIP	finngen_R11_M13_RHEUMA	Rheumatoid arthritis || id:finngen_R11_M13_RHEUMA	HHIP++HHIP_NA_HHIP	Inverse variance weighted	2	0.102827	0.085918	0.231383	-0.0655724	0.271226	1.1083	0.936531	1.31157	0.944804
HHIP	finngen_R11_M13_RHEUMA	Rheumatoid arthritis || id:finngen_R11_M13_RHEUMA	HHIP++HHIP_NA_HHIP	Maximum likelihood	2	0.103085	0.086226	0.231882	-0.0659176	0.272088	1.10859	0.936208	1.3127	0.7864
A4GNT	finngen_R11_M13_RHEUMA	Rheumatoid arthritis || id:finngen_R11_M13_RHEUMA	A4GNT++A4GCT_NA_A4GCT	Wald ratio	1	0.500889	0.196736	0.0108965	0.115287	0.886492	1.65019	1.1222	2.4266	0.202312
EBI3	finngen_R11_M13_RHEUMA	Rheumatoid arthritis || id:finngen_R11_M13_RHEUMA	EBI3++IL27B_NA_IL27B	Inverse variance weighted	8	0.042883	0.0300557	0.153642	-0.0160262	0.101792	1.04382	0.984102	1.10715	0.87959
EBI3	finngen_R11_M13_RHEUMA	Rheumatoid arthritis || id:finngen_R11_M13_RHEUMA	EBI3++IL27B_NA_IL27B	MR Egger	8	0.0464513	0.0600918	0.468867	-0.0713287	0.164231	1.04755	0.931156	1.17849	0.999671
EBI3	finngen_R11_M13_RHEUMA	Rheumatoid arthritis || id:finngen_R11_M13_RHEUMA	EBI3++IL27B_NA_IL27B	Weighted median	8	0.0385669	0.0272952	0.15767	-0.0149318	0.0920655	1.03932	0.985179	1.09644	0.814013
EBI3	finngen_R11_M13_RHEUMA	Rheumatoid arthritis || id:finngen_R11_M13_RHEUMA	EBI3++IL27B_NA_IL27B	Weighted mode	8	0.0380334	0.025493	0.179351	-0.011933	0.0879998	1.03877	0.988138	1.09199	0.976532
EBI3	finngen_R11_M13_RHEUMA	Rheumatoid arthritis || id:finngen_R11_M13_RHEUMA	EBI3++IL27B_NA_IL27B	Maximum likelihood	8	0.0429969	0.0221962	0.0527294	-0.000507615	0.0865014	1.04393	0.999493	1.09035	0.510732
EBI3	finngen_R11_M13_RHEUMA	Rheumatoid arthritis || id:finngen_R11_M13_RHEUMA	EBI3++IL27B_NA_IL27B	Simple mode	8	0.0380334	0.0418811	0.393999	-0.0440535	0.12012	1.03877	0.956903	1.12763	0.994896
OSMR	finngen_R11_M13_RHEUMA	Rheumatoid arthritis || id:finngen_R11_M13_RHEUMA	OSMR++OSMR_NA_OSMR	Wald ratio	1	0.175072	0.110647	0.113592	-0.0417967	0.39194	1.19133	0.959065	1.47985	0.56315
STX8	finngen_R11_M13_RHEUMA	Rheumatoid arthritis || id:finngen_R11_M13_RHEUMA	STX8++STX8_NA_STX8	Wald ratio	1	0.152164	0.21849	0.486156	-0.276077	0.580406	1.16435	0.758755	1.78676	0.853181
NTM	finngen_R11_M13_RHEUMA	Rheumatoid arthritis || id:finngen_R11_M13_RHEUMA	NTM++NTRI_NA_NTRI	Inverse variance weighted	6	-0.0406996	0.0302647	0.178694	-0.100019	0.0186193	0.960117	0.904821	1.01879	0.909715
NTM	finngen_R11_M13_RHEUMA	Rheumatoid arthritis || id:finngen_R11_M13_RHEUMA	NTM++NTRI_NA_NTRI	MR Egger	6	-0.070357	0.0693533	0.367732	-0.206289	0.0655754	0.932061	0.813598	1.06777	0.999671
NTM	finngen_R11_M13_RHEUMA	Rheumatoid arthritis || id:finngen_R11_M13_RHEUMA	NTM++NTRI_NA_NTRI	Weighted median	6	-0.0534563	0.0317467	0.0922128	-0.11568	0.0087672	0.947947	0.89076	1.00881	0.674722
NTM	finngen_R11_M13_RHEUMA	Rheumatoid arthritis || id:finngen_R11_M13_RHEUMA	NTM++NTRI_NA_NTRI	Weighted mode	6	-0.0535511	0.0318589	0.153617	-0.115995	0.00889244	0.947858	0.89048	1.00893	0.976532
NTM	finngen_R11_M13_RHEUMA	Rheumatoid arthritis || id:finngen_R11_M13_RHEUMA	NTM++NTRI_NA_NTRI	Maximum likelihood	6	-0.0407717	0.0284478	0.151798	-0.0965294	0.0149861	0.960048	0.907983	1.0151	0.69021
NTM	finngen_R11_M13_RHEUMA	Rheumatoid arthritis || id:finngen_R11_M13_RHEUMA	NTM++NTRI_NA_NTRI	Simple mode	6	-0.0442228	0.0551866	0.45931	-0.152389	0.063943	0.956741	0.858655	1.06603	0.994896
GALNT13	finngen_R11_M13_RHEUMA	Rheumatoid arthritis || id:finngen_R11_M13_RHEUMA	GALNT13++GLT13_NA_GLT13	Wald ratio	1	0.133476	0.274096	0.62628	-0.403751	0.670704	1.14279	0.66781	1.95561	0.892288
PLA2R1	finngen_R11_M13_RHEUMA	Rheumatoid arthritis || id:finngen_R11_M13_RHEUMA	PLA2R1++PLA2R_NA_PLA2R	Inverse variance weighted	12	-0.0387034	0.021289	0.0690637	-0.0804299	0.00302297	0.962036	0.92272	1.00303	0.714727
PLA2R1	finngen_R11_M13_RHEUMA	Rheumatoid arthritis || id:finngen_R11_M13_RHEUMA	PLA2R1++PLA2R_NA_PLA2R	MR Egger	12	-0.143537	0.0993051	0.178942	-0.338175	0.0511013	0.866289	0.713071	1.05243	0.999671
PLA2R1	finngen_R11_M13_RHEUMA	Rheumatoid arthritis || id:finngen_R11_M13_RHEUMA	PLA2R1++PLA2R_NA_PLA2R	Weighted median	12	-0.00683495	0.0275853	0.804309	-0.0609022	0.0472323	0.993188	0.940915	1.04837	0.982685
PLA2R1	finngen_R11_M13_RHEUMA	Rheumatoid arthritis || id:finngen_R11_M13_RHEUMA	PLA2R1++PLA2R_NA_PLA2R	Weighted mode	12	-0.0139005	0.0265542	0.611026	-0.0659467	0.0381457	0.986196	0.936181	1.03888	0.980099
PLA2R1	finngen_R11_M13_RHEUMA	Rheumatoid arthritis || id:finngen_R11_M13_RHEUMA	PLA2R1++PLA2R_NA_PLA2R	Maximum likelihood	12	-0.0386437	0.0211409	0.0675627	-0.0800799	0.00279245	0.962093	0.923043	1.0028	0.533461
PLA2R1	finngen_R11_M13_RHEUMA	Rheumatoid arthritis || id:finngen_R11_M13_RHEUMA	PLA2R1++PLA2R_NA_PLA2R	Simple mode	12	-0.0479591	0.051335	0.370237	-0.148576	0.0526576	0.953173	0.861935	1.05407	0.994896
CYB5D2	finngen_R11_M13_RHEUMA	Rheumatoid arthritis || id:finngen_R11_M13_RHEUMA	CYB5D2++NEUFC_NA_NEUFC	Inverse variance weighted	2	0.0230178	0.0539725	0.669764	-0.0827684	0.128804	1.02328	0.920564	1.13747	0.990373
CYB5D2	finngen_R11_M13_RHEUMA	Rheumatoid arthritis || id:finngen_R11_M13_RHEUMA	CYB5D2++NEUFC_NA_NEUFC	Maximum likelihood	2	0.0230227	0.0539833	0.669759	-0.0827845	0.12883	1.02329	0.920549	1.1375	0.93286
PLD3	finngen_R11_M13_RHEUMA	Rheumatoid arthritis || id:finngen_R11_M13_RHEUMA	PLD3++PLD3_NA_PLD3	Wald ratio	1	-0.225488	0.288951	0.435173	-0.791831	0.340855	0.798126	0.453014	1.40615	0.830108
SPINK7	finngen_R11_M13_RHEUMA	Rheumatoid arthritis || id:finngen_R11_M13_RHEUMA	SPINK7++ISK7_NA_ISK7	Wald ratio	1	-0.0836467	0.103545	0.41919	-0.286596	0.119302	0.919756	0.750815	1.12671	0.81926
UCMA	finngen_R11_M13_RHEUMA	Rheumatoid arthritis || id:finngen_R11_M13_RHEUMA	UCMA++UCMA_NA_UCMA	Inverse variance weighted	6	-0.0391296	0.0438704	0.372428	-0.125116	0.0468565	0.961626	0.882395	1.04797	0.990373
UCMA	finngen_R11_M13_RHEUMA	Rheumatoid arthritis || id:finngen_R11_M13_RHEUMA	UCMA++UCMA_NA_UCMA	MR Egger	6	-0.00636681	0.0774376	0.938423	-0.158145	0.145411	0.993653	0.853726	1.15651	0.999671
UCMA	finngen_R11_M13_RHEUMA	Rheumatoid arthritis || id:finngen_R11_M13_RHEUMA	UCMA++UCMA_NA_UCMA	Weighted median	6	-0.029235	0.0527039	0.579098	-0.132535	0.0740647	0.971188	0.875873	1.07688	0.949718
UCMA	finngen_R11_M13_RHEUMA	Rheumatoid arthritis || id:finngen_R11_M13_RHEUMA	UCMA++UCMA_NA_UCMA	Weighted mode	6	-0.0225957	0.059954	0.721725	-0.140106	0.0949142	0.977658	0.869266	1.09956	0.983092
UCMA	finngen_R11_M13_RHEUMA	Rheumatoid arthritis || id:finngen_R11_M13_RHEUMA	UCMA++UCMA_NA_UCMA	Maximum likelihood	6	-0.0391527	0.0438767	0.372214	-0.125151	0.0468456	0.961604	0.882364	1.04796	0.882878
UCMA	finngen_R11_M13_RHEUMA	Rheumatoid arthritis || id:finngen_R11_M13_RHEUMA	UCMA++UCMA_NA_UCMA	Simple mode	6	-0.0602053	0.0671324	0.410915	-0.191785	0.0713743	0.941571	0.825484	1.07398	0.994896
SVEP1	finngen_R11_M13_RHEUMA	Rheumatoid arthritis || id:finngen_R11_M13_RHEUMA	SVEP1++SVEP1_NA_SVEP1	Inverse variance weighted	6	0.0176023	0.0296903	0.553272	-0.0405907	0.0757953	1.01776	0.960222	1.07874	0.990373
SVEP1	finngen_R11_M13_RHEUMA	Rheumatoid arthritis || id:finngen_R11_M13_RHEUMA	SVEP1++SVEP1_NA_SVEP1	MR Egger	6	0.0424327	0.0474736	0.421939	-0.0506156	0.135481	1.04335	0.950644	1.14509	0.999671
SVEP1	finngen_R11_M13_RHEUMA	Rheumatoid arthritis || id:finngen_R11_M13_RHEUMA	SVEP1++SVEP1_NA_SVEP1	Weighted median	6	0.0218867	0.0330865	0.508292	-0.0429629	0.0867363	1.02213	0.957947	1.09061	0.912537
SVEP1	finngen_R11_M13_RHEUMA	Rheumatoid arthritis || id:finngen_R11_M13_RHEUMA	SVEP1++SVEP1_NA_SVEP1	Weighted mode	6	0.0181976	0.0334363	0.609654	-0.0473377	0.0837328	1.01836	0.953765	1.08734	0.980099
SVEP1	finngen_R11_M13_RHEUMA	Rheumatoid arthritis || id:finngen_R11_M13_RHEUMA	SVEP1++SVEP1_NA_SVEP1	Maximum likelihood	6	0.0176014	0.0296985	0.553402	-0.0406076	0.0758104	1.01776	0.960206	1.07876	0.92239
SVEP1	finngen_R11_M13_RHEUMA	Rheumatoid arthritis || id:finngen_R11_M13_RHEUMA	SVEP1++SVEP1_NA_SVEP1	Simple mode	6	0.00682305	0.0436356	0.881863	-0.0787028	0.0923489	1.00685	0.924315	1.09675	0.994896
TRIO	finngen_R11_M13_RHEUMA	Rheumatoid arthritis || id:finngen_R11_M13_RHEUMA	TRIO++TRIO_NA_TRIO	Wald ratio	1	0.1553	0.283975	0.584461	-0.40129	0.711891	1.16801	0.669456	2.03784	0.885657
MTRF1L	finngen_R11_M13_RHEUMA	Rheumatoid arthritis || id:finngen_R11_M13_RHEUMA	MTRF1L++RF1ML_NA_RF1ML	Wald ratio	1	0.130084	0.0784995	0.0974921	-0.0237747	0.283943	1.13892	0.976506	1.32836	0.541774
COL1A1	finngen_R11_M13_RHEUMA	Rheumatoid arthritis || id:finngen_R11_M13_RHEUMA	COL1A1++CO1A1_NA_CO1A1	Inverse variance weighted	4	-0.0487078	0.0503845	0.333684	-0.147461	0.0500459	0.952459	0.862896	1.05132	0.988692
COL1A1	finngen_R11_M13_RHEUMA	Rheumatoid arthritis || id:finngen_R11_M13_RHEUMA	COL1A1++CO1A1_NA_CO1A1	MR Egger	4	-0.00644615	0.236086	0.980697	-0.469174	0.456282	0.993575	0.625519	1.5782	0.999671
COL1A1	finngen_R11_M13_RHEUMA	Rheumatoid arthritis || id:finngen_R11_M13_RHEUMA	COL1A1++CO1A1_NA_CO1A1	Weighted median	4	-0.0456673	0.0565759	0.419559	-0.156556	0.0652215	0.95536	0.855084	1.0674	0.893422
COL1A1	finngen_R11_M13_RHEUMA	Rheumatoid arthritis || id:finngen_R11_M13_RHEUMA	COL1A1++CO1A1_NA_CO1A1	Weighted mode	4	-0.0422546	0.0653145	0.563758	-0.170271	0.0857618	0.958626	0.843436	1.08955	0.976532
COL1A1	finngen_R11_M13_RHEUMA	Rheumatoid arthritis || id:finngen_R11_M13_RHEUMA	COL1A1++CO1A1_NA_CO1A1	Maximum likelihood	4	-0.0488517	0.0505398	0.333744	-0.14791	0.0502062	0.952322	0.862509	1.05149	0.855362
COL1A1	finngen_R11_M13_RHEUMA	Rheumatoid arthritis || id:finngen_R11_M13_RHEUMA	COL1A1++CO1A1_NA_CO1A1	Simple mode	4	-0.0393418	0.0793393	0.654039	-0.194847	0.116163	0.961422	0.822961	1.12318	0.994896
ANGPTL1	finngen_R11_M13_RHEUMA	Rheumatoid arthritis || id:finngen_R11_M13_RHEUMA	ANGPTL1++ANGL1_NA_ANGL1	Inverse variance weighted	4	-0.104906	0.0421546	0.0128242	-0.187529	-0.0222835	0.900409	0.829005	0.977963	0.404519
ANGPTL1	finngen_R11_M13_RHEUMA	Rheumatoid arthritis || id:finngen_R11_M13_RHEUMA	ANGPTL1++ANGL1_NA_ANGL1	MR Egger	4	-0.0840947	0.11695	0.546767	-0.313317	0.145128	0.919344	0.731018	1.15619	0.999671
ANGPTL1	finngen_R11_M13_RHEUMA	Rheumatoid arthritis || id:finngen_R11_M13_RHEUMA	ANGPTL1++ANGL1_NA_ANGL1	Weighted median	4	-0.129324	0.036327	0.000370848	-0.200525	-0.0581234	0.878689	0.818301	0.943534	0.091604
ANGPTL1	finngen_R11_M13_RHEUMA	Rheumatoid arthritis || id:finngen_R11_M13_RHEUMA	ANGPTL1++ANGL1_NA_ANGL1	Weighted mode	4	-0.122361	0.0436997	0.0678506	-0.208012	-0.0367095	0.884829	0.812197	0.963956	0.976532
ANGPTL1	finngen_R11_M13_RHEUMA	Rheumatoid arthritis || id:finngen_R11_M13_RHEUMA	ANGPTL1++ANGL1_NA_ANGL1	Maximum likelihood	4	-0.105134	0.0351443	0.00277626	-0.174017	-0.0362508	0.900204	0.840283	0.964398	0.168268
ANGPTL1	finngen_R11_M13_RHEUMA	Rheumatoid arthritis || id:finngen_R11_M13_RHEUMA	ANGPTL1++ANGL1_NA_ANGL1	Simple mode	4	-0.115427	0.0802165	0.245761	-0.272651	0.0417971	0.890985	0.761358	1.04268	0.994896
KRT5	finngen_R11_M13_RHEUMA	Rheumatoid arthritis || id:finngen_R11_M13_RHEUMA	KRT5++K2C5_NA_K2C5	Inverse variance weighted	2	-0.0734308	0.203815	0.718637	-0.472909	0.326047	0.9292	0.623187	1.38548	0.990373
KRT5	finngen_R11_M13_RHEUMA	Rheumatoid arthritis || id:finngen_R11_M13_RHEUMA	KRT5++K2C5_NA_K2C5	Maximum likelihood	2	-0.0748684	0.0880124	0.394959	-0.247373	0.0976358	0.927866	0.78085	1.10256	0.890655
SVEP1	finngen_R11_M13_RHEUMA	Rheumatoid arthritis || id:finngen_R11_M13_RHEUMA	SVEP1++SVEP1_NA_SVEP1	Inverse variance weighted	7	0.015757	0.0289148	0.585789	-0.0409159	0.07243	1.01588	0.95991	1.07512	0.990373
SVEP1	finngen_R11_M13_RHEUMA	Rheumatoid arthritis || id:finngen_R11_M13_RHEUMA	SVEP1++SVEP1_NA_SVEP1	MR Egger	7	0.0379407	0.0474852	0.460544	-0.0551304	0.131012	1.03867	0.946362	1.13998	0.999671
SVEP1	finngen_R11_M13_RHEUMA	Rheumatoid arthritis || id:finngen_R11_M13_RHEUMA	SVEP1++SVEP1_NA_SVEP1	Weighted median	7	0.0190302	0.031662	0.547811	-0.0430272	0.0810876	1.01921	0.957885	1.08447	0.931419
SVEP1	finngen_R11_M13_RHEUMA	Rheumatoid arthritis || id:finngen_R11_M13_RHEUMA	SVEP1++SVEP1_NA_SVEP1	Weighted mode	7	0.0159468	0.0325571	0.64166	-0.047865	0.0797587	1.01607	0.953262	1.08303	0.9821
SVEP1	finngen_R11_M13_RHEUMA	Rheumatoid arthritis || id:finngen_R11_M13_RHEUMA	SVEP1++SVEP1_NA_SVEP1	Maximum likelihood	7	0.0157285	0.0289232	0.586578	-0.0409609	0.0724178	1.01585	0.959867	1.0751	0.925963
SVEP1	finngen_R11_M13_RHEUMA	Rheumatoid arthritis || id:finngen_R11_M13_RHEUMA	SVEP1++SVEP1_NA_SVEP1	Simple mode	7	0.00312537	0.0475045	0.949682	-0.0899835	0.0962343	1.00313	0.913946	1.10102	0.994896
CLEC12A	finngen_R11_M13_RHEUMA	Rheumatoid arthritis || id:finngen_R11_M13_RHEUMA	CLEC12A++CL12A_NA_CL12A	Inverse variance weighted	7	0.0365333	0.0290022	0.207786	-0.0203109	0.0933776	1.03721	0.979894	1.09788	0.927309
CLEC12A	finngen_R11_M13_RHEUMA	Rheumatoid arthritis || id:finngen_R11_M13_RHEUMA	CLEC12A++CL12A_NA_CL12A	MR Egger	7	0.0524959	0.0611704	0.429996	-0.0673981	0.17239	1.0539	0.934823	1.18814	0.999671
CLEC12A	finngen_R11_M13_RHEUMA	Rheumatoid arthritis || id:finngen_R11_M13_RHEUMA	CLEC12A++CL12A_NA_CL12A	Weighted median	7	0.0273675	0.0329675	0.406463	-0.0372489	0.0919839	1.02775	0.963436	1.09635	0.88643
CLEC12A	finngen_R11_M13_RHEUMA	Rheumatoid arthritis || id:finngen_R11_M13_RHEUMA	CLEC12A++CL12A_NA_CL12A	Weighted mode	7	0.0247835	0.0356407	0.51284	-0.0450722	0.0946392	1.02509	0.955928	1.09926	0.976532
CLEC12A	finngen_R11_M13_RHEUMA	Rheumatoid arthritis || id:finngen_R11_M13_RHEUMA	CLEC12A++CL12A_NA_CL12A	Maximum likelihood	7	0.0365572	0.0290257	0.207859	-0.0203332	0.0934476	1.03723	0.979872	1.09795	0.775689
CLEC12A	finngen_R11_M13_RHEUMA	Rheumatoid arthritis || id:finngen_R11_M13_RHEUMA	CLEC12A++CL12A_NA_CL12A	Simple mode	7	0.00657238	0.0469113	0.893164	-0.0853739	0.0985186	1.00659	0.918169	1.10353	0.994896
COL6A3	finngen_R11_M13_RHEUMA	Rheumatoid arthritis || id:finngen_R11_M13_RHEUMA	COL6A3++Collagen_alpha_3_VI	Inverse variance weighted	2	-0.124566	0.190467	0.513109	-0.497883	0.24875	0.88288	0.607816	1.28242	0.990373
COL6A3	finngen_R11_M13_RHEUMA	Rheumatoid arthritis || id:finngen_R11_M13_RHEUMA	COL6A3++Collagen_alpha_3_VI	Maximum likelihood	2	-0.125964	0.161576	0.43563	-0.442652	0.190725	0.881647	0.64233	1.21013	0.894507
NAGPA	finngen_R11_M13_RHEUMA	Rheumatoid arthritis || id:finngen_R11_M13_RHEUMA	NAGPA++NAGPA_NA_NAGPA	Inverse variance weighted	6	-0.0281509	0.0475631	0.553941	-0.121375	0.0650728	0.972242	0.885702	1.06724	0.990373
NAGPA	finngen_R11_M13_RHEUMA	Rheumatoid arthritis || id:finngen_R11_M13_RHEUMA	NAGPA++NAGPA_NA_NAGPA	MR Egger	6	-0.00422555	0.0856562	0.96302	-0.172112	0.163661	0.995783	0.841885	1.17781	0.999671
NAGPA	finngen_R11_M13_RHEUMA	Rheumatoid arthritis || id:finngen_R11_M13_RHEUMA	NAGPA++NAGPA_NA_NAGPA	Weighted median	6	-0.0400802	0.0342912	0.242477	-0.107291	0.0271306	0.960712	0.898264	1.0275	0.84593
NAGPA	finngen_R11_M13_RHEUMA	Rheumatoid arthritis || id:finngen_R11_M13_RHEUMA	NAGPA++NAGPA_NA_NAGPA	Weighted mode	6	-0.0433793	0.0375099	0.299736	-0.116899	0.0301401	0.957548	0.889675	1.0306	0.976532
NAGPA	finngen_R11_M13_RHEUMA	Rheumatoid arthritis || id:finngen_R11_M13_RHEUMA	NAGPA++NAGPA_NA_NAGPA	Maximum likelihood	6	-0.0282545	0.0341552	0.408102	-0.0951988	0.0386897	0.972141	0.909192	1.03945	0.890655
NAGPA	finngen_R11_M13_RHEUMA	Rheumatoid arthritis || id:finngen_R11_M13_RHEUMA	NAGPA++NAGPA_NA_NAGPA	Simple mode	6	-0.116348	0.106155	0.323033	-0.324412	0.0917163	0.890166	0.722952	1.09605	0.994896
TBCE	finngen_R11_M13_RHEUMA	Rheumatoid arthritis || id:finngen_R11_M13_RHEUMA	TBCE++TBCE_NA_TBCE	Inverse variance weighted	2	0.0206514	0.10995	0.851013	-0.19485	0.236153	1.02087	0.822958	1.26637	0.992378
TBCE	finngen_R11_M13_RHEUMA	Rheumatoid arthritis || id:finngen_R11_M13_RHEUMA	TBCE++TBCE_NA_TBCE	Maximum likelihood	2	0.0206531	0.109967	0.851025	-0.194882	0.236188	1.02087	0.822932	1.26641	0.975865
DNAJB9	finngen_R11_M13_RHEUMA	Rheumatoid arthritis || id:finngen_R11_M13_RHEUMA	DNAJB9++DNJB9_NA_DNJB9	Wald ratio	1	0.328843	0.354347	0.353393	-0.365676	1.02336	1.38936	0.693728	2.78254	0.777232
PCOLCE	finngen_R11_M13_RHEUMA	Rheumatoid arthritis || id:finngen_R11_M13_RHEUMA	PCOLCE++PCOC1_NA_PCOC1	Inverse variance weighted	2	-0.143043	0.114915	0.213217	-0.368277	0.0821909	0.866717	0.691926	1.08566	0.927309
PCOLCE	finngen_R11_M13_RHEUMA	Rheumatoid arthritis || id:finngen_R11_M13_RHEUMA	PCOLCE++PCOC1_NA_PCOC1	Maximum likelihood	2	-0.143663	0.0743577	0.0533532	-0.289404	0.00207824	0.86618	0.74871	1.00208	0.510732
ASL	finngen_R11_M13_RHEUMA	Rheumatoid arthritis || id:finngen_R11_M13_RHEUMA	ASL++ARLY_NA_ARLY	Inverse variance weighted	2	-0.0714712	0.0863666	0.407935	-0.24075	0.0978074	0.931023	0.786038	1.10275	0.990373
ASL	finngen_R11_M13_RHEUMA	Rheumatoid arthritis || id:finngen_R11_M13_RHEUMA	ASL++ARLY_NA_ARLY	Maximum likelihood	2	-0.0715108	0.0864286	0.408012	-0.240911	0.0978892	0.930986	0.785912	1.10284	0.890655
QDPR	finngen_R11_M13_RHEUMA	Rheumatoid arthritis || id:finngen_R11_M13_RHEUMA	QDPR++DHPR_NA_DHPR	Inverse variance weighted	4	-0.0155858	0.0348958	0.655137	-0.0839815	0.05281	0.984535	0.919448	1.05423	0.990373
QDPR	finngen_R11_M13_RHEUMA	Rheumatoid arthritis || id:finngen_R11_M13_RHEUMA	QDPR++DHPR_NA_DHPR	MR Egger	4	-0.00328088	0.071414	0.967531	-0.143252	0.136691	0.996724	0.866535	1.14647	0.999671
QDPR	finngen_R11_M13_RHEUMA	Rheumatoid arthritis || id:finngen_R11_M13_RHEUMA	QDPR++DHPR_NA_DHPR	Weighted median	4	-0.0134329	0.0357034	0.70674	-0.0834115	0.0565456	0.986657	0.919972	1.05817	0.97421
QDPR	finngen_R11_M13_RHEUMA	Rheumatoid arthritis || id:finngen_R11_M13_RHEUMA	QDPR++DHPR_NA_DHPR	Weighted mode	4	-0.0133945	0.0359925	0.734517	-0.0839399	0.0571508	0.986695	0.919487	1.05882	0.983092
QDPR	finngen_R11_M13_RHEUMA	Rheumatoid arthritis || id:finngen_R11_M13_RHEUMA	QDPR++DHPR_NA_DHPR	Maximum likelihood	4	-0.0155891	0.0349001	0.655107	-0.0839933	0.0528151	0.984532	0.919437	1.05423	0.93286
QDPR	finngen_R11_M13_RHEUMA	Rheumatoid arthritis || id:finngen_R11_M13_RHEUMA	QDPR++DHPR_NA_DHPR	Simple mode	4	-0.014042	0.0695541	0.85292	-0.150368	0.122284	0.986056	0.860391	1.13007	0.994896
ALDH1A1	finngen_R11_M13_RHEUMA	Rheumatoid arthritis || id:finngen_R11_M13_RHEUMA	ALDH1A1++Retinal_dehydrogenase_1	Wald ratio	1	-0.00368422	0.140528	0.979084	-0.279118	0.27175	0.996323	0.75645	1.31226	0.993351
SELPLG	finngen_R11_M13_RHEUMA	Rheumatoid arthritis || id:finngen_R11_M13_RHEUMA	SELPLG++SELPL_NA_SELPL	Wald ratio	1	0.0181886	0.0511944	0.722376	-0.0821524	0.11853	1.01835	0.921132	1.12584	0.935106
GSTT2B	finngen_R11_M13_RHEUMA	Rheumatoid arthritis || id:finngen_R11_M13_RHEUMA	GSTT2B++GSTT2_NA_GSTT2	Inverse variance weighted	2	0.175622	0.302188	0.561128	-0.416667	0.76791	1.19199	0.659241	2.15526	0.990373
GSTT2B	finngen_R11_M13_RHEUMA	Rheumatoid arthritis || id:finngen_R11_M13_RHEUMA	GSTT2B++GSTT2_NA_GSTT2	Maximum likelihood	2	0.177576	0.183297	0.332652	-0.181687	0.536839	1.19432	0.833862	1.71059	0.855362
ATF6	finngen_R11_M13_RHEUMA	Rheumatoid arthritis || id:finngen_R11_M13_RHEUMA	ATF6++ATF6A_NA_ATF6A	Wald ratio	1	0.0662485	0.248718	0.789962	-0.421239	0.553736	1.06849	0.656233	1.73974	0.94274
COL11A2	finngen_R11_M13_RHEUMA	Rheumatoid arthritis || id:finngen_R11_M13_RHEUMA	COL11A2++COL11A2_NA_COL11A2	Inverse variance weighted (multiplicative random effects)	4	0.0268832	0.331959	0.935455	-0.623756	0.677522	1.02725	0.535928	1.96899	0.996145
COL11A2	finngen_R11_M13_RHEUMA	Rheumatoid arthritis || id:finngen_R11_M13_RHEUMA	COL11A2++COL11A2_NA_COL11A2	MR Egger	4	1.1181	0.701493	0.251991	-0.256827	2.49303	3.05904	0.773502	12.0978	0.999671
COL11A2	finngen_R11_M13_RHEUMA	Rheumatoid arthritis || id:finngen_R11_M13_RHEUMA	COL11A2++COL11A2_NA_COL11A2	Weighted median	4	0.184242	0.057907	0.00146419	0.0707443	0.29774	1.20231	1.07331	1.34681	0.172147
COL11A2	finngen_R11_M13_RHEUMA	Rheumatoid arthritis || id:finngen_R11_M13_RHEUMA	COL11A2++COL11A2_NA_COL11A2	Weighted mode	4	0.184168	0.0572465	0.0486919	0.0719644	0.296371	1.20222	1.07462	1.34497	0.976532
COL11A2	finngen_R11_M13_RHEUMA	Rheumatoid arthritis || id:finngen_R11_M13_RHEUMA	COL11A2++COL11A2_NA_COL11A2	Maximum likelihood	4	0.0306759	0.0542678	0.571891	-0.075689	0.137041	1.03115	0.927105	1.14687	0.924823
COL11A2	finngen_R11_M13_RHEUMA	Rheumatoid arthritis || id:finngen_R11_M13_RHEUMA	COL11A2++COL11A2_NA_COL11A2	Simple mode	4	0.112245	0.0608566	0.162324	-0.0070343	0.231524	1.11879	0.99299	1.26052	0.994896
CYB5A	finngen_R11_M13_RHEUMA	Rheumatoid arthritis || id:finngen_R11_M13_RHEUMA	CYB5A++Cytochrome_b5	Wald ratio	1	0.101519	0.144135	0.481227	-0.180986	0.384024	1.10685	0.834447	1.46818	0.853181
NT5C2	finngen_R11_M13_RHEUMA	Rheumatoid arthritis || id:finngen_R11_M13_RHEUMA	NT5C2++5NTC_NA_5NTC	Inverse variance weighted	2	-0.0841085	0.103436	0.416135	-0.286843	0.118626	0.919332	0.75063	1.12595	0.990373
NT5C2	finngen_R11_M13_RHEUMA	Rheumatoid arthritis || id:finngen_R11_M13_RHEUMA	NT5C2++5NTC_NA_5NTC	Maximum likelihood	2	-0.0841599	0.103624	0.416697	-0.287263	0.118944	0.919284	0.750314	1.12631	0.890655
TNR	finngen_R11_M13_RHEUMA	Rheumatoid arthritis || id:finngen_R11_M13_RHEUMA	TNR++TENR_NA_TENR	Wald ratio	1	-0.0150175	0.0934593	0.872342	-0.198198	0.168163	0.985095	0.820208	1.18313	0.948945
CREB3L4	finngen_R11_M13_RHEUMA	Rheumatoid arthritis || id:finngen_R11_M13_RHEUMA	CREB3L4++CR3L4_NA_CR3L4	Inverse variance weighted	4	-0.0626415	0.0524566	0.232416	-0.165456	0.0401735	0.93928	0.847507	1.04099	0.944804
CREB3L4	finngen_R11_M13_RHEUMA	Rheumatoid arthritis || id:finngen_R11_M13_RHEUMA	CREB3L4++CR3L4_NA_CR3L4	MR Egger	4	-0.0833325	0.19459	0.71018	-0.464728	0.298063	0.920045	0.628306	1.34725	0.999671
CREB3L4	finngen_R11_M13_RHEUMA	Rheumatoid arthritis || id:finngen_R11_M13_RHEUMA	CREB3L4++CR3L4_NA_CR3L4	Weighted median	4	-0.0734564	0.0544201	0.177079	-0.18012	0.0332069	0.929177	0.83517	1.03376	0.834332
CREB3L4	finngen_R11_M13_RHEUMA	Rheumatoid arthritis || id:finngen_R11_M13_RHEUMA	CREB3L4++CR3L4_NA_CR3L4	Weighted mode	4	-0.0726412	0.0570614	0.2927	-0.184482	0.0391991	0.929934	0.831535	1.03998	0.976532
CREB3L4	finngen_R11_M13_RHEUMA	Rheumatoid arthritis || id:finngen_R11_M13_RHEUMA	CREB3L4++CR3L4_NA_CR3L4	Maximum likelihood	4	-0.0626686	0.0525017	0.232615	-0.165572	0.0402346	0.939255	0.847409	1.04106	0.7864
CREB3L4	finngen_R11_M13_RHEUMA	Rheumatoid arthritis || id:finngen_R11_M13_RHEUMA	CREB3L4++CR3L4_NA_CR3L4	Simple mode	4	-0.0661715	0.0818357	0.477926	-0.226569	0.0942264	0.93597	0.797264	1.09881	0.994896
ARHGAP25	finngen_R11_M13_RHEUMA	Rheumatoid arthritis || id:finngen_R11_M13_RHEUMA	ARHGAP25++RHG25_NA_RHG25	Wald ratio	1	0.112773	0.0813606	0.16572	-0.0466937	0.27224	1.11938	0.95438	1.3129	0.648366
NHEJ1	finngen_R11_M13_RHEUMA	Rheumatoid arthritis || id:finngen_R11_M13_RHEUMA	NHEJ1++NHEJ1_NA_NHEJ1	Inverse variance weighted	3	-0.0722002	0.182862	0.692964	-0.430609	0.286209	0.930345	0.650113	1.33137	0.990373
NHEJ1	finngen_R11_M13_RHEUMA	Rheumatoid arthritis || id:finngen_R11_M13_RHEUMA	NHEJ1++NHEJ1_NA_NHEJ1	MR Egger	3	-0.52072	2.26065	0.855875	-4.9516	3.91016	0.594093	0.00707207	49.9071	0.999671
NHEJ1	finngen_R11_M13_RHEUMA	Rheumatoid arthritis || id:finngen_R11_M13_RHEUMA	NHEJ1++NHEJ1_NA_NHEJ1	Weighted median	3	-0.0753587	0.190538	0.69247	-0.448813	0.298095	0.927411	0.638386	1.34729	0.97421
NHEJ1	finngen_R11_M13_RHEUMA	Rheumatoid arthritis || id:finngen_R11_M13_RHEUMA	NHEJ1++NHEJ1_NA_NHEJ1	Weighted mode	3	-0.0885804	0.195868	0.69541	-0.472482	0.295321	0.91523	0.623453	1.34356	0.9821
NHEJ1	finngen_R11_M13_RHEUMA	Rheumatoid arthritis || id:finngen_R11_M13_RHEUMA	NHEJ1++NHEJ1_NA_NHEJ1	Maximum likelihood	3	-0.0721981	0.182885	0.693011	-0.430653	0.286257	0.930347	0.650084	1.33143	0.940262
NHEJ1	finngen_R11_M13_RHEUMA	Rheumatoid arthritis || id:finngen_R11_M13_RHEUMA	NHEJ1++NHEJ1_NA_NHEJ1	Simple mode	3	-0.0124274	0.262589	0.966554	-0.527101	0.502247	0.987649	0.590314	1.65243	0.994896
RRM1	finngen_R11_M13_RHEUMA	Rheumatoid arthritis || id:finngen_R11_M13_RHEUMA	RRM1++RRM1_NA_RRM1	Wald ratio	1	0.279669	0.223491	0.210801	-0.158373	0.717711	1.32269	0.853531	2.04974	0.715607
ADH5	finngen_R11_M13_RHEUMA	Rheumatoid arthritis || id:finngen_R11_M13_RHEUMA	ADH5++ADHX_NA_ADHX	Inverse variance weighted	3	0.0185886	0.0979198	0.849438	-0.173334	0.210511	1.01876	0.840856	1.23431	0.992378
ADH5	finngen_R11_M13_RHEUMA	Rheumatoid arthritis || id:finngen_R11_M13_RHEUMA	ADH5++ADHX_NA_ADHX	MR Egger	3	0.232114	0.17549	0.412124	-0.111847	0.576075	1.26126	0.894181	1.77904	0.999671
ADH5	finngen_R11_M13_RHEUMA	Rheumatoid arthritis || id:finngen_R11_M13_RHEUMA	ADH5++ADHX_NA_ADHX	Weighted median	3	0.0224296	0.0900743	0.803351	-0.154116	0.198975	1.02268	0.857173	1.22015	0.982685
ADH5	finngen_R11_M13_RHEUMA	Rheumatoid arthritis || id:finngen_R11_M13_RHEUMA	ADH5++ADHX_NA_ADHX	Weighted mode	3	0.0523451	0.0938305	0.633046	-0.131563	0.236253	1.05374	0.876724	1.26649	0.9821
ADH5	finngen_R11_M13_RHEUMA	Rheumatoid arthritis || id:finngen_R11_M13_RHEUMA	ADH5++ADHX_NA_ADHX	Maximum likelihood	3	0.0186688	0.0855471	0.827251	-0.149004	0.186341	1.01884	0.861566	1.20483	0.975865
ADH5	finngen_R11_M13_RHEUMA	Rheumatoid arthritis || id:finngen_R11_M13_RHEUMA	ADH5++ADHX_NA_ADHX	Simple mode	3	0.131641	0.168978	0.517499	-0.199556	0.462839	1.1407	0.819094	1.58858	0.994896
SYK	finngen_R11_M13_RHEUMA	Rheumatoid arthritis || id:finngen_R11_M13_RHEUMA	SYK++KSYK_NA_KSYK	Wald ratio	1	0.0261306	0.149792	0.861515	-0.267461	0.319722	1.02647	0.76532	1.37674	0.948945
ATF6B	finngen_R11_M13_RHEUMA	Rheumatoid arthritis || id:finngen_R11_M13_RHEUMA	ATF6B++ATF6B_NA_ATF6B	Wald ratio	1	0.233914	0.297398	0.431555	-0.348987	0.816814	1.26354	0.705403	2.26328	0.830108
WFDC2	finngen_R11_M13_RHEUMA	Rheumatoid arthritis || id:finngen_R11_M13_RHEUMA	WFDC2++HE4_NA_HE4	Wald ratio	1	0.139806	0.176672	0.42875	-0.20647	0.486082	1.15005	0.81345	1.62593	0.830108
PDLIM1	finngen_R11_M13_RHEUMA	Rheumatoid arthritis || id:finngen_R11_M13_RHEUMA	PDLIM1++PDLI1_NA_PDLI1	Wald ratio	1	-0.499077	0.18431	0.00677296	-0.860325	-0.137828	0.607091	0.423025	0.871248	0.193536
PYGL	finngen_R11_M13_RHEUMA	Rheumatoid arthritis || id:finngen_R11_M13_RHEUMA	PYGL++PYGL_NA_PYGL	Inverse variance weighted	2	-0.0923613	0.0981728	0.346805	-0.28478	0.100057	0.911776	0.75218	1.10523	0.990373
PYGL	finngen_R11_M13_RHEUMA	Rheumatoid arthritis || id:finngen_R11_M13_RHEUMA	PYGL++PYGL_NA_PYGL	Maximum likelihood	2	-0.0926279	0.0985243	0.347139	-0.285736	0.10048	0.911533	0.751461	1.1057	0.870981
ALDH3A1	finngen_R11_M13_RHEUMA	Rheumatoid arthritis || id:finngen_R11_M13_RHEUMA	ALDH3A1++Aldehyde_dehydrogenase__class_3	Wald ratio	1	0.0228167	0.102079	0.82313	-0.177258	0.222891	1.02308	0.837564	1.24968	0.944479
DYNLL2	finngen_R11_M13_RHEUMA	Rheumatoid arthritis || id:finngen_R11_M13_RHEUMA	DYNLL2++DYL2_NA_DYL2	Wald ratio	1	-0.147352	0.238146	0.536085	-0.614119	0.319416	0.862991	0.541118	1.37632	0.873359
CD59	finngen_R11_M13_RHEUMA	Rheumatoid arthritis || id:finngen_R11_M13_RHEUMA	CD59++CD59_NA_CD59	Inverse variance weighted	3	-0.0709349	0.0692538	0.305706	-0.206672	0.0648026	0.931523	0.813286	1.06695	0.986776
CD59	finngen_R11_M13_RHEUMA	Rheumatoid arthritis || id:finngen_R11_M13_RHEUMA	CD59++CD59_NA_CD59	MR Egger	3	-0.0203961	0.236957	0.945338	-0.484832	0.44404	0.979811	0.6158	1.55899	0.999671
CD59	finngen_R11_M13_RHEUMA	Rheumatoid arthritis || id:finngen_R11_M13_RHEUMA	CD59++CD59_NA_CD59	Weighted median	3	-0.0823034	0.0662815	0.214339	-0.212215	0.0476085	0.920993	0.808791	1.04876	0.834332
CD59	finngen_R11_M13_RHEUMA	Rheumatoid arthritis || id:finngen_R11_M13_RHEUMA	CD59++CD59_NA_CD59	Weighted mode	3	-0.0816927	0.0669264	0.346604	-0.212868	0.049483	0.921555	0.808263	1.05073	0.976532
CD59	finngen_R11_M13_RHEUMA	Rheumatoid arthritis || id:finngen_R11_M13_RHEUMA	CD59++CD59_NA_CD59	Maximum likelihood	3	-0.0711329	0.0630185	0.258998	-0.194649	0.0523834	0.931338	0.823123	1.05378	0.808464
CD59	finngen_R11_M13_RHEUMA	Rheumatoid arthritis || id:finngen_R11_M13_RHEUMA	CD59++CD59_NA_CD59	Simple mode	3	-0.13667	0.097811	0.297164	-0.328379	0.0550398	0.872258	0.72009	1.05658	0.994896
FABP1	finngen_R11_M13_RHEUMA	Rheumatoid arthritis || id:finngen_R11_M13_RHEUMA	FABP1++FABPL_NA_FABPL	Wald ratio	1	0.123593	0.112156	0.270475	-0.0962334	0.343419	1.13155	0.908252	1.40976	0.722927
HMBS	finngen_R11_M13_RHEUMA	Rheumatoid arthritis || id:finngen_R11_M13_RHEUMA	HMBS++HEM3_NA_HEM3	Wald ratio	1	-0.520232	0.23128	0.0244895	-0.973541	-0.0669234	0.594383	0.377743	0.935267	0.284181
FOXO3	finngen_R11_M13_RHEUMA	Rheumatoid arthritis || id:finngen_R11_M13_RHEUMA	FOXO3++FOXO3A_NA_FOXO3A	Wald ratio	1	-0.019418	0.230139	0.932758	-0.47049	0.431654	0.980769	0.624696	1.5398	0.97599
LIMA1	finngen_R11_M13_RHEUMA	Rheumatoid arthritis || id:finngen_R11_M13_RHEUMA	LIMA1++LIMA1_NA_LIMA1	Wald ratio	1	0.0631624	0.20905	0.762546	-0.346576	0.472901	1.0652	0.707105	1.60464	0.941769
MUSK	finngen_R11_M13_RHEUMA	Rheumatoid arthritis || id:finngen_R11_M13_RHEUMA	MUSK++MUSK_NA_MUSK	Wald ratio	1	-0.162969	0.189265	0.389201	-0.533928	0.207989	0.849617	0.586298	1.2312	0.789737
FKBP1B	finngen_R11_M13_RHEUMA	Rheumatoid arthritis || id:finngen_R11_M13_RHEUMA	FKBP1B++FKB1B_NA_FKB1B	Inverse variance weighted	2	-0.0121513	0.0632227	0.847587	-0.136068	0.111765	0.987922	0.872784	1.11825	0.992378
FKBP1B	finngen_R11_M13_RHEUMA	Rheumatoid arthritis || id:finngen_R11_M13_RHEUMA	FKBP1B++FKB1B_NA_FKB1B	Maximum likelihood	2	-0.012153	0.0632327	0.847589	-0.136089	0.111783	0.987921	0.872765	1.11827	0.975865
DNAJB6	finngen_R11_M13_RHEUMA	Rheumatoid arthritis || id:finngen_R11_M13_RHEUMA	DNAJB6++DNJB6_NA_DNJB6	Wald ratio	1	0.214178	0.243624	0.379327	-0.263324	0.691681	1.23884	0.768493	1.99707	0.783932
DAPP1	finngen_R11_M13_RHEUMA	Rheumatoid arthritis || id:finngen_R11_M13_RHEUMA	DAPP1++DAPP1_NA_DAPP1	Wald ratio	1	-0.156833	0.243633	0.519752	-0.634354	0.320687	0.854847	0.530278	1.37807	0.859133
HSF1	finngen_R11_M13_RHEUMA	Rheumatoid arthritis || id:finngen_R11_M13_RHEUMA	HSF1++HSF1_NA_HSF1	Wald ratio	1	-0.112318	0.193192	0.560987	-0.490975	0.26634	0.89376	0.612029	1.30518	0.885183
TAGLN2	finngen_R11_M13_RHEUMA	Rheumatoid arthritis || id:finngen_R11_M13_RHEUMA	TAGLN2++Transgelin_2	Wald ratio	1	-0.339355	0.130819	0.00948411	-0.59576	-0.082951	0.712229	0.551144	0.920396	0.193536
DTX3L	finngen_R11_M13_RHEUMA	Rheumatoid arthritis || id:finngen_R11_M13_RHEUMA	DTX3L++DTX3L_NA_DTX3L	Wald ratio	1	-0.15399	0.0823703	0.0615563	-0.315435	0.0074563	0.857281	0.729471	1.00748	0.472117
CHST9	finngen_R11_M13_RHEUMA	Rheumatoid arthritis || id:finngen_R11_M13_RHEUMA	CHST9++Carbohydrate_sulfotransferase_9	Inverse variance weighted	4	0.052788	0.0662477	0.425551	-0.0770575	0.182633	1.05421	0.925837	1.20037	0.990373
CHST9	finngen_R11_M13_RHEUMA	Rheumatoid arthritis || id:finngen_R11_M13_RHEUMA	CHST9++Carbohydrate_sulfotransferase_9	MR Egger	4	0.201049	0.129225	0.260024	-0.0522327	0.45433	1.22268	0.949108	1.57512	0.999671
CHST9	finngen_R11_M13_RHEUMA	Rheumatoid arthritis || id:finngen_R11_M13_RHEUMA	CHST9++Carbohydrate_sulfotransferase_9	Weighted median	4	0.0671082	0.0506852	0.185497	-0.0322348	0.166451	1.06941	0.968279	1.18111	0.834332
CHST9	finngen_R11_M13_RHEUMA	Rheumatoid arthritis || id:finngen_R11_M13_RHEUMA	CHST9++Carbohydrate_sulfotransferase_9	Weighted mode	4	0.0810478	0.0564919	0.246861	-0.0296762	0.191772	1.08442	0.97076	1.21139	0.976532
CHST9	finngen_R11_M13_RHEUMA	Rheumatoid arthritis || id:finngen_R11_M13_RHEUMA	CHST9++Carbohydrate_sulfotransferase_9	Maximum likelihood	4	0.0530253	0.0494336	0.283426	-0.0438647	0.149915	1.05446	0.957083	1.16174	0.828817
CHST9	finngen_R11_M13_RHEUMA	Rheumatoid arthritis || id:finngen_R11_M13_RHEUMA	CHST9++Carbohydrate_sulfotransferase_9	Simple mode	4	0.0902733	0.112891	0.482375	-0.130994	0.31154	1.09447	0.877223	1.36553	0.994896
EVL	finngen_R11_M13_RHEUMA	Rheumatoid arthritis || id:finngen_R11_M13_RHEUMA	EVL++EVL_NA_EVL	Inverse variance weighted	3	-0.103041	0.114059	0.366315	-0.326596	0.120515	0.90209	0.721375	1.12808	0.990373
EVL	finngen_R11_M13_RHEUMA	Rheumatoid arthritis || id:finngen_R11_M13_RHEUMA	EVL++EVL_NA_EVL	MR Egger	3	-0.358218	0.508281	0.609169	-1.35445	0.638013	0.698921	0.25809	1.89272	0.999671
EVL	finngen_R11_M13_RHEUMA	Rheumatoid arthritis || id:finngen_R11_M13_RHEUMA	EVL++EVL_NA_EVL	Weighted median	3	-0.0329424	0.131484	0.802167	-0.290651	0.224766	0.967594	0.747777	1.25203	0.982685
EVL	finngen_R11_M13_RHEUMA	Rheumatoid arthritis || id:finngen_R11_M13_RHEUMA	EVL++EVL_NA_EVL	Weighted mode	3	-0.0261875	0.160584	0.885447	-0.340932	0.288557	0.974152	0.711107	1.3345	0.984041
EVL	finngen_R11_M13_RHEUMA	Rheumatoid arthritis || id:finngen_R11_M13_RHEUMA	EVL++EVL_NA_EVL	Maximum likelihood	3	-0.103678	0.11473	0.366171	-0.328549	0.121193	0.901515	0.719967	1.12884	0.881959
EVL	finngen_R11_M13_RHEUMA	Rheumatoid arthritis || id:finngen_R11_M13_RHEUMA	EVL++EVL_NA_EVL	Simple mode	3	-0.0269175	0.1678	0.887293	-0.355806	0.301971	0.973442	0.700609	1.35252	0.994896
CLINT1	finngen_R11_M13_RHEUMA	Rheumatoid arthritis || id:finngen_R11_M13_RHEUMA	CLINT1++EPN4_NA_EPN4	Wald ratio	1	-0.237579	0.247008	0.336136	-0.721714	0.246557	0.788535	0.485918	1.27961	0.772525
AGFG1	finngen_R11_M13_RHEUMA	Rheumatoid arthritis || id:finngen_R11_M13_RHEUMA	AGFG1++NUPL_NA_NUPL	Wald ratio	1	0.154336	0.136435	0.25797	-0.113077	0.421749	1.16688	0.893082	1.52463	0.722927
LCN1	finngen_R11_M13_RHEUMA	Rheumatoid arthritis || id:finngen_R11_M13_RHEUMA	LCN1++LCN1_NA_LCN1	Wald ratio	1	-0.0621353	0.192671	0.747078	-0.43977	0.315499	0.939756	0.644185	1.37094	0.935106
S100A2	finngen_R11_M13_RHEUMA	Rheumatoid arthritis || id:finngen_R11_M13_RHEUMA	S100A2++S100A2_NA_S100A2	Inverse variance weighted	2	0.0352675	0.115452	0.760007	-0.191019	0.261554	1.0359	0.826117	1.29895	0.990373
S100A2	finngen_R11_M13_RHEUMA	Rheumatoid arthritis || id:finngen_R11_M13_RHEUMA	S100A2++S100A2_NA_S100A2	Maximum likelihood	2	0.0352682	0.115482	0.760061	-0.191076	0.261613	1.0359	0.82607	1.29902	0.95774
CBL	finngen_R11_M13_RHEUMA	Rheumatoid arthritis || id:finngen_R11_M13_RHEUMA	CBL++CBL_NA_CBL	Wald ratio	1	0.352366	0.150225	0.0189971	0.0579248	0.646807	1.42243	1.05964	1.90943	0.258083
RPS6KA1	finngen_R11_M13_RHEUMA	Rheumatoid arthritis || id:finngen_R11_M13_RHEUMA	RPS6KA1++KS6A1_NA_KS6A1	Wald ratio	1	-0.0476273	0.128731	0.7114	-0.299939	0.204685	0.953489	0.740863	1.22714	0.930618
RPIA	finngen_R11_M13_RHEUMA	Rheumatoid arthritis || id:finngen_R11_M13_RHEUMA	RPIA++RPIA_NA_RPIA	Wald ratio	1	-0.0606678	0.101605	0.550442	-0.259813	0.138477	0.941136	0.771196	1.14852	0.882579
ACAP2	finngen_R11_M13_RHEUMA	Rheumatoid arthritis || id:finngen_R11_M13_RHEUMA	ACAP2++CENB2_NA_CENB2	Wald ratio	1	-0.000532483	0.246387	0.998276	-0.483451	0.482386	0.999468	0.616652	1.61993	0.999659
CCM2	finngen_R11_M13_RHEUMA	Rheumatoid arthritis || id:finngen_R11_M13_RHEUMA	CCM2++CCM2_NA_CCM2	Wald ratio	1	-0.0768926	0.208774	0.712645	-0.486089	0.332304	0.925989	0.615027	1.39418	0.930618
SARS2	finngen_R11_M13_RHEUMA	Rheumatoid arthritis || id:finngen_R11_M13_RHEUMA	SARS2++SYSM_NA_SYSM	Wald ratio	1	0.068039	0.120168	0.571257	-0.16749	0.303568	1.07041	0.845785	1.35468	0.885657
SRI	finngen_R11_M13_RHEUMA	Rheumatoid arthritis || id:finngen_R11_M13_RHEUMA	SRI++Sorcin_NA_Sorcin	Wald ratio	1	-0.0340814	0.129944	0.793107	-0.288771	0.220608	0.966493	0.749184	1.24683	0.94274
SNAP29	finngen_R11_M13_RHEUMA	Rheumatoid arthritis || id:finngen_R11_M13_RHEUMA	SNAP29++SNP29_NA_SNP29	Wald ratio	1	-0.051902	0.168009	0.757379	-0.381199	0.277395	0.949422	0.683042	1.31969	0.94077
RRAS2	finngen_R11_M13_RHEUMA	Rheumatoid arthritis || id:finngen_R11_M13_RHEUMA	RRAS2++RRAS2_NA_RRAS2	Wald ratio	1	-0.0320968	0.0290355	0.268972	-0.0890065	0.0248128	0.968413	0.91484	1.02512	0.722927
CRYGD	finngen_R11_M13_RHEUMA	Rheumatoid arthritis || id:finngen_R11_M13_RHEUMA	CRYGD++CRGD_NA_CRGD	Wald ratio	1	-0.026501	0.112436	0.813666	-0.246876	0.193874	0.973847	0.781238	1.21394	0.944479
CDKN2D	finngen_R11_M13_RHEUMA	Rheumatoid arthritis || id:finngen_R11_M13_RHEUMA	CDKN2D++p19_INK4d	Wald ratio	1	0.209421	0.157971	0.18494	-0.100201	0.519044	1.23296	0.904655	1.68042	0.679143
TAPBP	finngen_R11_M13_RHEUMA	Rheumatoid arthritis || id:finngen_R11_M13_RHEUMA	TAPBP++TPSN_NA_TPSN	Inverse variance weighted	2	-0.0309344	0.0625244	0.620772	-0.153482	0.0916135	0.969539	0.857716	1.09594	0.990373
TAPBP	finngen_R11_M13_RHEUMA	Rheumatoid arthritis || id:finngen_R11_M13_RHEUMA	TAPBP++TPSN_NA_TPSN	Maximum likelihood	2	-0.0309343	0.0625268	0.620787	-0.153487	0.0916183	0.969539	0.857712	1.09595	0.929849
PDLIM4	finngen_R11_M13_RHEUMA	Rheumatoid arthritis || id:finngen_R11_M13_RHEUMA	PDLIM4++PDLI4_NA_PDLI4	Wald ratio	1	0.0449255	0.085438	0.59901	-0.122533	0.212384	1.04595	0.884677	1.23662	0.885657
DARS2	finngen_R11_M13_RHEUMA	Rheumatoid arthritis || id:finngen_R11_M13_RHEUMA	DARS2++SYDM_NA_SYDM	Wald ratio	1	-0.218313	0.154311	0.157139	-0.520763	0.0841365	0.803874	0.594067	1.08778	0.644801
HIBCH	finngen_R11_M13_RHEUMA	Rheumatoid arthritis || id:finngen_R11_M13_RHEUMA	HIBCH++HIBCH_NA_HIBCH	Inverse variance weighted	5	-0.102434	0.044639	0.0217495	-0.189926	-0.0149413	0.902638	0.82702	0.98517	0.497131
HIBCH	finngen_R11_M13_RHEUMA	Rheumatoid arthritis || id:finngen_R11_M13_RHEUMA	HIBCH++HIBCH_NA_HIBCH	MR Egger	5	-0.040695	0.096061	0.700369	-0.228974	0.147585	0.960122	0.795349	1.15903	0.999671
HIBCH	finngen_R11_M13_RHEUMA	Rheumatoid arthritis || id:finngen_R11_M13_RHEUMA	HIBCH++HIBCH_NA_HIBCH	Weighted median	5	-0.0973818	0.038836	0.0121584	-0.1735	-0.0212632	0.90721	0.840717	0.978961	0.362931
HIBCH	finngen_R11_M13_RHEUMA	Rheumatoid arthritis || id:finngen_R11_M13_RHEUMA	HIBCH++HIBCH_NA_HIBCH	Weighted mode	5	-0.0966572	0.0378165	0.0629072	-0.170778	-0.0225368	0.907867	0.843009	0.977715	0.976532
HIBCH	finngen_R11_M13_RHEUMA	Rheumatoid arthritis || id:finngen_R11_M13_RHEUMA	HIBCH++HIBCH_NA_HIBCH	Maximum likelihood	5	-0.10264	0.0369775	0.00550756	-0.175116	-0.0301641	0.902452	0.83936	0.970286	0.198274
HIBCH	finngen_R11_M13_RHEUMA	Rheumatoid arthritis || id:finngen_R11_M13_RHEUMA	HIBCH++HIBCH_NA_HIBCH	Simple mode	5	-0.236064	0.116406	0.112476	-0.464219	-0.00790828	0.78973	0.628626	0.992123	0.994896
CCDC50	finngen_R11_M13_RHEUMA	Rheumatoid arthritis || id:finngen_R11_M13_RHEUMA	CCDC50++CCD50_NA_CCD50	Wald ratio	1	-0.136997	0.242833	0.572643	-0.612949	0.338955	0.871973	0.541751	1.40348	0.885657
STAMBPL1	finngen_R11_M13_RHEUMA	Rheumatoid arthritis || id:finngen_R11_M13_RHEUMA	STAMBPL1++STALP_NA_STALP	Inverse variance weighted	2	0.154186	0.114381	0.177658	-0.0700011	0.378373	1.16671	0.932393	1.45991	0.909715
STAMBPL1	finngen_R11_M13_RHEUMA	Rheumatoid arthritis || id:finngen_R11_M13_RHEUMA	STAMBPL1++STALP_NA_STALP	Maximum likelihood	2	0.154896	0.103926	0.136105	-0.048798	0.35859	1.16754	0.952373	1.43131	0.663866
MAX	finngen_R11_M13_RHEUMA	Rheumatoid arthritis || id:finngen_R11_M13_RHEUMA	MAX++MAX_NA_MAX	Wald ratio	1	-0.0537001	0.0699264	0.442516	-0.190756	0.0833557	0.947716	0.826334	1.08693	0.838372
ALOX15B	finngen_R11_M13_RHEUMA	Rheumatoid arthritis || id:finngen_R11_M13_RHEUMA	ALOX15B++LX15B_NA_LX15B	Wald ratio	1	-0.0475449	0.182139	0.794064	-0.404537	0.309448	0.953568	0.667285	1.36267	0.94274
THYN1	finngen_R11_M13_RHEUMA	Rheumatoid arthritis || id:finngen_R11_M13_RHEUMA	THYN1++THYN1_NA_THYN1	Wald ratio	1	-0.175788	0.263986	0.505475	-0.6932	0.341624	0.838796	0.499974	1.40723	0.853181
LYPLAL1	finngen_R11_M13_RHEUMA	Rheumatoid arthritis || id:finngen_R11_M13_RHEUMA	LYPLAL1++LYPL1_NA_LYPL1	Wald ratio	1	-0.143336	0.134245	0.285647	-0.406457	0.119784	0.866463	0.666006	1.12725	0.747378
PELO	finngen_R11_M13_RHEUMA	Rheumatoid arthritis || id:finngen_R11_M13_RHEUMA	PELO++PELO_NA_PELO	Wald ratio	1	-0.395967	0.304989	0.194184	-0.993745	0.201811	0.673029	0.370188	1.22362	0.689428
CACYBP	finngen_R11_M13_RHEUMA	Rheumatoid arthritis || id:finngen_R11_M13_RHEUMA	CACYBP++CYBP_NA_CYBP	Wald ratio	1	-0.0162211	0.100015	0.871158	-0.21225	0.179808	0.98391	0.808763	1.19699	0.948945
ULK3	finngen_R11_M13_RHEUMA	Rheumatoid arthritis || id:finngen_R11_M13_RHEUMA	ULK3++ULK3_NA_ULK3	Wald ratio	1	0.221055	0.150389	0.141592	-0.0737071	0.515818	1.24739	0.928944	1.67501	0.615412
MPG	finngen_R11_M13_RHEUMA	Rheumatoid arthritis || id:finngen_R11_M13_RHEUMA	MPG++3MG_NA_3MG	Wald ratio	1	0.16596	0.130018	0.201799	-0.0888747	0.420795	1.18053	0.91496	1.52317	0.693841
ANKRD27	finngen_R11_M13_RHEUMA	Rheumatoid arthritis || id:finngen_R11_M13_RHEUMA	ANKRD27++ANR27_NA_ANR27	Wald ratio	1	-0.364713	0.235596	0.121612	-0.82648	0.0970551	0.694396	0.437587	1.10192	0.569588
PPIH	finngen_R11_M13_RHEUMA	Rheumatoid arthritis || id:finngen_R11_M13_RHEUMA	PPIH++PPIH_NA_PPIH	Inverse variance weighted	3	-0.0142293	0.0367188	0.698371	-0.0861981	0.0577396	0.985871	0.917412	1.05944	0.990373
PPIH	finngen_R11_M13_RHEUMA	Rheumatoid arthritis || id:finngen_R11_M13_RHEUMA	PPIH++PPIH_NA_PPIH	MR Egger	3	-0.0211409	0.0693995	0.811755	-0.157164	0.114882	0.979081	0.854564	1.12174	0.999671
PPIH	finngen_R11_M13_RHEUMA	Rheumatoid arthritis || id:finngen_R11_M13_RHEUMA	PPIH++PPIH_NA_PPIH	Weighted median	3	-0.0148268	0.0382169	0.698043	-0.0897318	0.0600783	0.985283	0.914176	1.06192	0.97421
PPIH	finngen_R11_M13_RHEUMA	Rheumatoid arthritis || id:finngen_R11_M13_RHEUMA	PPIH++PPIH_NA_PPIH	Weighted mode	3	-0.0152105	0.0378822	0.726877	-0.0894596	0.0590387	0.984905	0.914425	1.06082	0.983092
PPIH	finngen_R11_M13_RHEUMA	Rheumatoid arthritis || id:finngen_R11_M13_RHEUMA	PPIH++PPIH_NA_PPIH	Maximum likelihood	3	-0.0142285	0.0367386	0.698541	-0.0862361	0.0577791	0.985872	0.917378	1.05948	0.940262
PPIH	finngen_R11_M13_RHEUMA	Rheumatoid arthritis || id:finngen_R11_M13_RHEUMA	PPIH++PPIH_NA_PPIH	Simple mode	3	-0.0304968	0.0800586	0.739911	-0.187412	0.126418	0.969964	0.829102	1.13476	0.994896
PMVK	finngen_R11_M13_RHEUMA	Rheumatoid arthritis || id:finngen_R11_M13_RHEUMA	PMVK++PMVK_NA_PMVK	Inverse variance weighted	3	-0.169509	0.130238	0.193077	-0.424775	0.085758	0.844079	0.653917	1.08954	0.927309
PMVK	finngen_R11_M13_RHEUMA	Rheumatoid arthritis || id:finngen_R11_M13_RHEUMA	PMVK++PMVK_NA_PMVK	MR Egger	3	-0.10158	0.504628	0.873541	-1.09065	0.88749	0.903409	0.335998	2.42903	0.999671
PMVK	finngen_R11_M13_RHEUMA	Rheumatoid arthritis || id:finngen_R11_M13_RHEUMA	PMVK++PMVK_NA_PMVK	Weighted median	3	-0.131808	0.145942	0.366443	-0.417854	0.154238	0.876509	0.658458	1.16677	0.88643
PMVK	finngen_R11_M13_RHEUMA	Rheumatoid arthritis || id:finngen_R11_M13_RHEUMA	PMVK++PMVK_NA_PMVK	Weighted mode	3	-0.0573033	0.185017	0.786066	-0.419937	0.30533	0.944308	0.657088	1.35707	0.984041
PMVK	finngen_R11_M13_RHEUMA	Rheumatoid arthritis || id:finngen_R11_M13_RHEUMA	PMVK++PMVK_NA_PMVK	Maximum likelihood	3	-0.171061	0.13166	0.193855	-0.429114	0.0869932	0.84277	0.651085	1.09089	0.75388
PMVK	finngen_R11_M13_RHEUMA	Rheumatoid arthritis || id:finngen_R11_M13_RHEUMA	PMVK++PMVK_NA_PMVK	Simple mode	3	-0.0299016	0.209803	0.899729	-0.441115	0.381312	0.970541	0.643319	1.4642	0.994896
ADI1	finngen_R11_M13_RHEUMA	Rheumatoid arthritis || id:finngen_R11_M13_RHEUMA	ADI1++MTND_NA_MTND	Wald ratio	1	0.16177	0.132424	0.221856	-0.0977807	0.42132	1.17559	0.906848	1.52397	0.722258
PLEKHA1	finngen_R11_M13_RHEUMA	Rheumatoid arthritis || id:finngen_R11_M13_RHEUMA	PLEKHA1++PKHA1_NA_PKHA1	Inverse variance weighted	4	-0.0630446	0.0416657	0.130253	-0.144709	0.0186202	0.938902	0.865274	1.01879	0.838508
PLEKHA1	finngen_R11_M13_RHEUMA	Rheumatoid arthritis || id:finngen_R11_M13_RHEUMA	PLEKHA1++PKHA1_NA_PKHA1	MR Egger	4	-0.0364973	0.0653175	0.632535	-0.16452	0.091525	0.964161	0.848301	1.09584	0.999671
PLEKHA1	finngen_R11_M13_RHEUMA	Rheumatoid arthritis || id:finngen_R11_M13_RHEUMA	PLEKHA1++PKHA1_NA_PKHA1	Weighted median	4	-0.0604629	0.0431914	0.161549	-0.145118	0.0241924	0.941329	0.86492	1.02449	0.814013
PLEKHA1	finngen_R11_M13_RHEUMA	Rheumatoid arthritis || id:finngen_R11_M13_RHEUMA	PLEKHA1++PKHA1_NA_PKHA1	Weighted mode	4	-0.057827	0.0456942	0.295038	-0.147388	0.0317336	0.943813	0.862959	1.03224	0.976532
PLEKHA1	finngen_R11_M13_RHEUMA	Rheumatoid arthritis || id:finngen_R11_M13_RHEUMA	PLEKHA1++PKHA1_NA_PKHA1	Maximum likelihood	4	-0.0631291	0.0417292	0.130323	-0.144918	0.0186601	0.938822	0.865093	1.01884	0.663866
PLEKHA1	finngen_R11_M13_RHEUMA	Rheumatoid arthritis || id:finngen_R11_M13_RHEUMA	PLEKHA1++PKHA1_NA_PKHA1	Simple mode	4	-0.0690447	0.0834272	0.468582	-0.232562	0.0944726	0.933285	0.792501	1.09908	0.994896
MAPRE1	finngen_R11_M13_RHEUMA	Rheumatoid arthritis || id:finngen_R11_M13_RHEUMA	MAPRE1++MARE1_NA_MARE1	Wald ratio	1	-0.355299	0.209954	0.0905939	-0.766808	0.0562102	0.700964	0.464493	1.05782	0.541774
CLIC5	finngen_R11_M13_RHEUMA	Rheumatoid arthritis || id:finngen_R11_M13_RHEUMA	CLIC5++CLIC5_NA_CLIC5	Inverse variance weighted	6	0.0494702	0.066075	0.454039	-0.0800367	0.178977	1.05071	0.923082	1.19599	0.990373
CLIC5	finngen_R11_M13_RHEUMA	Rheumatoid arthritis || id:finngen_R11_M13_RHEUMA	CLIC5++CLIC5_NA_CLIC5	MR Egger	6	0.134349	0.0763053	0.153097	-0.0152097	0.283907	1.14379	0.984905	1.32831	0.999671
CLIC5	finngen_R11_M13_RHEUMA	Rheumatoid arthritis || id:finngen_R11_M13_RHEUMA	CLIC5++CLIC5_NA_CLIC5	Weighted median	6	0.0663211	0.0538942	0.21848	-0.0393114	0.171954	1.06857	0.961451	1.18762	0.834332
CLIC5	finngen_R11_M13_RHEUMA	Rheumatoid arthritis || id:finngen_R11_M13_RHEUMA	CLIC5++CLIC5_NA_CLIC5	Weighted mode	6	0.0782482	0.0580341	0.235413	-0.0354987	0.191995	1.08139	0.965124	1.21166	0.976532
CLIC5	finngen_R11_M13_RHEUMA	Rheumatoid arthritis || id:finngen_R11_M13_RHEUMA	CLIC5++CLIC5_NA_CLIC5	Maximum likelihood	6	0.0498618	0.0510914	0.329098	-0.0502774	0.150001	1.05113	0.950966	1.16184	0.855362
CLIC5	finngen_R11_M13_RHEUMA	Rheumatoid arthritis || id:finngen_R11_M13_RHEUMA	CLIC5++CLIC5_NA_CLIC5	Simple mode	6	0.148365	0.143469	0.348478	-0.132834	0.429564	1.15994	0.875611	1.53659	0.994896
GABARAPL2	finngen_R11_M13_RHEUMA	Rheumatoid arthritis || id:finngen_R11_M13_RHEUMA	GABARAPL2++GBRL2_NA_GBRL2	Wald ratio	1	-0.0848592	0.138604	0.540379	-0.356524	0.186805	0.918642	0.700106	1.20539	0.873359
RAD23B	finngen_R11_M13_RHEUMA	Rheumatoid arthritis || id:finngen_R11_M13_RHEUMA	RAD23B++RD23B_NA_RD23B	Wald ratio	1	-0.258029	0.261982	0.324669	-0.771514	0.255457	0.772573	0.462312	1.29105	0.766274
UBE2C	finngen_R11_M13_RHEUMA	Rheumatoid arthritis || id:finngen_R11_M13_RHEUMA	UBE2C++UBE2C_NA_UBE2C	Wald ratio	1	0.0539703	0.0918509	0.55681	-0.126057	0.233998	1.05545	0.881564	1.26364	0.882579
UBASH3B	finngen_R11_M13_RHEUMA	Rheumatoid arthritis || id:finngen_R11_M13_RHEUMA	UBASH3B++UBS3B_NA_UBS3B	Inverse variance weighted	2	0.0887024	0.0992236	0.371341	-0.105776	0.283181	1.09276	0.899626	1.32734	0.990373
UBASH3B	finngen_R11_M13_RHEUMA	Rheumatoid arthritis || id:finngen_R11_M13_RHEUMA	UBASH3B++UBS3B_NA_UBS3B	Maximum likelihood	2	0.0887433	0.0994086	0.372011	-0.106098	0.283584	1.0928	0.899337	1.32788	0.882878
TNFAIP8	finngen_R11_M13_RHEUMA	Rheumatoid arthritis || id:finngen_R11_M13_RHEUMA	TNFAIP8++TFIP8_NA_TFIP8	Inverse variance weighted	2	0.0509651	0.182348	0.779866	-0.306437	0.408367	1.05229	0.736065	1.50436	0.990373
TNFAIP8	finngen_R11_M13_RHEUMA	Rheumatoid arthritis || id:finngen_R11_M13_RHEUMA	TNFAIP8++TFIP8_NA_TFIP8	Maximum likelihood	2	0.0517371	0.0774413	0.504082	-0.100048	0.203522	1.0531	0.904794	1.22571	0.9072
CCT5	finngen_R11_M13_RHEUMA	Rheumatoid arthritis || id:finngen_R11_M13_RHEUMA	CCT5++TCP_1_epsilon	Wald ratio	1	0.401135	0.244345	0.100657	-0.0777811	0.880051	1.49352	0.925167	2.41102	0.541774
ARL3	finngen_R11_M13_RHEUMA	Rheumatoid arthritis || id:finngen_R11_M13_RHEUMA	ARL3++ARL3_NA_ARL3	Inverse variance weighted	2	-0.0134541	0.086289	0.876097	-0.18258	0.155672	0.986636	0.833118	1.16844	0.992378
ARL3	finngen_R11_M13_RHEUMA	Rheumatoid arthritis || id:finngen_R11_M13_RHEUMA	ARL3++ARL3_NA_ARL3	Maximum likelihood	2	-0.0134777	0.0863738	0.876002	-0.18277	0.155815	0.986613	0.832959	1.16861	0.975865
TRIM3	finngen_R11_M13_RHEUMA	Rheumatoid arthritis || id:finngen_R11_M13_RHEUMA	TRIM3++TRIM3_NA_TRIM3	Wald ratio	1	-0.0747658	0.136706	0.584441	-0.34271	0.193178	0.927961	0.709844	1.2131	0.885657
MTHFD1	finngen_R11_M13_RHEUMA	Rheumatoid arthritis || id:finngen_R11_M13_RHEUMA	MTHFD1++C1TC_NA_C1TC	Inverse variance weighted	3	-0.213069	0.106079	0.0445821	-0.420984	-0.00515298	0.808101	0.6564	0.99486	0.682376
MTHFD1	finngen_R11_M13_RHEUMA	Rheumatoid arthritis || id:finngen_R11_M13_RHEUMA	MTHFD1++C1TC_NA_C1TC	MR Egger	3	-1.60661	1.56261	0.491163	-4.66933	1.45611	0.200566	0.0093785	4.28925	0.999671
MTHFD1	finngen_R11_M13_RHEUMA	Rheumatoid arthritis || id:finngen_R11_M13_RHEUMA	MTHFD1++C1TC_NA_C1TC	Weighted median	3	-0.189809	0.112644	0.091982	-0.410592	0.0309733	0.827117	0.663257	1.03146	0.674722
MTHFD1	finngen_R11_M13_RHEUMA	Rheumatoid arthritis || id:finngen_R11_M13_RHEUMA	MTHFD1++C1TC_NA_C1TC	Weighted mode	3	-0.183347	0.126768	0.285004	-0.431813	0.0651198	0.83248	0.649331	1.06729	0.976532
MTHFD1	finngen_R11_M13_RHEUMA	Rheumatoid arthritis || id:finngen_R11_M13_RHEUMA	MTHFD1++C1TC_NA_C1TC	Maximum likelihood	3	-0.213778	0.107426	0.0465905	-0.424332	-0.00322316	0.807528	0.654206	0.996782	0.502451
MTHFD1	finngen_R11_M13_RHEUMA	Rheumatoid arthritis || id:finngen_R11_M13_RHEUMA	MTHFD1++C1TC_NA_C1TC	Simple mode	3	-0.197117	0.149297	0.317579	-0.489739	0.0955043	0.821094	0.612786	1.10021	0.994896
GCA	finngen_R11_M13_RHEUMA	Rheumatoid arthritis || id:finngen_R11_M13_RHEUMA	GCA++GRAN_NA_GRAN	Inverse variance weighted	2	-0.0856236	0.0504935	0.0899361	-0.184591	0.0133437	0.91794	0.831444	1.01343	0.778628
GCA	finngen_R11_M13_RHEUMA	Rheumatoid arthritis || id:finngen_R11_M13_RHEUMA	GCA++GRAN_NA_GRAN	Maximum likelihood	2	-0.0857242	0.0434811	0.0486635	-0.170947	-0.000501267	0.917847	0.842866	0.999499	0.506887
PSMB1	finngen_R11_M13_RHEUMA	Rheumatoid arthritis || id:finngen_R11_M13_RHEUMA	PSMB1++PSB1_NA_PSB1	Inverse variance weighted	2	-0.0352354	0.0399923	0.378289	-0.11362	0.0431496	0.965378	0.892597	1.04409	0.990373
PSMB1	finngen_R11_M13_RHEUMA	Rheumatoid arthritis || id:finngen_R11_M13_RHEUMA	PSMB1++PSB1_NA_PSB1	Maximum likelihood	2	-0.0352415	0.0400028	0.378331	-0.113647	0.0431639	0.965372	0.892573	1.04411	0.886332
NRBP1	finngen_R11_M13_RHEUMA	Rheumatoid arthritis || id:finngen_R11_M13_RHEUMA	NRBP1++NRBP_NA_NRBP	Wald ratio	1	0.450862	0.255417	0.0775302	-0.0497553	0.951479	1.56966	0.951462	2.58954	0.541774
PTPN9	finngen_R11_M13_RHEUMA	Rheumatoid arthritis || id:finngen_R11_M13_RHEUMA	PTPN9++PTN9_NA_PTN9	Wald ratio	1	0.100419	0.192131	0.601212	-0.276158	0.476996	1.10563	0.758693	1.61123	0.885657
CRAT	finngen_R11_M13_RHEUMA	Rheumatoid arthritis || id:finngen_R11_M13_RHEUMA	CRAT++CACP_NA_CACP	Wald ratio	1	0.445959	0.159509	0.00517688	0.133321	0.758597	1.56199	1.14262	2.13528	0.18022
INPP5B	finngen_R11_M13_RHEUMA	Rheumatoid arthritis || id:finngen_R11_M13_RHEUMA	INPP5B++I5P2_NA_I5P2	Inverse variance weighted	2	-0.0104577	0.0745099	0.888381	-0.156497	0.135582	0.989597	0.855134	1.1452	0.992378
INPP5B	finngen_R11_M13_RHEUMA	Rheumatoid arthritis || id:finngen_R11_M13_RHEUMA	INPP5B++I5P2_NA_I5P2	Maximum likelihood	2	-0.0104642	0.0745434	0.888362	-0.156569	0.135641	0.98959	0.855072	1.14527	0.976032
ARRB1	finngen_R11_M13_RHEUMA	Rheumatoid arthritis || id:finngen_R11_M13_RHEUMA	ARRB1++ARRB1_NA_ARRB1	Wald ratio	1	-0.0587788	0.207369	0.776832	-0.465222	0.347664	0.942915	0.627996	1.41576	0.94274
RPE	finngen_R11_M13_RHEUMA	Rheumatoid arthritis || id:finngen_R11_M13_RHEUMA	RPE++RPE_NA_RPE	Wald ratio	1	-0.111198	0.162118	0.492768	-0.428949	0.206552	0.894761	0.651193	1.22943	0.853181
KLC1	finngen_R11_M13_RHEUMA	Rheumatoid arthritis || id:finngen_R11_M13_RHEUMA	KLC1++KLC1_NA_KLC1	Wald ratio	1	0.0116207	0.140188	0.933937	-0.263149	0.28639	1.01169	0.768628	1.33161	0.97599
ECH1	finngen_R11_M13_RHEUMA	Rheumatoid arthritis || id:finngen_R11_M13_RHEUMA	ECH1++ECH1_NA_ECH1	Inverse variance weighted	2	0.0686727	0.0455522	0.131667	-0.0206096	0.157955	1.07109	0.979601	1.17111	0.838508
ECH1	finngen_R11_M13_RHEUMA	Rheumatoid arthritis || id:finngen_R11_M13_RHEUMA	ECH1++ECH1_NA_ECH1	Maximum likelihood	2	0.0686784	0.0456025	0.132061	-0.0207025	0.158059	1.07109	0.97951	1.17124	0.663866
FLII	finngen_R11_M13_RHEUMA	Rheumatoid arthritis || id:finngen_R11_M13_RHEUMA	FLII++FLII_NA_FLII	Wald ratio	1	-0.0339446	0.164354	0.836374	-0.356078	0.288189	0.966625	0.700418	1.33401	0.944479
HOMER2	finngen_R11_M13_RHEUMA	Rheumatoid arthritis || id:finngen_R11_M13_RHEUMA	HOMER2++HOME2_NA_HOME2	Wald ratio	1	0.248225	0.191932	0.19591	-0.127962	0.624411	1.28175	0.879886	1.86715	0.689428
MPST	finngen_R11_M13_RHEUMA	Rheumatoid arthritis || id:finngen_R11_M13_RHEUMA	MPST++THTM_NA_THTM	Inverse variance weighted	2	-0.0170279	0.179931	0.924604	-0.369693	0.335637	0.983116	0.690947	1.39883	0.996035
MPST	finngen_R11_M13_RHEUMA	Rheumatoid arthritis || id:finngen_R11_M13_RHEUMA	MPST++THTM_NA_THTM	Maximum likelihood	2	-0.0171518	0.134704	0.89868	-0.281172	0.246869	0.982994	0.754898	1.28001	0.978155
DECR1	finngen_R11_M13_RHEUMA	Rheumatoid arthritis || id:finngen_R11_M13_RHEUMA	DECR1++DECR_NA_DECR	Inverse variance weighted	2	0.149891	0.161232	0.352548	-0.166124	0.465906	1.16171	0.846941	1.59346	0.990373
DECR1	finngen_R11_M13_RHEUMA	Rheumatoid arthritis || id:finngen_R11_M13_RHEUMA	DECR1++DECR_NA_DECR	Maximum likelihood	2	0.150646	0.16273	0.35458	-0.168304	0.469596	1.16258	0.845097	1.59935	0.870981
ARPC1B	finngen_R11_M13_RHEUMA	Rheumatoid arthritis || id:finngen_R11_M13_RHEUMA	ARPC1B++ARC1B_NA_ARC1B	Wald ratio	1	0.331946	0.126655	0.00877098	0.0837008	0.58019	1.39368	1.0873	1.78638	0.193536
PIP4K2A	finngen_R11_M13_RHEUMA	Rheumatoid arthritis || id:finngen_R11_M13_RHEUMA	PIP4K2A++PI42A_NA_PI42A	Wald ratio	1	0.148227	0.114841	0.196802	-0.0768614	0.373316	1.15978	0.926018	1.45254	0.689428
NEK7	finngen_R11_M13_RHEUMA	Rheumatoid arthritis || id:finngen_R11_M13_RHEUMA	NEK7++NEK7_NA_NEK7	Wald ratio	1	0.0400594	0.121797	0.742228	-0.198662	0.278781	1.04087	0.819827	1.32152	0.935106
AP1G2	finngen_R11_M13_RHEUMA	Rheumatoid arthritis || id:finngen_R11_M13_RHEUMA	AP1G2++AP1G2_NA_AP1G2	Inverse variance weighted	3	-0.0297884	0.0506447	0.556408	-0.129052	0.0694752	0.970651	0.878928	1.07195	0.990373
AP1G2	finngen_R11_M13_RHEUMA	Rheumatoid arthritis || id:finngen_R11_M13_RHEUMA	AP1G2++AP1G2_NA_AP1G2	MR Egger	3	-0.164102	0.114453	0.38771	-0.38843	0.0602264	0.848656	0.678121	1.06208	0.999671
AP1G2	finngen_R11_M13_RHEUMA	Rheumatoid arthritis || id:finngen_R11_M13_RHEUMA	AP1G2++AP1G2_NA_AP1G2	Weighted median	3	-0.0337008	0.0530024	0.524884	-0.137586	0.0701839	0.966861	0.87146	1.07271	0.917989
AP1G2	finngen_R11_M13_RHEUMA	Rheumatoid arthritis || id:finngen_R11_M13_RHEUMA	AP1G2++AP1G2_NA_AP1G2	Weighted mode	3	-0.0380378	0.0527049	0.545442	-0.141339	0.0652637	0.962677	0.868195	1.06744	0.976532
AP1G2	finngen_R11_M13_RHEUMA	Rheumatoid arthritis || id:finngen_R11_M13_RHEUMA	AP1G2++AP1G2_NA_AP1G2	Maximum likelihood	3	-0.0298352	0.0506595	0.555905	-0.129128	0.0694575	0.970605	0.878862	1.07193	0.92239
AP1G2	finngen_R11_M13_RHEUMA	Rheumatoid arthritis || id:finngen_R11_M13_RHEUMA	AP1G2++AP1G2_NA_AP1G2	Simple mode	3	-0.0193773	0.0599699	0.777262	-0.136918	0.0981637	0.980809	0.872042	1.10314	0.994896
GPCPD1	finngen_R11_M13_RHEUMA	Rheumatoid arthritis || id:finngen_R11_M13_RHEUMA	GPCPD1++GDE5_NA_GDE5	Inverse variance weighted	2	-0.130693	0.124905	0.295404	-0.375506	0.114121	0.877487	0.686941	1.12089	0.986776
GPCPD1	finngen_R11_M13_RHEUMA	Rheumatoid arthritis || id:finngen_R11_M13_RHEUMA	GPCPD1++GDE5_NA_GDE5	Maximum likelihood	2	-0.130714	0.125406	0.297258	-0.376509	0.115081	0.877468	0.686253	1.12196	0.834962
DNAJC27	finngen_R11_M13_RHEUMA	Rheumatoid arthritis || id:finngen_R11_M13_RHEUMA	DNAJC27++DJC27_NA_DJC27	Wald ratio	1	0.230241	0.298006	0.439755	-0.35385	0.814333	1.2589	0.70198	2.25767	0.835985
IRF2	finngen_R11_M13_RHEUMA	Rheumatoid arthritis || id:finngen_R11_M13_RHEUMA	IRF2++IRF2_NA_IRF2	Wald ratio	1	-0.372566	0.331848	0.261565	-1.02299	0.277856	0.688964	0.35952	1.3203	0.722927
ACYP2	finngen_R11_M13_RHEUMA	Rheumatoid arthritis || id:finngen_R11_M13_RHEUMA	ACYP2++ACYP2_NA_ACYP2	Inverse variance weighted	2	-0.0615551	0.332072	0.852941	-0.712416	0.589306	0.940301	0.490458	1.80274	0.992378
ACYP2	finngen_R11_M13_RHEUMA	Rheumatoid arthritis || id:finngen_R11_M13_RHEUMA	ACYP2++ACYP2_NA_ACYP2	Maximum likelihood	2	-0.0630779	0.220658	0.774983	-0.495568	0.369412	0.93887	0.609225	1.44688	0.961593
EHBP1	finngen_R11_M13_RHEUMA	Rheumatoid arthritis || id:finngen_R11_M13_RHEUMA	EHBP1++EHBP1_NA_EHBP1	Wald ratio	1	-0.340685	0.303893	0.262258	-0.936315	0.254945	0.711283	0.39207	1.29039	0.722927
POLM	finngen_R11_M13_RHEUMA	Rheumatoid arthritis || id:finngen_R11_M13_RHEUMA	POLM++DPOLM_NA_DPOLM	Inverse variance weighted	3	-0.0417809	0.0768382	0.586612	-0.192384	0.108822	0.95908	0.82499	1.11496	0.990373
POLM	finngen_R11_M13_RHEUMA	Rheumatoid arthritis || id:finngen_R11_M13_RHEUMA	POLM++DPOLM_NA_DPOLM	MR Egger	3	-0.0670684	0.220697	0.812181	-0.499634	0.365497	0.935131	0.606753	1.44123	0.999671
POLM	finngen_R11_M13_RHEUMA	Rheumatoid arthritis || id:finngen_R11_M13_RHEUMA	POLM++DPOLM_NA_DPOLM	Weighted median	3	-0.0592125	0.0540853	0.273605	-0.16522	0.0467946	0.942506	0.847708	1.04791	0.879991
POLM	finngen_R11_M13_RHEUMA	Rheumatoid arthritis || id:finngen_R11_M13_RHEUMA	POLM++DPOLM_NA_DPOLM	Weighted mode	3	-0.0606803	0.053395	0.373602	-0.165335	0.0439739	0.941124	0.84761	1.04496	0.976532
POLM	finngen_R11_M13_RHEUMA	Rheumatoid arthritis || id:finngen_R11_M13_RHEUMA	POLM++DPOLM_NA_DPOLM	Maximum likelihood	3	-0.0418312	0.0520813	0.421865	-0.143911	0.0602482	0.959032	0.865965	1.0621	0.890655
POLM	finngen_R11_M13_RHEUMA	Rheumatoid arthritis || id:finngen_R11_M13_RHEUMA	POLM++DPOLM_NA_DPOLM	Simple mode	3	-0.0528765	0.072594	0.542117	-0.195161	0.0894077	0.948497	0.822702	1.09353	0.994896
CASS4	finngen_R11_M13_RHEUMA	Rheumatoid arthritis || id:finngen_R11_M13_RHEUMA	CASS4++CT032_NA_CT032	Wald ratio	1	-0.342519	0.22015	0.119744	-0.774012	0.088974	0.70998	0.461159	1.09305	0.569588
IFI16	finngen_R11_M13_RHEUMA	Rheumatoid arthritis || id:finngen_R11_M13_RHEUMA	IFI16++IP16_NA_IP16	Wald ratio	1	0.353628	0.243841	0.146992	-0.1243	0.831556	1.42422	0.883115	2.29689	0.623194
ALDH3B1	finngen_R11_M13_RHEUMA	Rheumatoid arthritis || id:finngen_R11_M13_RHEUMA	ALDH3B1++AL3B1_NA_AL3B1	Wald ratio	1	0.0203956	0.100414	0.839046	-0.176416	0.217207	1.0206	0.838269	1.2426	0.944479
KRT20	finngen_R11_M13_RHEUMA	Rheumatoid arthritis || id:finngen_R11_M13_RHEUMA	KRT20++Keratin_20	Inverse variance weighted	2	-0.163948	0.17366	0.34513	-0.504321	0.176425	0.848786	0.603915	1.19294	0.990373
KRT20	finngen_R11_M13_RHEUMA	Rheumatoid arthritis || id:finngen_R11_M13_RHEUMA	KRT20++Keratin_20	Maximum likelihood	2	-0.163948	0.1746	0.347734	-0.506164	0.178268	0.848786	0.602804	1.19515	0.870981
MAP3K3	finngen_R11_M13_RHEUMA	Rheumatoid arthritis || id:finngen_R11_M13_RHEUMA	MAP3K3++MAP3K3_NA_MAP3K3	Wald ratio	1	0.18587	0.268362	0.488555	-0.34012	0.711861	1.20427	0.711685	2.03778	0.853181
TSG101	finngen_R11_M13_RHEUMA	Rheumatoid arthritis || id:finngen_R11_M13_RHEUMA	TSG101++TS101_NA_TS101	Wald ratio	1	0.137462	0.0839287	0.101455	-0.0270386	0.301962	1.14736	0.973324	1.35251	0.541774
RFK	finngen_R11_M13_RHEUMA	Rheumatoid arthritis || id:finngen_R11_M13_RHEUMA	RFK++RIFK_NA_RIFK	Inverse variance weighted	2	-0.0576426	0.183949	0.754005	-0.418182	0.302897	0.943987	0.658242	1.35378	0.990373
RFK	finngen_R11_M13_RHEUMA	Rheumatoid arthritis || id:finngen_R11_M13_RHEUMA	RFK++RIFK_NA_RIFK	Maximum likelihood	2	-0.0583793	0.107702	0.587788	-0.269476	0.152717	0.943292	0.76378	1.165	0.925963
GMFG	finngen_R11_M13_RHEUMA	Rheumatoid arthritis || id:finngen_R11_M13_RHEUMA	GMFG++GMFG_NA_GMFG	Wald ratio	1	1.04923	0.799909	0.189626	-0.518593	2.61705	2.85545	0.595358	13.6953	0.685856
CCS	finngen_R11_M13_RHEUMA	Rheumatoid arthritis || id:finngen_R11_M13_RHEUMA	CCS++CCS_NA_CCS	Wald ratio	1	0.0335657	0.108988	0.7581	-0.18005	0.247181	1.03414	0.835228	1.28041	0.94077
BTC	finngen_R11_M13_RHEUMA	Rheumatoid arthritis || id:finngen_R11_M13_RHEUMA	BTC++BTC_NA_BTC	Inverse variance weighted	2	-0.027643	0.0772557	0.720484	-0.179064	0.123778	0.972736	0.836052	1.13176	0.990373
BTC	finngen_R11_M13_RHEUMA	Rheumatoid arthritis || id:finngen_R11_M13_RHEUMA	BTC++BTC_NA_BTC	Maximum likelihood	2	-0.0276606	0.0773135	0.720514	-0.179195	0.123874	0.972718	0.835943	1.13187	0.952486
RSPO3	finngen_R11_M13_RHEUMA	Rheumatoid arthritis || id:finngen_R11_M13_RHEUMA	RSPO3++RSPO3_NA_RSPO3	Inverse variance weighted	2	-0.016026	0.111632	0.885847	-0.234824	0.202772	0.984102	0.79071	1.22479	0.992378
RSPO3	finngen_R11_M13_RHEUMA	Rheumatoid arthritis || id:finngen_R11_M13_RHEUMA	RSPO3++RSPO3_NA_RSPO3	Maximum likelihood	2	-0.0161168	0.0542058	0.766218	-0.12236	0.0901266	0.984012	0.88483	1.09431	0.961123
FAM3D	finngen_R11_M13_RHEUMA	Rheumatoid arthritis || id:finngen_R11_M13_RHEUMA	FAM3D++FAM3D_NA_FAM3D	Inverse variance weighted	4	-0.0370633	0.037027	0.316837	-0.109636	0.0355097	0.963615	0.89616	1.03615	0.986776
FAM3D	finngen_R11_M13_RHEUMA	Rheumatoid arthritis || id:finngen_R11_M13_RHEUMA	FAM3D++FAM3D_NA_FAM3D	MR Egger	4	-0.0576421	0.05468	0.402357	-0.164815	0.0495307	0.943988	0.848051	1.05078	0.999671
FAM3D	finngen_R11_M13_RHEUMA	Rheumatoid arthritis || id:finngen_R11_M13_RHEUMA	FAM3D++FAM3D_NA_FAM3D	Weighted median	4	-0.0484545	0.0393269	0.217913	-0.125535	0.0286262	0.952701	0.882025	1.02904	0.834332
FAM3D	finngen_R11_M13_RHEUMA	Rheumatoid arthritis || id:finngen_R11_M13_RHEUMA	FAM3D++FAM3D_NA_FAM3D	Weighted mode	4	-0.0496602	0.0402271	0.304899	-0.128505	0.0291849	0.951553	0.879409	1.02961	0.976532
FAM3D	finngen_R11_M13_RHEUMA	Rheumatoid arthritis || id:finngen_R11_M13_RHEUMA	FAM3D++FAM3D_NA_FAM3D	Maximum likelihood	4	-0.0371349	0.0370721	0.316492	-0.109796	0.0355265	0.963546	0.896017	1.03617	0.844555
FAM3D	finngen_R11_M13_RHEUMA	Rheumatoid arthritis || id:finngen_R11_M13_RHEUMA	FAM3D++FAM3D_NA_FAM3D	Simple mode	4	-0.0774788	0.0692848	0.34493	-0.213277	0.0583193	0.925447	0.807932	1.06005	0.994896
LYPD3	finngen_R11_M13_RHEUMA	Rheumatoid arthritis || id:finngen_R11_M13_RHEUMA	LYPD3++LYPD3_NA_LYPD3	Wald ratio	1	0.113151	0.10827	0.295985	-0.0990577	0.325359	1.1198	0.90569	1.38453	0.752801
NEGR1	finngen_R11_M13_RHEUMA	Rheumatoid arthritis || id:finngen_R11_M13_RHEUMA	NEGR1++NEGR1_NA_NEGR1	Inverse variance weighted	2	-0.0250354	0.0882641	0.776685	-0.198033	0.147962	0.975275	0.820343	1.15947	0.990373
NEGR1	finngen_R11_M13_RHEUMA	Rheumatoid arthritis || id:finngen_R11_M13_RHEUMA	NEGR1++NEGR1_NA_NEGR1	Maximum likelihood	2	-0.025076	0.088342	0.776524	-0.198226	0.148074	0.975236	0.820184	1.1596	0.961593
FSTL1	finngen_R11_M13_RHEUMA	Rheumatoid arthritis || id:finngen_R11_M13_RHEUMA	FSTL1++FSTL1_NA_FSTL1	Wald ratio	1	-0.052833	0.0823796	0.521304	-0.214297	0.108631	0.948538	0.807109	1.11475	0.859133
SPP1	finngen_R11_M13_RHEUMA	Rheumatoid arthritis || id:finngen_R11_M13_RHEUMA	SPP1++Osteopontin_NA_Osteopontin	Inverse variance weighted	2	-0.0244281	0.0584408	0.675949	-0.138972	0.0901159	0.975868	0.870252	1.0943	0.990373
SPP1	finngen_R11_M13_RHEUMA	Rheumatoid arthritis || id:finngen_R11_M13_RHEUMA	SPP1++Osteopontin_NA_Osteopontin	Maximum likelihood	2	-0.0244281	0.0584588	0.676043	-0.139007	0.0901511	0.975868	0.870222	1.09434	0.93286
LUM	finngen_R11_M13_RHEUMA	Rheumatoid arthritis || id:finngen_R11_M13_RHEUMA	LUM++Lumican_NA_Lumican	Inverse variance weighted	7	0.127572	0.0512179	0.0127466	0.027185	0.227959	1.13607	1.02756	1.25603	0.404519
LUM	finngen_R11_M13_RHEUMA	Rheumatoid arthritis || id:finngen_R11_M13_RHEUMA	LUM++Lumican_NA_Lumican	MR Egger	7	0.158575	0.116269	0.230799	-0.0693118	0.386462	1.17184	0.933036	1.47176	0.999671
LUM	finngen_R11_M13_RHEUMA	Rheumatoid arthritis || id:finngen_R11_M13_RHEUMA	LUM++Lumican_NA_Lumican	Weighted median	7	0.103104	0.0649355	0.112333	-0.0241693	0.230378	1.10861	0.97612	1.25908	0.71668
LUM	finngen_R11_M13_RHEUMA	Rheumatoid arthritis || id:finngen_R11_M13_RHEUMA	LUM++Lumican_NA_Lumican	Weighted mode	7	0.0890468	0.0785902	0.300429	-0.0649901	0.243084	1.09313	0.937077	1.27518	0.976532
LUM	finngen_R11_M13_RHEUMA	Rheumatoid arthritis || id:finngen_R11_M13_RHEUMA	LUM++Lumican_NA_Lumican	Maximum likelihood	7	0.128038	0.0514096	0.0127546	0.0272753	0.228801	1.1366	1.02765	1.25709	0.28561
LUM	finngen_R11_M13_RHEUMA	Rheumatoid arthritis || id:finngen_R11_M13_RHEUMA	LUM++Lumican_NA_Lumican	Simple mode	7	0.072862	0.098051	0.485487	-0.119318	0.265042	1.07558	0.887525	1.30349	0.994896
CD177	finngen_R11_M13_RHEUMA	Rheumatoid arthritis || id:finngen_R11_M13_RHEUMA	CD177++CD177_NA_CD177	Inverse variance weighted (multiplicative random effects)	11	0.00638357	0.026586	0.810245	-0.045725	0.0584922	1.0064	0.955305	1.06024	0.992378
CD177	finngen_R11_M13_RHEUMA	Rheumatoid arthritis || id:finngen_R11_M13_RHEUMA	CD177++CD177_NA_CD177	MR Egger	11	3.40751e-05	0.0498315	0.999469	-0.0976356	0.0977037	1.00003	0.906979	1.10264	0.999671
CD177	finngen_R11_M13_RHEUMA	Rheumatoid arthritis || id:finngen_R11_M13_RHEUMA	CD177++CD177_NA_CD177	Weighted median	11	0.00365682	0.0247702	0.882635	-0.0448928	0.0522064	1.00366	0.9561	1.05359	0.982685
CD177	finngen_R11_M13_RHEUMA	Rheumatoid arthritis || id:finngen_R11_M13_RHEUMA	CD177++CD177_NA_CD177	Weighted mode	11	0.00167497	0.022868	0.943055	-0.0431463	0.0464963	1.00168	0.957771	1.04759	0.984041
CD177	finngen_R11_M13_RHEUMA	Rheumatoid arthritis || id:finngen_R11_M13_RHEUMA	CD177++CD177_NA_CD177	Maximum likelihood	11	0.00636468	0.018997	0.737598	-0.0308695	0.0435988	1.00638	0.969602	1.04456	0.952486
CD177	finngen_R11_M13_RHEUMA	Rheumatoid arthritis || id:finngen_R11_M13_RHEUMA	CD177++CD177_NA_CD177	Simple mode	11	0.147109	0.0576158	0.0287021	0.0341823	0.260036	1.15848	1.03477	1.29698	0.994896
SMOC1	finngen_R11_M13_RHEUMA	Rheumatoid arthritis || id:finngen_R11_M13_RHEUMA	SMOC1++SMOC1_NA_SMOC1	Inverse variance weighted (multiplicative random effects)	4	-0.137931	0.129174	0.285614	-0.391112	0.11525	0.871159	0.676304	1.12215	0.986776
SMOC1	finngen_R11_M13_RHEUMA	Rheumatoid arthritis || id:finngen_R11_M13_RHEUMA	SMOC1++SMOC1_NA_SMOC1	MR Egger	4	-0.117374	0.320485	0.7493	-0.745525	0.510776	0.889252	0.474485	1.66658	0.999671
SMOC1	finngen_R11_M13_RHEUMA	Rheumatoid arthritis || id:finngen_R11_M13_RHEUMA	SMOC1++SMOC1_NA_SMOC1	Weighted median	4	-0.186229	0.0802786	0.0203523	-0.343575	-0.0288833	0.830083	0.70923	0.97153	0.405107
SMOC1	finngen_R11_M13_RHEUMA	Rheumatoid arthritis || id:finngen_R11_M13_RHEUMA	SMOC1++SMOC1_NA_SMOC1	Weighted mode	4	-0.175232	0.0838492	0.127796	-0.339576	-0.0108871	0.839263	0.712072	0.989172	0.976532
SMOC1	finngen_R11_M13_RHEUMA	Rheumatoid arthritis || id:finngen_R11_M13_RHEUMA	SMOC1++SMOC1_NA_SMOC1	Maximum likelihood	4	-0.13954	0.0772793	0.0709723	-0.291007	0.0119277	0.869759	0.74751	1.012	0.533461
SMOC1	finngen_R11_M13_RHEUMA	Rheumatoid arthritis || id:finngen_R11_M13_RHEUMA	SMOC1++SMOC1_NA_SMOC1	Simple mode	4	-0.102993	0.114628	0.435137	-0.327665	0.121678	0.902133	0.720605	1.12939	0.994896
FLRT2	finngen_R11_M13_RHEUMA	Rheumatoid arthritis || id:finngen_R11_M13_RHEUMA	FLRT2++FLRT2_NA_FLRT2	Inverse variance weighted	4	0.0639462	0.0448496	0.153928	-0.023959	0.151851	1.06604	0.976326	1.16399	0.87959
FLRT2	finngen_R11_M13_RHEUMA	Rheumatoid arthritis || id:finngen_R11_M13_RHEUMA	FLRT2++FLRT2_NA_FLRT2	MR Egger	4	0.0955974	0.103175	0.451971	-0.106625	0.297819	1.10032	0.898863	1.34692	0.999671
FLRT2	finngen_R11_M13_RHEUMA	Rheumatoid arthritis || id:finngen_R11_M13_RHEUMA	FLRT2++FLRT2_NA_FLRT2	Weighted median	4	0.0861479	0.0476944	0.0708796	-0.0073331	0.179629	1.08997	0.992694	1.19677	0.605312
FLRT2	finngen_R11_M13_RHEUMA	Rheumatoid arthritis || id:finngen_R11_M13_RHEUMA	FLRT2++FLRT2_NA_FLRT2	Weighted mode	4	0.0831684	0.054885	0.226939	-0.0244063	0.190743	1.08672	0.975889	1.21015	0.976532
FLRT2	finngen_R11_M13_RHEUMA	Rheumatoid arthritis || id:finngen_R11_M13_RHEUMA	FLRT2++FLRT2_NA_FLRT2	Maximum likelihood	4	0.0640195	0.0449264	0.154161	-0.0240363	0.152075	1.06611	0.97625	1.16425	0.691196
FLRT2	finngen_R11_M13_RHEUMA	Rheumatoid arthritis || id:finngen_R11_M13_RHEUMA	FLRT2++FLRT2_NA_FLRT2	Simple mode	4	0.0745598	0.0731685	0.383214	-0.0688503	0.21797	1.07741	0.933466	1.24355	0.994896
DSC2	finngen_R11_M13_RHEUMA	Rheumatoid arthritis || id:finngen_R11_M13_RHEUMA	DSC2++DSC2_NA_DSC2	Inverse variance weighted	3	0.0885152	0.101185	0.381689	-0.109807	0.286837	1.09255	0.896007	1.33221	0.990373
DSC2	finngen_R11_M13_RHEUMA	Rheumatoid arthritis || id:finngen_R11_M13_RHEUMA	DSC2++DSC2_NA_DSC2	MR Egger	3	0.266305	0.176825	0.373155	-0.0802722	0.612881	1.30513	0.922865	1.84574	0.999671
DSC2	finngen_R11_M13_RHEUMA	Rheumatoid arthritis || id:finngen_R11_M13_RHEUMA	DSC2++DSC2_NA_DSC2	Weighted median	3	0.081827	0.0846925	0.333961	-0.0841702	0.247824	1.08527	0.919275	1.28123	0.88643
DSC2	finngen_R11_M13_RHEUMA	Rheumatoid arthritis || id:finngen_R11_M13_RHEUMA	DSC2++DSC2_NA_DSC2	Weighted mode	3	0.0854816	0.0887483	0.43708	-0.0884651	0.259428	1.08924	0.915335	1.29619	0.976532
DSC2	finngen_R11_M13_RHEUMA	Rheumatoid arthritis || id:finngen_R11_M13_RHEUMA	DSC2++DSC2_NA_DSC2	Maximum likelihood	3	0.0893076	0.0784468	0.254934	-0.0644481	0.243063	1.09342	0.937585	1.27515	0.808364
DSC2	finngen_R11_M13_RHEUMA	Rheumatoid arthritis || id:finngen_R11_M13_RHEUMA	DSC2++DSC2_NA_DSC2	Simple mode	3	0.0543189	0.145369	0.744548	-0.230605	0.339243	1.05582	0.794053	1.40388	0.994896
HK2	finngen_R11_M13_RHEUMA	Rheumatoid arthritis || id:finngen_R11_M13_RHEUMA	HK2++HXK2_NA_HXK2	Inverse variance weighted	2	-0.222523	0.163897	0.174559	-0.543761	0.0987151	0.800497	0.580561	1.10375	0.909715
HK2	finngen_R11_M13_RHEUMA	Rheumatoid arthritis || id:finngen_R11_M13_RHEUMA	HK2++HXK2_NA_HXK2	Maximum likelihood	2	-0.222634	0.165395	0.178279	-0.546808	0.101541	0.800408	0.578794	1.10687	0.723453
LTBP4	finngen_R11_M13_RHEUMA	Rheumatoid arthritis || id:finngen_R11_M13_RHEUMA	LTBP4++LTBP4_NA_LTBP4	Wald ratio	1	0.0798211	0.163954	0.626364	-0.241528	0.40117	1.08309	0.785427	1.49357	0.892288
B4GALT1	finngen_R11_M13_RHEUMA	Rheumatoid arthritis || id:finngen_R11_M13_RHEUMA	B4GALT1++B4GT1_NA_B4GT1	Inverse variance weighted	3	0.0522413	0.0619866	0.399349	-0.0692523	0.173735	1.05363	0.933091	1.18974	0.990373
B4GALT1	finngen_R11_M13_RHEUMA	Rheumatoid arthritis || id:finngen_R11_M13_RHEUMA	B4GALT1++B4GT1_NA_B4GT1	MR Egger	3	0.194	0.219292	0.538911	-0.235813	0.623812	1.2141	0.789928	1.86603	0.999671
B4GALT1	finngen_R11_M13_RHEUMA	Rheumatoid arthritis || id:finngen_R11_M13_RHEUMA	B4GALT1++B4GT1_NA_B4GT1	Weighted median	3	0.0535997	0.0629148	0.394247	-0.0697133	0.176913	1.05506	0.932661	1.19353	0.88643
B4GALT1	finngen_R11_M13_RHEUMA	Rheumatoid arthritis || id:finngen_R11_M13_RHEUMA	B4GALT1++B4GT1_NA_B4GT1	Weighted mode	3	0.0616872	0.0598753	0.411177	-0.0556684	0.179043	1.06363	0.945853	1.19607	0.976532
B4GALT1	finngen_R11_M13_RHEUMA	Rheumatoid arthritis || id:finngen_R11_M13_RHEUMA	B4GALT1++B4GT1_NA_B4GT1	Maximum likelihood	3	0.0522733	0.0620443	0.399499	-0.0693335	0.17388	1.05366	0.933015	1.18991	0.890655
B4GALT1	finngen_R11_M13_RHEUMA	Rheumatoid arthritis || id:finngen_R11_M13_RHEUMA	B4GALT1++B4GT1_NA_B4GT1	Simple mode	3	0.0968663	0.131843	0.538985	-0.161546	0.355279	1.10171	0.850827	1.42658	0.994896
FH	finngen_R11_M13_RHEUMA	Rheumatoid arthritis || id:finngen_R11_M13_RHEUMA	FH++FUMH_NA_FUMH	Wald ratio	1	-0.0014208	0.0972783	0.988347	-0.192086	0.189245	0.99858	0.825236	1.20834	0.997299
PCSK1	finngen_R11_M13_RHEUMA	Rheumatoid arthritis || id:finngen_R11_M13_RHEUMA	PCSK1++NEC1_NA_NEC1	Inverse variance weighted	8	-0.012226	0.0310494	0.693759	-0.0730828	0.0486309	0.987848	0.929524	1.04983	0.990373
PCSK1	finngen_R11_M13_RHEUMA	Rheumatoid arthritis || id:finngen_R11_M13_RHEUMA	PCSK1++NEC1_NA_NEC1	MR Egger	8	-0.148675	0.080049	0.112644	-0.305571	0.00822086	0.861849	0.736702	1.00825	0.999671
PCSK1	finngen_R11_M13_RHEUMA	Rheumatoid arthritis || id:finngen_R11_M13_RHEUMA	PCSK1++NEC1_NA_NEC1	Weighted median	8	-0.0224789	0.0335266	0.502553	-0.088191	0.0432333	0.977772	0.915586	1.04418	0.912537
PCSK1	finngen_R11_M13_RHEUMA	Rheumatoid arthritis || id:finngen_R11_M13_RHEUMA	PCSK1++NEC1_NA_NEC1	Weighted mode	8	-0.0259292	0.0367893	0.503701	-0.0980363	0.0461779	0.974404	0.906616	1.04726	0.976532
PCSK1	finngen_R11_M13_RHEUMA	Rheumatoid arthritis || id:finngen_R11_M13_RHEUMA	PCSK1++NEC1_NA_NEC1	Maximum likelihood	8	-0.0122753	0.0284146	0.665737	-0.0679678	0.0434173	0.9878	0.934291	1.04437	0.93286
PCSK1	finngen_R11_M13_RHEUMA	Rheumatoid arthritis || id:finngen_R11_M13_RHEUMA	PCSK1++NEC1_NA_NEC1	Simple mode	8	-0.113497	0.0668831	0.13352	-0.244588	0.0175936	0.892707	0.783027	1.01775	0.994896
SPINK2	finngen_R11_M13_RHEUMA	Rheumatoid arthritis || id:finngen_R11_M13_RHEUMA	SPINK2++ISK2_NA_ISK2	Inverse variance weighted	4	0.0318983	0.0475171	0.502029	-0.0612353	0.125032	1.03241	0.940602	1.13318	0.990373
SPINK2	finngen_R11_M13_RHEUMA	Rheumatoid arthritis || id:finngen_R11_M13_RHEUMA	SPINK2++ISK2_NA_ISK2	MR Egger	4	0.0352955	0.0684342	0.657378	-0.0988356	0.169427	1.03593	0.905892	1.18463	0.999671
SPINK2	finngen_R11_M13_RHEUMA	Rheumatoid arthritis || id:finngen_R11_M13_RHEUMA	SPINK2++ISK2_NA_ISK2	Weighted median	4	0.0327386	0.0504879	0.516698	-0.0662177	0.131695	1.03328	0.935927	1.14076	0.912537
SPINK2	finngen_R11_M13_RHEUMA	Rheumatoid arthritis || id:finngen_R11_M13_RHEUMA	SPINK2++ISK2_NA_ISK2	Weighted mode	4	0.0352639	0.054228	0.561864	-0.0710229	0.141551	1.03589	0.931441	1.15206	0.976532
SPINK2	finngen_R11_M13_RHEUMA	Rheumatoid arthritis || id:finngen_R11_M13_RHEUMA	SPINK2++ISK2_NA_ISK2	Maximum likelihood	4	0.0319552	0.0475833	0.501861	-0.0613081	0.125219	1.03247	0.940533	1.1334	0.9072
SPINK2	finngen_R11_M13_RHEUMA	Rheumatoid arthritis || id:finngen_R11_M13_RHEUMA	SPINK2++ISK2_NA_ISK2	Simple mode	4	0.00596518	0.0782637	0.944043	-0.147432	0.159362	1.00598	0.862921	1.17276	0.994896
PARVA	finngen_R11_M13_RHEUMA	Rheumatoid arthritis || id:finngen_R11_M13_RHEUMA	PARVA++PARVA_NA_PARVA	Inverse variance weighted	2	-0.262292	0.159493	0.100067	-0.574899	0.0503152	0.769286	0.562762	1.0516	0.789257
PARVA	finngen_R11_M13_RHEUMA	Rheumatoid arthritis || id:finngen_R11_M13_RHEUMA	PARVA++PARVA_NA_PARVA	Maximum likelihood	2	-0.262164	0.160756	0.102927	-0.577246	0.0529169	0.769385	0.561443	1.05434	0.613211
CHRD	finngen_R11_M13_RHEUMA	Rheumatoid arthritis || id:finngen_R11_M13_RHEUMA	CHRD++CHRD_NA_CHRD	Wald ratio	1	0.173043	0.293138	0.55498	-0.401506	0.747593	1.18892	0.669311	2.11191	0.882579
SF3B4	finngen_R11_M13_RHEUMA	Rheumatoid arthritis || id:finngen_R11_M13_RHEUMA	SF3B4++SF3B4_NA_SF3B4	Wald ratio	1	-0.233699	0.31517	0.458389	-0.851432	0.384034	0.7916	0.426803	1.4682	0.853181
USP8	finngen_R11_M13_RHEUMA	Rheumatoid arthritis || id:finngen_R11_M13_RHEUMA	USP8++UBP8_NA_UBP8	Wald ratio	1	0.557451	0.2091	0.00767707	0.147615	0.967288	1.74622	1.15907	2.6308	0.193536
CHAD	finngen_R11_M13_RHEUMA	Rheumatoid arthritis || id:finngen_R11_M13_RHEUMA	CHAD++CHAD_NA_CHAD	Wald ratio	1	-0.508157	0.267499	0.0574777	-1.03246	0.0161408	0.601603	0.356131	1.01627	0.455938
RCAN1	finngen_R11_M13_RHEUMA	Rheumatoid arthritis || id:finngen_R11_M13_RHEUMA	RCAN1++CCP1_NA_CCP1	Wald ratio	1	-0.12621	0.241523	0.601279	-0.599595	0.347174	0.881429	0.549034	1.41506	0.885657
ITPKA	finngen_R11_M13_RHEUMA	Rheumatoid arthritis || id:finngen_R11_M13_RHEUMA	ITPKA++IP3KA_NA_IP3KA	Wald ratio	1	0.218242	0.17662	0.216585	-0.127932	0.564416	1.24389	0.879913	1.75842	0.722258
TCEA2	finngen_R11_M13_RHEUMA	Rheumatoid arthritis || id:finngen_R11_M13_RHEUMA	TCEA2++TCEA2_NA_TCEA2	Wald ratio	1	0.315407	0.0916752	0.000580678	0.135723	0.49509	1.37082	1.14537	1.64065	0.0646876
ARFIP1	finngen_R11_M13_RHEUMA	Rheumatoid arthritis || id:finngen_R11_M13_RHEUMA	ARFIP1++ARFP1_NA_ARFP1	Inverse variance weighted	2	-0.0291478	0.0921514	0.751772	-0.209765	0.151469	0.971273	0.810775	1.16354	0.990373
ARFIP1	finngen_R11_M13_RHEUMA	Rheumatoid arthritis || id:finngen_R11_M13_RHEUMA	ARFIP1++ARFP1_NA_ARFP1	Maximum likelihood	2	-0.0291953	0.0545144	0.592268	-0.136044	0.077653	0.971227	0.872805	1.08075	0.925963
ARHGEF25	finngen_R11_M13_RHEUMA	Rheumatoid arthritis || id:finngen_R11_M13_RHEUMA	ARHGEF25++ARHGP_NA_ARHGP	Inverse variance weighted	2	0.222256	0.10131	0.0282486	0.023688	0.420824	1.24889	1.02397	1.52322	0.540282
ARHGEF25	finngen_R11_M13_RHEUMA	Rheumatoid arthritis || id:finngen_R11_M13_RHEUMA	ARHGEF25++ARHGP_NA_ARHGP	Maximum likelihood	2	0.222557	0.102335	0.0296462	0.0219802	0.423134	1.24927	1.02222	1.52674	0.395282
MYOM2	finngen_R11_M13_RHEUMA	Rheumatoid arthritis || id:finngen_R11_M13_RHEUMA	MYOM2++MYOM2_NA_MYOM2	Inverse variance weighted	3	0.10551	0.134511	0.432805	-0.158131	0.369152	1.11128	0.853738	1.44651	0.990373
MYOM2	finngen_R11_M13_RHEUMA	Rheumatoid arthritis || id:finngen_R11_M13_RHEUMA	MYOM2++MYOM2_NA_MYOM2	MR Egger	3	0.26307	0.437273	0.655203	-0.593986	1.12013	1.30092	0.552122	3.06524	0.999671
MYOM2	finngen_R11_M13_RHEUMA	Rheumatoid arthritis || id:finngen_R11_M13_RHEUMA	MYOM2++MYOM2_NA_MYOM2	Weighted median	3	0.172038	0.162927	0.291003	-0.147298	0.491375	1.18772	0.863036	1.63456	0.88365
MYOM2	finngen_R11_M13_RHEUMA	Rheumatoid arthritis || id:finngen_R11_M13_RHEUMA	MYOM2++MYOM2_NA_MYOM2	Weighted mode	3	0.192966	0.181748	0.399616	-0.163261	0.549193	1.21284	0.84937	1.73185	0.976532
MYOM2	finngen_R11_M13_RHEUMA	Rheumatoid arthritis || id:finngen_R11_M13_RHEUMA	MYOM2++MYOM2_NA_MYOM2	Maximum likelihood	3	0.10637	0.135554	0.432627	-0.159316	0.372056	1.11223	0.852727	1.45071	0.891932
MYOM2	finngen_R11_M13_RHEUMA	Rheumatoid arthritis || id:finngen_R11_M13_RHEUMA	MYOM2++MYOM2_NA_MYOM2	Simple mode	3	0.188558	0.199083	0.443543	-0.201645	0.578761	1.20751	0.817385	1.78383	0.994896
POLI	finngen_R11_M13_RHEUMA	Rheumatoid arthritis || id:finngen_R11_M13_RHEUMA	POLI++POLI_NA_POLI	Wald ratio	1	0.0421326	0.161445	0.794115	-0.274301	0.358566	1.04303	0.760104	1.43128	0.94274
EIF1AD	finngen_R11_M13_RHEUMA	Rheumatoid arthritis || id:finngen_R11_M13_RHEUMA	EIF1AD++EIF1A_NA_EIF1A	Inverse variance weighted	4	0.0431602	0.0538169	0.422564	-0.0623209	0.148641	1.04411	0.939581	1.16026	0.990373
EIF1AD	finngen_R11_M13_RHEUMA	Rheumatoid arthritis || id:finngen_R11_M13_RHEUMA	EIF1AD++EIF1A_NA_EIF1A	MR Egger	4	0.182165	0.234324	0.518276	-0.277109	0.64144	1.19981	0.757972	1.89921	0.999671
EIF1AD	finngen_R11_M13_RHEUMA	Rheumatoid arthritis || id:finngen_R11_M13_RHEUMA	EIF1AD++EIF1A_NA_EIF1A	Weighted median	4	0.0501213	0.0537765	0.351321	-0.0552807	0.155523	1.0514	0.94622	1.16827	0.88643
EIF1AD	finngen_R11_M13_RHEUMA	Rheumatoid arthritis || id:finngen_R11_M13_RHEUMA	EIF1AD++EIF1A_NA_EIF1A	Weighted mode	4	0.0520517	0.0566381	0.425859	-0.058959	0.163062	1.05343	0.942745	1.17711	0.976532
EIF1AD	finngen_R11_M13_RHEUMA	Rheumatoid arthritis || id:finngen_R11_M13_RHEUMA	EIF1AD++EIF1A_NA_EIF1A	Maximum likelihood	4	0.0432218	0.0539472	0.423024	-0.0625148	0.148958	1.04417	0.939399	1.16062	0.890655
EIF1AD	finngen_R11_M13_RHEUMA	Rheumatoid arthritis || id:finngen_R11_M13_RHEUMA	EIF1AD++EIF1A_NA_EIF1A	Simple mode	4	0.0724697	0.0894283	0.477046	-0.10281	0.247749	1.07516	0.902299	1.28114	0.994896
SWAP70	finngen_R11_M13_RHEUMA	Rheumatoid arthritis || id:finngen_R11_M13_RHEUMA	SWAP70++SWP70_NA_SWP70	Inverse variance weighted	4	-0.0340206	0.0299911	0.256644	-0.0928032	0.0247619	0.966552	0.911373	1.02507	0.970768
SWAP70	finngen_R11_M13_RHEUMA	Rheumatoid arthritis || id:finngen_R11_M13_RHEUMA	SWAP70++SWP70_NA_SWP70	MR Egger	4	-0.000374037	0.0558109	0.995261	-0.109763	0.109015	0.999626	0.896046	1.11518	0.999671
SWAP70	finngen_R11_M13_RHEUMA	Rheumatoid arthritis || id:finngen_R11_M13_RHEUMA	SWAP70++SWP70_NA_SWP70	Weighted median	4	-0.0301802	0.0308152	0.327387	-0.0905781	0.0302177	0.970271	0.913403	1.03068	0.88643
SWAP70	finngen_R11_M13_RHEUMA	Rheumatoid arthritis || id:finngen_R11_M13_RHEUMA	SWAP70++SWP70_NA_SWP70	Weighted mode	4	-0.030483	0.0307325	0.394372	-0.0907187	0.0297526	0.969977	0.913275	1.0302	0.976532
SWAP70	finngen_R11_M13_RHEUMA	Rheumatoid arthritis || id:finngen_R11_M13_RHEUMA	SWAP70++SWP70_NA_SWP70	Maximum likelihood	4	-0.0340278	0.0299998	0.256683	-0.0928274	0.0247719	0.966545	0.911351	1.02508	0.808464
SWAP70	finngen_R11_M13_RHEUMA	Rheumatoid arthritis || id:finngen_R11_M13_RHEUMA	SWAP70++SWP70_NA_SWP70	Simple mode	4	-0.0406588	0.0434595	0.418517	-0.125839	0.0445218	0.960157	0.881756	1.04553	0.994896
ABLIM3	finngen_R11_M13_RHEUMA	Rheumatoid arthritis || id:finngen_R11_M13_RHEUMA	ABLIM3++ABLM3_NA_ABLM3	Wald ratio	1	-0.033414	0.157367	0.831849	-0.341854	0.275026	0.967138	0.710452	1.31656	0.944479
UAP1	finngen_R11_M13_RHEUMA	Rheumatoid arthritis || id:finngen_R11_M13_RHEUMA	UAP1++Sperm_associated_antigen_2	Wald ratio	1	0.388826	0.227178	0.0869806	-0.0564437	0.834095	1.47525	0.94512	2.30273	0.541774
REXO2	finngen_R11_M13_RHEUMA	Rheumatoid arthritis || id:finngen_R11_M13_RHEUMA	REXO2++ORN_NA_ORN	Wald ratio	1	-0.26827	0.128567	0.0369223	-0.520261	-0.0162794	0.764701	0.594365	0.983852	0.381769
RAB31	finngen_R11_M13_RHEUMA	Rheumatoid arthritis || id:finngen_R11_M13_RHEUMA	RAB31++RAB31_NA_RAB31	Inverse variance weighted	3	0.108258	0.0917466	0.238015	-0.0715659	0.288081	1.11433	0.930935	1.33387	0.952062
RAB31	finngen_R11_M13_RHEUMA	Rheumatoid arthritis || id:finngen_R11_M13_RHEUMA	RAB31++RAB31_NA_RAB31	MR Egger	3	0.15018	0.316522	0.717968	-0.470202	0.770562	1.16204	0.624876	2.16098	0.999671
RAB31	finngen_R11_M13_RHEUMA	Rheumatoid arthritis || id:finngen_R11_M13_RHEUMA	RAB31++RAB31_NA_RAB31	Weighted median	3	0.111748	0.0926437	0.227734	-0.0698333	0.29333	1.11823	0.932549	1.34089	0.840471
RAB31	finngen_R11_M13_RHEUMA	Rheumatoid arthritis || id:finngen_R11_M13_RHEUMA	RAB31++RAB31_NA_RAB31	Weighted mode	3	0.113773	0.103127	0.384917	-0.0883556	0.315902	1.1205	0.915435	1.3715	0.976532
RAB31	finngen_R11_M13_RHEUMA	Rheumatoid arthritis || id:finngen_R11_M13_RHEUMA	RAB31++RAB31_NA_RAB31	Maximum likelihood	3	0.108264	0.0919812	0.239185	-0.0720189	0.288547	1.11434	0.930513	1.33449	0.787904
RAB31	finngen_R11_M13_RHEUMA	Rheumatoid arthritis || id:finngen_R11_M13_RHEUMA	RAB31++RAB31_NA_RAB31	Simple mode	3	0.107615	0.135211	0.509548	-0.157399	0.372629	1.11362	0.854363	1.45155	0.994896
RFESD	finngen_R11_M13_RHEUMA	Rheumatoid arthritis || id:finngen_R11_M13_RHEUMA	RFESD++RFESD_NA_RFESD	Wald ratio	1	-0.724966	0.236897	0.00221144	-1.18928	-0.260648	0.484341	0.304439	0.770552	0.113803
AP2A2	finngen_R11_M13_RHEUMA	Rheumatoid arthritis || id:finngen_R11_M13_RHEUMA	AP2A2++AP2A2_NA_AP2A2	Wald ratio	1	0.411927	0.206142	0.0456876	0.00788866	0.815966	1.50972	1.00792	2.26136	0.410452
PPP2R5A	finngen_R11_M13_RHEUMA	Rheumatoid arthritis || id:finngen_R11_M13_RHEUMA	PPP2R5A++2A5A_NA_2A5A	Wald ratio	1	-0.319868	0.191671	0.0951489	-0.695543	0.0558067	0.726245	0.498803	1.05739	0.541774
NADK	finngen_R11_M13_RHEUMA	Rheumatoid arthritis || id:finngen_R11_M13_RHEUMA	NADK++NADK_NA_NADK	Wald ratio	1	-0.0516272	0.101298	0.610294	-0.250172	0.146918	0.949683	0.778667	1.15826	0.885657
ZYX	finngen_R11_M13_RHEUMA	Rheumatoid arthritis || id:finngen_R11_M13_RHEUMA	ZYX++Zyxin_NA_Zyxin	Wald ratio	1	0.487629	0.175717	0.00551892	0.143223	0.832035	1.62845	1.15399	2.29799	0.180826
IFIT3	finngen_R11_M13_RHEUMA	Rheumatoid arthritis || id:finngen_R11_M13_RHEUMA	IFIT3++CIG49_NA_CIG49	Wald ratio	1	-0.163831	0.16569	0.322772	-0.488584	0.160922	0.848886	0.613495	1.17459	0.766274
PNKP	finngen_R11_M13_RHEUMA	Rheumatoid arthritis || id:finngen_R11_M13_RHEUMA	PNKP++PNKP_NA_PNKP	Wald ratio	1	-0.0930373	0.124312	0.454207	-0.336689	0.150614	0.911159	0.714131	1.16255	0.853181
CA10	finngen_R11_M13_RHEUMA	Rheumatoid arthritis || id:finngen_R11_M13_RHEUMA	CA10++Carbonic_Anhydrase_X	Inverse variance weighted	4	-0.028355	0.0374137	0.448525	-0.101686	0.0449759	0.972043	0.903313	1.046	0.990373
CA10	finngen_R11_M13_RHEUMA	Rheumatoid arthritis || id:finngen_R11_M13_RHEUMA	CA10++Carbonic_Anhydrase_X	MR Egger	4	-0.0568677	0.0538477	0.401661	-0.162409	0.0486738	0.944719	0.850093	1.04988	0.999671
CA10	finngen_R11_M13_RHEUMA	Rheumatoid arthritis || id:finngen_R11_M13_RHEUMA	CA10++Carbonic_Anhydrase_X	Weighted median	4	-0.0371074	0.0402231	0.356248	-0.115945	0.04173	0.963573	0.890524	1.04261	0.88643
CA10	finngen_R11_M13_RHEUMA	Rheumatoid arthritis || id:finngen_R11_M13_RHEUMA	CA10++Carbonic_Anhydrase_X	Weighted mode	4	-0.0374657	0.041407	0.432261	-0.118623	0.043692	0.963227	0.888142	1.04466	0.976532
CA10	finngen_R11_M13_RHEUMA	Rheumatoid arthritis || id:finngen_R11_M13_RHEUMA	CA10++Carbonic_Anhydrase_X	Maximum likelihood	4	-0.0283958	0.0374527	0.448345	-0.101803	0.0450115	0.972004	0.903207	1.04604	0.895805
CA10	finngen_R11_M13_RHEUMA	Rheumatoid arthritis || id:finngen_R11_M13_RHEUMA	CA10++Carbonic_Anhydrase_X	Simple mode	4	-0.0301219	0.0706239	0.69849	-0.168545	0.108301	0.970327	0.844893	1.11438	0.994896
INHBB	finngen_R11_M13_RHEUMA	Rheumatoid arthritis || id:finngen_R11_M13_RHEUMA	INHBB++Inhibin_bB_chain	Inverse variance weighted	4	0.00336784	0.0359646	0.925393	-0.0671228	0.0738585	1.00337	0.93508	1.07665	0.996035
INHBB	finngen_R11_M13_RHEUMA	Rheumatoid arthritis || id:finngen_R11_M13_RHEUMA	INHBB++Inhibin_bB_chain	MR Egger	4	0.0591818	0.0596648	0.425778	-0.0577612	0.176125	1.06097	0.943875	1.19259	0.999671
INHBB	finngen_R11_M13_RHEUMA	Rheumatoid arthritis || id:finngen_R11_M13_RHEUMA	INHBB++Inhibin_bB_chain	Weighted median	4	0.00730267	0.0360455	0.839451	-0.0633464	0.0779518	1.00733	0.938618	1.08107	0.982685
INHBB	finngen_R11_M13_RHEUMA	Rheumatoid arthritis || id:finngen_R11_M13_RHEUMA	INHBB++Inhibin_bB_chain	Weighted mode	4	0.008544	0.0374967	0.834402	-0.0649494	0.0820374	1.00858	0.937115	1.0855	0.984041
INHBB	finngen_R11_M13_RHEUMA	Rheumatoid arthritis || id:finngen_R11_M13_RHEUMA	INHBB++Inhibin_bB_chain	Maximum likelihood	4	0.00337288	0.0344024	0.921899	-0.0640558	0.0708016	1.00338	0.937953	1.07337	0.986506
INHBB	finngen_R11_M13_RHEUMA	Rheumatoid arthritis || id:finngen_R11_M13_RHEUMA	INHBB++Inhibin_bB_chain	Simple mode	4	0.0196776	0.0794926	0.820465	-0.136128	0.175483	1.01987	0.872731	1.19182	0.994896
CSF1R	finngen_R11_M13_RHEUMA	Rheumatoid arthritis || id:finngen_R11_M13_RHEUMA	CSF1R++M_CSF_R	Inverse variance weighted	2	0.0457166	0.0991043	0.644585	-0.148528	0.239961	1.04678	0.861976	1.2712	0.990373
CSF1R	finngen_R11_M13_RHEUMA	Rheumatoid arthritis || id:finngen_R11_M13_RHEUMA	CSF1R++M_CSF_R	Maximum likelihood	2	0.0458334	0.0992836	0.644339	-0.148763	0.240429	1.0469	0.861774	1.2718	0.930695
GPD1	finngen_R11_M13_RHEUMA	Rheumatoid arthritis || id:finngen_R11_M13_RHEUMA	GPD1++GPDA_NA_GPDA	Wald ratio	1	-0.231265	0.234674	0.324391	-0.691227	0.228696	0.793529	0.500961	1.25696	0.766274
PAK4	finngen_R11_M13_RHEUMA	Rheumatoid arthritis || id:finngen_R11_M13_RHEUMA	PAK4++PAK4_NA_PAK4	Wald ratio	1	-0.249915	0.277352	0.367547	-0.793525	0.293694	0.778867	0.452248	1.34137	0.777232
INHBA	finngen_R11_M13_RHEUMA	Rheumatoid arthritis || id:finngen_R11_M13_RHEUMA	INHBA++Inhibin_bA_chain	Wald ratio	1	-0.0580158	0.145779	0.690651	-0.343742	0.227711	0.943635	0.709112	1.25572	0.921545
FRZB	finngen_R11_M13_RHEUMA	Rheumatoid arthritis || id:finngen_R11_M13_RHEUMA	FRZB++sFRP_3	Inverse variance weighted	6	0.0330929	0.0340667	0.331341	-0.0336778	0.0998636	1.03365	0.966883	1.10502	0.986973
FRZB	finngen_R11_M13_RHEUMA	Rheumatoid arthritis || id:finngen_R11_M13_RHEUMA	FRZB++sFRP_3	MR Egger	6	0.0250171	0.0533612	0.663604	-0.0795708	0.129605	1.02533	0.923513	1.13838	0.999671
FRZB	finngen_R11_M13_RHEUMA	Rheumatoid arthritis || id:finngen_R11_M13_RHEUMA	FRZB++sFRP_3	Weighted median	6	0.0309112	0.037106	0.404815	-0.0418165	0.103639	1.03139	0.959046	1.1092	0.88643
FRZB	finngen_R11_M13_RHEUMA	Rheumatoid arthritis || id:finngen_R11_M13_RHEUMA	FRZB++sFRP_3	Weighted mode	6	0.0342164	0.0376398	0.405011	-0.0395576	0.10799	1.03481	0.961215	1.11404	0.976532
FRZB	finngen_R11_M13_RHEUMA	Rheumatoid arthritis || id:finngen_R11_M13_RHEUMA	FRZB++sFRP_3	Maximum likelihood	6	0.033098	0.0340765	0.331406	-0.0336919	0.0998879	1.03365	0.966869	1.10505	0.855362
FRZB	finngen_R11_M13_RHEUMA	Rheumatoid arthritis || id:finngen_R11_M13_RHEUMA	FRZB++sFRP_3	Simple mode	6	0.0490108	0.0574753	0.432749	-0.0636408	0.161662	1.05023	0.938342	1.17546	0.994896
APOBEC3G	finngen_R11_M13_RHEUMA	Rheumatoid arthritis || id:finngen_R11_M13_RHEUMA	APOBEC3G++ABC3G_NA_ABC3G	Inverse variance weighted	2	-0.162125	0.0926855	0.080258	-0.343788	0.0195389	0.850335	0.709079	1.01973	0.760764
APOBEC3G	finngen_R11_M13_RHEUMA	Rheumatoid arthritis || id:finngen_R11_M13_RHEUMA	APOBEC3G++ABC3G_NA_ABC3G	Maximum likelihood	2	-0.162509	0.0933988	0.0818683	-0.345571	0.0205527	0.850008	0.707816	1.02077	0.57898
PSMD9	finngen_R11_M13_RHEUMA	Rheumatoid arthritis || id:finngen_R11_M13_RHEUMA	PSMD9++PSMD9_NA_PSMD9	Wald ratio	1	-0.193563	0.104935	0.0650969	-0.399236	0.0121103	0.824018	0.670833	1.01218	0.483453
MCF2L	finngen_R11_M13_RHEUMA	Rheumatoid arthritis || id:finngen_R11_M13_RHEUMA	MCF2L++MCF2L_NA_MCF2L	Inverse variance weighted	2	-0.0706881	0.056664	0.212216	-0.18175	0.0403734	0.931752	0.83381	1.0412	0.927309
MCF2L	finngen_R11_M13_RHEUMA	Rheumatoid arthritis || id:finngen_R11_M13_RHEUMA	MCF2L++MCF2L_NA_MCF2L	Maximum likelihood	2	-0.0706964	0.0567302	0.212696	-0.181888	0.0404948	0.931745	0.833695	1.04133	0.776155
IFI16	finngen_R11_M13_RHEUMA	Rheumatoid arthritis || id:finngen_R11_M13_RHEUMA	IFI16++IP16_NA_IP16	Wald ratio	1	0.284464	0.169149	0.0926202	-0.0470683	0.615997	1.32905	0.954022	1.8515	0.541774
DPY30	finngen_R11_M13_RHEUMA	Rheumatoid arthritis || id:finngen_R11_M13_RHEUMA	DPY30++DPY30_NA_DPY30	Wald ratio	1	0.184708	0.214822	0.389889	-0.236343	0.605759	1.20287	0.78951	1.83264	0.789737
GNPNAT1	finngen_R11_M13_RHEUMA	Rheumatoid arthritis || id:finngen_R11_M13_RHEUMA	GNPNAT1++GNA1_NA_GNA1	Wald ratio	1	-0.228871	0.200867	0.25453	-0.62257	0.164829	0.795431	0.536564	1.17919	0.722927
LAP3	finngen_R11_M13_RHEUMA	Rheumatoid arthritis || id:finngen_R11_M13_RHEUMA	LAP3++LAP_NA_LAP	Inverse variance weighted	3	0.0332224	0.0544957	0.542105	-0.0735893	0.140034	1.03378	0.929053	1.15031	0.990373
LAP3	finngen_R11_M13_RHEUMA	Rheumatoid arthritis || id:finngen_R11_M13_RHEUMA	LAP3++LAP_NA_LAP	MR Egger	3	0.0776497	0.0723698	0.477603	-0.0641951	0.219495	1.08074	0.937822	1.24545	0.999671
LAP3	finngen_R11_M13_RHEUMA	Rheumatoid arthritis || id:finngen_R11_M13_RHEUMA	LAP3++LAP_NA_LAP	Weighted median	3	0.0455261	0.0563326	0.418995	-0.0648857	0.155938	1.04658	0.937175	1.16875	0.893422
LAP3	finngen_R11_M13_RHEUMA	Rheumatoid arthritis || id:finngen_R11_M13_RHEUMA	LAP3++LAP_NA_LAP	Weighted mode	3	0.0466401	0.0530835	0.472278	-0.0574036	0.150684	1.04774	0.944213	1.16263	0.976532
LAP3	finngen_R11_M13_RHEUMA	Rheumatoid arthritis || id:finngen_R11_M13_RHEUMA	LAP3++LAP_NA_LAP	Maximum likelihood	3	0.0332731	0.054544	0.541846	-0.0736331	0.140179	1.03383	0.929012	1.15048	0.92239
LAP3	finngen_R11_M13_RHEUMA	Rheumatoid arthritis || id:finngen_R11_M13_RHEUMA	LAP3++LAP_NA_LAP	Simple mode	3	0.0362705	0.116102	0.7843	-0.19129	0.263831	1.03694	0.825893	1.30191	0.994896
KPNA6	finngen_R11_M13_RHEUMA	Rheumatoid arthritis || id:finngen_R11_M13_RHEUMA	KPNA6++IMA7_NA_IMA7	Wald ratio	1	-0.193124	0.189066	0.307035	-0.563694	0.177446	0.82438	0.569103	1.19416	0.753386
HSD17B14	finngen_R11_M13_RHEUMA	Rheumatoid arthritis || id:finngen_R11_M13_RHEUMA	HSD17B14++DHB14_NA_DHB14	Inverse variance weighted	2	0.172213	0.334296	0.606446	-0.483006	0.827433	1.18793	0.616926	2.28744	0.990373
HSD17B14	finngen_R11_M13_RHEUMA	Rheumatoid arthritis || id:finngen_R11_M13_RHEUMA	HSD17B14++DHB14_NA_DHB14	Maximum likelihood	2	0.1794	0.151022	0.234869	-0.116602	0.475403	1.1965	0.889939	1.60866	0.7864
TTL	finngen_R11_M13_RHEUMA	Rheumatoid arthritis || id:finngen_R11_M13_RHEUMA	TTL++TTL_NA_TTL	Wald ratio	1	0.0689174	0.313494	0.825999	-0.545532	0.683366	1.07135	0.579534	1.98053	0.944479
RGS18	finngen_R11_M13_RHEUMA	Rheumatoid arthritis || id:finngen_R11_M13_RHEUMA	RGS18++RGS18_NA_RGS18	Wald ratio	1	-0.203285	0.224073	0.364288	-0.642468	0.235898	0.816046	0.525993	1.26605	0.777232
LANCL1	finngen_R11_M13_RHEUMA	Rheumatoid arthritis || id:finngen_R11_M13_RHEUMA	LANCL1++LANC1_NA_LANC1	Inverse variance weighted	2	0.0305748	0.0551826	0.579534	-0.0775832	0.138733	1.03105	0.92535	1.14882	0.990373
LANCL1	finngen_R11_M13_RHEUMA	Rheumatoid arthritis || id:finngen_R11_M13_RHEUMA	LANCL1++LANC1_NA_LANC1	Maximum likelihood	2	0.0305756	0.055214	0.57974	-0.0776438	0.138795	1.03105	0.925294	1.14889	0.925963
GNMT	finngen_R11_M13_RHEUMA	Rheumatoid arthritis || id:finngen_R11_M13_RHEUMA	GNMT++GNMT_NA_GNMT	Inverse variance weighted	2	-0.0686726	0.0547922	0.210086	-0.176065	0.03872	0.933632	0.838563	1.03948	0.927309
GNMT	finngen_R11_M13_RHEUMA	Rheumatoid arthritis || id:finngen_R11_M13_RHEUMA	GNMT++GNMT_NA_GNMT	Maximum likelihood	2	-0.0687165	0.0548823	0.210544	-0.176286	0.0388528	0.933591	0.838378	1.03962	0.775689
TNFAIP3	finngen_R11_M13_RHEUMA	Rheumatoid arthritis || id:finngen_R11_M13_RHEUMA	TNFAIP3++TNFAIP3_NA_TNFAIP3	Wald ratio	1	0.227347	0.11361	0.0453802	0.00467092	0.450024	1.25527	1.00468	1.56835	0.410452
DHX58	finngen_R11_M13_RHEUMA	Rheumatoid arthritis || id:finngen_R11_M13_RHEUMA	DHX58++LGP2_NA_LGP2	Inverse variance weighted	2	-0.132462	0.10558	0.209621	-0.339399	0.0744756	0.875936	0.712198	1.07732	0.927309
DHX58	finngen_R11_M13_RHEUMA	Rheumatoid arthritis || id:finngen_R11_M13_RHEUMA	DHX58++LGP2_NA_LGP2	Maximum likelihood	2	-0.132622	0.0738921	0.0726856	-0.27745	0.012207	0.875796	0.757713	1.01228	0.535578
BDNF	finngen_R11_M13_RHEUMA	Rheumatoid arthritis || id:finngen_R11_M13_RHEUMA	BDNF++BDNF_NA_BDNF	Inverse variance weighted	2	0.150414	0.115066	0.191146	-0.0751154	0.375943	1.16232	0.927636	1.45636	0.927309
BDNF	finngen_R11_M13_RHEUMA	Rheumatoid arthritis || id:finngen_R11_M13_RHEUMA	BDNF++BDNF_NA_BDNF	Maximum likelihood	2	0.151028	0.11596	0.192776	-0.0762541	0.37831	1.16303	0.926581	1.45982	0.752884
IL1RAP	finngen_R11_M13_RHEUMA	Rheumatoid arthritis || id:finngen_R11_M13_RHEUMA	IL1RAP++IL_1_R_AcP	Inverse variance weighted	5	0.021029	0.0211957	0.321131	-0.0205145	0.0625725	1.02125	0.979694	1.06457	0.986776
IL1RAP	finngen_R11_M13_RHEUMA	Rheumatoid arthritis || id:finngen_R11_M13_RHEUMA	IL1RAP++IL_1_R_AcP	MR Egger	5	0.0423852	0.0341071	0.302256	-0.0244647	0.109235	1.0433	0.975832	1.11542	0.999671
IL1RAP	finngen_R11_M13_RHEUMA	Rheumatoid arthritis || id:finngen_R11_M13_RHEUMA	IL1RAP++IL_1_R_AcP	Weighted median	5	0.0252682	0.0244494	0.301373	-0.0226525	0.073189	1.02559	0.977602	1.07593	0.88365
IL1RAP	finngen_R11_M13_RHEUMA	Rheumatoid arthritis || id:finngen_R11_M13_RHEUMA	IL1RAP++IL_1_R_AcP	Weighted mode	5	0.0264599	0.0253685	0.355826	-0.0232625	0.0761822	1.02681	0.977006	1.07916	0.976532
IL1RAP	finngen_R11_M13_RHEUMA	Rheumatoid arthritis || id:finngen_R11_M13_RHEUMA	IL1RAP++IL_1_R_AcP	Maximum likelihood	5	0.0210432	0.0212031	0.320975	-0.0205149	0.0626013	1.02127	0.979694	1.0646	0.848531
IL1RAP	finngen_R11_M13_RHEUMA	Rheumatoid arthritis || id:finngen_R11_M13_RHEUMA	IL1RAP++IL_1_R_AcP	Simple mode	5	0.0334898	0.0286475	0.307305	-0.0226593	0.0896388	1.03406	0.977596	1.09378	0.994896
IL15RA	finngen_R11_M13_RHEUMA	Rheumatoid arthritis || id:finngen_R11_M13_RHEUMA	IL15RA++IL_15_Ra	Inverse variance weighted	6	-0.0310583	0.0304117	0.307131	-0.0906653	0.0285487	0.969419	0.913323	1.02896	0.986776
IL15RA	finngen_R11_M13_RHEUMA	Rheumatoid arthritis || id:finngen_R11_M13_RHEUMA	IL15RA++IL_15_Ra	MR Egger	6	-0.0938708	0.0623503	0.206643	-0.216077	0.0283358	0.9104	0.805673	1.02874	0.999671
IL15RA	finngen_R11_M13_RHEUMA	Rheumatoid arthritis || id:finngen_R11_M13_RHEUMA	IL15RA++IL_15_Ra	Weighted median	6	-0.0376296	0.0306686	0.219831	-0.09774	0.0224808	0.96307	0.906885	1.02274	0.834332
IL15RA	finngen_R11_M13_RHEUMA	Rheumatoid arthritis || id:finngen_R11_M13_RHEUMA	IL15RA++IL_15_Ra	Weighted mode	6	-0.0388179	0.032365	0.284112	-0.102253	0.0246175	0.961926	0.902801	1.02492	0.976532
IL15RA	finngen_R11_M13_RHEUMA	Rheumatoid arthritis || id:finngen_R11_M13_RHEUMA	IL15RA++IL_15_Ra	Maximum likelihood	6	-0.0311052	0.0290751	0.284699	-0.0880923	0.025882	0.969374	0.915676	1.02622	0.830031
IL15RA	finngen_R11_M13_RHEUMA	Rheumatoid arthritis || id:finngen_R11_M13_RHEUMA	IL15RA++IL_15_Ra	Simple mode	6	-0.0409836	0.068199	0.57408	-0.174654	0.0926865	0.959845	0.839748	1.09712	0.994896
PKP2	finngen_R11_M13_RHEUMA	Rheumatoid arthritis || id:finngen_R11_M13_RHEUMA	PKP2++PKP2_NA_PKP2	Inverse variance weighted	2	0.0367977	0.14848	0.804267	-0.254223	0.327818	1.03748	0.775519	1.38794	0.992378
PKP2	finngen_R11_M13_RHEUMA	Rheumatoid arthritis || id:finngen_R11_M13_RHEUMA	PKP2++PKP2_NA_PKP2	Maximum likelihood	2	0.0372071	0.0985051	0.70564	-0.155863	0.230277	1.03791	0.855677	1.25895	0.940854
IGFBP6	finngen_R11_M13_RHEUMA	Rheumatoid arthritis || id:finngen_R11_M13_RHEUMA	IGFBP6++IGFBP_6	Wald ratio	1	-0.205935	0.163238	0.207106	-0.525882	0.114012	0.813886	0.591034	1.12077	0.707719
DEF6	finngen_R11_M13_RHEUMA	Rheumatoid arthritis || id:finngen_R11_M13_RHEUMA	DEF6++DEFI6_NA_DEFI6	Wald ratio	1	-0.26821	0.0867084	0.00197981	-0.438159	-0.0982619	0.764747	0.645223	0.906412	0.113803
HBEGF	finngen_R11_M13_RHEUMA	Rheumatoid arthritis || id:finngen_R11_M13_RHEUMA	HBEGF++HB_EGF	Wald ratio	1	0.0805769	0.245558	0.742807	-0.400716	0.56187	1.08391	0.66984	1.75395	0.935106
C1QC	finngen_R11_M13_RHEUMA	Rheumatoid arthritis || id:finngen_R11_M13_RHEUMA	C1QC++C1QC_NA_C1QC	Inverse variance weighted	8	-0.0134062	0.0293157	0.647453	-0.0708649	0.0440526	0.986683	0.931588	1.04504	0.990373
C1QC	finngen_R11_M13_RHEUMA	Rheumatoid arthritis || id:finngen_R11_M13_RHEUMA	C1QC++C1QC_NA_C1QC	MR Egger	8	-0.000366607	0.0650991	0.995689	-0.127961	0.127228	0.999633	0.879888	1.13568	0.999671
C1QC	finngen_R11_M13_RHEUMA	Rheumatoid arthritis || id:finngen_R11_M13_RHEUMA	C1QC++C1QC_NA_C1QC	Weighted median	8	-0.00342895	0.0335877	0.918686	-0.0692608	0.0624029	0.996577	0.933083	1.06439	0.982685
C1QC	finngen_R11_M13_RHEUMA	Rheumatoid arthritis || id:finngen_R11_M13_RHEUMA	C1QC++C1QC_NA_C1QC	Weighted mode	8	-0.00309944	0.032209	0.926036	-0.066229	0.0600301	0.996905	0.935916	1.06187	0.984041
C1QC	finngen_R11_M13_RHEUMA	Rheumatoid arthritis || id:finngen_R11_M13_RHEUMA	C1QC++C1QC_NA_C1QC	Maximum likelihood	8	-0.0134467	0.0293882	0.647273	-0.0710476	0.0441542	0.986643	0.931418	1.04514	0.931807
C1QC	finngen_R11_M13_RHEUMA	Rheumatoid arthritis || id:finngen_R11_M13_RHEUMA	C1QC++C1QC_NA_C1QC	Simple mode	8	-0.0274405	0.0570278	0.645067	-0.139215	0.0843339	0.972933	0.870041	1.08799	0.994896
RAP1GDS1	finngen_R11_M13_RHEUMA	Rheumatoid arthritis || id:finngen_R11_M13_RHEUMA	RAP1GDS1++GDP_GTP_exchange_protein	Wald ratio	1	0.311698	0.258487	0.227873	-0.194936	0.818333	1.36574	0.822887	2.26672	0.722258
THBS2	finngen_R11_M13_RHEUMA	Rheumatoid arthritis || id:finngen_R11_M13_RHEUMA	THBS2++TSP2_NA_TSP2	Wald ratio	1	-0.128736	0.156296	0.41013	-0.435076	0.177605	0.879206	0.647216	1.19435	0.812556
RELT	finngen_R11_M13_RHEUMA	Rheumatoid arthritis || id:finngen_R11_M13_RHEUMA	RELT++RELT_NA_RELT	Wald ratio	1	0.581455	0.224269	0.00952349	0.141888	1.02102	1.78864	1.15245	2.77603	0.193536
PIANP	finngen_R11_M13_RHEUMA	Rheumatoid arthritis || id:finngen_R11_M13_RHEUMA	PIANP++PIANP_NA_PIANP	Wald ratio	1	-0.0771857	0.0749779	0.30327	-0.224142	0.069771	0.925718	0.799201	1.07226	0.753386
S100A4	finngen_R11_M13_RHEUMA	Rheumatoid arthritis || id:finngen_R11_M13_RHEUMA	S100A4++S100A4_NA_S100A4	Inverse variance weighted	2	-0.0524349	0.123919	0.672194	-0.295316	0.190446	0.948916	0.744296	1.20979	0.990373
S100A4	finngen_R11_M13_RHEUMA	Rheumatoid arthritis || id:finngen_R11_M13_RHEUMA	S100A4++S100A4_NA_S100A4	Maximum likelihood	2	-0.0524707	0.124044	0.672294	-0.295597	0.190655	0.948882	0.744087	1.21004	0.93286
EFNB2	finngen_R11_M13_RHEUMA	Rheumatoid arthritis || id:finngen_R11_M13_RHEUMA	EFNB2++EFNB2_NA_EFNB2	Inverse variance weighted	2	-0.114853	0.15999	0.472835	-0.428433	0.198728	0.891497	0.651529	1.21985	0.990373
EFNB2	finngen_R11_M13_RHEUMA	Rheumatoid arthritis || id:finngen_R11_M13_RHEUMA	EFNB2++EFNB2_NA_EFNB2	Maximum likelihood	2	-0.114922	0.160431	0.473787	-0.429368	0.199524	0.891436	0.650921	1.22082	0.9072
EFNA3	finngen_R11_M13_RHEUMA	Rheumatoid arthritis || id:finngen_R11_M13_RHEUMA	EFNA3++Ephrin_A3	Wald ratio	1	-0.717739	0.484282	0.138323	-1.66693	0.231455	0.487854	0.188826	1.26043	0.606659
YWHAB	finngen_R11_M13_RHEUMA	Rheumatoid arthritis || id:finngen_R11_M13_RHEUMA	YWHAB++14_3_3_protein_beta_alpha	Inverse variance weighted	2	0.0920204	0.140455	0.512364	-0.183271	0.367311	1.09639	0.832543	1.44385	0.990373
YWHAB	finngen_R11_M13_RHEUMA	Rheumatoid arthritis || id:finngen_R11_M13_RHEUMA	YWHAB++14_3_3_protein_beta_alpha	Maximum likelihood	2	0.0923008	0.0794612	0.245405	-0.0634431	0.248045	1.09669	0.938528	1.28152	0.791309
ANXA5	finngen_R11_M13_RHEUMA	Rheumatoid arthritis || id:finngen_R11_M13_RHEUMA	ANXA5++Annexin_V	Inverse variance weighted	2	-0.10302	0.086543	0.233892	-0.272644	0.0666041	0.902109	0.761364	1.06887	0.944804
ANXA5	finngen_R11_M13_RHEUMA	Rheumatoid arthritis || id:finngen_R11_M13_RHEUMA	ANXA5++Annexin_V	Maximum likelihood	2	-0.103124	0.0867138	0.234343	-0.273083	0.0668351	0.902015	0.76103	1.06912	0.7864
ANXA7	finngen_R11_M13_RHEUMA	Rheumatoid arthritis || id:finngen_R11_M13_RHEUMA	ANXA7++ANXA7_NA_ANXA7	Inverse variance weighted	2	0.0927497	0.131804	0.481622	-0.165586	0.351085	1.09719	0.847397	1.42061	0.990373
ANXA7	finngen_R11_M13_RHEUMA	Rheumatoid arthritis || id:finngen_R11_M13_RHEUMA	ANXA7++ANXA7_NA_ANXA7	Maximum likelihood	2	0.0927917	0.131921	0.481816	-0.165774	0.351358	1.09723	0.847237	1.421	0.9072
HEXIM2	finngen_R11_M13_RHEUMA	Rheumatoid arthritis || id:finngen_R11_M13_RHEUMA	HEXIM2++HEXI2_NA_HEXI2	Wald ratio	1	-0.0318764	0.146204	0.827408	-0.318436	0.254683	0.968626	0.727285	1.29005	0.944479
RBP7	finngen_R11_M13_RHEUMA	Rheumatoid arthritis || id:finngen_R11_M13_RHEUMA	RBP7++RET7_NA_RET7	Wald ratio	1	-0.0454682	0.10765	0.672755	-0.256463	0.165526	0.95555	0.773784	1.18001	0.917891
RAB6B	finngen_R11_M13_RHEUMA	Rheumatoid arthritis || id:finngen_R11_M13_RHEUMA	RAB6B++RAB6B_NA_RAB6B	Wald ratio	1	-0.0355203	0.0579969	0.540239	-0.149194	0.0781537	0.965103	0.861402	1.08129	0.873359
PREP	finngen_R11_M13_RHEUMA	Rheumatoid arthritis || id:finngen_R11_M13_RHEUMA	PREP++PPCE_NA_PPCE	Inverse variance weighted	2	0.0347748	0.0718571	0.628425	-0.106065	0.175615	1.03539	0.899366	1.19198	0.990373
PREP	finngen_R11_M13_RHEUMA	Rheumatoid arthritis || id:finngen_R11_M13_RHEUMA	PREP++PPCE_NA_PPCE	Maximum likelihood	2	0.0347788	0.0718826	0.628508	-0.106111	0.175669	1.03539	0.899325	1.19204	0.929849
VOPP1	finngen_R11_M13_RHEUMA	Rheumatoid arthritis || id:finngen_R11_M13_RHEUMA	VOPP1++ECOP_NA_ECOP	Inverse variance weighted	2	0.0601566	0.203611	0.767652	-0.338922	0.459235	1.062	0.712538	1.58286	0.990373
VOPP1	finngen_R11_M13_RHEUMA	Rheumatoid arthritis || id:finngen_R11_M13_RHEUMA	VOPP1++ECOP_NA_ECOP	Maximum likelihood	2	0.0612769	0.146342	0.675417	-0.225553	0.348106	1.06319	0.798075	1.41638	0.93286
SUMO3	finngen_R11_M13_RHEUMA	Rheumatoid arthritis || id:finngen_R11_M13_RHEUMA	SUMO3++SUMO3_NA_SUMO3	Wald ratio	1	-0.00968912	0.216736	0.964343	-0.434492	0.415114	0.990358	0.647594	1.51454	0.984055
DNAJC17	finngen_R11_M13_RHEUMA	Rheumatoid arthritis || id:finngen_R11_M13_RHEUMA	DNAJC17++DJC17_NA_DJC17	Inverse variance weighted	2	-0.17134	0.115442	0.137753	-0.397606	0.0549258	0.842535	0.671927	1.05646	0.838508
DNAJC17	finngen_R11_M13_RHEUMA	Rheumatoid arthritis || id:finngen_R11_M13_RHEUMA	DNAJC17++DJC17_NA_DJC17	Maximum likelihood	2	-0.171356	0.11592	0.139348	-0.39856	0.0558474	0.842521	0.671286	1.05744	0.666962
CAPN2	finngen_R11_M13_RHEUMA	Rheumatoid arthritis || id:finngen_R11_M13_RHEUMA	CAPN2++CAN2_NA_CAN2	Inverse variance weighted	3	-0.0245619	0.0562939	0.662607	-0.134898	0.0857741	0.975737	0.873805	1.08956	0.990373
CAPN2	finngen_R11_M13_RHEUMA	Rheumatoid arthritis || id:finngen_R11_M13_RHEUMA	CAPN2++CAN2_NA_CAN2	MR Egger	3	-0.0424628	0.0743178	0.669531	-0.188126	0.1032	0.958426	0.828511	1.10871	0.999671
CAPN2	finngen_R11_M13_RHEUMA	Rheumatoid arthritis || id:finngen_R11_M13_RHEUMA	CAPN2++CAN2_NA_CAN2	Weighted median	3	-0.029064	0.056265	0.605467	-0.139343	0.0812155	0.971354	0.869929	1.0846	0.965696
CAPN2	finngen_R11_M13_RHEUMA	Rheumatoid arthritis || id:finngen_R11_M13_RHEUMA	CAPN2++CAN2_NA_CAN2	Weighted mode	3	-0.0319779	0.0563148	0.627389	-0.142355	0.078399	0.968528	0.867313	1.08155	0.9821
CAPN2	finngen_R11_M13_RHEUMA	Rheumatoid arthritis || id:finngen_R11_M13_RHEUMA	CAPN2++CAN2_NA_CAN2	Maximum likelihood	3	-0.0245707	0.0563102	0.662587	-0.134939	0.0857974	0.975729	0.873769	1.08959	0.93286
CAPN2	finngen_R11_M13_RHEUMA	Rheumatoid arthritis || id:finngen_R11_M13_RHEUMA	CAPN2++CAN2_NA_CAN2	Simple mode	3	-0.0188393	0.0866896	0.848115	-0.188751	0.151072	0.981337	0.827993	1.16308	0.994896
PTPN7	finngen_R11_M13_RHEUMA	Rheumatoid arthritis || id:finngen_R11_M13_RHEUMA	PTPN7++PTN7_NA_PTN7	Wald ratio	1	-0.0890068	0.22141	0.687684	-0.52297	0.344957	0.914839	0.592757	1.41193	0.921545
CST6	finngen_R11_M13_RHEUMA	Rheumatoid arthritis || id:finngen_R11_M13_RHEUMA	CST6++Cystatin_M	Inverse variance weighted	3	0.0598232	0.0760672	0.431603	-0.0892685	0.208915	1.06165	0.9146	1.23234	0.990373
CST6	finngen_R11_M13_RHEUMA	Rheumatoid arthritis || id:finngen_R11_M13_RHEUMA	CST6++Cystatin_M	MR Egger	3	0.251555	0.155158	0.351845	-0.052554	0.555664	1.28602	0.948803	1.7431	0.999671
CST6	finngen_R11_M13_RHEUMA	Rheumatoid arthritis || id:finngen_R11_M13_RHEUMA	CST6++Cystatin_M	Weighted median	3	0.0666741	0.0702513	0.34258	-0.0710185	0.204367	1.06895	0.931445	1.22675	0.88643
CST6	finngen_R11_M13_RHEUMA	Rheumatoid arthritis || id:finngen_R11_M13_RHEUMA	CST6++Cystatin_M	Weighted mode	3	0.0798044	0.0760779	0.404253	-0.0693084	0.228917	1.08308	0.933039	1.25724	0.976532
CST6	finngen_R11_M13_RHEUMA	Rheumatoid arthritis || id:finngen_R11_M13_RHEUMA	CST6++Cystatin_M	Maximum likelihood	3	0.0599546	0.0737663	0.416354	-0.0846274	0.204537	1.06179	0.918855	1.22696	0.890655
CST6	finngen_R11_M13_RHEUMA	Rheumatoid arthritis || id:finngen_R11_M13_RHEUMA	CST6++Cystatin_M	Simple mode	3	0.152367	0.183847	0.494393	-0.207972	0.512707	1.16459	0.81223	1.66981	0.994896
CRLF1	finngen_R11_M13_RHEUMA	Rheumatoid arthritis || id:finngen_R11_M13_RHEUMA	CRLF1++CRLF1_NA_CRLF1	Wald ratio	1	0.0864379	0.0550678	0.116494	-0.021495	0.194371	1.09028	0.978734	1.21455	0.569184
NETO1	finngen_R11_M13_RHEUMA	Rheumatoid arthritis || id:finngen_R11_M13_RHEUMA	NETO1++NETO1_NA_NETO1	Inverse variance weighted	2	-0.163102	0.167579	0.330414	-0.491558	0.165354	0.849505	0.611673	1.17981	0.986973
NETO1	finngen_R11_M13_RHEUMA	Rheumatoid arthritis || id:finngen_R11_M13_RHEUMA	NETO1++NETO1_NA_NETO1	Maximum likelihood	2	-0.163321	0.168656	0.332861	-0.493886	0.167244	0.849319	0.610251	1.18204	0.855362
CCDC134	finngen_R11_M13_RHEUMA	Rheumatoid arthritis || id:finngen_R11_M13_RHEUMA	CCDC134++CC134_NA_CC134	Inverse variance weighted	2	0.0223741	0.122286	0.854825	-0.217306	0.262054	1.02263	0.804683	1.2996	0.992378
CCDC134	finngen_R11_M13_RHEUMA	Rheumatoid arthritis || id:finngen_R11_M13_RHEUMA	CCDC134++CC134_NA_CC134	Maximum likelihood	2	0.0224518	0.117475	0.848431	-0.207798	0.252702	1.02271	0.812371	1.2875	0.975865
SCGN	finngen_R11_M13_RHEUMA	Rheumatoid arthritis || id:finngen_R11_M13_RHEUMA	SCGN++Secretagogin_NA_Secretagogin	Inverse variance weighted	2	-0.550153	0.684143	0.421311	-1.89107	0.790768	0.576862	0.15091	2.20509	0.990373
SCGN	finngen_R11_M13_RHEUMA	Rheumatoid arthritis || id:finngen_R11_M13_RHEUMA	SCGN++Secretagogin_NA_Secretagogin	Maximum likelihood	2	-0.638375	0.204451	0.00179396	-1.0391	-0.23765	0.52815	0.353773	0.788479	0.161798
TXNL4B	finngen_R11_M13_RHEUMA	Rheumatoid arthritis || id:finngen_R11_M13_RHEUMA	TXNL4B++TXN4B_NA_TXN4B	Inverse variance weighted	3	0.148149	0.10526	0.159293	-0.058161	0.354458	1.15969	0.943498	1.42541	0.881192
TXNL4B	finngen_R11_M13_RHEUMA	Rheumatoid arthritis || id:finngen_R11_M13_RHEUMA	TXNL4B++TXN4B_NA_TXN4B	MR Egger	3	0.352682	0.150482	0.256744	0.0577372	0.647627	1.42288	1.05944	1.911	0.999671
TXNL4B	finngen_R11_M13_RHEUMA	Rheumatoid arthritis || id:finngen_R11_M13_RHEUMA	TXNL4B++TXN4B_NA_TXN4B	Weighted median	3	0.190228	0.0920939	0.0388673	0.00972416	0.370732	1.20953	1.00977	1.4488	0.507742
TXNL4B	finngen_R11_M13_RHEUMA	Rheumatoid arthritis || id:finngen_R11_M13_RHEUMA	TXNL4B++TXN4B_NA_TXN4B	Weighted mode	3	0.190815	0.0991975	0.194312	-0.00361243	0.385242	1.21024	0.996394	1.46997	0.976532
TXNL4B	finngen_R11_M13_RHEUMA	Rheumatoid arthritis || id:finngen_R11_M13_RHEUMA	TXNL4B++TXN4B_NA_TXN4B	Maximum likelihood	3	0.149223	0.0881372	0.09044	-0.0235255	0.321972	1.16093	0.976749	1.37985	0.599165
TXNL4B	finngen_R11_M13_RHEUMA	Rheumatoid arthritis || id:finngen_R11_M13_RHEUMA	TXNL4B++TXN4B_NA_TXN4B	Simple mode	3	0.201938	0.157602	0.328571	-0.106961	0.510837	1.22377	0.89856	1.66669	0.994896
CRADD	finngen_R11_M13_RHEUMA	Rheumatoid arthritis || id:finngen_R11_M13_RHEUMA	CRADD++CRADD_NA_CRADD	Inverse variance weighted	2	-0.0514712	0.246749	0.834763	-0.5351	0.432157	0.949831	0.585611	1.54058	0.992378
CRADD	finngen_R11_M13_RHEUMA	Rheumatoid arthritis || id:finngen_R11_M13_RHEUMA	CRADD++CRADD_NA_CRADD	Maximum likelihood	2	-0.0531469	0.155204	0.732024	-0.357346	0.251052	0.948241	0.69953	1.28538	0.952486
FTL	finngen_R11_M13_RHEUMA	Rheumatoid arthritis || id:finngen_R11_M13_RHEUMA	FTL++Ferritin_light_chain	Wald ratio	1	0.19125	0.368903	0.60416	-0.5318	0.914299	1.21076	0.587547	2.49503	0.885657
CFL2	finngen_R11_M13_RHEUMA	Rheumatoid arthritis || id:finngen_R11_M13_RHEUMA	CFL2++COF2_NA_COF2	Wald ratio	1	0.280627	0.120767	0.0201413	0.0439237	0.517331	1.32396	1.0449	1.67754	0.2609
KNG1	finngen_R11_M13_RHEUMA	Rheumatoid arthritis || id:finngen_R11_M13_RHEUMA	KNG1++Kininogen__HMW__Two_Chain	Inverse variance weighted	5	-0.0222296	0.0329092	0.499369	-0.0867318	0.0422725	0.978016	0.916923	1.04318	0.990373
KNG1	finngen_R11_M13_RHEUMA	Rheumatoid arthritis || id:finngen_R11_M13_RHEUMA	KNG1++Kininogen__HMW__Two_Chain	MR Egger	5	-0.0388025	0.0605314	0.567112	-0.157444	0.0798392	0.961941	0.854325	1.08311	0.999671
KNG1	finngen_R11_M13_RHEUMA	Rheumatoid arthritis || id:finngen_R11_M13_RHEUMA	KNG1++Kininogen__HMW__Two_Chain	Weighted median	5	-0.0219834	0.03362	0.51319	-0.0878786	0.0439118	0.978256	0.915872	1.04489	0.912537
KNG1	finngen_R11_M13_RHEUMA	Rheumatoid arthritis || id:finngen_R11_M13_RHEUMA	KNG1++Kininogen__HMW__Two_Chain	Weighted mode	5	-0.0261427	0.0340054	0.484901	-0.0927932	0.0405079	0.974196	0.911382	1.04134	0.976532
KNG1	finngen_R11_M13_RHEUMA	Rheumatoid arthritis || id:finngen_R11_M13_RHEUMA	KNG1++Kininogen__HMW__Two_Chain	Maximum likelihood	5	-0.0222506	0.0329306	0.499241	-0.0867945	0.0422933	0.977995	0.916865	1.0432	0.9072
KNG1	finngen_R11_M13_RHEUMA	Rheumatoid arthritis || id:finngen_R11_M13_RHEUMA	KNG1++Kininogen__HMW__Two_Chain	Simple mode	5	-0.0500102	0.0783018	0.557765	-0.203482	0.103461	0.95122	0.815885	1.109	0.994896
APOA5	finngen_R11_M13_RHEUMA	Rheumatoid arthritis || id:finngen_R11_M13_RHEUMA	APOA5++Apo_A_V	Inverse variance weighted	8	-0.0168649	0.0334517	0.614151	-0.0824303	0.0487005	0.983277	0.920876	1.04991	0.990373
APOA5	finngen_R11_M13_RHEUMA	Rheumatoid arthritis || id:finngen_R11_M13_RHEUMA	APOA5++Apo_A_V	MR Egger	8	-0.00307264	0.0869662	0.972962	-0.173526	0.167381	0.996932	0.840695	1.1822	0.999671
APOA5	finngen_R11_M13_RHEUMA	Rheumatoid arthritis || id:finngen_R11_M13_RHEUMA	APOA5++Apo_A_V	Weighted median	8	-0.0251252	0.0295954	0.395906	-0.0831321	0.0328818	0.975188	0.92023	1.03343	0.88643
APOA5	finngen_R11_M13_RHEUMA	Rheumatoid arthritis || id:finngen_R11_M13_RHEUMA	APOA5++Apo_A_V	Weighted mode	8	-0.0276589	0.0302673	0.3912	-0.0869827	0.031665	0.97272	0.916693	1.03217	0.976532
APOA5	finngen_R11_M13_RHEUMA	Rheumatoid arthritis || id:finngen_R11_M13_RHEUMA	APOA5++Apo_A_V	Maximum likelihood	8	-0.0168837	0.0274381	0.53833	-0.0706624	0.0368949	0.983258	0.931776	1.03758	0.921707
APOA5	finngen_R11_M13_RHEUMA	Rheumatoid arthritis || id:finngen_R11_M13_RHEUMA	APOA5++Apo_A_V	Simple mode	8	-0.05902	0.0611734	0.366786	-0.17892	0.0608799	0.942688	0.836173	1.06277	0.994896
APOC1	finngen_R11_M13_RHEUMA	Rheumatoid arthritis || id:finngen_R11_M13_RHEUMA	APOC1++Apo_C_I	Inverse variance weighted	3	-0.139508	0.127379	0.27342	-0.389172	0.110155	0.869786	0.677618	1.11645	0.982649
APOC1	finngen_R11_M13_RHEUMA	Rheumatoid arthritis || id:finngen_R11_M13_RHEUMA	APOC1++Apo_C_I	MR Egger	3	-0.470646	0.759711	0.646906	-1.95968	1.01839	0.624598	0.140903	2.76873	0.999671
APOC1	finngen_R11_M13_RHEUMA	Rheumatoid arthritis || id:finngen_R11_M13_RHEUMA	APOC1++Apo_C_I	Weighted median	3	-0.17199	0.12802	0.179122	-0.422909	0.0789291	0.841988	0.655138	1.08213	0.834332
APOC1	finngen_R11_M13_RHEUMA	Rheumatoid arthritis || id:finngen_R11_M13_RHEUMA	APOC1++Apo_C_I	Weighted mode	3	-0.222156	0.145674	0.266755	-0.507676	0.0633638	0.80079	0.601893	1.06541	0.976532
APOC1	finngen_R11_M13_RHEUMA	Rheumatoid arthritis || id:finngen_R11_M13_RHEUMA	APOC1++Apo_C_I	Maximum likelihood	3	-0.141549	0.112665	0.208981	-0.362373	0.0792745	0.868012	0.696023	1.0825	0.775689
APOC1	finngen_R11_M13_RHEUMA	Rheumatoid arthritis || id:finngen_R11_M13_RHEUMA	APOC1++Apo_C_I	Simple mode	3	-0.267384	0.178831	0.273497	-0.617892	0.0831246	0.765379	0.539079	1.08668	0.994896
BMPER	finngen_R11_M13_RHEUMA	Rheumatoid arthritis || id:finngen_R11_M13_RHEUMA	BMPER++BMPER_NA_BMPER	Inverse variance weighted	2	0.0944005	0.105565	0.371191	-0.112506	0.301307	1.099	0.893592	1.35162	0.990373
BMPER	finngen_R11_M13_RHEUMA	Rheumatoid arthritis || id:finngen_R11_M13_RHEUMA	BMPER++BMPER_NA_BMPER	Maximum likelihood	2	0.0944336	0.105964	0.372829	-0.113256	0.302123	1.09904	0.892922	1.35273	0.882878
CPB1	finngen_R11_M13_RHEUMA	Rheumatoid arthritis || id:finngen_R11_M13_RHEUMA	CPB1++Carboxypeptidase_B1	Inverse variance weighted	2	0.101053	0.0923021	0.273603	-0.0798595	0.281965	1.10633	0.923246	1.32573	0.982649
CPB1	finngen_R11_M13_RHEUMA	Rheumatoid arthritis || id:finngen_R11_M13_RHEUMA	CPB1++Carboxypeptidase_B1	Maximum likelihood	2	0.101213	0.0605821	0.0947847	-0.0175276	0.219954	1.10651	0.982625	1.24602	0.599239
CTSE	finngen_R11_M13_RHEUMA	Rheumatoid arthritis || id:finngen_R11_M13_RHEUMA	CTSE++CATE_NA_CATE	Inverse variance weighted	4	-0.063801	0.0316113	0.0435604	-0.125759	-0.00184282	0.938192	0.881827	0.998159	0.682376
CTSE	finngen_R11_M13_RHEUMA	Rheumatoid arthritis || id:finngen_R11_M13_RHEUMA	CTSE++CATE_NA_CATE	MR Egger	4	-0.0548793	0.0548258	0.422274	-0.162338	0.0525792	0.946599	0.850154	1.05399	0.999671
CTSE	finngen_R11_M13_RHEUMA	Rheumatoid arthritis || id:finngen_R11_M13_RHEUMA	CTSE++CATE_NA_CATE	Weighted median	4	-0.0683649	0.0316611	0.0308289	-0.130421	-0.00630924	0.93392	0.877726	0.993711	0.469855
CTSE	finngen_R11_M13_RHEUMA	Rheumatoid arthritis || id:finngen_R11_M13_RHEUMA	CTSE++CATE_NA_CATE	Weighted mode	4	-0.0715833	0.0326845	0.11624	-0.135645	-0.00752162	0.930919	0.873153	0.992507	0.976532
CTSE	finngen_R11_M13_RHEUMA	Rheumatoid arthritis || id:finngen_R11_M13_RHEUMA	CTSE++CATE_NA_CATE	Maximum likelihood	4	-0.0639377	0.0317011	0.0437067	-0.126072	-0.00180356	0.938063	0.881552	0.998198	0.499505
CTSE	finngen_R11_M13_RHEUMA	Rheumatoid arthritis || id:finngen_R11_M13_RHEUMA	CTSE++CATE_NA_CATE	Simple mode	4	-0.0734629	0.0674629	0.355836	-0.20569	0.0587643	0.929171	0.814085	1.06053	0.994896
KL	finngen_R11_M13_RHEUMA	Rheumatoid arthritis || id:finngen_R11_M13_RHEUMA	KL++KLOTHO_NA_KLOTHO	Inverse variance weighted	3	0.192348	0.0666142	0.00388318	0.0617846	0.322912	1.21209	1.06373	1.38114	0.24162
KL	finngen_R11_M13_RHEUMA	Rheumatoid arthritis || id:finngen_R11_M13_RHEUMA	KL++KLOTHO_NA_KLOTHO	MR Egger	3	0.136158	0.11907	0.457442	-0.0972201	0.369536	1.14586	0.907356	1.44706	0.999671
KL	finngen_R11_M13_RHEUMA	Rheumatoid arthritis || id:finngen_R11_M13_RHEUMA	KL++KLOTHO_NA_KLOTHO	Weighted median	3	0.192104	0.0696782	0.00583322	0.0555343	0.328673	1.2118	1.05711	1.38912	0.252671
KL	finngen_R11_M13_RHEUMA	Rheumatoid arthritis || id:finngen_R11_M13_RHEUMA	KL++KLOTHO_NA_KLOTHO	Weighted mode	3	0.183749	0.0768061	0.139158	0.0332094	0.334289	1.20171	1.03377	1.39695	0.976532
KL	finngen_R11_M13_RHEUMA	Rheumatoid arthritis || id:finngen_R11_M13_RHEUMA	KL++KLOTHO_NA_KLOTHO	Maximum likelihood	3	0.192793	0.0676187	0.00435566	0.0602608	0.325326	1.21263	1.06211	1.38448	0.188954
KL	finngen_R11_M13_RHEUMA	Rheumatoid arthritis || id:finngen_R11_M13_RHEUMA	KL++KLOTHO_NA_KLOTHO	Simple mode	3	0.169445	0.10365	0.243716	-0.0337086	0.372598	1.18465	0.966853	1.4515	0.994896
FABP2	finngen_R11_M13_RHEUMA	Rheumatoid arthritis || id:finngen_R11_M13_RHEUMA	FABP2++FABP2_NA_FABP2	Inverse variance weighted	4	-0.00963014	0.0272046	0.723347	-0.0629512	0.0436909	0.990416	0.938989	1.04466	0.990373
FABP2	finngen_R11_M13_RHEUMA	Rheumatoid arthritis || id:finngen_R11_M13_RHEUMA	FABP2++FABP2_NA_FABP2	MR Egger	4	-0.00625671	0.103314	0.957217	-0.208753	0.19624	0.993763	0.811596	1.21682	0.999671
FABP2	finngen_R11_M13_RHEUMA	Rheumatoid arthritis || id:finngen_R11_M13_RHEUMA	FABP2++FABP2_NA_FABP2	Weighted median	4	-0.00559893	0.0289822	0.846814	-0.062404	0.0512061	0.994417	0.939503	1.05254	0.982685
FABP2	finngen_R11_M13_RHEUMA	Rheumatoid arthritis || id:finngen_R11_M13_RHEUMA	FABP2++FABP2_NA_FABP2	Weighted mode	4	-0.00455637	0.0302229	0.889732	-0.0637933	0.0546806	0.995454	0.938199	1.0562	0.984041
FABP2	finngen_R11_M13_RHEUMA	Rheumatoid arthritis || id:finngen_R11_M13_RHEUMA	FABP2++FABP2_NA_FABP2	Maximum likelihood	4	-0.00963101	0.0272059	0.723335	-0.0629546	0.0436925	0.990415	0.938986	1.04466	0.952486
FABP2	finngen_R11_M13_RHEUMA	Rheumatoid arthritis || id:finngen_R11_M13_RHEUMA	FABP2++FABP2_NA_FABP2	Simple mode	4	-0.0574907	0.0381448	0.22887	-0.132255	0.0172732	0.944131	0.876118	1.01742	0.994896
NRP2	finngen_R11_M13_RHEUMA	Rheumatoid arthritis || id:finngen_R11_M13_RHEUMA	NRP2++Neuropilin_2	Inverse variance weighted	4	0.0437569	0.0502486	0.383859	-0.0547304	0.142244	1.04473	0.94674	1.15286	0.990373
NRP2	finngen_R11_M13_RHEUMA	Rheumatoid arthritis || id:finngen_R11_M13_RHEUMA	NRP2++Neuropilin_2	MR Egger	4	0.00963855	0.0989578	0.93129	-0.184319	0.203596	1.00969	0.831671	1.2258	0.999671
NRP2	finngen_R11_M13_RHEUMA	Rheumatoid arthritis || id:finngen_R11_M13_RHEUMA	NRP2++Neuropilin_2	Weighted median	4	0.0193015	0.0581229	0.739828	-0.0946194	0.133223	1.01949	0.909719	1.1425	0.982685
NRP2	finngen_R11_M13_RHEUMA	Rheumatoid arthritis || id:finngen_R11_M13_RHEUMA	NRP2++Neuropilin_2	Weighted mode	4	0.0188824	0.0680303	0.799379	-0.114457	0.152222	1.01906	0.89185	1.16442	0.984041
NRP2	finngen_R11_M13_RHEUMA	Rheumatoid arthritis || id:finngen_R11_M13_RHEUMA	NRP2++Neuropilin_2	Maximum likelihood	4	0.0438507	0.0503361	0.383668	-0.0548081	0.142509	1.04483	0.946667	1.15316	0.887826
NRP2	finngen_R11_M13_RHEUMA	Rheumatoid arthritis || id:finngen_R11_M13_RHEUMA	NRP2++Neuropilin_2	Simple mode	4	0.0222297	0.0757848	0.788393	-0.126308	0.170768	1.02248	0.881343	1.18622	0.994896
FCGR3A	finngen_R11_M13_RHEUMA	Rheumatoid arthritis || id:finngen_R11_M13_RHEUMA	FCGR3A++FcRIIIa_NA_FcRIIIa	Inverse variance weighted	11	0.0342838	0.0231227	0.138157	-0.0110367	0.0796044	1.03488	0.989024	1.08286	0.838508
FCGR3A	finngen_R11_M13_RHEUMA	Rheumatoid arthritis || id:finngen_R11_M13_RHEUMA	FCGR3A++FcRIIIa_NA_FcRIIIa	MR Egger	11	0.0625714	0.062739	0.344662	-0.0603971	0.18554	1.06457	0.941391	1.20387	0.999671
FCGR3A	finngen_R11_M13_RHEUMA	Rheumatoid arthritis || id:finngen_R11_M13_RHEUMA	FCGR3A++FcRIIIa_NA_FcRIIIa	Weighted median	11	0.0568946	0.0279262	0.0416183	0.00215917	0.11163	1.05854	1.00216	1.1181	0.511222
FCGR3A	finngen_R11_M13_RHEUMA	Rheumatoid arthritis || id:finngen_R11_M13_RHEUMA	FCGR3A++FcRIIIa_NA_FcRIIIa	Weighted mode	11	0.0427642	0.0236996	0.101318	-0.00368697	0.0892154	1.04369	0.99632	1.09332	0.976532
FCGR3A	finngen_R11_M13_RHEUMA	Rheumatoid arthritis || id:finngen_R11_M13_RHEUMA	FCGR3A++FcRIIIa_NA_FcRIIIa	Maximum likelihood	11	0.0343394	0.0198163	0.0831154	-0.0045005	0.0731794	1.03494	0.99551	1.07592	0.57898
FCGR3A	finngen_R11_M13_RHEUMA	Rheumatoid arthritis || id:finngen_R11_M13_RHEUMA	FCGR3A++FcRIIIa_NA_FcRIIIa	Simple mode	11	0.0155136	0.039016	0.699264	-0.0609577	0.0919849	1.01563	0.940863	1.09635	0.994896
UNC5B	finngen_R11_M13_RHEUMA	Rheumatoid arthritis || id:finngen_R11_M13_RHEUMA	UNC5B++UNC5B_NA_UNC5B	Inverse variance weighted	4	0.0316622	0.0722422	0.661185	-0.109933	0.173257	1.03217	0.895894	1.18917	0.990373
UNC5B	finngen_R11_M13_RHEUMA	Rheumatoid arthritis || id:finngen_R11_M13_RHEUMA	UNC5B++UNC5B_NA_UNC5B	MR Egger	4	0.131022	0.168431	0.518044	-0.199104	0.461147	1.13999	0.819465	1.58589	0.999671
UNC5B	finngen_R11_M13_RHEUMA	Rheumatoid arthritis || id:finngen_R11_M13_RHEUMA	UNC5B++UNC5B_NA_UNC5B	Weighted median	4	0.0451229	0.0791908	0.568814	-0.110091	0.200337	1.04616	0.895753	1.22181	0.946482
UNC5B	finngen_R11_M13_RHEUMA	Rheumatoid arthritis || id:finngen_R11_M13_RHEUMA	UNC5B++UNC5B_NA_UNC5B	Weighted mode	4	0.0484705	0.0760769	0.569336	-0.10064	0.197581	1.04966	0.904258	1.21845	0.976532
UNC5B	finngen_R11_M13_RHEUMA	Rheumatoid arthritis || id:finngen_R11_M13_RHEUMA	UNC5B++UNC5B_NA_UNC5B	Maximum likelihood	4	0.0316824	0.0722753	0.661128	-0.109977	0.173342	1.03219	0.895855	1.18927	0.93286
UNC5B	finngen_R11_M13_RHEUMA	Rheumatoid arthritis || id:finngen_R11_M13_RHEUMA	UNC5B++UNC5B_NA_UNC5B	Simple mode	4	0.0297663	0.10511	0.795447	-0.17625	0.235782	1.03021	0.838409	1.2659	0.994896
GSTM1	finngen_R11_M13_RHEUMA	Rheumatoid arthritis || id:finngen_R11_M13_RHEUMA	GSTM1++GST_M1_1	Inverse variance weighted	6	-0.0174695	0.0218469	0.423925	-0.0602895	0.0253505	0.982682	0.941492	1.02567	0.990373
GSTM1	finngen_R11_M13_RHEUMA	Rheumatoid arthritis || id:finngen_R11_M13_RHEUMA	GSTM1++GST_M1_1	MR Egger	6	-0.0530663	0.0301564	0.15327	-0.112173	0.00604023	0.948317	0.89389	1.00606	0.999671
GSTM1	finngen_R11_M13_RHEUMA	Rheumatoid arthritis || id:finngen_R11_M13_RHEUMA	GSTM1++GST_M1_1	Weighted median	6	-0.0288198	0.0231752	0.21366	-0.0742432	0.0166035	0.971591	0.928446	1.01674	0.834332
GSTM1	finngen_R11_M13_RHEUMA	Rheumatoid arthritis || id:finngen_R11_M13_RHEUMA	GSTM1++GST_M1_1	Weighted mode	6	-0.0289361	0.0250117	0.299577	-0.0779591	0.0200869	0.971479	0.925002	1.02029	0.976532
GSTM1	finngen_R11_M13_RHEUMA	Rheumatoid arthritis || id:finngen_R11_M13_RHEUMA	GSTM1++GST_M1_1	Maximum likelihood	6	-0.0174804	0.0218575	0.42386	-0.060321	0.0253603	0.982672	0.941462	1.02568	0.890655
GSTM1	finngen_R11_M13_RHEUMA	Rheumatoid arthritis || id:finngen_R11_M13_RHEUMA	GSTM1++GST_M1_1	Simple mode	6	-0.0131846	0.0469917	0.790277	-0.105288	0.0789191	0.986902	0.900065	1.08212	0.994896
GFER	finngen_R11_M13_RHEUMA	Rheumatoid arthritis || id:finngen_R11_M13_RHEUMA	GFER++HERV1_NA_HERV1	Wald ratio	1	-0.28521	0.218154	0.191084	-0.712793	0.142372	0.751856	0.490273	1.15301	0.68667
LDHA	finngen_R11_M13_RHEUMA	Rheumatoid arthritis || id:finngen_R11_M13_RHEUMA	LDHA++LDHA_NA_LDHA	Wald ratio	1	0.157582	0.235443	0.503304	-0.303887	0.619051	1.17068	0.737944	1.85717	0.853181
SERPINB5	finngen_R11_M13_RHEUMA	Rheumatoid arthritis || id:finngen_R11_M13_RHEUMA	SERPINB5++Maspin_NA_Maspin	Wald ratio	1	0.00155625	0.0922581	0.986542	-0.17927	0.182382	1.00156	0.835881	1.20007	0.997284
LOXL3	finngen_R11_M13_RHEUMA	Rheumatoid arthritis || id:finngen_R11_M13_RHEUMA	LOXL3++LOXL3_NA_LOXL3	Wald ratio	1	0.0654921	0.13595	0.629993	-0.20097	0.331954	1.06768	0.817937	1.39369	0.89289
PNP	finngen_R11_M13_RHEUMA	Rheumatoid arthritis || id:finngen_R11_M13_RHEUMA	PNP++PNP_NA_PNP	Inverse variance weighted	2	-0.121126	0.0839877	0.149251	-0.285742	0.0434903	0.885923	0.751457	1.04445	0.87959
PNP	finngen_R11_M13_RHEUMA	Rheumatoid arthritis || id:finngen_R11_M13_RHEUMA	PNP++PNP_NA_PNP	Maximum likelihood	2	-0.121266	0.0843252	0.150414	-0.286543	0.0440119	0.885799	0.750855	1.04499	0.687608
PCSK2	finngen_R11_M13_RHEUMA	Rheumatoid arthritis || id:finngen_R11_M13_RHEUMA	PCSK2++NEC2_NA_NEC2	Wald ratio	1	-0.122879	0.149586	0.411384	-0.416068	0.17031	0.884371	0.659636	1.18567	0.812556
GM2A	finngen_R11_M13_RHEUMA	Rheumatoid arthritis || id:finngen_R11_M13_RHEUMA	GM2A++SAP3_NA_SAP3	Inverse variance weighted	3	-0.0398514	0.0668527	0.551103	-0.170883	0.0911798	0.960932	0.842921	1.09547	0.990373
GM2A	finngen_R11_M13_RHEUMA	Rheumatoid arthritis || id:finngen_R11_M13_RHEUMA	GM2A++SAP3_NA_SAP3	MR Egger	3	-0.138979	0.250521	0.677559	-0.63	0.352042	0.870247	0.532592	1.42197	0.999671
GM2A	finngen_R11_M13_RHEUMA	Rheumatoid arthritis || id:finngen_R11_M13_RHEUMA	GM2A++SAP3_NA_SAP3	Weighted median	3	-0.0376736	0.0473188	0.425936	-0.130418	0.0550713	0.963027	0.877728	1.05662	0.894248
GM2A	finngen_R11_M13_RHEUMA	Rheumatoid arthritis || id:finngen_R11_M13_RHEUMA	GM2A++SAP3_NA_SAP3	Weighted mode	3	-0.0531459	0.0627527	0.486226	-0.176141	0.0698493	0.948242	0.8385	1.07235	0.976532
GM2A	finngen_R11_M13_RHEUMA	Rheumatoid arthritis || id:finngen_R11_M13_RHEUMA	GM2A++SAP3_NA_SAP3	Maximum likelihood	3	-0.0400526	0.0450109	0.373551	-0.128274	0.0481688	0.960739	0.879612	1.04935	0.882878
GM2A	finngen_R11_M13_RHEUMA	Rheumatoid arthritis || id:finngen_R11_M13_RHEUMA	GM2A++SAP3_NA_SAP3	Simple mode	3	-0.0763362	0.0744162	0.412847	-0.222192	0.0695196	0.926505	0.800762	1.07199	0.994896
SERPINB4	finngen_R11_M13_RHEUMA	Rheumatoid arthritis || id:finngen_R11_M13_RHEUMA	SERPINB4++SCCA2_NA_SCCA2	Inverse variance weighted	3	-0.187419	0.070725	0.00804978	-0.32604	-0.0487984	0.829096	0.721776	0.952373	0.31646
SERPINB4	finngen_R11_M13_RHEUMA	Rheumatoid arthritis || id:finngen_R11_M13_RHEUMA	SERPINB4++SCCA2_NA_SCCA2	MR Egger	3	-0.163069	0.0906617	0.323032	-0.340766	0.0146282	0.849533	0.711225	1.01474	0.999671
SERPINB4	finngen_R11_M13_RHEUMA	Rheumatoid arthritis || id:finngen_R11_M13_RHEUMA	SERPINB4++SCCA2_NA_SCCA2	Weighted median	3	-0.179188	0.071826	0.0126048	-0.319967	-0.0384086	0.835949	0.726173	0.96232	0.362931
SERPINB4	finngen_R11_M13_RHEUMA	Rheumatoid arthritis || id:finngen_R11_M13_RHEUMA	SERPINB4++SCCA2_NA_SCCA2	Weighted mode	3	-0.178902	0.074773	0.139137	-0.325457	-0.0323467	0.836188	0.722197	0.968171	0.976532
SERPINB4	finngen_R11_M13_RHEUMA	Rheumatoid arthritis || id:finngen_R11_M13_RHEUMA	SERPINB4++SCCA2_NA_SCCA2	Maximum likelihood	3	-0.187538	0.0714307	0.00865319	-0.327542	-0.0475343	0.828997	0.720693	0.953578	0.23638
SERPINB4	finngen_R11_M13_RHEUMA	Rheumatoid arthritis || id:finngen_R11_M13_RHEUMA	SERPINB4++SCCA2_NA_SCCA2	Simple mode	3	-0.176953	0.107772	0.242309	-0.388187	0.0342803	0.837819	0.678285	1.03487	0.994896
NT5E	finngen_R11_M13_RHEUMA	Rheumatoid arthritis || id:finngen_R11_M13_RHEUMA	NT5E++5__Nucleotidase	Inverse variance weighted	4	0.091762	0.0343243	0.00750906	0.0244864	0.159038	1.0961	1.02479	1.17238	0.31646
NT5E	finngen_R11_M13_RHEUMA	Rheumatoid arthritis || id:finngen_R11_M13_RHEUMA	NT5E++5__Nucleotidase	MR Egger	4	0.0427005	0.0514518	0.493877	-0.0581451	0.143546	1.04363	0.943513	1.15436	0.999671
NT5E	finngen_R11_M13_RHEUMA	Rheumatoid arthritis || id:finngen_R11_M13_RHEUMA	NT5E++5__Nucleotidase	Weighted median	4	0.0884806	0.0350347	0.0115528	0.0198127	0.157149	1.09251	1.02001	1.17017	0.362931
NT5E	finngen_R11_M13_RHEUMA	Rheumatoid arthritis || id:finngen_R11_M13_RHEUMA	NT5E++5__Nucleotidase	Weighted mode	4	0.0704118	0.038513	0.164956	-0.00507371	0.145897	1.07295	0.994939	1.15708	0.976532
NT5E	finngen_R11_M13_RHEUMA	Rheumatoid arthritis || id:finngen_R11_M13_RHEUMA	NT5E++5__Nucleotidase	Maximum likelihood	4	0.0918052	0.0343634	0.00754901	0.024453	0.159157	1.09615	1.02475	1.17252	0.222497
NT5E	finngen_R11_M13_RHEUMA	Rheumatoid arthritis || id:finngen_R11_M13_RHEUMA	NT5E++5__Nucleotidase	Simple mode	4	0.219883	0.0787857	0.0683675	0.0654634	0.374303	1.24593	1.06765	1.45398	0.994896
AMBP	finngen_R11_M13_RHEUMA	Rheumatoid arthritis || id:finngen_R11_M13_RHEUMA	AMBP++a1_Microglobulin	Inverse variance weighted	2	-0.155082	0.107879	0.15056	-0.366525	0.0563606	0.856345	0.693139	1.05798	0.87959
AMBP	finngen_R11_M13_RHEUMA	Rheumatoid arthritis || id:finngen_R11_M13_RHEUMA	AMBP++a1_Microglobulin	Maximum likelihood	2	-0.155125	0.108509	0.152832	-0.367803	0.0575535	0.856308	0.692253	1.05924	0.69021
CD8A	finngen_R11_M13_RHEUMA	Rheumatoid arthritis || id:finngen_R11_M13_RHEUMA	CD8A++CD8A_NA_CD8A	Inverse variance weighted	2	0.0828598	0.051199	0.105579	-0.0174903	0.18321	1.08639	0.982662	1.20107	0.795084
CD8A	finngen_R11_M13_RHEUMA	Rheumatoid arthritis || id:finngen_R11_M13_RHEUMA	CD8A++CD8A_NA_CD8A	Maximum likelihood	2	0.0828776	0.0512232	0.105669	-0.0175199	0.183275	1.08641	0.982633	1.20114	0.613211
COL9A1	finngen_R11_M13_RHEUMA	Rheumatoid arthritis || id:finngen_R11_M13_RHEUMA	COL9A1++CO9A1_NA_CO9A1	Inverse variance weighted	2	-0.0864405	0.166781	0.604259	-0.413332	0.240451	0.91719	0.661443	1.27182	0.990373
COL9A1	finngen_R11_M13_RHEUMA	Rheumatoid arthritis || id:finngen_R11_M13_RHEUMA	COL9A1++CO9A1_NA_CO9A1	Maximum likelihood	2	-0.0868523	0.167239	0.60353	-0.41464	0.240936	0.916812	0.660578	1.27244	0.925963
CFHR1	finngen_R11_M13_RHEUMA	Rheumatoid arthritis || id:finngen_R11_M13_RHEUMA	CFHR1++FHR1_NA_FHR1	Inverse variance weighted	6	-0.0203441	0.0351342	0.562562	-0.0892071	0.0485189	0.979861	0.914656	1.04972	0.990373
CFHR1	finngen_R11_M13_RHEUMA	Rheumatoid arthritis || id:finngen_R11_M13_RHEUMA	CFHR1++FHR1_NA_FHR1	MR Egger	6	-0.125382	0.058043	0.096872	-0.239146	-0.0116177	0.88216	0.7873	0.988449	0.999671
CFHR1	finngen_R11_M13_RHEUMA	Rheumatoid arthritis || id:finngen_R11_M13_RHEUMA	CFHR1++FHR1_NA_FHR1	Weighted median	6	-0.0289526	0.031828	0.363004	-0.0913355	0.0334304	0.971463	0.912711	1.034	0.88643
CFHR1	finngen_R11_M13_RHEUMA	Rheumatoid arthritis || id:finngen_R11_M13_RHEUMA	CFHR1++FHR1_NA_FHR1	Weighted mode	6	-0.0273106	0.0319475	0.431673	-0.0899277	0.0353065	0.973059	0.913997	1.03594	0.976532
CFHR1	finngen_R11_M13_RHEUMA	Rheumatoid arthritis || id:finngen_R11_M13_RHEUMA	CFHR1++FHR1_NA_FHR1	Maximum likelihood	6	-0.0203664	0.0304522	0.503623	-0.0800528	0.0393199	0.97984	0.923068	1.0401	0.9072
CFHR1	finngen_R11_M13_RHEUMA	Rheumatoid arthritis || id:finngen_R11_M13_RHEUMA	CFHR1++FHR1_NA_FHR1	Simple mode	6	-0.0187448	0.0607451	0.770083	-0.137805	0.100316	0.98143	0.871268	1.10552	0.994896
HEXB	finngen_R11_M13_RHEUMA	Rheumatoid arthritis || id:finngen_R11_M13_RHEUMA	HEXB++Hexosaminidase_B	Inverse variance weighted	2	0.0504505	0.0488972	0.302182	-0.0453881	0.146289	1.05174	0.955627	1.15753	0.986776
HEXB	finngen_R11_M13_RHEUMA	Rheumatoid arthritis || id:finngen_R11_M13_RHEUMA	HEXB++Hexosaminidase_B	Maximum likelihood	2	0.0504969	0.0489452	0.302212	-0.0454357	0.14643	1.05179	0.955581	1.15769	0.834962
VNN2	finngen_R11_M13_RHEUMA	Rheumatoid arthritis || id:finngen_R11_M13_RHEUMA	VNN2++VNN2_NA_VNN2	Inverse variance weighted	11	0.0105016	0.0254921	0.680372	-0.0394629	0.060466	1.01056	0.961306	1.06233	0.990373
VNN2	finngen_R11_M13_RHEUMA	Rheumatoid arthritis || id:finngen_R11_M13_RHEUMA	VNN2++VNN2_NA_VNN2	MR Egger	11	0.0431772	0.0894235	0.640738	-0.132093	0.218447	1.04412	0.87626	1.24414	0.999671
VNN2	finngen_R11_M13_RHEUMA	Rheumatoid arthritis || id:finngen_R11_M13_RHEUMA	VNN2++VNN2_NA_VNN2	Weighted median	11	0.0246984	0.0220112	0.261827	-0.0184436	0.0678404	1.02501	0.981725	1.07019	0.866995
VNN2	finngen_R11_M13_RHEUMA	Rheumatoid arthritis || id:finngen_R11_M13_RHEUMA	VNN2++VNN2_NA_VNN2	Weighted mode	11	0.026768	0.0237681	0.286375	-0.0198175	0.0733535	1.02713	0.980378	1.07611	0.976532
VNN2	finngen_R11_M13_RHEUMA	Rheumatoid arthritis || id:finngen_R11_M13_RHEUMA	VNN2++VNN2_NA_VNN2	Maximum likelihood	11	0.0105438	0.0201346	0.600511	-0.02892	0.0500076	1.0106	0.971494	1.05128	0.925963
VNN2	finngen_R11_M13_RHEUMA	Rheumatoid arthritis || id:finngen_R11_M13_RHEUMA	VNN2++VNN2_NA_VNN2	Simple mode	11	0.0716702	0.0756372	0.365693	-0.0765787	0.219919	1.0743	0.92628	1.24598	0.994896
CAMP	finngen_R11_M13_RHEUMA	Rheumatoid arthritis || id:finngen_R11_M13_RHEUMA	CAMP++LL_37	Wald ratio	1	0.131735	0.13761	0.338413	-0.137981	0.401451	1.14081	0.871115	1.49399	0.772525
CES1	finngen_R11_M13_RHEUMA	Rheumatoid arthritis || id:finngen_R11_M13_RHEUMA	CES1++carboxylesterase__liver	Wald ratio	1	-0.423657	0.241969	0.0799675	-0.897915	0.0506017	0.654649	0.407418	1.0519	0.541774
CD248	finngen_R11_M13_RHEUMA	Rheumatoid arthritis || id:finngen_R11_M13_RHEUMA	CD248++CD248_NA_CD248	Inverse variance weighted	2	0.0873216	0.127594	0.49374	-0.162762	0.337405	1.09125	0.849794	1.40131	0.990373
CD248	finngen_R11_M13_RHEUMA	Rheumatoid arthritis || id:finngen_R11_M13_RHEUMA	CD248++CD248_NA_CD248	Maximum likelihood	2	0.0891948	0.115081	0.438305	-0.136365	0.314754	1.09329	0.872524	1.36992	0.894531
FGFBP1	finngen_R11_M13_RHEUMA	Rheumatoid arthritis || id:finngen_R11_M13_RHEUMA	FGFBP1++FGFP1_NA_FGFP1	Wald ratio	1	0.0488987	0.195471	0.802465	-0.334225	0.432022	1.05011	0.715893	1.54037	0.942981
FOLR3	finngen_R11_M13_RHEUMA	Rheumatoid arthritis || id:finngen_R11_M13_RHEUMA	FOLR3++FOLR3_NA_FOLR3	Inverse variance weighted	9	0.0180558	0.0231447	0.435317	-0.0273079	0.0634195	1.01822	0.973062	1.06547	0.990373
FOLR3	finngen_R11_M13_RHEUMA	Rheumatoid arthritis || id:finngen_R11_M13_RHEUMA	FOLR3++FOLR3_NA_FOLR3	MR Egger	9	0.00103304	0.035495	0.977594	-0.0685372	0.0706033	1.00103	0.933759	1.07316	0.999671
FOLR3	finngen_R11_M13_RHEUMA	Rheumatoid arthritis || id:finngen_R11_M13_RHEUMA	FOLR3++FOLR3_NA_FOLR3	Weighted median	9	0.021982	0.0267413	0.411064	-0.030431	0.0743949	1.02223	0.970027	1.07723	0.88643
FOLR3	finngen_R11_M13_RHEUMA	Rheumatoid arthritis || id:finngen_R11_M13_RHEUMA	FOLR3++FOLR3_NA_FOLR3	Weighted mode	9	0.0188145	0.0242383	0.459944	-0.0286925	0.0663216	1.01899	0.971715	1.06857	0.976532
FOLR3	finngen_R11_M13_RHEUMA	Rheumatoid arthritis || id:finngen_R11_M13_RHEUMA	FOLR3++FOLR3_NA_FOLR3	Maximum likelihood	9	0.018114	0.0218635	0.407386	-0.0247385	0.0609664	1.01828	0.975565	1.06286	0.890655
FOLR3	finngen_R11_M13_RHEUMA	Rheumatoid arthritis || id:finngen_R11_M13_RHEUMA	FOLR3++FOLR3_NA_FOLR3	Simple mode	9	0.0489586	0.0472787	0.330706	-0.0437077	0.141625	1.05018	0.957234	1.15214	0.994896
ATRN	finngen_R11_M13_RHEUMA	Rheumatoid arthritis || id:finngen_R11_M13_RHEUMA	ATRN++Attractin_NA_Attractin	Inverse variance weighted	6	-0.0442153	0.0408432	0.279002	-0.124268	0.0358373	0.956748	0.883143	1.03649	0.982649
ATRN	finngen_R11_M13_RHEUMA	Rheumatoid arthritis || id:finngen_R11_M13_RHEUMA	ATRN++Attractin_NA_Attractin	MR Egger	6	-0.0191175	0.0701325	0.798661	-0.156577	0.118342	0.981064	0.855066	1.12563	0.999671
ATRN	finngen_R11_M13_RHEUMA	Rheumatoid arthritis || id:finngen_R11_M13_RHEUMA	ATRN++Attractin_NA_Attractin	Weighted median	6	-0.0119683	0.0407353	0.768906	-0.0918096	0.067873	0.988103	0.912279	1.07023	0.982685
ATRN	finngen_R11_M13_RHEUMA	Rheumatoid arthritis || id:finngen_R11_M13_RHEUMA	ATRN++Attractin_NA_Attractin	Weighted mode	6	-0.00227902	0.0423152	0.959134	-0.0852169	0.0806588	0.997724	0.918313	1.084	0.989001
ATRN	finngen_R11_M13_RHEUMA	Rheumatoid arthritis || id:finngen_R11_M13_RHEUMA	ATRN++Attractin_NA_Attractin	Maximum likelihood	6	-0.0443691	0.0317157	0.161824	-0.106532	0.0177936	0.956601	0.898946	1.01795	0.699288
ATRN	finngen_R11_M13_RHEUMA	Rheumatoid arthritis || id:finngen_R11_M13_RHEUMA	ATRN++Attractin_NA_Attractin	Simple mode	6	-0.037592	0.0902763	0.694381	-0.214534	0.13935	0.963106	0.806918	1.14953	0.994896
LRP12	finngen_R11_M13_RHEUMA	Rheumatoid arthritis || id:finngen_R11_M13_RHEUMA	LRP12++LRP12_NA_LRP12	Inverse variance weighted	2	0.216431	0.182057	0.234514	-0.1404	0.573263	1.24164	0.86901	1.77405	0.944804
LRP12	finngen_R11_M13_RHEUMA	Rheumatoid arthritis || id:finngen_R11_M13_RHEUMA	LRP12++LRP12_NA_LRP12	Maximum likelihood	2	0.218023	0.184545	0.237441	-0.143686	0.579732	1.24362	0.86616	1.78556	0.7864
PRSS8	finngen_R11_M13_RHEUMA	Rheumatoid arthritis || id:finngen_R11_M13_RHEUMA	PRSS8++Prostasin_NA_Prostasin	Inverse variance weighted	2	0.157998	0.20251	0.435272	-0.23892	0.554917	1.17116	0.787478	1.7418	0.990373
PRSS8	finngen_R11_M13_RHEUMA	Rheumatoid arthritis || id:finngen_R11_M13_RHEUMA	PRSS8++Prostasin_NA_Prostasin	Maximum likelihood	2	0.161428	0.12885	0.210265	-0.0911183	0.413975	1.17519	0.91291	1.51282	0.775689
BCHE	finngen_R11_M13_RHEUMA	Rheumatoid arthritis || id:finngen_R11_M13_RHEUMA	BCHE++Pseudocholinesterase_NA_Pseudocholinesterase	Inverse variance weighted	5	0.0415494	0.0372129	0.264194	-0.0313878	0.114487	1.04242	0.9691	1.1213	0.982649
BCHE	finngen_R11_M13_RHEUMA	Rheumatoid arthritis || id:finngen_R11_M13_RHEUMA	BCHE++Pseudocholinesterase_NA_Pseudocholinesterase	MR Egger	5	0.0172755	0.142104	0.910926	-0.261249	0.2958	1.01743	0.770089	1.3442	0.999671
BCHE	finngen_R11_M13_RHEUMA	Rheumatoid arthritis || id:finngen_R11_M13_RHEUMA	BCHE++Pseudocholinesterase_NA_Pseudocholinesterase	Weighted median	5	0.0395523	0.0344051	0.250306	-0.0278817	0.106986	1.04034	0.972503	1.11292	0.858342
BCHE	finngen_R11_M13_RHEUMA	Rheumatoid arthritis || id:finngen_R11_M13_RHEUMA	BCHE++Pseudocholinesterase_NA_Pseudocholinesterase	Weighted mode	5	0.028883	0.0342326	0.446325	-0.0382129	0.0959789	1.0293	0.962508	1.10074	0.976532
BCHE	finngen_R11_M13_RHEUMA	Rheumatoid arthritis || id:finngen_R11_M13_RHEUMA	BCHE++Pseudocholinesterase_NA_Pseudocholinesterase	Maximum likelihood	5	0.0416665	0.0314706	0.185509	-0.0200158	0.103349	1.04255	0.980183	1.10888	0.740146
BCHE	finngen_R11_M13_RHEUMA	Rheumatoid arthritis || id:finngen_R11_M13_RHEUMA	BCHE++Pseudocholinesterase_NA_Pseudocholinesterase	Simple mode	5	0.110918	0.0655066	0.165663	-0.0174746	0.239311	1.1173	0.982677	1.27037	0.994896
SAA1	finngen_R11_M13_RHEUMA	Rheumatoid arthritis || id:finngen_R11_M13_RHEUMA	SAA1++SAA_NA_SAA	Inverse variance weighted	4	-0.0493544	0.0260766	0.0584014	-0.100464	0.00175567	0.951844	0.904417	1.00176	0.705108
SAA1	finngen_R11_M13_RHEUMA	Rheumatoid arthritis || id:finngen_R11_M13_RHEUMA	SAA1++SAA_NA_SAA	MR Egger	4	-0.0540794	0.0353565	0.265753	-0.123378	0.0152194	0.947357	0.883929	1.01534	0.999671
SAA1	finngen_R11_M13_RHEUMA	Rheumatoid arthritis || id:finngen_R11_M13_RHEUMA	SAA1++SAA_NA_SAA	Weighted median	4	-0.0458857	0.0274881	0.0950593	-0.0997625	0.00799099	0.955151	0.905052	1.00802	0.680294
SAA1	finngen_R11_M13_RHEUMA	Rheumatoid arthritis || id:finngen_R11_M13_RHEUMA	SAA1++SAA_NA_SAA	Weighted mode	4	-0.0465191	0.0270173	0.18358	-0.099473	0.00643484	0.954546	0.905314	1.00646	0.976532
SAA1	finngen_R11_M13_RHEUMA	Rheumatoid arthritis || id:finngen_R11_M13_RHEUMA	SAA1++SAA_NA_SAA	Maximum likelihood	4	-0.0493773	0.0260942	0.0584551	-0.100522	0.00176737	0.951822	0.904365	1.00177	0.516226
SAA1	finngen_R11_M13_RHEUMA	Rheumatoid arthritis || id:finngen_R11_M13_RHEUMA	SAA1++SAA_NA_SAA	Simple mode	4	-0.0501231	0.0567183	0.441928	-0.161291	0.0610448	0.951112	0.851044	1.06295	0.994896
SAA4	finngen_R11_M13_RHEUMA	Rheumatoid arthritis || id:finngen_R11_M13_RHEUMA	SAA4++SAA_4	Inverse variance weighted	7	0.0441198	0.0227013	0.0519565	-0.000374704	0.0886143	1.04511	0.999625	1.09266	0.686968
SAA4	finngen_R11_M13_RHEUMA	Rheumatoid arthritis || id:finngen_R11_M13_RHEUMA	SAA4++SAA_4	MR Egger	7	0.0357405	0.0360972	0.36758	-0.0350099	0.106491	1.03639	0.965596	1.11237	0.999671
SAA4	finngen_R11_M13_RHEUMA	Rheumatoid arthritis || id:finngen_R11_M13_RHEUMA	SAA4++SAA_4	Weighted median	7	0.0364692	0.0256021	0.154313	-0.0137109	0.0866493	1.03714	0.986383	1.09051	0.814013
SAA4	finngen_R11_M13_RHEUMA	Rheumatoid arthritis || id:finngen_R11_M13_RHEUMA	SAA4++SAA_4	Weighted mode	7	0.0350142	0.0258238	0.22394	-0.0156003	0.0856288	1.03563	0.984521	1.0894	0.976532
SAA4	finngen_R11_M13_RHEUMA	Rheumatoid arthritis || id:finngen_R11_M13_RHEUMA	SAA4++SAA_4	Maximum likelihood	7	0.0441878	0.022714	0.0517266	-0.000331567	0.0887072	1.04518	0.999668	1.09276	0.510732
SAA4	finngen_R11_M13_RHEUMA	Rheumatoid arthritis || id:finngen_R11_M13_RHEUMA	SAA4++SAA_4	Simple mode	7	0.0232393	0.0424806	0.604075	-0.0600227	0.106501	1.02351	0.941743	1.11238	0.994896
CLSTN1	finngen_R11_M13_RHEUMA	Rheumatoid arthritis || id:finngen_R11_M13_RHEUMA	CLSTN1++Alcadein_alpha_1	Inverse variance weighted	6	-0.0275572	0.0375829	0.463413	-0.10122	0.0461052	0.972819	0.903734	1.04718	0.990373
CLSTN1	finngen_R11_M13_RHEUMA	Rheumatoid arthritis || id:finngen_R11_M13_RHEUMA	CLSTN1++Alcadein_alpha_1	MR Egger	6	-0.0482702	0.0439407	0.333653	-0.134394	0.0378536	0.952876	0.874245	1.03858	0.999671
CLSTN1	finngen_R11_M13_RHEUMA	Rheumatoid arthritis || id:finngen_R11_M13_RHEUMA	CLSTN1++Alcadein_alpha_1	Weighted median	6	-0.0320543	0.0411389	0.435879	-0.112687	0.048578	0.968454	0.893431	1.04978	0.901327
CLSTN1	finngen_R11_M13_RHEUMA	Rheumatoid arthritis || id:finngen_R11_M13_RHEUMA	CLSTN1++Alcadein_alpha_1	Weighted mode	6	-0.0329362	0.0384975	0.43133	-0.108391	0.0425189	0.9676	0.897276	1.04344	0.976532
CLSTN1	finngen_R11_M13_RHEUMA	Rheumatoid arthritis || id:finngen_R11_M13_RHEUMA	CLSTN1++Alcadein_alpha_1	Maximum likelihood	6	-0.0276312	0.0376445	0.462947	-0.101415	0.0461521	0.972747	0.903558	1.04723	0.900174
CLSTN1	finngen_R11_M13_RHEUMA	Rheumatoid arthritis || id:finngen_R11_M13_RHEUMA	CLSTN1++Alcadein_alpha_1	Simple mode	6	-0.0439089	0.0768557	0.592507	-0.194546	0.106728	0.957041	0.823208	1.11263	0.994896
GLIPR2	finngen_R11_M13_RHEUMA	Rheumatoid arthritis || id:finngen_R11_M13_RHEUMA	GLIPR2++GAPR1_NA_GAPR1	Inverse variance weighted	2	0.0640949	0.0581567	0.270415	-0.0498923	0.178082	1.06619	0.951332	1.19492	0.982649
GLIPR2	finngen_R11_M13_RHEUMA	Rheumatoid arthritis || id:finngen_R11_M13_RHEUMA	GLIPR2++GAPR1_NA_GAPR1	Maximum likelihood	2	0.0641856	0.0478094	0.179423	-0.0295207	0.157892	1.06629	0.970911	1.17104	0.725467
ADH1C	finngen_R11_M13_RHEUMA	Rheumatoid arthritis || id:finngen_R11_M13_RHEUMA	ADH1C++ADH1G_NA_ADH1G	Wald ratio	1	0.239034	0.0958632	0.0126492	0.0511426	0.426926	1.27002	1.05247	1.53254	0.210117
CSRP1	finngen_R11_M13_RHEUMA	Rheumatoid arthritis || id:finngen_R11_M13_RHEUMA	CSRP1++Cysteine_rich_protein_1	Wald ratio	1	-0.0845019	0.128323	0.510209	-0.336014	0.16701	0.91897	0.714613	1.18177	0.853226
EPHB4	finngen_R11_M13_RHEUMA	Rheumatoid arthritis || id:finngen_R11_M13_RHEUMA	EPHB4++EphB4_NA_EphB4	Inverse variance weighted	2	0.0764018	0.160448	0.633948	-0.238076	0.39088	1.0794	0.788142	1.47828	0.990373
EPHB4	finngen_R11_M13_RHEUMA	Rheumatoid arthritis || id:finngen_R11_M13_RHEUMA	EPHB4++EphB4_NA_EphB4	Maximum likelihood	2	0.0770449	0.102931	0.454151	-0.124699	0.278789	1.08009	0.882762	1.32153	0.895805
MSR1	finngen_R11_M13_RHEUMA	Rheumatoid arthritis || id:finngen_R11_M13_RHEUMA	MSR1++Macrophage_scavenger_receptor	Inverse variance weighted	5	-0.0820881	0.0327661	0.0122355	-0.14631	-0.0178666	0.921191	0.86389	0.982292	0.404519
MSR1	finngen_R11_M13_RHEUMA	Rheumatoid arthritis || id:finngen_R11_M13_RHEUMA	MSR1++Macrophage_scavenger_receptor	MR Egger	5	-0.0685139	0.0407176	0.19103	-0.14832	0.0112925	0.93378	0.862155	1.01136	0.999671
MSR1	finngen_R11_M13_RHEUMA	Rheumatoid arthritis || id:finngen_R11_M13_RHEUMA	MSR1++Macrophage_scavenger_receptor	Weighted median	5	-0.0813881	0.0353092	0.021166	-0.150594	-0.012182	0.921836	0.860197	0.987892	0.405107
MSR1	finngen_R11_M13_RHEUMA	Rheumatoid arthritis || id:finngen_R11_M13_RHEUMA	MSR1++Macrophage_scavenger_receptor	Weighted mode	5	-0.0829953	0.0373062	0.0901397	-0.156115	-0.00987508	0.920355	0.85546	0.990174	0.976532
MSR1	finngen_R11_M13_RHEUMA	Rheumatoid arthritis || id:finngen_R11_M13_RHEUMA	MSR1++Macrophage_scavenger_receptor	Maximum likelihood	5	-0.0821798	0.0328455	0.0123489	-0.146557	-0.0178027	0.921106	0.863677	0.982355	0.283852
MSR1	finngen_R11_M13_RHEUMA	Rheumatoid arthritis || id:finngen_R11_M13_RHEUMA	MSR1++Macrophage_scavenger_receptor	Simple mode	5	-0.0965871	0.053853	0.147343	-0.202139	0.00896471	0.907931	0.816981	1.00901	0.994896
SLITRK1	finngen_R11_M13_RHEUMA	Rheumatoid arthritis || id:finngen_R11_M13_RHEUMA	SLITRK1++SLIK1_NA_SLIK1	Wald ratio	1	-0.15006	0.225022	0.504857	-0.591103	0.290983	0.860657	0.553716	1.33774	0.853181
VIM	finngen_R11_M13_RHEUMA	Rheumatoid arthritis || id:finngen_R11_M13_RHEUMA	VIM++Vimentin_NA_Vimentin	Inverse variance weighted	2	0.00667652	0.175127	0.969589	-0.336572	0.349925	1.0067	0.714215	1.41896	0.998932
VIM	finngen_R11_M13_RHEUMA	Rheumatoid arthritis || id:finngen_R11_M13_RHEUMA	VIM++Vimentin_NA_Vimentin	Maximum likelihood	2	0.00677096	0.147001	0.963262	-0.28135	0.294892	1.00679	0.754764	1.34298	0.991593
KLK14	finngen_R11_M13_RHEUMA	Rheumatoid arthritis || id:finngen_R11_M13_RHEUMA	KLK14++kallikrein_14	Inverse variance weighted	5	-0.0212829	0.0457084	0.641485	-0.110871	0.0683056	0.978942	0.895054	1.07069	0.990373
KLK14	finngen_R11_M13_RHEUMA	Rheumatoid arthritis || id:finngen_R11_M13_RHEUMA	KLK14++kallikrein_14	MR Egger	5	-0.039852	0.0900143	0.687939	-0.21628	0.136576	0.960932	0.80551	1.14634	0.999671
KLK14	finngen_R11_M13_RHEUMA	Rheumatoid arthritis || id:finngen_R11_M13_RHEUMA	KLK14++kallikrein_14	Weighted median	5	-0.0512467	0.0550437	0.351844	-0.159132	0.0566389	0.950044	0.852884	1.05827	0.88643
KLK14	finngen_R11_M13_RHEUMA	Rheumatoid arthritis || id:finngen_R11_M13_RHEUMA	KLK14++kallikrein_14	Weighted mode	5	-0.075334	0.0679668	0.329846	-0.208549	0.0578808	0.927434	0.811761	1.05959	0.976532
KLK14	finngen_R11_M13_RHEUMA	Rheumatoid arthritis || id:finngen_R11_M13_RHEUMA	KLK14++kallikrein_14	Maximum likelihood	5	-0.0213245	0.0457622	0.641227	-0.111018	0.0683695	0.978901	0.894922	1.07076	0.930695
KLK14	finngen_R11_M13_RHEUMA	Rheumatoid arthritis || id:finngen_R11_M13_RHEUMA	KLK14++kallikrein_14	Simple mode	5	-0.0772711	0.079915	0.388341	-0.233905	0.0793624	0.925639	0.791437	1.0826	0.994896
ANTXR2	finngen_R11_M13_RHEUMA	Rheumatoid arthritis || id:finngen_R11_M13_RHEUMA	ANTXR2++ANTR2_NA_ANTR2	Inverse variance weighted	3	0.0891875	0.0942395	0.343948	-0.0955218	0.273897	1.09329	0.908899	1.31508	0.990373
ANTXR2	finngen_R11_M13_RHEUMA	Rheumatoid arthritis || id:finngen_R11_M13_RHEUMA	ANTXR2++ANTR2_NA_ANTR2	MR Egger	3	0.0341614	0.230218	0.906218	-0.417066	0.485389	1.03475	0.658977	1.62481	0.999671
ANTXR2	finngen_R11_M13_RHEUMA	Rheumatoid arthritis || id:finngen_R11_M13_RHEUMA	ANTXR2++ANTR2_NA_ANTR2	Weighted median	3	0.0691852	0.0724641	0.339703	-0.0728445	0.211215	1.07163	0.929745	1.23518	0.88643
ANTXR2	finngen_R11_M13_RHEUMA	Rheumatoid arthritis || id:finngen_R11_M13_RHEUMA	ANTXR2++ANTR2_NA_ANTR2	Weighted mode	3	0.0622204	0.0740257	0.489086	-0.08287	0.207311	1.0642	0.920471	1.23037	0.976532
ANTXR2	finngen_R11_M13_RHEUMA	Rheumatoid arthritis || id:finngen_R11_M13_RHEUMA	ANTXR2++ANTR2_NA_ANTR2	Maximum likelihood	3	0.0895906	0.0706535	0.204788	-0.0488903	0.228072	1.09373	0.952286	1.25618	0.775689
ANTXR2	finngen_R11_M13_RHEUMA	Rheumatoid arthritis || id:finngen_R11_M13_RHEUMA	ANTXR2++ANTR2_NA_ANTR2	Simple mode	3	0.112423	0.147085	0.524529	-0.175863	0.400709	1.11899	0.838733	1.49288	0.994896
GUSB	finngen_R11_M13_RHEUMA	Rheumatoid arthritis || id:finngen_R11_M13_RHEUMA	GUSB++BGLR_NA_BGLR	Inverse variance weighted	2	0.102987	0.0893868	0.24926	-0.0722111	0.278185	1.10848	0.930334	1.32073	0.95935
GUSB	finngen_R11_M13_RHEUMA	Rheumatoid arthritis || id:finngen_R11_M13_RHEUMA	GUSB++BGLR_NA_BGLR	Maximum likelihood	2	0.103107	0.0778433	0.185321	-0.0494656	0.25568	1.10861	0.951738	1.29134	0.740146
MUC16	finngen_R11_M13_RHEUMA	Rheumatoid arthritis || id:finngen_R11_M13_RHEUMA	MUC16++CA125_NA_CA125	Wald ratio	1	-0.00681987	0.100542	0.94592	-0.203883	0.190243	0.993203	0.815558	1.20954	0.981147
CR2	finngen_R11_M13_RHEUMA	Rheumatoid arthritis || id:finngen_R11_M13_RHEUMA	CR2++Complement_receptor_type_2	Inverse variance weighted	5	-0.152718	0.0682349	0.0252133	-0.286458	-0.0189774	0.858372	0.750919	0.981202	0.526563
CR2	finngen_R11_M13_RHEUMA	Rheumatoid arthritis || id:finngen_R11_M13_RHEUMA	CR2++Complement_receptor_type_2	MR Egger	5	-0.0693067	0.130067	0.631079	-0.324237	0.185624	0.93304	0.723079	1.20397	0.999671
CR2	finngen_R11_M13_RHEUMA	Rheumatoid arthritis || id:finngen_R11_M13_RHEUMA	CR2++Complement_receptor_type_2	Weighted median	5	-0.154463	0.083632	0.0647566	-0.318382	0.00945586	0.856875	0.727325	1.0095	0.592163
CR2	finngen_R11_M13_RHEUMA	Rheumatoid arthritis || id:finngen_R11_M13_RHEUMA	CR2++Complement_receptor_type_2	Weighted mode	5	-0.129266	0.086921	0.211179	-0.299631	0.0410993	0.87874	0.741092	1.04196	0.976532
CR2	finngen_R11_M13_RHEUMA	Rheumatoid arthritis || id:finngen_R11_M13_RHEUMA	CR2++Complement_receptor_type_2	Maximum likelihood	5	-0.152971	0.0684578	0.0254478	-0.287149	-0.0187942	0.858154	0.7504	0.981381	0.37502
CR2	finngen_R11_M13_RHEUMA	Rheumatoid arthritis || id:finngen_R11_M13_RHEUMA	CR2++Complement_receptor_type_2	Simple mode	5	-0.209925	0.124138	0.166085	-0.453235	0.0333847	0.810645	0.635569	1.03395	0.994896
NCAN	finngen_R11_M13_RHEUMA	Rheumatoid arthritis || id:finngen_R11_M13_RHEUMA	NCAN++CSPG3_NA_CSPG3	Inverse variance weighted	2	-0.0650388	0.0687704	0.344282	-0.199829	0.0697512	0.937031	0.818871	1.07224	0.990373
NCAN	finngen_R11_M13_RHEUMA	Rheumatoid arthritis || id:finngen_R11_M13_RHEUMA	NCAN++CSPG3_NA_CSPG3	Maximum likelihood	2	-0.065072	0.0688555	0.344633	-0.200029	0.0698849	0.937	0.818707	1.07238	0.867419
ENPP6	finngen_R11_M13_RHEUMA	Rheumatoid arthritis || id:finngen_R11_M13_RHEUMA	ENPP6++ENPP6_NA_ENPP6	Wald ratio	1	0.478246	0.22743	0.0354812	0.0324824	0.92401	1.61324	1.03302	2.51937	0.381769
FCRLB	finngen_R11_M13_RHEUMA	Rheumatoid arthritis || id:finngen_R11_M13_RHEUMA	FCRLB++FCRLB_NA_FCRLB	Inverse variance weighted (multiplicative random effects)	4	0.0968827	0.0622464	0.119604	-0.0251202	0.218886	1.10173	0.975193	1.24469	0.825523
FCRLB	finngen_R11_M13_RHEUMA	Rheumatoid arthritis || id:finngen_R11_M13_RHEUMA	FCRLB++FCRLB_NA_FCRLB	MR Egger	4	0.110149	0.131314	0.489851	-0.147227	0.367525	1.11644	0.863098	1.44416	0.999671
FCRLB	finngen_R11_M13_RHEUMA	Rheumatoid arthritis || id:finngen_R11_M13_RHEUMA	FCRLB++FCRLB_NA_FCRLB	Weighted median	4	0.104294	0.0425246	0.0141846	0.0209456	0.187642	1.10993	1.02117	1.2064	0.364811
FCRLB	finngen_R11_M13_RHEUMA	Rheumatoid arthritis || id:finngen_R11_M13_RHEUMA	FCRLB++FCRLB_NA_FCRLB	Weighted mode	4	0.116021	0.0435445	0.0760511	0.0306737	0.201368	1.12302	1.03115	1.22307	0.976532
FCRLB	finngen_R11_M13_RHEUMA	Rheumatoid arthritis || id:finngen_R11_M13_RHEUMA	FCRLB++FCRLB_NA_FCRLB	Maximum likelihood	4	0.0974055	0.0363837	0.00742465	0.0260934	0.168718	1.10231	1.02644	1.18379	0.222497
FCRLB	finngen_R11_M13_RHEUMA	Rheumatoid arthritis || id:finngen_R11_M13_RHEUMA	FCRLB++FCRLB_NA_FCRLB	Simple mode	4	0.0301524	0.108826	0.79972	-0.183146	0.24345	1.03061	0.832647	1.27564	0.994896
CFHR2	finngen_R11_M13_RHEUMA	Rheumatoid arthritis || id:finngen_R11_M13_RHEUMA	CFHR2++FHR2_NA_FHR2	Inverse variance weighted	10	0.0275185	0.0288299	0.339824	-0.0289881	0.0840252	1.0279	0.971428	1.08766	0.990373
CFHR2	finngen_R11_M13_RHEUMA	Rheumatoid arthritis || id:finngen_R11_M13_RHEUMA	CFHR2++FHR2_NA_FHR2	MR Egger	10	0.076685	0.080251	0.367272	-0.0806071	0.233977	1.0797	0.922556	1.26362	0.999671
CFHR2	finngen_R11_M13_RHEUMA	Rheumatoid arthritis || id:finngen_R11_M13_RHEUMA	CFHR2++FHR2_NA_FHR2	Weighted median	10	0.00824048	0.0364736	0.821256	-0.0632477	0.0797287	1.00827	0.938711	1.08299	0.982685
CFHR2	finngen_R11_M13_RHEUMA	Rheumatoid arthritis || id:finngen_R11_M13_RHEUMA	CFHR2++FHR2_NA_FHR2	Weighted mode	10	0.00599526	0.042037	0.889733	-0.0763973	0.0883878	1.00601	0.926448	1.09241	0.984041
CFHR2	finngen_R11_M13_RHEUMA	Rheumatoid arthritis || id:finngen_R11_M13_RHEUMA	CFHR2++FHR2_NA_FHR2	Maximum likelihood	10	0.0275648	0.0254118	0.278045	-0.0222424	0.0773719	1.02795	0.978003	1.08044	0.823737
CFHR2	finngen_R11_M13_RHEUMA	Rheumatoid arthritis || id:finngen_R11_M13_RHEUMA	CFHR2++FHR2_NA_FHR2	Simple mode	10	0.0839927	0.0602096	0.19648	-0.0340181	0.202004	1.08762	0.966554	1.22385	0.994896
FBLN5	finngen_R11_M13_RHEUMA	Rheumatoid arthritis || id:finngen_R11_M13_RHEUMA	FBLN5++fibulin_5	Inverse variance weighted	2	-0.0635152	0.140393	0.650974	-0.338686	0.211655	0.93846	0.712706	1.23572	0.990373
FBLN5	finngen_R11_M13_RHEUMA	Rheumatoid arthritis || id:finngen_R11_M13_RHEUMA	FBLN5++fibulin_5	Maximum likelihood	2	-0.0636405	0.140636	0.650896	-0.339288	0.212007	0.938342	0.712277	1.23616	0.93286
FOLR2	finngen_R11_M13_RHEUMA	Rheumatoid arthritis || id:finngen_R11_M13_RHEUMA	FOLR2++FOLR2_NA_FOLR2	Inverse variance weighted	2	0.0224203	0.115666	0.846304	-0.204285	0.249126	1.02267	0.81523	1.2829	0.992378
FOLR2	finngen_R11_M13_RHEUMA	Rheumatoid arthritis || id:finngen_R11_M13_RHEUMA	FOLR2++FOLR2_NA_FOLR2	Maximum likelihood	2	0.0227652	0.0953118	0.811222	-0.164046	0.209576	1.02303	0.848703	1.23316	0.973773
GC	finngen_R11_M13_RHEUMA	Rheumatoid arthritis || id:finngen_R11_M13_RHEUMA	GC++Gc_Globulin__Mixed_Type	Wald ratio	1	0.0145253	0.108864	0.893856	-0.198848	0.227898	1.01463	0.819675	1.25596	0.959083
HTRA1	finngen_R11_M13_RHEUMA	Rheumatoid arthritis || id:finngen_R11_M13_RHEUMA	HTRA1++HTRA1_NA_HTRA1	Inverse variance weighted	2	0.142656	0.112269	0.203847	-0.0773906	0.362702	1.15333	0.925528	1.43721	0.927309
HTRA1	finngen_R11_M13_RHEUMA	Rheumatoid arthritis || id:finngen_R11_M13_RHEUMA	HTRA1++HTRA1_NA_HTRA1	Maximum likelihood	2	0.143086	0.112977	0.205332	-0.0783488	0.364521	1.15383	0.924642	1.43982	0.775689
HEXIM1	finngen_R11_M13_RHEUMA	Rheumatoid arthritis || id:finngen_R11_M13_RHEUMA	HEXIM1++HEXI1_NA_HEXI1	Wald ratio	1	-0.0169785	0.149403	0.909522	-0.309809	0.275852	0.983165	0.733587	1.31765	0.965239
ITGA2	finngen_R11_M13_RHEUMA	Rheumatoid arthritis || id:finngen_R11_M13_RHEUMA	ITGA2++Integrin_alpha_2	Wald ratio	1	-0.137914	0.141179	0.328632	-0.414624	0.138797	0.871174	0.660588	1.14889	0.768431
MAPK9	finngen_R11_M13_RHEUMA	Rheumatoid arthritis || id:finngen_R11_M13_RHEUMA	MAPK9++JNK2_NA_JNK2	Inverse variance weighted	2	0.0927193	0.0818718	0.257427	-0.0677494	0.253188	1.09715	0.934495	1.28813	0.970768
MAPK9	finngen_R11_M13_RHEUMA	Rheumatoid arthritis || id:finngen_R11_M13_RHEUMA	MAPK9++JNK2_NA_JNK2	Maximum likelihood	2	0.0927302	0.0819634	0.257904	-0.0679182	0.253378	1.09717	0.934337	1.28837	0.808464
PKLR	finngen_R11_M13_RHEUMA	Rheumatoid arthritis || id:finngen_R11_M13_RHEUMA	PKLR++KPYR_NA_KPYR	Inverse variance weighted	2	-0.142694	0.0888678	0.108341	-0.316875	0.0314863	0.867019	0.728422	1.03199	0.799653
PKLR	finngen_R11_M13_RHEUMA	Rheumatoid arthritis || id:finngen_R11_M13_RHEUMA	PKLR++KPYR_NA_KPYR	Maximum likelihood	2	-0.142761	0.0893154	0.109956	-0.317819	0.0322972	0.866961	0.727734	1.03282	0.618846
LAP3	finngen_R11_M13_RHEUMA	Rheumatoid arthritis || id:finngen_R11_M13_RHEUMA	LAP3++LAP_NA_LAP	Inverse variance weighted	3	0.0383101	0.0553101	0.488535	-0.0700977	0.146718	1.03905	0.932303	1.15803	0.990373
LAP3	finngen_R11_M13_RHEUMA	Rheumatoid arthritis || id:finngen_R11_M13_RHEUMA	LAP3++LAP_NA_LAP	MR Egger	3	0.0807593	0.0791927	0.493765	-0.0744585	0.235977	1.08411	0.928246	1.26615	0.999671
LAP3	finngen_R11_M13_RHEUMA	Rheumatoid arthritis || id:finngen_R11_M13_RHEUMA	LAP3++LAP_NA_LAP	Weighted median	3	0.0439067	0.0551066	0.42559	-0.0641021	0.151916	1.04488	0.937909	1.16406	0.894248
LAP3	finngen_R11_M13_RHEUMA	Rheumatoid arthritis || id:finngen_R11_M13_RHEUMA	LAP3++LAP_NA_LAP	Weighted mode	3	0.0451581	0.0557326	0.502871	-0.0640778	0.154394	1.04619	0.937932	1.16695	0.976532
LAP3	finngen_R11_M13_RHEUMA	Rheumatoid arthritis || id:finngen_R11_M13_RHEUMA	LAP3++LAP_NA_LAP	Maximum likelihood	3	0.0383122	0.055331	0.488674	-0.0701365	0.146761	1.03906	0.932267	1.15808	0.9072
LAP3	finngen_R11_M13_RHEUMA	Rheumatoid arthritis || id:finngen_R11_M13_RHEUMA	LAP3++LAP_NA_LAP	Simple mode	3	0.00971551	0.144105	0.952381	-0.27273	0.292161	1.00976	0.761298	1.33932	0.994896
PNLIP	finngen_R11_M13_RHEUMA	Rheumatoid arthritis || id:finngen_R11_M13_RHEUMA	PNLIP++LIPP_NA_LIPP	Inverse variance weighted	2	-0.0977727	0.204219	0.632107	-0.498043	0.302497	0.906855	0.607719	1.35323	0.990373
PNLIP	finngen_R11_M13_RHEUMA	Rheumatoid arthritis || id:finngen_R11_M13_RHEUMA	PNLIP++LIPP_NA_LIPP	Maximum likelihood	2	-0.0993638	0.113715	0.382231	-0.322246	0.123518	0.905413	0.72452	1.13147	0.886332
LILRA2	finngen_R11_M13_RHEUMA	Rheumatoid arthritis || id:finngen_R11_M13_RHEUMA	LILRA2++LIRA2_NA_LIRA2	Inverse variance weighted	7	-0.0498325	0.0387073	0.197948	-0.125699	0.0260337	0.951389	0.881881	1.02638	0.927309
LILRA2	finngen_R11_M13_RHEUMA	Rheumatoid arthritis || id:finngen_R11_M13_RHEUMA	LILRA2++LIRA2_NA_LIRA2	MR Egger	7	-0.0682959	0.0551198	0.270318	-0.176331	0.039739	0.933984	0.838341	1.04054	0.999671
LILRA2	finngen_R11_M13_RHEUMA	Rheumatoid arthritis || id:finngen_R11_M13_RHEUMA	LILRA2++LIRA2_NA_LIRA2	Weighted median	7	-0.0696142	0.0331101	0.035509	-0.13451	-0.00471839	0.932754	0.874144	0.995293	0.49532
LILRA2	finngen_R11_M13_RHEUMA	Rheumatoid arthritis || id:finngen_R11_M13_RHEUMA	LILRA2++LIRA2_NA_LIRA2	Weighted mode	7	-0.0701437	0.0311425	0.0652304	-0.131183	-0.00910443	0.93226	0.877057	0.990937	0.976532
LILRA2	finngen_R11_M13_RHEUMA	Rheumatoid arthritis || id:finngen_R11_M13_RHEUMA	LILRA2++LIRA2_NA_LIRA2	Maximum likelihood	7	-0.0499911	0.0269241	0.0633473	-0.102762	0.00278002	0.951238	0.902341	1.00278	0.52947
LILRA2	finngen_R11_M13_RHEUMA	Rheumatoid arthritis || id:finngen_R11_M13_RHEUMA	LILRA2++LIRA2_NA_LIRA2	Simple mode	7	-0.0830273	0.0491955	0.142437	-0.17945	0.0133958	0.920326	0.835729	1.01349	0.994896
LILRB3	finngen_R11_M13_RHEUMA	Rheumatoid arthritis || id:finngen_R11_M13_RHEUMA	LILRB3++LIRB3_NA_LIRB3	Inverse variance weighted	9	0.019451	0.0188863	0.303056	-0.0175661	0.0564682	1.01964	0.982587	1.05809	0.986776
LILRB3	finngen_R11_M13_RHEUMA	Rheumatoid arthritis || id:finngen_R11_M13_RHEUMA	LILRB3++LIRB3_NA_LIRB3	MR Egger	9	0.0295086	0.0402381	0.487173	-0.0493581	0.108375	1.02995	0.95184	1.11447	0.999671
LILRB3	finngen_R11_M13_RHEUMA	Rheumatoid arthritis || id:finngen_R11_M13_RHEUMA	LILRB3++LIRB3_NA_LIRB3	Weighted median	9	0.010761	0.0223324	0.629909	-0.0330105	0.0545325	1.01082	0.967528	1.05605	0.969453
LILRB3	finngen_R11_M13_RHEUMA	Rheumatoid arthritis || id:finngen_R11_M13_RHEUMA	LILRB3++LIRB3_NA_LIRB3	Weighted mode	9	0.0111386	0.0213936	0.61671	-0.0307929	0.0530701	1.0112	0.969676	1.0545	0.980099
LILRB3	finngen_R11_M13_RHEUMA	Rheumatoid arthritis || id:finngen_R11_M13_RHEUMA	LILRB3++LIRB3_NA_LIRB3	Maximum likelihood	9	0.019406	0.0188858	0.304165	-0.0176102	0.0564222	1.0196	0.982544	1.05804	0.834962
LILRB3	finngen_R11_M13_RHEUMA	Rheumatoid arthritis || id:finngen_R11_M13_RHEUMA	LILRB3++LIRB3_NA_LIRB3	Simple mode	9	0.0111386	0.0348506	0.757451	-0.0571685	0.0794457	1.0112	0.944435	1.08269	0.994896
NLGN1	finngen_R11_M13_RHEUMA	Rheumatoid arthritis || id:finngen_R11_M13_RHEUMA	NLGN1++NLGN1_NA_NLGN1	Inverse variance weighted	3	0.115107	0.0923377	0.21255	-0.0658751	0.296089	1.12199	0.936248	1.34459	0.927309
NLGN1	finngen_R11_M13_RHEUMA	Rheumatoid arthritis || id:finngen_R11_M13_RHEUMA	NLGN1++NLGN1_NA_NLGN1	MR Egger	3	1.05086	1.13754	0.525203	-1.17872	3.28044	2.86011	0.307672	26.5875	0.999671
NLGN1	finngen_R11_M13_RHEUMA	Rheumatoid arthritis || id:finngen_R11_M13_RHEUMA	NLGN1++NLGN1_NA_NLGN1	Weighted median	3	0.107056	0.0952074	0.260823	-0.0795507	0.293662	1.113	0.923531	1.34133	0.866995
NLGN1	finngen_R11_M13_RHEUMA	Rheumatoid arthritis || id:finngen_R11_M13_RHEUMA	NLGN1++NLGN1_NA_NLGN1	Weighted mode	3	0.0900827	0.101462	0.468294	-0.108782	0.288948	1.09426	0.896926	1.33502	0.976532
NLGN1	finngen_R11_M13_RHEUMA	Rheumatoid arthritis || id:finngen_R11_M13_RHEUMA	NLGN1++NLGN1_NA_NLGN1	Maximum likelihood	3	0.11535	0.0928081	0.213908	-0.0665535	0.297254	1.12227	0.935613	1.34616	0.777453
NLGN1	finngen_R11_M13_RHEUMA	Rheumatoid arthritis || id:finngen_R11_M13_RHEUMA	NLGN1++NLGN1_NA_NLGN1	Simple mode	3	0.256971	0.175662	0.281039	-0.0873278	0.601269	1.29301	0.916377	1.82443	0.994896
OPCML	finngen_R11_M13_RHEUMA	Rheumatoid arthritis || id:finngen_R11_M13_RHEUMA	OPCML++OBCAM_NA_OBCAM	Inverse variance weighted	3	0.0472707	0.124714	0.704664	-0.197169	0.291711	1.04841	0.821052	1.33872	0.990373
OPCML	finngen_R11_M13_RHEUMA	Rheumatoid arthritis || id:finngen_R11_M13_RHEUMA	OPCML++OBCAM_NA_OBCAM	MR Egger	3	0.655041	0.451492	0.384187	-0.229883	1.53996	1.92522	0.794627	4.66442	0.999671
OPCML	finngen_R11_M13_RHEUMA	Rheumatoid arthritis || id:finngen_R11_M13_RHEUMA	OPCML++OBCAM_NA_OBCAM	Weighted median	3	0.100723	0.109124	0.356	-0.11316	0.314607	1.10597	0.893007	1.36972	0.88643
OPCML	finngen_R11_M13_RHEUMA	Rheumatoid arthritis || id:finngen_R11_M13_RHEUMA	OPCML++OBCAM_NA_OBCAM	Weighted mode	3	0.143733	0.124027	0.366174	-0.0993607	0.386826	1.15458	0.905416	1.4723	0.976532
OPCML	finngen_R11_M13_RHEUMA	Rheumatoid arthritis || id:finngen_R11_M13_RHEUMA	OPCML++OBCAM_NA_OBCAM	Maximum likelihood	3	0.0479025	0.0978768	0.624547	-0.143936	0.239741	1.04907	0.865943	1.27092	0.929849
OPCML	finngen_R11_M13_RHEUMA	Rheumatoid arthritis || id:finngen_R11_M13_RHEUMA	OPCML++OBCAM_NA_OBCAM	Simple mode	3	0.0829333	0.204224	0.724005	-0.317346	0.483213	1.08647	0.728079	1.62128	0.994896
RBP4	finngen_R11_M13_RHEUMA	Rheumatoid arthritis || id:finngen_R11_M13_RHEUMA	RBP4++RBP_NA_RBP	Wald ratio	1	-0.0202724	0.15295	0.894555	-0.320054	0.279509	0.979932	0.72611	1.32248	0.959083
SMOC2	finngen_R11_M13_RHEUMA	Rheumatoid arthritis || id:finngen_R11_M13_RHEUMA	SMOC2++SMOC2_NA_SMOC2	Inverse variance weighted	6	0.0309713	0.0476506	0.515713	-0.0624238	0.124366	1.03146	0.939485	1.13243	0.990373
SMOC2	finngen_R11_M13_RHEUMA	Rheumatoid arthritis || id:finngen_R11_M13_RHEUMA	SMOC2++SMOC2_NA_SMOC2	MR Egger	6	0.109094	0.119044	0.411302	-0.124233	0.34242	1.11527	0.883174	1.40835	0.999671
SMOC2	finngen_R11_M13_RHEUMA	Rheumatoid arthritis || id:finngen_R11_M13_RHEUMA	SMOC2++SMOC2_NA_SMOC2	Weighted median	6	0.0278488	0.0400107	0.486409	-0.0505723	0.10627	1.02824	0.950685	1.11212	0.907742
SMOC2	finngen_R11_M13_RHEUMA	Rheumatoid arthritis || id:finngen_R11_M13_RHEUMA	SMOC2++SMOC2_NA_SMOC2	Weighted mode	6	0.0239401	0.0433603	0.604635	-0.061046	0.108926	1.02423	0.94078	1.11508	0.980099
SMOC2	finngen_R11_M13_RHEUMA	Rheumatoid arthritis || id:finngen_R11_M13_RHEUMA	SMOC2++SMOC2_NA_SMOC2	Maximum likelihood	6	0.0311502	0.037443	0.405445	-0.0422382	0.104539	1.03164	0.958641	1.1102	0.890655
SMOC2	finngen_R11_M13_RHEUMA	Rheumatoid arthritis || id:finngen_R11_M13_RHEUMA	SMOC2++SMOC2_NA_SMOC2	Simple mode	6	0.160819	0.111234	0.20787	-0.0571991	0.378837	1.17447	0.944406	1.46059	0.994896
SORCS1	finngen_R11_M13_RHEUMA	Rheumatoid arthritis || id:finngen_R11_M13_RHEUMA	SORCS1++SORC1_NA_SORC1	Wald ratio	1	0.128864	0.196349	0.511629	-0.25598	0.513708	1.13754	0.774158	1.67148	0.853226
TAGLN	finngen_R11_M13_RHEUMA	Rheumatoid arthritis || id:finngen_R11_M13_RHEUMA	TAGLN++TAGL_NA_TAGL	Inverse variance weighted	2	-0.00563962	0.24867	0.981906	-0.493033	0.481753	0.994376	0.610771	1.61891	0.998932
TAGLN	finngen_R11_M13_RHEUMA	Rheumatoid arthritis || id:finngen_R11_M13_RHEUMA	TAGLN++TAGL_NA_TAGL	Maximum likelihood	2	-0.00585929	0.114901	0.95933	-0.231066	0.219347	0.994158	0.793687	1.24526	0.989364
TMEFF1	finngen_R11_M13_RHEUMA	Rheumatoid arthritis || id:finngen_R11_M13_RHEUMA	TMEFF1++TEFF1_NA_TEFF1	Wald ratio	1	-0.208171	0.291509	0.475156	-0.779528	0.363186	0.812068	0.458623	1.4379	0.853181
BTD	finngen_R11_M13_RHEUMA	Rheumatoid arthritis || id:finngen_R11_M13_RHEUMA	BTD++Biotinidase_NA_Biotinidase	Inverse variance weighted	8	0.0191961	0.0301815	0.524762	-0.0399596	0.0783517	1.01938	0.960828	1.0815	0.990373
BTD	finngen_R11_M13_RHEUMA	Rheumatoid arthritis || id:finngen_R11_M13_RHEUMA	BTD++Biotinidase_NA_Biotinidase	MR Egger	8	0.00450587	0.0462751	0.925603	-0.0861932	0.095205	1.00452	0.917417	1.09988	0.999671
BTD	finngen_R11_M13_RHEUMA	Rheumatoid arthritis || id:finngen_R11_M13_RHEUMA	BTD++Biotinidase_NA_Biotinidase	Weighted median	8	0.00701759	0.0285079	0.805556	-0.048858	0.0628932	1.00704	0.952316	1.06491	0.982685
BTD	finngen_R11_M13_RHEUMA	Rheumatoid arthritis || id:finngen_R11_M13_RHEUMA	BTD++Biotinidase_NA_Biotinidase	Weighted mode	8	0.00377118	0.0257261	0.887588	-0.0466519	0.0541943	1.00378	0.95442	1.05569	0.984041
BTD	finngen_R11_M13_RHEUMA	Rheumatoid arthritis || id:finngen_R11_M13_RHEUMA	BTD++Biotinidase_NA_Biotinidase	Maximum likelihood	8	0.0192816	0.0258205	0.45521	-0.0313265	0.0698898	1.01947	0.969159	1.07239	0.895805
BTD	finngen_R11_M13_RHEUMA	Rheumatoid arthritis || id:finngen_R11_M13_RHEUMA	BTD++Biotinidase_NA_Biotinidase	Simple mode	8	0.0583073	0.0892836	0.534573	-0.116689	0.233303	1.06004	0.889862	1.26276	0.994896
COL10A1	finngen_R11_M13_RHEUMA	Rheumatoid arthritis || id:finngen_R11_M13_RHEUMA	COL10A1++COAA1_NA_COAA1	Inverse variance weighted	3	-0.104766	0.0792978	0.186446	-0.260189	0.0506582	0.900536	0.770906	1.05196	0.927309
COL10A1	finngen_R11_M13_RHEUMA	Rheumatoid arthritis || id:finngen_R11_M13_RHEUMA	COL10A1++COAA1_NA_COAA1	MR Egger	3	-0.00588531	0.183826	0.979625	-0.366184	0.354413	0.994132	0.693375	1.42534	0.999671
COL10A1	finngen_R11_M13_RHEUMA	Rheumatoid arthritis || id:finngen_R11_M13_RHEUMA	COL10A1++COAA1_NA_COAA1	Weighted median	3	-0.0896373	0.0558931	0.108774	-0.199188	0.0199132	0.914263	0.819396	1.02011	0.71668
COL10A1	finngen_R11_M13_RHEUMA	Rheumatoid arthritis || id:finngen_R11_M13_RHEUMA	COL10A1++COAA1_NA_COAA1	Weighted mode	3	-0.0775959	0.0603324	0.327187	-0.195847	0.0406556	0.925338	0.822138	1.04149	0.976532
COL10A1	finngen_R11_M13_RHEUMA	Rheumatoid arthritis || id:finngen_R11_M13_RHEUMA	COL10A1++COAA1_NA_COAA1	Maximum likelihood	3	-0.105081	0.055501	0.0583163	-0.213863	0.00370123	0.900252	0.807459	1.00371	0.516226
COL10A1	finngen_R11_M13_RHEUMA	Rheumatoid arthritis || id:finngen_R11_M13_RHEUMA	COL10A1++COAA1_NA_COAA1	Simple mode	3	-0.184246	0.154481	0.355308	-0.48703	0.118537	0.831731	0.614449	1.12585	0.994896
GPT	finngen_R11_M13_RHEUMA	Rheumatoid arthritis || id:finngen_R11_M13_RHEUMA	GPT++ALT_NA_ALT	Wald ratio	1	0.555545	0.245076	0.0234007	0.0751962	1.03589	1.74289	1.0781	2.81762	0.27867
FLT4	finngen_R11_M13_RHEUMA	Rheumatoid arthritis || id:finngen_R11_M13_RHEUMA	FLT4++VEGF_sR3	Inverse variance weighted	3	0.0638648	0.08588	0.457087	-0.10446	0.23219	1.06595	0.900811	1.26136	0.990373
FLT4	finngen_R11_M13_RHEUMA	Rheumatoid arthritis || id:finngen_R11_M13_RHEUMA	FLT4++VEGF_sR3	MR Egger	3	0.111647	0.16651	0.623974	-0.214713	0.438007	1.11812	0.806773	1.54962	0.999671
FLT4	finngen_R11_M13_RHEUMA	Rheumatoid arthritis || id:finngen_R11_M13_RHEUMA	FLT4++VEGF_sR3	Weighted median	3	0.0706832	0.0903636	0.434092	-0.10643	0.247796	1.07324	0.899038	1.2812	0.899893
FLT4	finngen_R11_M13_RHEUMA	Rheumatoid arthritis || id:finngen_R11_M13_RHEUMA	FLT4++VEGF_sR3	Weighted mode	3	0.0789402	0.0985288	0.50708	-0.114176	0.272057	1.08214	0.892101	1.31266	0.976532
FLT4	finngen_R11_M13_RHEUMA	Rheumatoid arthritis || id:finngen_R11_M13_RHEUMA	FLT4++VEGF_sR3	Maximum likelihood	3	0.0639075	0.0859935	0.457381	-0.10464	0.232455	1.06599	0.900649	1.26169	0.895805
FLT4	finngen_R11_M13_RHEUMA	Rheumatoid arthritis || id:finngen_R11_M13_RHEUMA	FLT4++VEGF_sR3	Simple mode	3	0.0527102	0.121912	0.707633	-0.186238	0.291658	1.05412	0.830076	1.33865	0.994896
OLR1	finngen_R11_M13_RHEUMA	Rheumatoid arthritis || id:finngen_R11_M13_RHEUMA	OLR1++OLR1_NA_OLR1	Wald ratio	1	-0.201425	0.234919	0.391212	-0.661866	0.259017	0.817565	0.515888	1.29566	0.789737
WIF1	finngen_R11_M13_RHEUMA	Rheumatoid arthritis || id:finngen_R11_M13_RHEUMA	WIF1++WIF_1	Wald ratio	1	-0.205327	0.214289	0.337974	-0.625334	0.21468	0.814381	0.535083	1.23947	0.772525
GRAP2	finngen_R11_M13_RHEUMA	Rheumatoid arthritis || id:finngen_R11_M13_RHEUMA	GRAP2++GRB2_related_adapter_protein_2	Wald ratio	1	-0.640208	0.308973	0.0382608	-1.2458	-0.0346203	0.527183	0.287712	0.965972	0.381769
TEC	finngen_R11_M13_RHEUMA	Rheumatoid arthritis || id:finngen_R11_M13_RHEUMA	TEC++TEC_NA_TEC	Wald ratio	1	-0.0619017	0.113582	0.585755	-0.284521	0.160718	0.939975	0.752374	1.17435	0.885657
EPHA4	finngen_R11_M13_RHEUMA	Rheumatoid arthritis || id:finngen_R11_M13_RHEUMA	EPHA4++EPHA4_NA_EPHA4	Inverse variance weighted	2	-0.161972	0.0884506	0.0670679	-0.335336	0.0113908	0.850465	0.715098	1.01146	0.714727
EPHA4	finngen_R11_M13_RHEUMA	Rheumatoid arthritis || id:finngen_R11_M13_RHEUMA	EPHA4++EPHA4_NA_EPHA4	Maximum likelihood	2	-0.162295	0.0890503	0.0683776	-0.336834	0.0122435	0.85019	0.714027	1.01232	0.533461
LGR5	finngen_R11_M13_RHEUMA	Rheumatoid arthritis || id:finngen_R11_M13_RHEUMA	LGR5++LGR5_NA_LGR5	Wald ratio	1	0.392714	0.239525	0.101098	-0.0767552	0.862183	1.48099	0.926117	2.36832	0.541774
BPIFA2	finngen_R11_M13_RHEUMA	Rheumatoid arthritis || id:finngen_R11_M13_RHEUMA	BPIFA2++SPLC2_NA_SPLC2	Wald ratio	1	0.278375	0.15971	0.0813324	-0.0346559	0.591406	1.32098	0.965938	1.80653	0.541774
LGR4	finngen_R11_M13_RHEUMA	Rheumatoid arthritis || id:finngen_R11_M13_RHEUMA	LGR4++LGR4_NA_LGR4	Wald ratio	1	-0.196062	0.225721	0.385066	-0.638475	0.246352	0.821962	0.528097	1.27935	0.788535
UNC5D	finngen_R11_M13_RHEUMA	Rheumatoid arthritis || id:finngen_R11_M13_RHEUMA	UNC5D++UNC5H4_NA_UNC5H4	Inverse variance weighted	2	-0.21911	0.122	0.0724977	-0.45823	0.0200104	0.803234	0.632402	1.02021	0.718561
UNC5D	finngen_R11_M13_RHEUMA	Rheumatoid arthritis || id:finngen_R11_M13_RHEUMA	UNC5D++UNC5H4_NA_UNC5H4	Maximum likelihood	2	-0.218981	0.12308	0.0752103	-0.460218	0.0222554	0.803337	0.631146	1.0225	0.546984
TLR1	finngen_R11_M13_RHEUMA	Rheumatoid arthritis || id:finngen_R11_M13_RHEUMA	TLR1++TLR1_NA_TLR1	Wald ratio	1	0.188764	0.125125	0.1314	-0.0564809	0.434009	1.20776	0.945085	1.54343	0.59024
A1BG	finngen_R11_M13_RHEUMA	Rheumatoid arthritis || id:finngen_R11_M13_RHEUMA	A1BG++Alpha_1B_glycoprotein	Inverse variance weighted	4	-0.0352864	0.0444891	0.427693	-0.122485	0.0519123	0.965329	0.884719	1.05328	0.990373
A1BG	finngen_R11_M13_RHEUMA	Rheumatoid arthritis || id:finngen_R11_M13_RHEUMA	A1BG++Alpha_1B_glycoprotein	MR Egger	4	-0.0520711	0.0580321	0.464261	-0.165814	0.0616718	0.949261	0.847204	1.06361	0.999671
A1BG	finngen_R11_M13_RHEUMA	Rheumatoid arthritis || id:finngen_R11_M13_RHEUMA	A1BG++Alpha_1B_glycoprotein	Weighted median	4	-0.0392702	0.047724	0.410587	-0.132809	0.0542688	0.961491	0.875632	1.05577	0.88643
A1BG	finngen_R11_M13_RHEUMA	Rheumatoid arthritis || id:finngen_R11_M13_RHEUMA	A1BG++Alpha_1B_glycoprotein	Weighted mode	4	-0.036647	0.0558559	0.558591	-0.146125	0.0728306	0.964016	0.86405	1.07555	0.976532
A1BG	finngen_R11_M13_RHEUMA	Rheumatoid arthritis || id:finngen_R11_M13_RHEUMA	A1BG++Alpha_1B_glycoprotein	Maximum likelihood	4	-0.0352939	0.0444987	0.427694	-0.122511	0.0519236	0.965322	0.884696	1.0533	0.891932
A1BG	finngen_R11_M13_RHEUMA	Rheumatoid arthritis || id:finngen_R11_M13_RHEUMA	A1BG++Alpha_1B_glycoprotein	Simple mode	4	-0.0540453	0.060259	0.435874	-0.172153	0.0640624	0.947389	0.84185	1.06616	0.994896
NUDT2	finngen_R11_M13_RHEUMA	Rheumatoid arthritis || id:finngen_R11_M13_RHEUMA	NUDT2++AP4A_NA_AP4A	Inverse variance weighted	3	-0.0889448	0.0453677	0.0499335	-0.177865	-2.41821e-05	0.914896	0.837055	0.999976	0.686968
NUDT2	finngen_R11_M13_RHEUMA	Rheumatoid arthritis || id:finngen_R11_M13_RHEUMA	NUDT2++AP4A_NA_AP4A	MR Egger	3	-0.280666	0.236035	0.445147	-0.743294	0.181962	0.755281	0.475545	1.19957	0.999671
NUDT2	finngen_R11_M13_RHEUMA	Rheumatoid arthritis || id:finngen_R11_M13_RHEUMA	NUDT2++AP4A_NA_AP4A	Weighted median	3	-0.0980007	0.045184	0.0300881	-0.186561	-0.0094402	0.906648	0.829808	0.990604	0.467218
NUDT2	finngen_R11_M13_RHEUMA	Rheumatoid arthritis || id:finngen_R11_M13_RHEUMA	NUDT2++AP4A_NA_AP4A	Weighted mode	3	-0.0980692	0.0460393	0.166893	-0.188306	-0.00783211	0.906586	0.828361	0.992198	0.976532
NUDT2	finngen_R11_M13_RHEUMA	Rheumatoid arthritis || id:finngen_R11_M13_RHEUMA	NUDT2++AP4A_NA_AP4A	Maximum likelihood	3	-0.0890239	0.0451978	0.0488784	-0.177612	-0.000436184	0.914824	0.837268	0.999564	0.506887
NUDT2	finngen_R11_M13_RHEUMA	Rheumatoid arthritis || id:finngen_R11_M13_RHEUMA	NUDT2++AP4A_NA_AP4A	Simple mode	3	-0.0971312	0.0760444	0.329731	-0.246178	0.0519159	0.907437	0.781783	1.05329	0.994896
GLRX3	finngen_R11_M13_RHEUMA	Rheumatoid arthritis || id:finngen_R11_M13_RHEUMA	GLRX3++GLRX3_NA_GLRX3	Wald ratio	1	-0.261244	0.161144	0.104979	-0.577086	0.0545985	0.770093	0.561532	1.05612	0.542273
C1QTNF9	finngen_R11_M13_RHEUMA	Rheumatoid arthritis || id:finngen_R11_M13_RHEUMA	C1QTNF9++C1T9A_NA_C1T9A	Wald ratio	1	0.0033912	0.0665737	0.959374	-0.127093	0.133876	1.0034	0.880652	1.14325	0.984055
AKR1B1	finngen_R11_M13_RHEUMA	Rheumatoid arthritis || id:finngen_R11_M13_RHEUMA	AKR1B1++Aldose_reductase	Inverse variance weighted	2	-0.00126247	0.128211	0.992143	-0.252556	0.250031	0.998738	0.776813	1.28406	0.999638
AKR1B1	finngen_R11_M13_RHEUMA	Rheumatoid arthritis || id:finngen_R11_M13_RHEUMA	AKR1B1++Aldose_reductase	Maximum likelihood	2	-0.00126018	0.128245	0.99216	-0.25262	0.2501	0.998741	0.776763	1.28415	0.999298
GSN	finngen_R11_M13_RHEUMA	Rheumatoid arthritis || id:finngen_R11_M13_RHEUMA	GSN++Gelsolin_NA_Gelsolin	Inverse variance weighted (multiplicative random effects)	4	0.0723059	0.101581	0.476584	-0.126792	0.271404	1.07498	0.880917	1.3118	0.990373
GSN	finngen_R11_M13_RHEUMA	Rheumatoid arthritis || id:finngen_R11_M13_RHEUMA	GSN++Gelsolin_NA_Gelsolin	MR Egger	4	0.197399	0.110136	0.214952	-0.0184674	0.413266	1.21823	0.981702	1.51175	0.999671
GSN	finngen_R11_M13_RHEUMA	Rheumatoid arthritis || id:finngen_R11_M13_RHEUMA	GSN++Gelsolin_NA_Gelsolin	Weighted median	4	0.105159	0.053354	0.0487266	0.000585629	0.209733	1.11089	1.00059	1.23335	0.542666
GSN	finngen_R11_M13_RHEUMA	Rheumatoid arthritis || id:finngen_R11_M13_RHEUMA	GSN++Gelsolin_NA_Gelsolin	Weighted mode	4	0.110679	0.0550058	0.1377	0.00286721	0.21849	1.11704	1.00287	1.2442	0.976532
GSN	finngen_R11_M13_RHEUMA	Rheumatoid arthritis || id:finngen_R11_M13_RHEUMA	GSN++Gelsolin_NA_Gelsolin	Maximum likelihood	4	0.0732416	0.0491171	0.135919	-0.023028	0.169511	1.07599	0.977235	1.18473	0.663866
GSN	finngen_R11_M13_RHEUMA	Rheumatoid arthritis || id:finngen_R11_M13_RHEUMA	GSN++Gelsolin_NA_Gelsolin	Simple mode	4	0.174083	0.0942683	0.161958	-0.0106825	0.358849	1.19015	0.989374	1.43168	0.994896
LRP10	finngen_R11_M13_RHEUMA	Rheumatoid arthritis || id:finngen_R11_M13_RHEUMA	LRP10++LRP10_NA_LRP10	Inverse variance weighted	2	0.200399	0.188045	0.286561	-0.168169	0.568968	1.22189	0.845211	1.76644	0.986776
LRP10	finngen_R11_M13_RHEUMA	Rheumatoid arthritis || id:finngen_R11_M13_RHEUMA	LRP10++LRP10_NA_LRP10	Maximum likelihood	2	0.203233	0.171808	0.236847	-0.133512	0.539977	1.22536	0.875017	1.71597	0.7864
CDH17	finngen_R11_M13_RHEUMA	Rheumatoid arthritis || id:finngen_R11_M13_RHEUMA	CDH17++CAD17_NA_CAD17	Inverse variance weighted	5	0.0438567	0.0492478	0.373181	-0.0526689	0.140382	1.04483	0.948694	1.15071	0.990373
CDH17	finngen_R11_M13_RHEUMA	Rheumatoid arthritis || id:finngen_R11_M13_RHEUMA	CDH17++CAD17_NA_CAD17	MR Egger	5	0.0120803	0.112945	0.921574	-0.209291	0.233452	1.01215	0.811159	1.26295	0.999671
CDH17	finngen_R11_M13_RHEUMA	Rheumatoid arthritis || id:finngen_R11_M13_RHEUMA	CDH17++CAD17_NA_CAD17	Weighted median	5	0.043155	0.0400913	0.281739	-0.0354238	0.121734	1.0441	0.965196	1.12945	0.88365
CDH17	finngen_R11_M13_RHEUMA	Rheumatoid arthritis || id:finngen_R11_M13_RHEUMA	CDH17++CAD17_NA_CAD17	Weighted mode	5	0.0480382	0.04375	0.333853	-0.0377118	0.133788	1.04921	0.96299	1.14315	0.976532
CDH17	finngen_R11_M13_RHEUMA	Rheumatoid arthritis || id:finngen_R11_M13_RHEUMA	CDH17++CAD17_NA_CAD17	Maximum likelihood	5	0.0439953	0.0396718	0.267438	-0.0337614	0.121752	1.04498	0.966802	1.12947	0.822274
CDH17	finngen_R11_M13_RHEUMA	Rheumatoid arthritis || id:finngen_R11_M13_RHEUMA	CDH17++CAD17_NA_CAD17	Simple mode	5	0.00865848	0.0706655	0.908391	-0.129846	0.147163	1.0087	0.878231	1.15854	0.994896
RSPO1	finngen_R11_M13_RHEUMA	Rheumatoid arthritis || id:finngen_R11_M13_RHEUMA	RSPO1++RSPO1_NA_RSPO1	Wald ratio	1	0.0441129	0.0853074	0.605083	-0.12309	0.211315	1.0451	0.884184	1.2353	0.885657
ENO3	finngen_R11_M13_RHEUMA	Rheumatoid arthritis || id:finngen_R11_M13_RHEUMA	ENO3++ENOB_NA_ENOB	Inverse variance weighted	3	0.0171656	0.0391498	0.661052	-0.0595679	0.0938992	1.01731	0.942172	1.09845	0.990373
ENO3	finngen_R11_M13_RHEUMA	Rheumatoid arthritis || id:finngen_R11_M13_RHEUMA	ENO3++ENOB_NA_ENOB	MR Egger	3	0.0880324	0.0668724	0.413572	-0.0430374	0.219102	1.09202	0.957876	1.24496	0.999671
ENO3	finngen_R11_M13_RHEUMA	Rheumatoid arthritis || id:finngen_R11_M13_RHEUMA	ENO3++ENOB_NA_ENOB	Weighted median	3	0.0258246	0.0387105	0.504694	-0.0500479	0.101697	1.02616	0.951184	1.10705	0.912537
ENO3	finngen_R11_M13_RHEUMA	Rheumatoid arthritis || id:finngen_R11_M13_RHEUMA	ENO3++ENOB_NA_ENOB	Weighted mode	3	0.0256248	0.0417802	0.60212	-0.0562643	0.107514	1.02596	0.945289	1.11351	0.980099
ENO3	finngen_R11_M13_RHEUMA	Rheumatoid arthritis || id:finngen_R11_M13_RHEUMA	ENO3++ENOB_NA_ENOB	Maximum likelihood	3	0.0171871	0.0391781	0.660886	-0.0596021	0.0939762	1.01734	0.942139	1.09853	0.93286
ENO3	finngen_R11_M13_RHEUMA	Rheumatoid arthritis || id:finngen_R11_M13_RHEUMA	ENO3++ENOB_NA_ENOB	Simple mode	3	0.0285918	0.10536	0.811549	-0.177914	0.235098	1.029	0.837015	1.26503	0.994896
NPPB	finngen_R11_M13_RHEUMA	Rheumatoid arthritis || id:finngen_R11_M13_RHEUMA	NPPB++BNP_NA_BNP	Wald ratio	1	-0.0988835	0.141163	0.483619	-0.375562	0.177795	0.905848	0.686903	1.19458	0.853181
COL6A2	finngen_R11_M13_RHEUMA	Rheumatoid arthritis || id:finngen_R11_M13_RHEUMA	COL6A2++CO6A2_NA_CO6A2	Inverse variance weighted	6	0.104992	0.0450911	0.0198881	0.0166139	0.193371	1.1107	1.01675	1.21333	0.473929
COL6A2	finngen_R11_M13_RHEUMA	Rheumatoid arthritis || id:finngen_R11_M13_RHEUMA	COL6A2++CO6A2_NA_CO6A2	MR Egger	6	0.104784	0.0848981	0.284673	-0.0616168	0.271184	1.11047	0.940243	1.31152	0.999671
COL6A2	finngen_R11_M13_RHEUMA	Rheumatoid arthritis || id:finngen_R11_M13_RHEUMA	COL6A2++CO6A2_NA_CO6A2	Weighted median	6	0.101902	0.0481478	0.0343065	0.00753276	0.196272	1.10728	1.00756	1.21686	0.49532
COL6A2	finngen_R11_M13_RHEUMA	Rheumatoid arthritis || id:finngen_R11_M13_RHEUMA	COL6A2++CO6A2_NA_CO6A2	Weighted mode	6	0.100178	0.0543948	0.124876	-0.00643546	0.206792	1.10537	0.993585	1.22973	0.976532
COL6A2	finngen_R11_M13_RHEUMA	Rheumatoid arthritis || id:finngen_R11_M13_RHEUMA	COL6A2++CO6A2_NA_CO6A2	Maximum likelihood	6	0.105095	0.0452133	0.020103	0.0164766	0.193713	1.11082	1.01661	1.21375	0.352864
COL6A2	finngen_R11_M13_RHEUMA	Rheumatoid arthritis || id:finngen_R11_M13_RHEUMA	COL6A2++CO6A2_NA_CO6A2	Simple mode	6	0.104012	0.0717817	0.207013	-0.0366803	0.244704	1.10961	0.963984	1.27724	0.994896
HDGF	finngen_R11_M13_RHEUMA	Rheumatoid arthritis || id:finngen_R11_M13_RHEUMA	HDGF++HDGF_NA_HDGF	Wald ratio	1	-0.332607	0.170327	0.050849	-0.666448	0.0012346	0.717052	0.513529	1.00124	0.42273
REG1B	finngen_R11_M13_RHEUMA	Rheumatoid arthritis || id:finngen_R11_M13_RHEUMA	REG1B++REG1B_NA_REG1B	Inverse variance weighted	8	-0.0901683	0.0444517	0.0425137	-0.177294	-0.00304302	0.913777	0.837534	0.996962	0.682376
REG1B	finngen_R11_M13_RHEUMA	Rheumatoid arthritis || id:finngen_R11_M13_RHEUMA	REG1B++REG1B_NA_REG1B	MR Egger	8	-0.0240338	0.110601	0.835175	-0.240812	0.192745	0.976253	0.785989	1.21257	0.999671
REG1B	finngen_R11_M13_RHEUMA	Rheumatoid arthritis || id:finngen_R11_M13_RHEUMA	REG1B++REG1B_NA_REG1B	Weighted median	8	-0.073615	0.0521806	0.158311	-0.175889	0.028659	0.929029	0.838711	1.02907	0.814013
REG1B	finngen_R11_M13_RHEUMA	Rheumatoid arthritis || id:finngen_R11_M13_RHEUMA	REG1B++REG1B_NA_REG1B	Weighted mode	8	-0.0674872	0.0470962	0.194978	-0.159796	0.0248213	0.93474	0.852318	1.02513	0.976532
REG1B	finngen_R11_M13_RHEUMA	Rheumatoid arthritis || id:finngen_R11_M13_RHEUMA	REG1B++REG1B_NA_REG1B	Maximum likelihood	8	-0.0904877	0.0446628	0.0427627	-0.178027	-0.00294867	0.913486	0.83692	0.997056	0.498898
REG1B	finngen_R11_M13_RHEUMA	Rheumatoid arthritis || id:finngen_R11_M13_RHEUMA	REG1B++REG1B_NA_REG1B	Simple mode	8	-0.114049	0.082298	0.20835	-0.275353	0.0472554	0.892215	0.759304	1.04839	0.994896
SCUBE3	finngen_R11_M13_RHEUMA	Rheumatoid arthritis || id:finngen_R11_M13_RHEUMA	SCUBE3++SCUB3_NA_SCUB3	Wald ratio	1	0.089289	0.0673936	0.185208	-0.0428024	0.22138	1.0934	0.958101	1.2478	0.679143
ENGASE	finngen_R11_M13_RHEUMA	Rheumatoid arthritis || id:finngen_R11_M13_RHEUMA	ENGASE++ENASE_NA_ENASE	Inverse variance weighted	6	-0.0232759	0.0261275	0.373005	-0.0744859	0.027934	0.976993	0.928221	1.02833	0.990373
ENGASE	finngen_R11_M13_RHEUMA	Rheumatoid arthritis || id:finngen_R11_M13_RHEUMA	ENGASE++ENASE_NA_ENASE	MR Egger	6	-0.0903213	0.0465619	0.124405	-0.181583	0.000940094	0.913638	0.833949	1.00094	0.999671
ENGASE	finngen_R11_M13_RHEUMA	Rheumatoid arthritis || id:finngen_R11_M13_RHEUMA	ENGASE++ENASE_NA_ENASE	Weighted median	6	-0.0315202	0.0278504	0.257732	-0.086107	0.0230666	0.968971	0.917496	1.02333	0.866995
ENGASE	finngen_R11_M13_RHEUMA	Rheumatoid arthritis || id:finngen_R11_M13_RHEUMA	ENGASE++ENASE_NA_ENASE	Weighted mode	6	-0.0295706	0.0251784	0.293103	-0.0789202	0.0197791	0.970862	0.924114	1.01998	0.976532
ENGASE	finngen_R11_M13_RHEUMA	Rheumatoid arthritis || id:finngen_R11_M13_RHEUMA	ENGASE++ENASE_NA_ENASE	Maximum likelihood	6	-0.0233307	0.0244353	0.339682	-0.0712238	0.0245625	0.976939	0.931253	1.02487	0.862216
ENGASE	finngen_R11_M13_RHEUMA	Rheumatoid arthritis || id:finngen_R11_M13_RHEUMA	ENGASE++ENASE_NA_ENASE	Simple mode	6	-0.0527188	0.041668	0.261553	-0.134388	0.0289504	0.948647	0.874251	1.02937	0.994896
DEFA5	finngen_R11_M13_RHEUMA	Rheumatoid arthritis || id:finngen_R11_M13_RHEUMA	DEFA5++HD_5	Wald ratio	1	-0.043501	0.126642	0.731226	-0.29172	0.204718	0.957432	0.746978	1.22718	0.935106
SIGLEC5	finngen_R11_M13_RHEUMA	Rheumatoid arthritis || id:finngen_R11_M13_RHEUMA	SIGLEC5++Siglec_5	Inverse variance weighted	10	-0.0174435	0.0169671	0.303915	-0.050699	0.0158121	0.982708	0.950565	1.01594	0.986776
SIGLEC5	finngen_R11_M13_RHEUMA	Rheumatoid arthritis || id:finngen_R11_M13_RHEUMA	SIGLEC5++Siglec_5	MR Egger	10	-0.014926	0.0454706	0.751145	-0.104048	0.0741964	0.985185	0.901182	1.07702	0.999671
SIGLEC5	finngen_R11_M13_RHEUMA	Rheumatoid arthritis || id:finngen_R11_M13_RHEUMA	SIGLEC5++Siglec_5	Weighted median	10	-0.0203193	0.0205882	0.323674	-0.0606723	0.0200337	0.979886	0.941132	1.02024	0.88643
SIGLEC5	finngen_R11_M13_RHEUMA	Rheumatoid arthritis || id:finngen_R11_M13_RHEUMA	SIGLEC5++Siglec_5	Weighted mode	10	-0.0149518	0.0198246	0.469998	-0.0538079	0.0239044	0.985159	0.947614	1.02419	0.976532
SIGLEC5	finngen_R11_M13_RHEUMA	Rheumatoid arthritis || id:finngen_R11_M13_RHEUMA	SIGLEC5++Siglec_5	Maximum likelihood	10	-0.0174786	0.0169829	0.303391	-0.050765	0.0158079	0.982673	0.950502	1.01593	0.834962
SIGLEC5	finngen_R11_M13_RHEUMA	Rheumatoid arthritis || id:finngen_R11_M13_RHEUMA	SIGLEC5++Siglec_5	Simple mode	10	-0.0199308	0.0296036	0.517698	-0.0779539	0.0380923	0.980266	0.925007	1.03883	0.994896
CALB2	finngen_R11_M13_RHEUMA	Rheumatoid arthritis || id:finngen_R11_M13_RHEUMA	CALB2++CALB2_NA_CALB2	Wald ratio	1	-0.401181	0.260628	0.123735	-0.912012	0.10965	0.669529	0.401715	1.11589	0.569588
NME4	finngen_R11_M13_RHEUMA	Rheumatoid arthritis || id:finngen_R11_M13_RHEUMA	NME4++NDKM_NA_NDKM	Inverse variance weighted	2	-0.0911233	0.204116	0.655287	-0.49119	0.308943	0.912905	0.611898	1.36199	0.990373
NME4	finngen_R11_M13_RHEUMA	Rheumatoid arthritis || id:finngen_R11_M13_RHEUMA	NME4++NDKM_NA_NDKM	Maximum likelihood	2	-0.0912435	0.20454	0.655531	-0.492142	0.309655	0.912795	0.611316	1.36295	0.93286
APOL3	finngen_R11_M13_RHEUMA	Rheumatoid arthritis || id:finngen_R11_M13_RHEUMA	APOL3++APOL3_NA_APOL3	Inverse variance weighted	7	0.000711148	0.0309674	0.981679	-0.059985	0.0614073	1.00071	0.941779	1.06333	0.998932
APOL3	finngen_R11_M13_RHEUMA	Rheumatoid arthritis || id:finngen_R11_M13_RHEUMA	APOL3++APOL3_NA_APOL3	MR Egger	7	0.0460012	0.0520177	0.417006	-0.0559536	0.147956	1.04708	0.945583	1.15946	0.999671
APOL3	finngen_R11_M13_RHEUMA	Rheumatoid arthritis || id:finngen_R11_M13_RHEUMA	APOL3++APOL3_NA_APOL3	Weighted median	7	0.00176957	0.0359102	0.960698	-0.0686145	0.0721536	1.00177	0.933687	1.07482	0.990069
APOL3	finngen_R11_M13_RHEUMA	Rheumatoid arthritis || id:finngen_R11_M13_RHEUMA	APOL3++APOL3_NA_APOL3	Weighted mode	7	0.00460758	0.0396432	0.911266	-0.073093	0.0823082	1.00462	0.929514	1.08579	0.984041
APOL3	finngen_R11_M13_RHEUMA	Rheumatoid arthritis || id:finngen_R11_M13_RHEUMA	APOL3++APOL3_NA_APOL3	Maximum likelihood	7	0.000711196	0.0309976	0.981695	-0.060044	0.0614664	1.00071	0.941723	1.06339	0.997118
APOL3	finngen_R11_M13_RHEUMA	Rheumatoid arthritis || id:finngen_R11_M13_RHEUMA	APOL3++APOL3_NA_APOL3	Simple mode	7	0.0212492	0.0466795	0.664962	-0.0702426	0.112741	1.02148	0.932168	1.11934	0.994896
ATXN3	finngen_R11_M13_RHEUMA	Rheumatoid arthritis || id:finngen_R11_M13_RHEUMA	ATXN3++ATX3_NA_ATX3	Inverse variance weighted	4	0.0443539	0.0490458	0.365817	-0.0517759	0.140484	1.04535	0.949542	1.15083	0.990373
ATXN3	finngen_R11_M13_RHEUMA	Rheumatoid arthritis || id:finngen_R11_M13_RHEUMA	ATXN3++ATX3_NA_ATX3	MR Egger	4	0.109585	0.106069	0.410103	-0.098311	0.317481	1.11581	0.906367	1.37366	0.999671
ATXN3	finngen_R11_M13_RHEUMA	Rheumatoid arthritis || id:finngen_R11_M13_RHEUMA	ATXN3++ATX3_NA_ATX3	Weighted median	4	0.0538504	0.0504454	0.285746	-0.0450225	0.152723	1.05533	0.955976	1.165	0.88365
ATXN3	finngen_R11_M13_RHEUMA	Rheumatoid arthritis || id:finngen_R11_M13_RHEUMA	ATXN3++ATX3_NA_ATX3	Weighted mode	4	0.0544977	0.0515734	0.368214	-0.0465861	0.155582	1.05601	0.954482	1.16834	0.976532
ATXN3	finngen_R11_M13_RHEUMA	Rheumatoid arthritis || id:finngen_R11_M13_RHEUMA	ATXN3++ATX3_NA_ATX3	Maximum likelihood	4	0.0444137	0.0491053	0.365752	-0.0518326	0.14066	1.04541	0.949488	1.15103	0.881959
ATXN3	finngen_R11_M13_RHEUMA	Rheumatoid arthritis || id:finngen_R11_M13_RHEUMA	ATXN3++ATX3_NA_ATX3	Simple mode	4	0.0442478	0.0982837	0.683107	-0.148388	0.236884	1.04524	0.862096	1.26729	0.994896
COL6A1	finngen_R11_M13_RHEUMA	Rheumatoid arthritis || id:finngen_R11_M13_RHEUMA	COL6A1++Collagen_a1_VI	Inverse variance weighted	14	-0.0292329	0.0207817	0.159527	-0.069965	0.0114992	0.97119	0.932426	1.01157	0.881192
COL6A1	finngen_R11_M13_RHEUMA	Rheumatoid arthritis || id:finngen_R11_M13_RHEUMA	COL6A1++Collagen_a1_VI	MR Egger	14	-0.0289998	0.0630079	0.653561	-0.152495	0.0944957	0.971417	0.858563	1.0991	0.999671
COL6A1	finngen_R11_M13_RHEUMA	Rheumatoid arthritis || id:finngen_R11_M13_RHEUMA	COL6A1++Collagen_a1_VI	Weighted median	14	-0.0383022	0.0272818	0.160335	-0.0917744	0.0151701	0.962422	0.912311	1.01529	0.814013
COL6A1	finngen_R11_M13_RHEUMA	Rheumatoid arthritis || id:finngen_R11_M13_RHEUMA	COL6A1++Collagen_a1_VI	Weighted mode	14	-0.0361483	0.0284702	0.226454	-0.0919499	0.0196533	0.964497	0.912151	1.01985	0.976532
COL6A1	finngen_R11_M13_RHEUMA	Rheumatoid arthritis || id:finngen_R11_M13_RHEUMA	COL6A1++Collagen_a1_VI	Maximum likelihood	14	-0.0290591	0.0208281	0.162959	-0.0698821	0.0117639	0.971359	0.932504	1.01183	0.699288
COL6A1	finngen_R11_M13_RHEUMA	Rheumatoid arthritis || id:finngen_R11_M13_RHEUMA	COL6A1++Collagen_a1_VI	Simple mode	14	-0.0178097	0.0344529	0.613888	-0.0853373	0.049718	0.982348	0.918202	1.05097	0.994896
CFHR3	finngen_R11_M13_RHEUMA	Rheumatoid arthritis || id:finngen_R11_M13_RHEUMA	CFHR3++FHR3_NA_FHR3	Wald ratio	1	-0.0638005	0.114204	0.576397	-0.28764	0.160039	0.938192	0.750032	1.17356	0.885657
SCO2	finngen_R11_M13_RHEUMA	Rheumatoid arthritis || id:finngen_R11_M13_RHEUMA	SCO2++SCO2_NA_SCO2	Wald ratio	1	0.101749	0.129801	0.433108	-0.152661	0.356159	1.10711	0.858421	1.42783	0.830108
MAPRE2	finngen_R11_M13_RHEUMA	Rheumatoid arthritis || id:finngen_R11_M13_RHEUMA	MAPRE2++MARE2_NA_MARE2	Wald ratio	1	0.0189867	0.0842085	0.821612	-0.146062	0.184035	1.01917	0.864104	1.20206	0.944479
PHPT1	finngen_R11_M13_RHEUMA	Rheumatoid arthritis || id:finngen_R11_M13_RHEUMA	PHPT1++PHP14_NA_PHP14	Inverse variance weighted	2	0.0393934	0.0610235	0.518574	-0.0802127	0.158999	1.04018	0.92292	1.17234	0.990373
PHPT1	finngen_R11_M13_RHEUMA	Rheumatoid arthritis || id:finngen_R11_M13_RHEUMA	PHPT1++PHP14_NA_PHP14	Maximum likelihood	2	0.0393967	0.0610551	0.518755	-0.0802712	0.159065	1.04018	0.922866	1.17241	0.912625
ADAMTSL1	finngen_R11_M13_RHEUMA	Rheumatoid arthritis || id:finngen_R11_M13_RHEUMA	ADAMTSL1++ATL1_NA_ATL1	Inverse variance weighted	7	-0.00667175	0.0410878	0.871008	-0.0872038	0.0738603	0.99335	0.91649	1.07666	0.992378
ADAMTSL1	finngen_R11_M13_RHEUMA	Rheumatoid arthritis || id:finngen_R11_M13_RHEUMA	ADAMTSL1++ATL1_NA_ATL1	MR Egger	7	-0.00804044	0.0668649	0.908968	-0.139096	0.123015	0.991992	0.870145	1.1309	0.999671
ADAMTSL1	finngen_R11_M13_RHEUMA	Rheumatoid arthritis || id:finngen_R11_M13_RHEUMA	ADAMTSL1++ATL1_NA_ATL1	Weighted median	7	-0.0106222	0.0435723	0.807399	-0.0960239	0.0747796	0.989434	0.908442	1.07765	0.982685
ADAMTSL1	finngen_R11_M13_RHEUMA	Rheumatoid arthritis || id:finngen_R11_M13_RHEUMA	ADAMTSL1++ATL1_NA_ATL1	Weighted mode	7	-0.0121176	0.045394	0.798451	-0.10109	0.0768546	0.987956	0.903852	1.07989	0.984041
ADAMTSL1	finngen_R11_M13_RHEUMA	Rheumatoid arthritis || id:finngen_R11_M13_RHEUMA	ADAMTSL1++ATL1_NA_ATL1	Maximum likelihood	7	-0.00664823	0.0411203	0.87156	-0.087244	0.0739475	0.993374	0.916453	1.07675	0.975865
ADAMTSL1	finngen_R11_M13_RHEUMA	Rheumatoid arthritis || id:finngen_R11_M13_RHEUMA	ADAMTSL1++ATL1_NA_ATL1	Simple mode	7	-0.0355297	0.0780123	0.664811	-0.188434	0.117374	0.965094	0.828255	1.12454	0.994896
CD14	finngen_R11_M13_RHEUMA	Rheumatoid arthritis || id:finngen_R11_M13_RHEUMA	CD14++sCD14_NA_sCD14	Inverse variance weighted	4	0.0945886	0.0502278	0.0596743	-0.00385789	0.193035	1.09921	0.99615	1.21293	0.705108
CD14	finngen_R11_M13_RHEUMA	Rheumatoid arthritis || id:finngen_R11_M13_RHEUMA	CD14++sCD14_NA_sCD14	MR Egger	4	0.121952	0.250598	0.674617	-0.36922	0.613123	1.1297	0.691273	1.84619	0.999671
CD14	finngen_R11_M13_RHEUMA	Rheumatoid arthritis || id:finngen_R11_M13_RHEUMA	CD14++sCD14_NA_sCD14	Weighted median	4	0.102745	0.0534959	0.0547811	-0.00210728	0.207597	1.10821	0.997895	1.23072	0.570694
CD14	finngen_R11_M13_RHEUMA	Rheumatoid arthritis || id:finngen_R11_M13_RHEUMA	CD14++sCD14_NA_sCD14	Weighted mode	4	0.108224	0.0547944	0.142738	0.000826708	0.215621	1.1143	1.00083	1.24063	0.976532
CD14	finngen_R11_M13_RHEUMA	Rheumatoid arthritis || id:finngen_R11_M13_RHEUMA	CD14++sCD14_NA_sCD14	Maximum likelihood	4	0.094714	0.0498026	0.0571989	-0.0028991	0.192327	1.09934	0.997105	1.21207	0.516226
CD14	finngen_R11_M13_RHEUMA	Rheumatoid arthritis || id:finngen_R11_M13_RHEUMA	CD14++sCD14_NA_sCD14	Simple mode	4	0.115412	0.0724481	0.209401	-0.0265857	0.257411	1.12234	0.973765	1.29358	0.994896
SEMA4A	finngen_R11_M13_RHEUMA	Rheumatoid arthritis || id:finngen_R11_M13_RHEUMA	SEMA4A++SEM4A_NA_SEM4A	Wald ratio	1	-0.0623947	0.0746731	0.403396	-0.208754	0.0839645	0.939512	0.811595	1.08759	0.802469
SLITRK6	finngen_R11_M13_RHEUMA	Rheumatoid arthritis || id:finngen_R11_M13_RHEUMA	SLITRK6++SLIK6_NA_SLIK6	Inverse variance weighted	3	0.0557753	0.0880878	0.526617	-0.116877	0.228427	1.05736	0.889695	1.25662	0.990373
SLITRK6	finngen_R11_M13_RHEUMA	Rheumatoid arthritis || id:finngen_R11_M13_RHEUMA	SLITRK6++SLIK6_NA_SLIK6	MR Egger	3	0.0306995	0.146666	0.868642	-0.256765	0.318164	1.03118	0.77355	1.3746	0.999671
SLITRK6	finngen_R11_M13_RHEUMA	Rheumatoid arthritis || id:finngen_R11_M13_RHEUMA	SLITRK6++SLIK6_NA_SLIK6	Weighted median	3	0.0629381	0.100434	0.530881	-0.133913	0.259789	1.06496	0.874666	1.29666	0.921762
SLITRK6	finngen_R11_M13_RHEUMA	Rheumatoid arthritis || id:finngen_R11_M13_RHEUMA	SLITRK6++SLIK6_NA_SLIK6	Weighted mode	3	0.0827525	0.119544	0.56036	-0.151554	0.317059	1.08627	0.859371	1.37308	0.976532
SLITRK6	finngen_R11_M13_RHEUMA	Rheumatoid arthritis || id:finngen_R11_M13_RHEUMA	SLITRK6++SLIK6_NA_SLIK6	Maximum likelihood	3	0.0559486	0.0884258	0.526918	-0.117366	0.229263	1.05754	0.88926	1.25767	0.916379
SLITRK6	finngen_R11_M13_RHEUMA	Rheumatoid arthritis || id:finngen_R11_M13_RHEUMA	SLITRK6++SLIK6_NA_SLIK6	Simple mode	3	0.0943103	0.123913	0.526092	-0.148559	0.33718	1.0989	0.861949	1.40099	0.994896
TLR3	finngen_R11_M13_RHEUMA	Rheumatoid arthritis || id:finngen_R11_M13_RHEUMA	TLR3++TLR3_NA_TLR3	Inverse variance weighted	8	-0.0212367	0.0272317	0.435479	-0.0746108	0.0321375	0.978987	0.928105	1.03266	0.990373
TLR3	finngen_R11_M13_RHEUMA	Rheumatoid arthritis || id:finngen_R11_M13_RHEUMA	TLR3++TLR3_NA_TLR3	MR Egger	8	-0.0335577	0.0498313	0.525753	-0.131227	0.0641118	0.966999	0.877019	1.06621	0.999671
TLR3	finngen_R11_M13_RHEUMA	Rheumatoid arthritis || id:finngen_R11_M13_RHEUMA	TLR3++TLR3_NA_TLR3	Weighted median	8	-0.0212917	0.0308151	0.489596	-0.0816894	0.0391059	0.978933	0.921558	1.03988	0.908084
TLR3	finngen_R11_M13_RHEUMA	Rheumatoid arthritis || id:finngen_R11_M13_RHEUMA	TLR3++TLR3_NA_TLR3	Weighted mode	8	-0.0208186	0.0313614	0.528051	-0.0822869	0.0406498	0.979397	0.921008	1.04149	0.976532
TLR3	finngen_R11_M13_RHEUMA	Rheumatoid arthritis || id:finngen_R11_M13_RHEUMA	TLR3++TLR3_NA_TLR3	Maximum likelihood	8	-0.0213542	0.0272484	0.433224	-0.0747611	0.0320527	0.978872	0.927965	1.03257	0.891932
TLR3	finngen_R11_M13_RHEUMA	Rheumatoid arthritis || id:finngen_R11_M13_RHEUMA	TLR3++TLR3_NA_TLR3	Simple mode	8	-0.0219254	0.0545057	0.699493	-0.128757	0.0849058	0.978313	0.879188	1.08861	0.994896
DBI	finngen_R11_M13_RHEUMA	Rheumatoid arthritis || id:finngen_R11_M13_RHEUMA	DBI++ACBP_NA_ACBP	Wald ratio	1	-0.100427	0.21536	0.640984	-0.522532	0.321677	0.904451	0.593017	1.37944	0.901574
PDGFD	finngen_R11_M13_RHEUMA	Rheumatoid arthritis || id:finngen_R11_M13_RHEUMA	PDGFD++PDGFD_NA_PDGFD	Inverse variance weighted	4	-0.0230369	0.0353713	0.51486	-0.0923647	0.0462908	0.977226	0.911773	1.04738	0.990373
PDGFD	finngen_R11_M13_RHEUMA	Rheumatoid arthritis || id:finngen_R11_M13_RHEUMA	PDGFD++PDGFD_NA_PDGFD	MR Egger	4	-0.0538065	0.0785132	0.563913	-0.207692	0.100079	0.947615	0.812457	1.10526	0.999671
PDGFD	finngen_R11_M13_RHEUMA	Rheumatoid arthritis || id:finngen_R11_M13_RHEUMA	PDGFD++PDGFD_NA_PDGFD	Weighted median	4	-0.0214525	0.0354894	0.545527	-0.0910118	0.0481068	0.978776	0.913007	1.04928	0.931419
PDGFD	finngen_R11_M13_RHEUMA	Rheumatoid arthritis || id:finngen_R11_M13_RHEUMA	PDGFD++PDGFD_NA_PDGFD	Weighted mode	4	-0.018535	0.0370719	0.651464	-0.0911958	0.0541259	0.981636	0.912839	1.05562	0.9821
PDGFD	finngen_R11_M13_RHEUMA	Rheumatoid arthritis || id:finngen_R11_M13_RHEUMA	PDGFD++PDGFD_NA_PDGFD	Maximum likelihood	4	-0.0230721	0.0343833	0.502203	-0.0904634	0.0443191	0.977192	0.913508	1.04532	0.9072
PDGFD	finngen_R11_M13_RHEUMA	Rheumatoid arthritis || id:finngen_R11_M13_RHEUMA	PDGFD++PDGFD_NA_PDGFD	Simple mode	4	-0.0205796	0.0764419	0.805215	-0.170406	0.129247	0.979631	0.843323	1.13797	0.994896
IRF3	finngen_R11_M13_RHEUMA	Rheumatoid arthritis || id:finngen_R11_M13_RHEUMA	IRF3++IRF_3	Wald ratio	1	0.376815	0.185425	0.0421365	0.013382	0.740249	1.45764	1.01347	2.09646	0.391167
KIR2DL3	finngen_R11_M13_RHEUMA	Rheumatoid arthritis || id:finngen_R11_M13_RHEUMA	KIR2DL3++KI2L3_NA_KI2L3	Inverse variance weighted	9	-0.0224688	0.016689	0.178199	-0.0551792	0.0102417	0.977782	0.946316	1.01029	0.909715
KIR2DL3	finngen_R11_M13_RHEUMA	Rheumatoid arthritis || id:finngen_R11_M13_RHEUMA	KIR2DL3++KI2L3_NA_KI2L3	MR Egger	9	-0.0506523	0.0301717	0.137086	-0.109789	0.00848426	0.950609	0.896023	1.00852	0.999671
KIR2DL3	finngen_R11_M13_RHEUMA	Rheumatoid arthritis || id:finngen_R11_M13_RHEUMA	KIR2DL3++KI2L3_NA_KI2L3	Weighted median	9	-0.0279736	0.0170415	0.100694	-0.0613749	0.00542771	0.972414	0.940471	1.00544	0.695711
KIR2DL3	finngen_R11_M13_RHEUMA	Rheumatoid arthritis || id:finngen_R11_M13_RHEUMA	KIR2DL3++KI2L3_NA_KI2L3	Weighted mode	9	-0.0274911	0.0165286	0.134834	-0.0598871	0.0049049	0.972883	0.941871	1.00492	0.976532
KIR2DL3	finngen_R11_M13_RHEUMA	Rheumatoid arthritis || id:finngen_R11_M13_RHEUMA	KIR2DL3++KI2L3_NA_KI2L3	Maximum likelihood	9	-0.0225512	0.0147643	0.126658	-0.0514892	0.00638682	0.977701	0.949814	1.00641	0.653719
KIR2DL3	finngen_R11_M13_RHEUMA	Rheumatoid arthritis || id:finngen_R11_M13_RHEUMA	KIR2DL3++KI2L3_NA_KI2L3	Simple mode	9	-0.0361555	0.0422722	0.417263	-0.119009	0.0466981	0.96449	0.8878	1.04781	0.994896
ANXA4	finngen_R11_M13_RHEUMA	Rheumatoid arthritis || id:finngen_R11_M13_RHEUMA	ANXA4++annexin_IV	Inverse variance weighted	2	0.00712251	0.0475508	0.880932	-0.086077	0.100322	1.00715	0.917524	1.10553	0.992378
ANXA4	finngen_R11_M13_RHEUMA	Rheumatoid arthritis || id:finngen_R11_M13_RHEUMA	ANXA4++annexin_IV	Maximum likelihood	2	0.00712445	0.0475667	0.88094	-0.0861063	0.100355	1.00715	0.917497	1.10556	0.976032
CALCB	finngen_R11_M13_RHEUMA	Rheumatoid arthritis || id:finngen_R11_M13_RHEUMA	CALCB++CALCB_NA_CALCB	Inverse variance weighted	2	0.0711097	0.0612224	0.24544	-0.0488863	0.191106	1.0737	0.952289	1.21059	0.956228
CALCB	finngen_R11_M13_RHEUMA	Rheumatoid arthritis || id:finngen_R11_M13_RHEUMA	CALCB++CALCB_NA_CALCB	Maximum likelihood	2	0.0711096	0.0612708	0.245813	-0.0489812	0.1912	1.0737	0.952199	1.2107	0.791309
OGN	finngen_R11_M13_RHEUMA	Rheumatoid arthritis || id:finngen_R11_M13_RHEUMA	OGN++MIME_NA_MIME	Inverse variance weighted	4	-0.0672091	0.0357076	0.0598083	-0.137196	0.0027779	0.935	0.871799	1.00278	0.705108
OGN	finngen_R11_M13_RHEUMA	Rheumatoid arthritis || id:finngen_R11_M13_RHEUMA	OGN++MIME_NA_MIME	MR Egger	4	-0.08156	0.102963	0.511317	-0.283367	0.120247	0.921677	0.753243	1.12778	0.999671
OGN	finngen_R11_M13_RHEUMA	Rheumatoid arthritis || id:finngen_R11_M13_RHEUMA	OGN++MIME_NA_MIME	Weighted median	4	-0.0662254	0.0374144	0.0767182	-0.139558	0.00710671	0.93592	0.869743	1.00713	0.624682
OGN	finngen_R11_M13_RHEUMA	Rheumatoid arthritis || id:finngen_R11_M13_RHEUMA	OGN++MIME_NA_MIME	Weighted mode	4	-0.0661223	0.0394209	0.192069	-0.143387	0.0111428	0.936016	0.866418	1.01121	0.976532
OGN	finngen_R11_M13_RHEUMA	Rheumatoid arthritis || id:finngen_R11_M13_RHEUMA	OGN++MIME_NA_MIME	Maximum likelihood	4	-0.0672223	0.0357301	0.0599191	-0.137253	0.0028088	0.934987	0.871749	1.00281	0.516226
OGN	finngen_R11_M13_RHEUMA	Rheumatoid arthritis || id:finngen_R11_M13_RHEUMA	OGN++MIME_NA_MIME	Simple mode	4	-0.0734069	0.0590107	0.301855	-0.189068	0.042254	0.929223	0.82773	1.04316	0.994896
AASDHPPT	finngen_R11_M13_RHEUMA	Rheumatoid arthritis || id:finngen_R11_M13_RHEUMA	AASDHPPT++ADPPT_NA_ADPPT	Wald ratio	1	0.446112	0.381898	0.242748	-0.302408	1.19463	1.56223	0.739037	3.30234	0.722258
GUK1	finngen_R11_M13_RHEUMA	Rheumatoid arthritis || id:finngen_R11_M13_RHEUMA	GUK1++KGUA_NA_KGUA	Inverse variance weighted	5	-0.09266	0.0451573	0.0401755	-0.181168	-0.00415176	0.911503	0.834295	0.995857	0.681766
GUK1	finngen_R11_M13_RHEUMA	Rheumatoid arthritis || id:finngen_R11_M13_RHEUMA	GUK1++KGUA_NA_KGUA	MR Egger	5	-0.0734333	0.089	0.469807	-0.247873	0.101007	0.929198	0.780459	1.10628	0.999671
GUK1	finngen_R11_M13_RHEUMA	Rheumatoid arthritis || id:finngen_R11_M13_RHEUMA	GUK1++KGUA_NA_KGUA	Weighted median	5	-0.0827394	0.0505152	0.10144	-0.181749	0.0162704	0.920591	0.83381	1.0164	0.695711
GUK1	finngen_R11_M13_RHEUMA	Rheumatoid arthritis || id:finngen_R11_M13_RHEUMA	GUK1++KGUA_NA_KGUA	Weighted mode	5	-0.084035	0.0513691	0.1772	-0.184718	0.0166484	0.919399	0.831338	1.01679	0.976532
GUK1	finngen_R11_M13_RHEUMA	Rheumatoid arthritis || id:finngen_R11_M13_RHEUMA	GUK1++KGUA_NA_KGUA	Maximum likelihood	5	-0.0927115	0.0453107	0.0407437	-0.18152	-0.00390258	0.911456	0.834001	0.996105	0.490676
GUK1	finngen_R11_M13_RHEUMA	Rheumatoid arthritis || id:finngen_R11_M13_RHEUMA	GUK1++KGUA_NA_KGUA	Simple mode	5	-0.0793096	0.0698626	0.319692	-0.21624	0.0576211	0.923754	0.805542	1.05931	0.994896
CNPY3	finngen_R11_M13_RHEUMA	Rheumatoid arthritis || id:finngen_R11_M13_RHEUMA	CNPY3++CNPY3_NA_CNPY3	Wald ratio	1	0.0575878	0.112893	0.609975	-0.163683	0.278859	1.05928	0.849011	1.32162	0.885657
ACADM	finngen_R11_M13_RHEUMA	Rheumatoid arthritis || id:finngen_R11_M13_RHEUMA	ACADM++ACADM_NA_ACADM	Wald ratio	1	0.0209637	0.061769	0.734317	-0.100103	0.142031	1.02118	0.904744	1.15261	0.935106
SNPH	finngen_R11_M13_RHEUMA	Rheumatoid arthritis || id:finngen_R11_M13_RHEUMA	SNPH++SNPH_NA_SNPH	Inverse variance weighted	2	0.00928261	0.161921	0.954284	-0.308082	0.326647	1.00933	0.734855	1.38631	0.996145
SNPH	finngen_R11_M13_RHEUMA	Rheumatoid arthritis || id:finngen_R11_M13_RHEUMA	SNPH++SNPH_NA_SNPH	Maximum likelihood	2	0.00936535	0.151936	0.950849	-0.288429	0.30716	1.00941	0.74944	1.35956	0.988848
SEPSECS	finngen_R11_M13_RHEUMA	Rheumatoid arthritis || id:finngen_R11_M13_RHEUMA	SEPSECS++SPCS_NA_SPCS	Wald ratio	1	0.181655	0.193091	0.346822	-0.196804	0.560114	1.1992	0.821352	1.75087	0.777232
ABHD10	finngen_R11_M13_RHEUMA	Rheumatoid arthritis || id:finngen_R11_M13_RHEUMA	ABHD10++ABHDA_NA_ABHDA	Wald ratio	1	-0.258337	0.256482	0.313824	-0.761042	0.244369	0.772335	0.467179	1.27681	0.756655
PFKM	finngen_R11_M13_RHEUMA	Rheumatoid arthritis || id:finngen_R11_M13_RHEUMA	PFKM++K6PF_NA_K6PF	Wald ratio	1	-0.0236449	0.0819007	0.77281	-0.18417	0.13688	0.976632	0.831794	1.14669	0.94274
ADH1A	finngen_R11_M13_RHEUMA	Rheumatoid arthritis || id:finngen_R11_M13_RHEUMA	ADH1A++ADH1A_NA_ADH1A	Wald ratio	1	-0.324035	0.229254	0.157528	-0.773372	0.125302	0.723225	0.461454	1.13349	0.644801
ACADSB	finngen_R11_M13_RHEUMA	Rheumatoid arthritis || id:finngen_R11_M13_RHEUMA	ACADSB++acyl_Coenzyme_A_dehydrogenase	Inverse variance weighted	2	0.084514	0.100249	0.399206	-0.111974	0.281002	1.08819	0.894067	1.32446	0.990373
ACADSB	finngen_R11_M13_RHEUMA	Rheumatoid arthritis || id:finngen_R11_M13_RHEUMA	ACADSB++acyl_Coenzyme_A_dehydrogenase	Maximum likelihood	2	0.0846129	0.100462	0.399655	-0.112293	0.281519	1.0883	0.893783	1.32514	0.890655
PMM1	finngen_R11_M13_RHEUMA	Rheumatoid arthritis || id:finngen_R11_M13_RHEUMA	PMM1++PMM1_NA_PMM1	Wald ratio	1	0.59024	0.233952	0.0116388	0.131694	1.04879	1.80442	1.14076	2.85418	0.209123
CETN3	finngen_R11_M13_RHEUMA	Rheumatoid arthritis || id:finngen_R11_M13_RHEUMA	CETN3++CETN3_NA_CETN3	Wald ratio	1	-0.141593	0.195271	0.468383	-0.524324	0.241138	0.867974	0.591955	1.2727	0.853181
TES	finngen_R11_M13_RHEUMA	Rheumatoid arthritis || id:finngen_R11_M13_RHEUMA	TES++TES_NA_TES	Wald ratio	1	-0.0472441	0.246349	0.847917	-0.530088	0.4356	0.953855	0.588553	1.54589	0.946505
ETFA	finngen_R11_M13_RHEUMA	Rheumatoid arthritis || id:finngen_R11_M13_RHEUMA	ETFA++ETFA_NA_ETFA	Wald ratio	1	-0.0391374	0.215589	0.855946	-0.461693	0.383418	0.961619	0.630216	1.46729	0.948945
SFRP4	finngen_R11_M13_RHEUMA	Rheumatoid arthritis || id:finngen_R11_M13_RHEUMA	SFRP4++SFRP4_NA_SFRP4	Inverse variance weighted	2	0.0067075	0.0546037	0.902234	-0.100316	0.113731	1.00673	0.904552	1.12045	0.99267
SFRP4	finngen_R11_M13_RHEUMA	Rheumatoid arthritis || id:finngen_R11_M13_RHEUMA	SFRP4++SFRP4_NA_SFRP4	Maximum likelihood	2	0.00671038	0.0546131	0.902209	-0.100331	0.113752	1.00673	0.904538	1.12047	0.981043
CP	finngen_R11_M13_RHEUMA	Rheumatoid arthritis || id:finngen_R11_M13_RHEUMA	CP++Ceruloplasmin_NA_Ceruloplasmin	Inverse variance weighted	3	0.17086	0.098286	0.0821411	-0.0217806	0.363501	1.18632	0.978455	1.43836	0.760764
CP	finngen_R11_M13_RHEUMA	Rheumatoid arthritis || id:finngen_R11_M13_RHEUMA	CP++Ceruloplasmin_NA_Ceruloplasmin	MR Egger	3	0.814808	0.813525	0.499498	-0.779701	2.40932	2.25874	0.458543	11.1263	0.999671
CP	finngen_R11_M13_RHEUMA	Rheumatoid arthritis || id:finngen_R11_M13_RHEUMA	CP++Ceruloplasmin_NA_Ceruloplasmin	Weighted median	3	0.168316	0.105608	0.110986	-0.0386759	0.375308	1.18331	0.962062	1.45544	0.71668
CP	finngen_R11_M13_RHEUMA	Rheumatoid arthritis || id:finngen_R11_M13_RHEUMA	CP++Ceruloplasmin_NA_Ceruloplasmin	Weighted mode	3	0.178519	0.11749	0.268002	-0.0517619	0.4088	1.19545	0.949555	1.50501	0.976532
CP	finngen_R11_M13_RHEUMA	Rheumatoid arthritis || id:finngen_R11_M13_RHEUMA	CP++Ceruloplasmin_NA_Ceruloplasmin	Maximum likelihood	3	0.170631	0.1001	0.0882667	-0.0255643	0.366827	1.18605	0.97476	1.44315	0.588445
CP	finngen_R11_M13_RHEUMA	Rheumatoid arthritis || id:finngen_R11_M13_RHEUMA	CP++Ceruloplasmin_NA_Ceruloplasmin	Simple mode	3	0.183978	0.157673	0.363582	-0.125061	0.493018	1.20199	0.882443	1.63725	0.994896
GOLM1	finngen_R11_M13_RHEUMA	Rheumatoid arthritis || id:finngen_R11_M13_RHEUMA	GOLM1++GOLM1_NA_GOLM1	Inverse variance weighted	2	-0.0568757	0.070939	0.422695	-0.195916	0.0821648	0.944712	0.822081	1.08563	0.990373
GOLM1	finngen_R11_M13_RHEUMA	Rheumatoid arthritis || id:finngen_R11_M13_RHEUMA	GOLM1++GOLM1_NA_GOLM1	Maximum likelihood	2	-0.0569996	0.0586949	0.331491	-0.172042	0.0580425	0.944594	0.841944	1.05976	0.855362
SH3BGRL3	finngen_R11_M13_RHEUMA	Rheumatoid arthritis || id:finngen_R11_M13_RHEUMA	SH3BGRL3++SH3BGRL3_like_protein	Inverse variance weighted	4	-0.0556964	0.0411188	0.175569	-0.136289	0.0248965	0.945826	0.87259	1.02521	0.909715
SH3BGRL3	finngen_R11_M13_RHEUMA	Rheumatoid arthritis || id:finngen_R11_M13_RHEUMA	SH3BGRL3++SH3BGRL3_like_protein	MR Egger	4	-0.0802172	0.0783693	0.413681	-0.233821	0.0733866	0.922916	0.791503	1.07615	0.999671
SH3BGRL3	finngen_R11_M13_RHEUMA	Rheumatoid arthritis || id:finngen_R11_M13_RHEUMA	SH3BGRL3++SH3BGRL3_like_protein	Weighted median	4	-0.0556413	0.0453739	0.220092	-0.144574	0.0332916	0.945878	0.865391	1.03385	0.834332
SH3BGRL3	finngen_R11_M13_RHEUMA	Rheumatoid arthritis || id:finngen_R11_M13_RHEUMA	SH3BGRL3++SH3BGRL3_like_protein	Weighted mode	4	-0.0562841	0.0443134	0.2936	-0.143138	0.0305702	0.945271	0.866634	1.03104	0.976532
SH3BGRL3	finngen_R11_M13_RHEUMA	Rheumatoid arthritis || id:finngen_R11_M13_RHEUMA	SH3BGRL3++SH3BGRL3_like_protein	Maximum likelihood	4	-0.055835	0.0411417	0.174737	-0.136473	0.0248028	0.945695	0.87243	1.02511	0.716871
SH3BGRL3	finngen_R11_M13_RHEUMA	Rheumatoid arthritis || id:finngen_R11_M13_RHEUMA	SH3BGRL3++SH3BGRL3_like_protein	Simple mode	4	-0.0480133	0.0728433	0.556889	-0.190786	0.0947595	0.953121	0.826309	1.09939	0.994896
RAB21	finngen_R11_M13_RHEUMA	Rheumatoid arthritis || id:finngen_R11_M13_RHEUMA	RAB21++RAB21_NA_RAB21	Wald ratio	1	0.13936	0.257314	0.588097	-0.364975	0.643695	1.14954	0.694214	1.9035	0.885657
HSPA13	finngen_R11_M13_RHEUMA	Rheumatoid arthritis || id:finngen_R11_M13_RHEUMA	HSPA13++STCH_NA_STCH	Wald ratio	1	-0.138025	0.129723	0.28733	-0.392283	0.116232	0.871077	0.675513	1.12326	0.747378
ACOT13	finngen_R11_M13_RHEUMA	Rheumatoid arthritis || id:finngen_R11_M13_RHEUMA	ACOT13++ACO13_NA_ACO13	Inverse variance weighted	2	0.0496667	0.33573	0.882393	-0.608363	0.707697	1.05092	0.544241	2.02931	0.992378
ACOT13	finngen_R11_M13_RHEUMA	Rheumatoid arthritis || id:finngen_R11_M13_RHEUMA	ACOT13++ACO13_NA_ACO13	Maximum likelihood	2	0.0513134	0.182144	0.778159	-0.305689	0.408315	1.05265	0.736616	1.50428	0.961593
CD160	finngen_R11_M13_RHEUMA	Rheumatoid arthritis || id:finngen_R11_M13_RHEUMA	CD160++BY55_NA_BY55	Wald ratio	1	0.0297759	0.0949063	0.753719	-0.156241	0.215792	1.03022	0.855353	1.24084	0.94077
EPHB1	finngen_R11_M13_RHEUMA	Rheumatoid arthritis || id:finngen_R11_M13_RHEUMA	EPHB1++EPHB1_NA_EPHB1	Inverse variance weighted	3	-0.0261638	0.0542127	0.62937	-0.132421	0.0800931	0.974176	0.875972	1.08339	0.990373
EPHB1	finngen_R11_M13_RHEUMA	Rheumatoid arthritis || id:finngen_R11_M13_RHEUMA	EPHB1++EPHB1_NA_EPHB1	MR Egger	3	-0.0943225	0.150095	0.642822	-0.388508	0.199863	0.909989	0.678068	1.22124	0.999671
EPHB1	finngen_R11_M13_RHEUMA	Rheumatoid arthritis || id:finngen_R11_M13_RHEUMA	EPHB1++EPHB1_NA_EPHB1	Weighted median	3	-0.028669	0.0409542	0.483911	-0.108939	0.0516012	0.971738	0.896785	1.05296	0.907615
EPHB1	finngen_R11_M13_RHEUMA	Rheumatoid arthritis || id:finngen_R11_M13_RHEUMA	EPHB1++EPHB1_NA_EPHB1	Weighted mode	3	-0.019889	0.0462076	0.70883	-0.110456	0.070678	0.980308	0.895426	1.07324	0.9821
EPHB1	finngen_R11_M13_RHEUMA	Rheumatoid arthritis || id:finngen_R11_M13_RHEUMA	EPHB1++EPHB1_NA_EPHB1	Maximum likelihood	3	-0.0262237	0.0371455	0.480205	-0.0990289	0.0465815	0.974117	0.905717	1.04768	0.9072
EPHB1	finngen_R11_M13_RHEUMA	Rheumatoid arthritis || id:finngen_R11_M13_RHEUMA	EPHB1++EPHB1_NA_EPHB1	Simple mode	3	-0.019889	0.0636442	0.784233	-0.144632	0.104854	0.980308	0.865341	1.11055	0.994896
CD46	finngen_R11_M13_RHEUMA	Rheumatoid arthritis || id:finngen_R11_M13_RHEUMA	CD46++CD46_NA_CD46	Inverse variance weighted	2	0.0464892	0.0501004	0.353449	-0.0517077	0.144686	1.04759	0.949606	1.15568	0.990373
CD46	finngen_R11_M13_RHEUMA	Rheumatoid arthritis || id:finngen_R11_M13_RHEUMA	CD46++CD46_NA_CD46	Maximum likelihood	2	0.046523	0.0501398	0.353477	-0.051751	0.144797	1.04762	0.949565	1.1558	0.870981
APOA4	finngen_R11_M13_RHEUMA	Rheumatoid arthritis || id:finngen_R11_M13_RHEUMA	APOA4++Apo_A_IV	Wald ratio	1	0.191896	0.143066	0.179821	-0.0885142	0.472306	1.21154	0.91529	1.60369	0.679143
TBCB	finngen_R11_M13_RHEUMA	Rheumatoid arthritis || id:finngen_R11_M13_RHEUMA	TBCB++TBCB_NA_TBCB	Wald ratio	1	-0.191494	0.204741	0.349636	-0.592787	0.2098	0.825725	0.552785	1.23343	0.777232
TPP1	finngen_R11_M13_RHEUMA	Rheumatoid arthritis || id:finngen_R11_M13_RHEUMA	TPP1++TPP1_NA_TPP1	Inverse variance weighted	5	-0.0319192	0.058212	0.583468	-0.146015	0.0821764	0.968585	0.864145	1.08565	0.990373
TPP1	finngen_R11_M13_RHEUMA	Rheumatoid arthritis || id:finngen_R11_M13_RHEUMA	TPP1++TPP1_NA_TPP1	MR Egger	5	-0.115579	0.150643	0.498794	-0.41084	0.179682	0.89085	0.663093	1.19684	0.999671
TPP1	finngen_R11_M13_RHEUMA	Rheumatoid arthritis || id:finngen_R11_M13_RHEUMA	TPP1++TPP1_NA_TPP1	Weighted median	5	-0.0452213	0.0653153	0.488715	-0.173239	0.0827967	0.955786	0.840936	1.08632	0.908084
TPP1	finngen_R11_M13_RHEUMA	Rheumatoid arthritis || id:finngen_R11_M13_RHEUMA	TPP1++TPP1_NA_TPP1	Weighted mode	5	-0.0556862	0.0739747	0.493464	-0.200677	0.0893041	0.945836	0.818177	1.09341	0.976532
TPP1	finngen_R11_M13_RHEUMA	Rheumatoid arthritis || id:finngen_R11_M13_RHEUMA	TPP1++TPP1_NA_TPP1	Maximum likelihood	5	-0.0320505	0.0583434	0.582771	-0.146403	0.0823025	0.968458	0.863809	1.08578	0.925963
TPP1	finngen_R11_M13_RHEUMA	Rheumatoid arthritis || id:finngen_R11_M13_RHEUMA	TPP1++TPP1_NA_TPP1	Simple mode	5	-0.0472013	0.0831495	0.600606	-0.210174	0.115772	0.953895	0.810443	1.12274	0.994896
PSME2	finngen_R11_M13_RHEUMA	Rheumatoid arthritis || id:finngen_R11_M13_RHEUMA	PSME2++PSME2_NA_PSME2	Inverse variance weighted	3	0.0316512	0.0729618	0.66443	-0.111354	0.174656	1.03216	0.894622	1.19084	0.990373
PSME2	finngen_R11_M13_RHEUMA	Rheumatoid arthritis || id:finngen_R11_M13_RHEUMA	PSME2++PSME2_NA_PSME2	MR Egger	3	0.0360092	0.0944383	0.768091	-0.14909	0.221108	1.03667	0.861492	1.24746	0.999671
PSME2	finngen_R11_M13_RHEUMA	Rheumatoid arthritis || id:finngen_R11_M13_RHEUMA	PSME2++PSME2_NA_PSME2	Weighted median	3	0.027343	0.0741861	0.712446	-0.118062	0.172748	1.02772	0.888641	1.18857	0.97887
PSME2	finngen_R11_M13_RHEUMA	Rheumatoid arthritis || id:finngen_R11_M13_RHEUMA	PSME2++PSME2_NA_PSME2	Weighted mode	3	0.0257317	0.0909427	0.803816	-0.152516	0.203979	1.02607	0.858545	1.22627	0.984041
PSME2	finngen_R11_M13_RHEUMA	Rheumatoid arthritis || id:finngen_R11_M13_RHEUMA	PSME2++PSME2_NA_PSME2	Maximum likelihood	3	0.0316539	0.0729805	0.664484	-0.111388	0.174696	1.03216	0.894592	1.19088	0.93286
PSME2	finngen_R11_M13_RHEUMA	Rheumatoid arthritis || id:finngen_R11_M13_RHEUMA	PSME2++PSME2_NA_PSME2	Simple mode	3	0.0213594	0.102701	0.854504	-0.179935	0.222654	1.02159	0.835324	1.24939	0.994896
OVCA2	finngen_R11_M13_RHEUMA	Rheumatoid arthritis || id:finngen_R11_M13_RHEUMA	OVCA2++OVCA2_NA_OVCA2	Wald ratio	1	-0.116085	0.102294	0.256451	-0.316582	0.0844112	0.890399	0.728635	1.08808	0.722927
WBP2	finngen_R11_M13_RHEUMA	Rheumatoid arthritis || id:finngen_R11_M13_RHEUMA	WBP2++WBP2_NA_WBP2	Wald ratio	1	-0.0703058	0.278315	0.800568	-0.615803	0.475191	0.932109	0.540207	1.60832	0.94274
UGT1A1	finngen_R11_M13_RHEUMA	Rheumatoid arthritis || id:finngen_R11_M13_RHEUMA	UGT1A1++UGT_1A1	Inverse variance weighted	2	-0.0357662	0.0848271	0.673291	-0.202027	0.130495	0.964866	0.817073	1.13939	0.990373
UGT1A1	finngen_R11_M13_RHEUMA	Rheumatoid arthritis || id:finngen_R11_M13_RHEUMA	UGT1A1++UGT_1A1	Maximum likelihood	2	-0.0358507	0.0546977	0.512188	-0.143058	0.0713567	0.964784	0.866704	1.07396	0.9072
PPP1R1A	finngen_R11_M13_RHEUMA	Rheumatoid arthritis || id:finngen_R11_M13_RHEUMA	PPP1R1A++PPR1A_NA_PPR1A	Wald ratio	1	0.201562	0.208205	0.332999	-0.206521	0.609644	1.22331	0.81341	1.83978	0.772525
IDI1	finngen_R11_M13_RHEUMA	Rheumatoid arthritis || id:finngen_R11_M13_RHEUMA	IDI1++IDI1_NA_IDI1	Wald ratio	1	-0.697701	0.440496	0.113217	-1.56107	0.165672	0.497728	0.209911	1.18019	0.56315
FKBP4	finngen_R11_M13_RHEUMA	Rheumatoid arthritis || id:finngen_R11_M13_RHEUMA	FKBP4++FKBP52_protein	Inverse variance weighted	2	-0.0448202	0.161612	0.781525	-0.36158	0.271939	0.956169	0.696575	1.31251	0.990373
FKBP4	finngen_R11_M13_RHEUMA	Rheumatoid arthritis || id:finngen_R11_M13_RHEUMA	FKBP4++FKBP52_protein	Maximum likelihood	2	-0.0450823	0.162136	0.780972	-0.362869	0.272705	0.955919	0.695677	1.31351	0.963099
WWOX	finngen_R11_M13_RHEUMA	Rheumatoid arthritis || id:finngen_R11_M13_RHEUMA	WWOX++WWOX_NA_WWOX	Wald ratio	1	0.306118	0.179129	0.0874658	-0.0449758	0.657212	1.35814	0.956021	1.92941	0.541774
SAR1A	finngen_R11_M13_RHEUMA	Rheumatoid arthritis || id:finngen_R11_M13_RHEUMA	SAR1A++SAR1A_NA_SAR1A	Inverse variance weighted	2	-0.0110596	0.0818355	0.892498	-0.171457	0.149338	0.989001	0.842436	1.16107	0.992378
SAR1A	finngen_R11_M13_RHEUMA	Rheumatoid arthritis || id:finngen_R11_M13_RHEUMA	SAR1A++SAR1A_NA_SAR1A	Maximum likelihood	2	-0.0110761	0.0818757	0.892391	-0.171553	0.1494	0.988985	0.842356	1.16114	0.976032
IVD	finngen_R11_M13_RHEUMA	Rheumatoid arthritis || id:finngen_R11_M13_RHEUMA	IVD++IVD_NA_IVD	Inverse variance weighted	2	0.0652663	0.0915489	0.4759	-0.11417	0.244702	1.06744	0.892107	1.27724	0.990373
IVD	finngen_R11_M13_RHEUMA	Rheumatoid arthritis || id:finngen_R11_M13_RHEUMA	IVD++IVD_NA_IVD	Maximum likelihood	2	0.0652708	0.0916393	0.476305	-0.114342	0.244884	1.06745	0.891953	1.27747	0.9072
CRNN	finngen_R11_M13_RHEUMA	Rheumatoid arthritis || id:finngen_R11_M13_RHEUMA	CRNN++CRNN_NA_CRNN	Wald ratio	1	0.180333	0.111543	0.105941	-0.0382915	0.398958	1.19762	0.962432	1.49027	0.542273
HADH	finngen_R11_M13_RHEUMA	Rheumatoid arthritis || id:finngen_R11_M13_RHEUMA	HADH++HCDH_NA_HCDH	Wald ratio	1	0.36041	0.174706	0.0391177	0.0179854	0.702834	1.43392	1.01815	2.01947	0.381769
FIS1	finngen_R11_M13_RHEUMA	Rheumatoid arthritis || id:finngen_R11_M13_RHEUMA	FIS1++FIS1_NA_FIS1	Wald ratio	1	0.152543	0.0816969	0.0618753	-0.00758245	0.312669	1.16479	0.992446	1.36707	0.472117
TP53I3	finngen_R11_M13_RHEUMA	Rheumatoid arthritis || id:finngen_R11_M13_RHEUMA	TP53I3++QORX_NA_QORX	Inverse variance weighted	6	-0.0212091	0.0335799	0.527647	-0.0870257	0.0446075	0.979014	0.916654	1.04562	0.990373
TP53I3	finngen_R11_M13_RHEUMA	Rheumatoid arthritis || id:finngen_R11_M13_RHEUMA	TP53I3++QORX_NA_QORX	MR Egger	6	-0.0323157	0.0598106	0.617668	-0.149544	0.084913	0.968201	0.8611	1.08862	0.999671
TP53I3	finngen_R11_M13_RHEUMA	Rheumatoid arthritis || id:finngen_R11_M13_RHEUMA	TP53I3++QORX_NA_QORX	Weighted median	6	-0.0111511	0.0296901	0.707226	-0.0693437	0.0470415	0.988911	0.933006	1.04817	0.97421
TP53I3	finngen_R11_M13_RHEUMA	Rheumatoid arthritis || id:finngen_R11_M13_RHEUMA	TP53I3++QORX_NA_QORX	Weighted mode	6	-0.00989206	0.0303605	0.757755	-0.0693987	0.0496146	0.990157	0.932955	1.05087	0.984041
TP53I3	finngen_R11_M13_RHEUMA	Rheumatoid arthritis || id:finngen_R11_M13_RHEUMA	TP53I3++QORX_NA_QORX	Maximum likelihood	6	-0.0212107	0.028422	0.4555	-0.0769177	0.0344964	0.979013	0.925966	1.0351	0.895805
TP53I3	finngen_R11_M13_RHEUMA	Rheumatoid arthritis || id:finngen_R11_M13_RHEUMA	TP53I3++QORX_NA_QORX	Simple mode	6	-0.0266573	0.0740342	0.733506	-0.171764	0.11845	0.973695	0.842178	1.12575	0.994896
CRYBB1	finngen_R11_M13_RHEUMA	Rheumatoid arthritis || id:finngen_R11_M13_RHEUMA	CRYBB1++CRBB1_NA_CRBB1	Wald ratio	1	-0.148503	0.0721927	0.0396821	-0.290001	-0.00700576	0.861997	0.748263	0.993019	0.381769
UGDH	finngen_R11_M13_RHEUMA	Rheumatoid arthritis || id:finngen_R11_M13_RHEUMA	UGDH++UGDH_NA_UGDH	Inverse variance weighted	2	0.0301864	0.0436861	0.489575	-0.0554382	0.115811	1.03065	0.94607	1.12278	0.990373
UGDH	finngen_R11_M13_RHEUMA	Rheumatoid arthritis || id:finngen_R11_M13_RHEUMA	UGDH++UGDH_NA_UGDH	Maximum likelihood	2	0.0301972	0.0437041	0.4896	-0.0554629	0.115857	1.03066	0.946047	1.12284	0.9072
DCTD	finngen_R11_M13_RHEUMA	Rheumatoid arthritis || id:finngen_R11_M13_RHEUMA	DCTD++DCTD_NA_DCTD	Inverse variance weighted	2	-0.126234	0.128235	0.324924	-0.377575	0.125108	0.881409	0.685522	1.13327	0.986776
DCTD	finngen_R11_M13_RHEUMA	Rheumatoid arthritis || id:finngen_R11_M13_RHEUMA	DCTD++DCTD_NA_DCTD	Maximum likelihood	2	-0.126541	0.128875	0.326154	-0.379137	0.126054	0.881138	0.684452	1.13434	0.855362
DCXR	finngen_R11_M13_RHEUMA	Rheumatoid arthritis || id:finngen_R11_M13_RHEUMA	DCXR++DCXR_NA_DCXR	Inverse variance weighted	2	-0.0958773	0.091936	0.297009	-0.276072	0.0843173	0.908576	0.758758	1.08797	0.986776
DCXR	finngen_R11_M13_RHEUMA	Rheumatoid arthritis || id:finngen_R11_M13_RHEUMA	DCXR++DCXR_NA_DCXR	Maximum likelihood	2	-0.0960263	0.0918378	0.295742	-0.276028	0.0839757	0.90844	0.758791	1.0876	0.834962
NUDT5	finngen_R11_M13_RHEUMA	Rheumatoid arthritis || id:finngen_R11_M13_RHEUMA	NUDT5++NUDT5_NA_NUDT5	Wald ratio	1	0.147176	0.172756	0.394252	-0.191426	0.485779	1.15856	0.825781	1.62544	0.789923
RHOC	finngen_R11_M13_RHEUMA	Rheumatoid arthritis || id:finngen_R11_M13_RHEUMA	RHOC++RHOC_NA_RHOC	Wald ratio	1	0.167433	0.123502	0.175192	-0.0746311	0.409497	1.18227	0.928086	1.50606	0.668368
SNUPN	finngen_R11_M13_RHEUMA	Rheumatoid arthritis || id:finngen_R11_M13_RHEUMA	SNUPN++SPN1_NA_SPN1	Wald ratio	1	0.171288	0.103327	0.0973737	-0.0312336	0.373809	1.18683	0.969249	1.45326	0.541774
PCNP	finngen_R11_M13_RHEUMA	Rheumatoid arthritis || id:finngen_R11_M13_RHEUMA	PCNP++PCNP_NA_PCNP	Wald ratio	1	0.140055	0.150246	0.351249	-0.154428	0.434538	1.15034	0.856905	1.54425	0.777232
NAPG	finngen_R11_M13_RHEUMA	Rheumatoid arthritis || id:finngen_R11_M13_RHEUMA	NAPG++SNAG_NA_SNAG	Wald ratio	1	-0.0303662	0.169245	0.857607	-0.362086	0.301354	0.97009	0.696222	1.35169	0.948945
PECR	finngen_R11_M13_RHEUMA	Rheumatoid arthritis || id:finngen_R11_M13_RHEUMA	PECR++PECR_NA_PECR	Wald ratio	1	-0.192753	0.160144	0.228734	-0.506635	0.121129	0.824685	0.60252	1.12877	0.722258
MAP1LC3A	finngen_R11_M13_RHEUMA	Rheumatoid arthritis || id:finngen_R11_M13_RHEUMA	MAP1LC3A++MLP3A_NA_MLP3A	Wald ratio	1	0.03122	0.2498	0.90054	-0.458389	0.520829	1.03171	0.632302	1.68342	0.959083
ACAA1	finngen_R11_M13_RHEUMA	Rheumatoid arthritis || id:finngen_R11_M13_RHEUMA	ACAA1++THIK_NA_THIK	Inverse variance weighted	5	-0.0678952	0.0521301	0.192773	-0.17007	0.0342797	0.934358	0.843606	1.03487	0.927309
ACAA1	finngen_R11_M13_RHEUMA	Rheumatoid arthritis || id:finngen_R11_M13_RHEUMA	ACAA1++THIK_NA_THIK	MR Egger	5	-0.0580519	0.0740589	0.490315	-0.203207	0.0871035	0.943601	0.816109	1.09101	0.999671
ACAA1	finngen_R11_M13_RHEUMA	Rheumatoid arthritis || id:finngen_R11_M13_RHEUMA	ACAA1++THIK_NA_THIK	Weighted median	5	-0.0643165	0.0558247	0.249274	-0.173733	0.0451	0.937708	0.840521	1.04613	0.858342
ACAA1	finngen_R11_M13_RHEUMA	Rheumatoid arthritis || id:finngen_R11_M13_RHEUMA	ACAA1++THIK_NA_THIK	Weighted mode	5	-0.0640453	0.054983	0.308823	-0.171812	0.0437213	0.937963	0.842138	1.04469	0.976532
ACAA1	finngen_R11_M13_RHEUMA	Rheumatoid arthritis || id:finngen_R11_M13_RHEUMA	ACAA1++THIK_NA_THIK	Maximum likelihood	5	-0.0679063	0.0521566	0.192927	-0.170133	0.0343206	0.934348	0.843552	1.03492	0.752884
ACAA1	finngen_R11_M13_RHEUMA	Rheumatoid arthritis || id:finngen_R11_M13_RHEUMA	ACAA1++THIK_NA_THIK	Simple mode	5	-0.0634177	0.0829018	0.486927	-0.225905	0.0990698	0.938551	0.797794	1.10414	0.994896
MMAB	finngen_R11_M13_RHEUMA	Rheumatoid arthritis || id:finngen_R11_M13_RHEUMA	MMAB++MMAB_NA_MMAB	Inverse variance weighted	6	-0.0277641	0.0468557	0.553486	-0.119601	0.0640731	0.972618	0.887274	1.06617	0.990373
MMAB	finngen_R11_M13_RHEUMA	Rheumatoid arthritis || id:finngen_R11_M13_RHEUMA	MMAB++MMAB_NA_MMAB	MR Egger	6	-0.0639462	0.0810278	0.474148	-0.222761	0.0948682	0.938055	0.800306	1.09951	0.999671
MMAB	finngen_R11_M13_RHEUMA	Rheumatoid arthritis || id:finngen_R11_M13_RHEUMA	MMAB++MMAB_NA_MMAB	Weighted median	6	-0.0493382	0.0453525	0.276646	-0.138229	0.0395526	0.951859	0.870899	1.04035	0.88365
MMAB	finngen_R11_M13_RHEUMA	Rheumatoid arthritis || id:finngen_R11_M13_RHEUMA	MMAB++MMAB_NA_MMAB	Weighted mode	6	-0.0533546	0.0482213	0.318902	-0.147868	0.0411592	0.948044	0.862545	1.04202	0.976532
MMAB	finngen_R11_M13_RHEUMA	Rheumatoid arthritis || id:finngen_R11_M13_RHEUMA	MMAB++MMAB_NA_MMAB	Maximum likelihood	6	-0.0278579	0.0423777	0.510942	-0.110918	0.0552024	0.972527	0.895012	1.05675	0.9072
MMAB	finngen_R11_M13_RHEUMA	Rheumatoid arthritis || id:finngen_R11_M13_RHEUMA	MMAB++MMAB_NA_MMAB	Simple mode	6	-0.0851566	0.109998	0.473829	-0.300752	0.130439	0.918368	0.740261	1.13933	0.994896
GGPS1	finngen_R11_M13_RHEUMA	Rheumatoid arthritis || id:finngen_R11_M13_RHEUMA	GGPS1++GGPPS_NA_GGPPS	Wald ratio	1	-0.080653	0.15562	0.60427	-0.385667	0.224361	0.922514	0.679997	1.25152	0.885657
ECHS1	finngen_R11_M13_RHEUMA	Rheumatoid arthritis || id:finngen_R11_M13_RHEUMA	ECHS1++Enoyl_CoA_hydratase	Wald ratio	1	0.0231075	0.278193	0.933802	-0.52215	0.568365	1.02338	0.593243	1.76538	0.97599
HPCAL1	finngen_R11_M13_RHEUMA	Rheumatoid arthritis || id:finngen_R11_M13_RHEUMA	HPCAL1++HPCL1_NA_HPCL1	Wald ratio	1	0.0400634	0.106345	0.706374	-0.168373	0.248499	1.04088	0.845039	1.2821	0.930618
PGLS	finngen_R11_M13_RHEUMA	Rheumatoid arthritis || id:finngen_R11_M13_RHEUMA	PGLS++6PGL_NA_6PGL	Inverse variance weighted	3	0.151059	0.0907036	0.0958295	-0.0267197	0.328839	1.16307	0.973634	1.38935	0.77965
PGLS	finngen_R11_M13_RHEUMA	Rheumatoid arthritis || id:finngen_R11_M13_RHEUMA	PGLS++6PGL_NA_6PGL	MR Egger	3	0.201156	0.188396	0.479155	-0.168101	0.570413	1.22282	0.845269	1.769	0.999671
PGLS	finngen_R11_M13_RHEUMA	Rheumatoid arthritis || id:finngen_R11_M13_RHEUMA	PGLS++6PGL_NA_6PGL	Weighted median	3	0.154967	0.0877579	0.0774211	-0.0170382	0.326973	1.16762	0.983106	1.38676	0.624682
PGLS	finngen_R11_M13_RHEUMA	Rheumatoid arthritis || id:finngen_R11_M13_RHEUMA	PGLS++6PGL_NA_6PGL	Weighted mode	3	0.2195	0.0914116	0.138337	0.0403333	0.398667	1.24545	1.04116	1.48984	0.976532
PGLS	finngen_R11_M13_RHEUMA	Rheumatoid arthritis || id:finngen_R11_M13_RHEUMA	PGLS++6PGL_NA_6PGL	Maximum likelihood	3	0.151407	0.0788533	0.0548437	-0.0031453	0.30596	1.16347	0.99686	1.35793	0.516176
PGLS	finngen_R11_M13_RHEUMA	Rheumatoid arthritis || id:finngen_R11_M13_RHEUMA	PGLS++6PGL_NA_6PGL	Simple mode	3	0.0276121	0.159827	0.87874	-0.285648	0.340872	1.028	0.751527	1.40617	0.994896
NANS	finngen_R11_M13_RHEUMA	Rheumatoid arthritis || id:finngen_R11_M13_RHEUMA	NANS++SIAS_NA_SIAS	Wald ratio	1	-0.0671121	0.165185	0.684534	-0.390875	0.256651	0.93509	0.676464	1.29259	0.921545
NIT2	finngen_R11_M13_RHEUMA	Rheumatoid arthritis || id:finngen_R11_M13_RHEUMA	NIT2++NIT2_NA_NIT2	Wald ratio	1	0.132805	0.208237	0.523631	-0.27534	0.540949	1.14203	0.759314	1.71764	0.859133
BPHL	finngen_R11_M13_RHEUMA	Rheumatoid arthritis || id:finngen_R11_M13_RHEUMA	BPHL++BPHL_NA_BPHL	Wald ratio	1	-0.213767	0.111079	0.054298	-0.431482	0.0039487	0.807537	0.649546	1.00396	0.444765
BPNT1	finngen_R11_M13_RHEUMA	Rheumatoid arthritis || id:finngen_R11_M13_RHEUMA	BPNT1++BPNT1_NA_BPNT1	Wald ratio	1	-0.0586232	0.219755	0.789649	-0.489342	0.372096	0.943062	0.613029	1.45077	0.94274
FAHD1	finngen_R11_M13_RHEUMA	Rheumatoid arthritis || id:finngen_R11_M13_RHEUMA	FAHD1++FAHD1_NA_FAHD1	Wald ratio	1	-0.496564	0.252377	0.0491206	-0.991223	-0.00190376	0.608619	0.371122	0.998098	0.42273
NMT2	finngen_R11_M13_RHEUMA	Rheumatoid arthritis || id:finngen_R11_M13_RHEUMA	NMT2++NMT2_NA_NMT2	Wald ratio	1	0.114854	0.195692	0.557263	-0.268702	0.49841	1.12171	0.764371	1.6461	0.882579
S100A14	finngen_R11_M13_RHEUMA	Rheumatoid arthritis || id:finngen_R11_M13_RHEUMA	S100A14++S100A14_NA_S100A14	Wald ratio	1	0.149045	0.139857	0.28656	-0.125074	0.423164	1.16073	0.882431	1.52679	0.747378
IDI2	finngen_R11_M13_RHEUMA	Rheumatoid arthritis || id:finngen_R11_M13_RHEUMA	IDI2++IDI2_NA_IDI2	Wald ratio	1	0.310141	0.263265	0.238774	-0.205858	0.826139	1.36362	0.813948	2.28448	0.722258
S100A16	finngen_R11_M13_RHEUMA	Rheumatoid arthritis || id:finngen_R11_M13_RHEUMA	S100A16++S100A16_NA_S100A16	Inverse variance weighted	3	-0.0277705	0.0664962	0.676222	-0.158103	0.102562	0.972612	0.853762	1.10801	0.990373
S100A16	finngen_R11_M13_RHEUMA	Rheumatoid arthritis || id:finngen_R11_M13_RHEUMA	S100A16++S100A16_NA_S100A16	MR Egger	3	-0.87774	0.561494	0.362302	-1.97827	0.222787	0.415721	0.138309	1.24955	0.999671
S100A16	finngen_R11_M13_RHEUMA	Rheumatoid arthritis || id:finngen_R11_M13_RHEUMA	S100A16++S100A16_NA_S100A16	Weighted median	3	-0.0278297	0.0625261	0.656255	-0.150381	0.0947215	0.972554	0.86038	1.09935	0.969453
S100A16	finngen_R11_M13_RHEUMA	Rheumatoid arthritis || id:finngen_R11_M13_RHEUMA	S100A16++S100A16_NA_S100A16	Weighted mode	3	-0.048441	0.0648134	0.532752	-0.175475	0.0785933	0.952714	0.839058	1.08176	0.976532
S100A16	finngen_R11_M13_RHEUMA	Rheumatoid arthritis || id:finngen_R11_M13_RHEUMA	S100A16++S100A16_NA_S100A16	Maximum likelihood	3	-0.0278797	0.0598145	0.641142	-0.145116	0.0893568	0.972505	0.864922	1.09347	0.930695
S100A16	finngen_R11_M13_RHEUMA	Rheumatoid arthritis || id:finngen_R11_M13_RHEUMA	S100A16++S100A16_NA_S100A16	Simple mode	3	-0.0631525	0.109555	0.622542	-0.27788	0.151574	0.9388	0.757388	1.16366	0.994896
PPCS	finngen_R11_M13_RHEUMA	Rheumatoid arthritis || id:finngen_R11_M13_RHEUMA	PPCS++PPCS_NA_PPCS	Wald ratio	1	0.0268914	0.132649	0.839349	-0.2331	0.286883	1.02726	0.792074	1.33227	0.944479
NT5M	finngen_R11_M13_RHEUMA	Rheumatoid arthritis || id:finngen_R11_M13_RHEUMA	NT5M++NT5M_NA_NT5M	Wald ratio	1	0.0124903	0.110232	0.909785	-0.203564	0.228545	1.01257	0.815818	1.25677	0.965239
IRAK4	finngen_R11_M13_RHEUMA	Rheumatoid arthritis || id:finngen_R11_M13_RHEUMA	IRAK4++IRAK4_NA_IRAK4	Wald ratio	1	0.0541034	0.196786	0.783366	-0.331597	0.439804	1.05559	0.717776	1.5524	0.94274
AKR7A3	finngen_R11_M13_RHEUMA	Rheumatoid arthritis || id:finngen_R11_M13_RHEUMA	AKR7A3++ARK73_NA_ARK73	Inverse variance weighted	5	0.101672	0.059411	0.0870187	-0.0147732	0.218118	1.10702	0.985335	1.24373	0.774206
AKR7A3	finngen_R11_M13_RHEUMA	Rheumatoid arthritis || id:finngen_R11_M13_RHEUMA	AKR7A3++ARK73_NA_ARK73	MR Egger	5	0.0776238	0.144013	0.627314	-0.204642	0.35989	1.08072	0.814939	1.43317	0.999671
AKR7A3	finngen_R11_M13_RHEUMA	Rheumatoid arthritis || id:finngen_R11_M13_RHEUMA	AKR7A3++ARK73_NA_ARK73	Weighted median	5	0.120076	0.0580698	0.0386595	0.00625949	0.233893	1.12758	1.00628	1.26351	0.507742
AKR7A3	finngen_R11_M13_RHEUMA	Rheumatoid arthritis || id:finngen_R11_M13_RHEUMA	AKR7A3++ARK73_NA_ARK73	Weighted mode	5	0.122579	0.0609334	0.114579	0.00314926	0.242008	1.13041	1.00315	1.2738	0.976532
AKR7A3	finngen_R11_M13_RHEUMA	Rheumatoid arthritis || id:finngen_R11_M13_RHEUMA	AKR7A3++ARK73_NA_ARK73	Maximum likelihood	5	0.102036	0.0550563	0.0638387	-0.00587426	0.209946	1.10742	0.994143	1.23361	0.529625
AKR7A3	finngen_R11_M13_RHEUMA	Rheumatoid arthritis || id:finngen_R11_M13_RHEUMA	AKR7A3++ARK73_NA_ARK73	Simple mode	5	0.134919	0.0974255	0.238334	-0.0560355	0.325873	1.14444	0.945506	1.38524	0.994896
PDCD6IP	finngen_R11_M13_RHEUMA	Rheumatoid arthritis || id:finngen_R11_M13_RHEUMA	PDCD6IP++PDC6I_NA_PDC6I	Wald ratio	1	0.0466443	0.128452	0.716511	-0.205122	0.298411	1.04775	0.814548	1.34772	0.932469
VAT1	finngen_R11_M13_RHEUMA	Rheumatoid arthritis || id:finngen_R11_M13_RHEUMA	VAT1++VAT1_NA_VAT1	Wald ratio	1	0.120185	0.188811	0.524426	-0.249884	0.490255	1.12771	0.778891	1.63273	0.859133
RTN4IP1	finngen_R11_M13_RHEUMA	Rheumatoid arthritis || id:finngen_R11_M13_RHEUMA	RTN4IP1++RT4I1_NA_RT4I1	Wald ratio	1	-0.243237	0.195085	0.21246	-0.625603	0.139129	0.784086	0.534939	1.14927	0.715607
TSSC4	finngen_R11_M13_RHEUMA	Rheumatoid arthritis || id:finngen_R11_M13_RHEUMA	TSSC4++TSSC4_NA_TSSC4	Wald ratio	1	0.134112	0.262647	0.609619	-0.380675	0.648899	1.14352	0.6834	1.91343	0.885657
LDLRAP1	finngen_R11_M13_RHEUMA	Rheumatoid arthritis || id:finngen_R11_M13_RHEUMA	LDLRAP1++ARH_NA_ARH	Inverse variance weighted	2	0.0791341	0.134961	0.557642	-0.18539	0.343658	1.08235	0.83078	1.4101	0.990373
LDLRAP1	finngen_R11_M13_RHEUMA	Rheumatoid arthritis || id:finngen_R11_M13_RHEUMA	LDLRAP1++ARH_NA_ARH	Maximum likelihood	2	0.0797066	0.121606	0.512179	-0.158642	0.318055	1.08297	0.853302	1.37445	0.9072
ALDOB	finngen_R11_M13_RHEUMA	Rheumatoid arthritis || id:finngen_R11_M13_RHEUMA	ALDOB++ALDOB_NA_ALDOB	Inverse variance weighted	2	0.00916193	0.0355482	0.796613	-0.0605126	0.0788365	1.0092	0.941282	1.08203	0.990373
ALDOB	finngen_R11_M13_RHEUMA	Rheumatoid arthritis || id:finngen_R11_M13_RHEUMA	ALDOB++ALDOB_NA_ALDOB	Maximum likelihood	2	0.00918082	0.0356233	0.796623	-0.0606408	0.0790025	1.00922	0.941161	1.08221	0.967054
GATM	finngen_R11_M13_RHEUMA	Rheumatoid arthritis || id:finngen_R11_M13_RHEUMA	GATM++GATM_NA_GATM	Wald ratio	1	0.0206065	0.0729602	0.77761	-0.122396	0.163609	1.02082	0.884798	1.17775	0.94274
CKMT2	finngen_R11_M13_RHEUMA	Rheumatoid arthritis || id:finngen_R11_M13_RHEUMA	CKMT2++KCRS_NA_KCRS	Wald ratio	1	-0.131297	0.223987	0.557752	-0.570311	0.307717	0.876957	0.565349	1.36032	0.882579
HBQ1	finngen_R11_M13_RHEUMA	Rheumatoid arthritis || id:finngen_R11_M13_RHEUMA	HBQ1++HBAT_NA_HBAT	Wald ratio	1	-0.404889	0.167042	0.0153558	-0.732291	-0.0774869	0.667051	0.480806	0.925439	0.225084
ADH6	finngen_R11_M13_RHEUMA	Rheumatoid arthritis || id:finngen_R11_M13_RHEUMA	ADH6++ADH6_NA_ADH6	Inverse variance weighted	3	0.0323936	0.0885401	0.714467	-0.141145	0.205932	1.03292	0.868363	1.22867	0.990373
ADH6	finngen_R11_M13_RHEUMA	Rheumatoid arthritis || id:finngen_R11_M13_RHEUMA	ADH6++ADH6_NA_ADH6	MR Egger	3	0.256782	0.169327	0.371128	-0.075098	0.588662	1.29276	0.927653	1.80158	0.999671
ADH6	finngen_R11_M13_RHEUMA	Rheumatoid arthritis || id:finngen_R11_M13_RHEUMA	ADH6++ADH6_NA_ADH6	Weighted median	3	0.0670618	0.0807695	0.406376	-0.0912463	0.22537	1.06936	0.912793	1.25279	0.88643
ADH6	finngen_R11_M13_RHEUMA	Rheumatoid arthritis || id:finngen_R11_M13_RHEUMA	ADH6++ADH6_NA_ADH6	Weighted mode	3	0.0712717	0.0917229	0.518455	-0.108505	0.251049	1.07387	0.897174	1.28537	0.976532
ADH6	finngen_R11_M13_RHEUMA	Rheumatoid arthritis || id:finngen_R11_M13_RHEUMA	ADH6++ADH6_NA_ADH6	Maximum likelihood	3	0.0325143	0.0775188	0.674896	-0.119422	0.184451	1.03305	0.887433	1.20256	0.93286
ADH6	finngen_R11_M13_RHEUMA	Rheumatoid arthritis || id:finngen_R11_M13_RHEUMA	ADH6++ADH6_NA_ADH6	Simple mode	3	0.0886779	0.103327	0.481199	-0.113842	0.291198	1.09273	0.892399	1.33803	0.994896
GCLM	finngen_R11_M13_RHEUMA	Rheumatoid arthritis || id:finngen_R11_M13_RHEUMA	GCLM++GSH0_NA_GSH0	Inverse variance weighted	2	0.0865777	0.116768	0.458422	-0.142289	0.315444	1.09044	0.867371	1.37087	0.990373
GCLM	finngen_R11_M13_RHEUMA	Rheumatoid arthritis || id:finngen_R11_M13_RHEUMA	GCLM++GSH0_NA_GSH0	Maximum likelihood	2	0.0865839	0.116953	0.4591	-0.142644	0.315812	1.09044	0.867062	1.37137	0.895805
THG1L	finngen_R11_M13_RHEUMA	Rheumatoid arthritis || id:finngen_R11_M13_RHEUMA	THG1L++THG1_NA_THG1	Inverse variance weighted	2	0.0146284	0.0455139	0.747903	-0.0745788	0.103836	1.01474	0.928134	1.10942	0.990373
THG1L	finngen_R11_M13_RHEUMA	Rheumatoid arthritis || id:finngen_R11_M13_RHEUMA	THG1L++THG1_NA_THG1	Maximum likelihood	2	0.0146313	0.0348484	0.674592	-0.0536717	0.0829342	1.01474	0.947743	1.08647	0.93286
IL11RA	finngen_R11_M13_RHEUMA	Rheumatoid arthritis || id:finngen_R11_M13_RHEUMA	IL11RA++IL_11_RA	Inverse variance weighted	2	0.022229	0.0783783	0.776708	-0.131392	0.175851	1.02248	0.876874	1.19226	0.990373
IL11RA	finngen_R11_M13_RHEUMA	Rheumatoid arthritis || id:finngen_R11_M13_RHEUMA	IL11RA++IL_11_RA	Maximum likelihood	2	0.022237	0.037739	0.555705	-0.0517313	0.0962054	1.02249	0.949584	1.10099	0.92239
CNRIP1	finngen_R11_M13_RHEUMA	Rheumatoid arthritis || id:finngen_R11_M13_RHEUMA	CNRIP1++CB032_NA_CB032	Inverse variance weighted	8	0.0199405	0.0288047	0.488771	-0.0365168	0.0763978	1.02014	0.964142	1.07939	0.990373
CNRIP1	finngen_R11_M13_RHEUMA	Rheumatoid arthritis || id:finngen_R11_M13_RHEUMA	CNRIP1++CB032_NA_CB032	MR Egger	8	0.00987593	0.0423533	0.823373	-0.0731365	0.0928884	1.00992	0.929474	1.09734	0.999671
CNRIP1	finngen_R11_M13_RHEUMA	Rheumatoid arthritis || id:finngen_R11_M13_RHEUMA	CNRIP1++CB032_NA_CB032	Weighted median	8	0.0255417	0.0312406	0.413595	-0.0356897	0.0867732	1.02587	0.96494	1.09065	0.88643
CNRIP1	finngen_R11_M13_RHEUMA	Rheumatoid arthritis || id:finngen_R11_M13_RHEUMA	CNRIP1++CB032_NA_CB032	Weighted mode	8	0.0289988	0.0325764	0.402926	-0.0348509	0.0928484	1.02942	0.965749	1.0973	0.976532
CNRIP1	finngen_R11_M13_RHEUMA	Rheumatoid arthritis || id:finngen_R11_M13_RHEUMA	CNRIP1++CB032_NA_CB032	Maximum likelihood	8	0.0197635	0.0288263	0.492961	-0.036736	0.076263	1.01996	0.963931	1.07925	0.9072
CNRIP1	finngen_R11_M13_RHEUMA	Rheumatoid arthritis || id:finngen_R11_M13_RHEUMA	CNRIP1++CB032_NA_CB032	Simple mode	8	0.057308	0.0707218	0.444422	-0.0813067	0.195923	1.05898	0.921911	1.21643	0.994896
SRA1	finngen_R11_M13_RHEUMA	Rheumatoid arthritis || id:finngen_R11_M13_RHEUMA	SRA1++SRA1_NA_SRA1	Inverse variance weighted	2	0.0173513	0.105891	0.869842	-0.190195	0.224898	1.0175	0.826798	1.25219	0.992378
SRA1	finngen_R11_M13_RHEUMA	Rheumatoid arthritis || id:finngen_R11_M13_RHEUMA	SRA1++SRA1_NA_SRA1	Maximum likelihood	2	0.0173837	0.105972	0.869699	-0.190321	0.225088	1.01754	0.826694	1.25243	0.975865
SH3GLB2	finngen_R11_M13_RHEUMA	Rheumatoid arthritis || id:finngen_R11_M13_RHEUMA	SH3GLB2++SHLB2_NA_SHLB2	Inverse variance weighted	3	-0.0281473	0.0395227	0.476353	-0.105612	0.0493172	0.972245	0.899774	1.05055	0.990373
SH3GLB2	finngen_R11_M13_RHEUMA	Rheumatoid arthritis || id:finngen_R11_M13_RHEUMA	SH3GLB2++SHLB2_NA_SHLB2	MR Egger	3	-0.0723447	0.0669641	0.475424	-0.203594	0.058905	0.93021	0.815793	1.06067	0.999671
SH3GLB2	finngen_R11_M13_RHEUMA	Rheumatoid arthritis || id:finngen_R11_M13_RHEUMA	SH3GLB2++SHLB2_NA_SHLB2	Weighted median	3	-0.0342319	0.0364451	0.347591	-0.105664	0.0372005	0.966347	0.899727	1.0379	0.88643
SH3GLB2	finngen_R11_M13_RHEUMA	Rheumatoid arthritis || id:finngen_R11_M13_RHEUMA	SH3GLB2++SHLB2_NA_SHLB2	Weighted mode	3	-0.0341381	0.0358422	0.441389	-0.104389	0.0361126	0.966438	0.900875	1.03677	0.976532
SH3GLB2	finngen_R11_M13_RHEUMA	Rheumatoid arthritis || id:finngen_R11_M13_RHEUMA	SH3GLB2++SHLB2_NA_SHLB2	Maximum likelihood	3	-0.0281913	0.0356543	0.429128	-0.0980737	0.0416911	0.972202	0.906582	1.04257	0.891932
SH3GLB2	finngen_R11_M13_RHEUMA	Rheumatoid arthritis || id:finngen_R11_M13_RHEUMA	SH3GLB2++SHLB2_NA_SHLB2	Simple mode	3	-0.0756144	0.084792	0.466616	-0.241807	0.0905779	0.927174	0.785208	1.09481	0.994896
HEBP1	finngen_R11_M13_RHEUMA	Rheumatoid arthritis || id:finngen_R11_M13_RHEUMA	HEBP1++HEBP1_NA_HEBP1	Inverse variance weighted	5	0.0666466	0.0301116	0.0268755	0.00762793	0.125665	1.06892	1.00766	1.1339	0.528079
HEBP1	finngen_R11_M13_RHEUMA	Rheumatoid arthritis || id:finngen_R11_M13_RHEUMA	HEBP1++HEBP1_NA_HEBP1	MR Egger	5	0.0509081	0.0461828	0.350819	-0.0396101	0.141426	1.05223	0.961164	1.15192	0.999671
HEBP1	finngen_R11_M13_RHEUMA	Rheumatoid arthritis || id:finngen_R11_M13_RHEUMA	HEBP1++HEBP1_NA_HEBP1	Weighted median	5	0.0657654	0.0271263	0.0153332	0.0125978	0.118933	1.06798	1.01268	1.12629	0.38157
HEBP1	finngen_R11_M13_RHEUMA	Rheumatoid arthritis || id:finngen_R11_M13_RHEUMA	HEBP1++HEBP1_NA_HEBP1	Weighted mode	5	0.0598856	0.0298121	0.11496	0.00145398	0.118317	1.06172	1.00146	1.1256	0.976532
HEBP1	finngen_R11_M13_RHEUMA	Rheumatoid arthritis || id:finngen_R11_M13_RHEUMA	HEBP1++HEBP1_NA_HEBP1	Maximum likelihood	5	0.0666783	0.0256302	0.0092804	0.016443	0.116914	1.06895	1.01658	1.12402	0.241722
HEBP1	finngen_R11_M13_RHEUMA	Rheumatoid arthritis || id:finngen_R11_M13_RHEUMA	HEBP1++HEBP1_NA_HEBP1	Simple mode	5	0.0779822	0.0425641	0.140882	-0.00544343	0.161408	1.0811	0.994571	1.17516	0.994896
PGP	finngen_R11_M13_RHEUMA	Rheumatoid arthritis || id:finngen_R11_M13_RHEUMA	PGP++PGP_NA_PGP	Inverse variance weighted	6	-0.0962265	0.044126	0.0292041	-0.182713	-0.00973952	0.908258	0.833007	0.990308	0.545143
PGP	finngen_R11_M13_RHEUMA	Rheumatoid arthritis || id:finngen_R11_M13_RHEUMA	PGP++PGP_NA_PGP	MR Egger	6	-0.117875	0.112081	0.352276	-0.337554	0.101804	0.888807	0.713513	1.10717	0.999671
PGP	finngen_R11_M13_RHEUMA	Rheumatoid arthritis || id:finngen_R11_M13_RHEUMA	PGP++PGP_NA_PGP	Weighted median	6	-0.111659	0.0468783	0.0172243	-0.20354	-0.0197773	0.894349	0.815837	0.980417	0.390799
PGP	finngen_R11_M13_RHEUMA	Rheumatoid arthritis || id:finngen_R11_M13_RHEUMA	PGP++PGP_NA_PGP	Weighted mode	6	-0.112523	0.048577	0.0683604	-0.207734	-0.0173124	0.893576	0.812423	0.982837	0.976532
PGP	finngen_R11_M13_RHEUMA	Rheumatoid arthritis || id:finngen_R11_M13_RHEUMA	PGP++PGP_NA_PGP	Maximum likelihood	6	-0.0963383	0.0442516	0.0294763	-0.183071	-0.00960515	0.908157	0.832709	0.990441	0.395282
PGP	finngen_R11_M13_RHEUMA	Rheumatoid arthritis || id:finngen_R11_M13_RHEUMA	PGP++PGP_NA_PGP	Simple mode	6	-0.102464	0.110404	0.395959	-0.318855	0.113927	0.902611	0.726981	1.12067	0.994896
CPOX	finngen_R11_M13_RHEUMA	Rheumatoid arthritis || id:finngen_R11_M13_RHEUMA	CPOX++HEM6_NA_HEM6	Inverse variance weighted	2	0.0311499	0.0729537	0.669393	-0.111839	0.174139	1.03164	0.894188	1.19022	0.990373
CPOX	finngen_R11_M13_RHEUMA	Rheumatoid arthritis || id:finngen_R11_M13_RHEUMA	CPOX++HEM6_NA_HEM6	Maximum likelihood	2	0.0311839	0.0730081	0.669285	-0.111912	0.17428	1.03168	0.894123	1.19039	0.93286
CMPK1	finngen_R11_M13_RHEUMA	Rheumatoid arthritis || id:finngen_R11_M13_RHEUMA	CMPK1++Cytidylate_kinase	Wald ratio	1	-0.197905	0.152615	0.194712	-0.49703	0.101219	0.820448	0.608335	1.10652	0.689428
ANXA7	finngen_R11_M13_RHEUMA	Rheumatoid arthritis || id:finngen_R11_M13_RHEUMA	ANXA7++ANXA7_NA_ANXA7	Inverse variance weighted	2	0.0914578	0.128757	0.477512	-0.160907	0.343822	1.09577	0.851371	1.41033	0.990373
ANXA7	finngen_R11_M13_RHEUMA	Rheumatoid arthritis || id:finngen_R11_M13_RHEUMA	ANXA7++ANXA7_NA_ANXA7	Maximum likelihood	2	0.0914876	0.128873	0.477763	-0.161104	0.344079	1.0958	0.851204	1.41069	0.9072
DTD2	finngen_R11_M13_RHEUMA	Rheumatoid arthritis || id:finngen_R11_M13_RHEUMA	DTD2++DTD2_NA_DTD2	Inverse variance weighted	2	-0.0260267	0.102174	0.798933	-0.226288	0.174235	0.974309	0.797488	1.19033	0.990373
DTD2	finngen_R11_M13_RHEUMA	Rheumatoid arthritis || id:finngen_R11_M13_RHEUMA	DTD2++DTD2_NA_DTD2	Maximum likelihood	2	-0.0261781	0.102567	0.798545	-0.227209	0.174853	0.974162	0.796754	1.19107	0.967054
CCL15	finngen_R11_M13_RHEUMA	Rheumatoid arthritis || id:finngen_R11_M13_RHEUMA	CCL15++MIP_5	Inverse variance weighted	4	0.00347389	0.012956	0.7886	-0.02192	0.0288677	1.00348	0.978319	1.02929	0.990373
CCL15	finngen_R11_M13_RHEUMA	Rheumatoid arthritis || id:finngen_R11_M13_RHEUMA	CCL15++MIP_5	MR Egger	4	0.0203293	0.0277607	0.540173	-0.0340816	0.0747402	1.02054	0.966493	1.0776	0.999671
CCL15	finngen_R11_M13_RHEUMA	Rheumatoid arthritis || id:finngen_R11_M13_RHEUMA	CCL15++MIP_5	Weighted median	4	0.00384857	0.0134284	0.774418	-0.022471	0.0301682	1.00386	0.97778	1.03063	0.982685
CCL15	finngen_R11_M13_RHEUMA	Rheumatoid arthritis || id:finngen_R11_M13_RHEUMA	CCL15++MIP_5	Weighted mode	4	0.00307968	0.0135604	0.834935	-0.0234986	0.029658	1.00308	0.976775	1.0301	0.984041
CCL15	finngen_R11_M13_RHEUMA	Rheumatoid arthritis || id:finngen_R11_M13_RHEUMA	CCL15++MIP_5	Maximum likelihood	4	0.00347291	0.0129571	0.788675	-0.021923	0.0288688	1.00348	0.978316	1.02929	0.963748
CCL15	finngen_R11_M13_RHEUMA	Rheumatoid arthritis || id:finngen_R11_M13_RHEUMA	CCL15++MIP_5	Simple mode	4	0.00235887	0.0200588	0.913818	-0.0369564	0.0416742	1.00236	0.963718	1.04255	0.994896
GRHPR	finngen_R11_M13_RHEUMA	Rheumatoid arthritis || id:finngen_R11_M13_RHEUMA	GRHPR++GRHPR_NA_GRHPR	Wald ratio	1	0.0699765	0.308934	0.820805	-0.535534	0.675487	1.07248	0.585357	1.96499	0.944479
PPA2	finngen_R11_M13_RHEUMA	Rheumatoid arthritis || id:finngen_R11_M13_RHEUMA	PPA2++PPase_2	Wald ratio	1	-0.568451	0.142398	6.55189e-05	-0.84755	-0.289351	0.566402	0.428463	0.748749	0.036494
NDRG3	finngen_R11_M13_RHEUMA	Rheumatoid arthritis || id:finngen_R11_M13_RHEUMA	NDRG3++NDRG3_NA_NDRG3	Inverse variance weighted	2	-0.457619	0.327923	0.162863	-1.10035	0.18511	0.632789	0.332755	1.20335	0.881192
NDRG3	finngen_R11_M13_RHEUMA	Rheumatoid arthritis || id:finngen_R11_M13_RHEUMA	NDRG3++NDRG3_NA_NDRG3	Maximum likelihood	2	-0.464391	0.18836	0.0136842	-0.833575	-0.0952058	0.628518	0.434493	0.909186	0.28561
ASRGL1	finngen_R11_M13_RHEUMA	Rheumatoid arthritis || id:finngen_R11_M13_RHEUMA	ASRGL1++Asparaginase_like_protein_1	Inverse variance weighted	2	0.011842	0.0606347	0.845158	-0.107002	0.130686	1.01191	0.898524	1.13961	0.992378
ASRGL1	finngen_R11_M13_RHEUMA	Rheumatoid arthritis || id:finngen_R11_M13_RHEUMA	ASRGL1++Asparaginase_like_protein_1	Maximum likelihood	2	0.0118428	0.0606491	0.845183	-0.107029	0.130715	1.01191	0.898499	1.13964	0.975865
PDHX	finngen_R11_M13_RHEUMA	Rheumatoid arthritis || id:finngen_R11_M13_RHEUMA	PDHX++ODPX_NA_ODPX	Inverse variance weighted	2	-0.0313669	0.114501	0.784126	-0.255788	0.193054	0.96912	0.774306	1.21295	0.990373
PDHX	finngen_R11_M13_RHEUMA	Rheumatoid arthritis || id:finngen_R11_M13_RHEUMA	PDHX++ODPX_NA_ODPX	Maximum likelihood	2	-0.0314001	0.11453	0.783957	-0.255878	0.193078	0.969088	0.774236	1.21298	0.963099
MTHFD2	finngen_R11_M13_RHEUMA	Rheumatoid arthritis || id:finngen_R11_M13_RHEUMA	MTHFD2++MTDC_NA_MTDC	Inverse variance weighted	2	0.0161985	0.115225	0.888201	-0.209642	0.242039	1.01633	0.810874	1.27384	0.992378
MTHFD2	finngen_R11_M13_RHEUMA	Rheumatoid arthritis || id:finngen_R11_M13_RHEUMA	MTHFD2++MTDC_NA_MTDC	Maximum likelihood	2	0.0164119	0.083854	0.844829	-0.147942	0.180766	1.01655	0.862481	1.19813	0.975865
PGM2	finngen_R11_M13_RHEUMA	Rheumatoid arthritis || id:finngen_R11_M13_RHEUMA	PGM2++PGM2_NA_PGM2	Inverse variance weighted	3	0.0708585	0.0508777	0.163704	-0.0288618	0.170579	1.07343	0.971551	1.18599	0.881267
PGM2	finngen_R11_M13_RHEUMA	Rheumatoid arthritis || id:finngen_R11_M13_RHEUMA	PGM2++PGM2_NA_PGM2	MR Egger	3	0.0149956	0.0565714	0.835042	-0.0958844	0.125876	1.01511	0.908569	1.13414	0.999671
PGM2	finngen_R11_M13_RHEUMA	Rheumatoid arthritis || id:finngen_R11_M13_RHEUMA	PGM2++PGM2_NA_PGM2	Weighted median	3	0.0589407	0.0460612	0.20068	-0.0313393	0.149221	1.06071	0.969147	1.16093	0.834332
PGM2	finngen_R11_M13_RHEUMA	Rheumatoid arthritis || id:finngen_R11_M13_RHEUMA	PGM2++PGM2_NA_PGM2	Weighted mode	3	0.0581203	0.0490051	0.357422	-0.0379297	0.15417	1.05984	0.962781	1.16669	0.976532
PGM2	finngen_R11_M13_RHEUMA	Rheumatoid arthritis || id:finngen_R11_M13_RHEUMA	PGM2++PGM2_NA_PGM2	Maximum likelihood	3	0.0709897	0.0436879	0.104178	-0.0146386	0.156618	1.07357	0.985468	1.16955	0.613211
PGM2	finngen_R11_M13_RHEUMA	Rheumatoid arthritis || id:finngen_R11_M13_RHEUMA	PGM2++PGM2_NA_PGM2	Simple mode	3	0.0448028	0.0529918	0.48687	-0.059061	0.148667	1.04582	0.942649	1.16029	0.994896
CPLX1	finngen_R11_M13_RHEUMA	Rheumatoid arthritis || id:finngen_R11_M13_RHEUMA	CPLX1++CPLX1_NA_CPLX1	Wald ratio	1	0.556662	0.235363	0.018024	0.0953511	1.01797	1.74484	1.10005	2.76758	0.250985
GMDS	finngen_R11_M13_RHEUMA	Rheumatoid arthritis || id:finngen_R11_M13_RHEUMA	GMDS++GMDS_NA_GMDS	Wald ratio	1	-0.448358	0.264107	0.0895764	-0.966008	0.0692921	0.638676	0.380599	1.07175	0.541774
IDH1	finngen_R11_M13_RHEUMA	Rheumatoid arthritis || id:finngen_R11_M13_RHEUMA	IDH1++IDH_NA_IDH	Inverse variance weighted	3	-0.0671714	0.0300483	0.0253878	-0.126066	-0.00827679	0.935035	0.881557	0.991757	0.526563
IDH1	finngen_R11_M13_RHEUMA	Rheumatoid arthritis || id:finngen_R11_M13_RHEUMA	IDH1++IDH_NA_IDH	MR Egger	3	-0.0347228	0.0635689	0.681729	-0.159318	0.0898722	0.965873	0.852725	1.09403	0.999671
IDH1	finngen_R11_M13_RHEUMA	Rheumatoid arthritis || id:finngen_R11_M13_RHEUMA	IDH1++IDH_NA_IDH	Weighted median	3	-0.0667354	0.0300289	0.0262584	-0.125592	-0.00787864	0.935443	0.881975	0.992152	0.441035
IDH1	finngen_R11_M13_RHEUMA	Rheumatoid arthritis || id:finngen_R11_M13_RHEUMA	IDH1++IDH_NA_IDH	Weighted mode	3	-0.0612958	0.031296	0.189258	-0.122636	4.43496e-05	0.940545	0.884586	1.00004	0.976532
IDH1	finngen_R11_M13_RHEUMA	Rheumatoid arthritis || id:finngen_R11_M13_RHEUMA	IDH1++IDH_NA_IDH	Maximum likelihood	3	-0.0672214	0.030205	0.0260471	-0.126423	-0.00801969	0.934988	0.881242	0.992012	0.377989
IDH1	finngen_R11_M13_RHEUMA	Rheumatoid arthritis || id:finngen_R11_M13_RHEUMA	IDH1++IDH_NA_IDH	Simple mode	3	-0.116965	0.0538088	0.161784	-0.222431	-0.0115002	0.889616	0.800571	0.988566	0.994896
PSMB4	finngen_R11_M13_RHEUMA	Rheumatoid arthritis || id:finngen_R11_M13_RHEUMA	PSMB4++Proteasome_beta_chain	Inverse variance weighted	4	0.0501763	0.0247554	0.0426746	0.00165567	0.0986969	1.05146	1.00166	1.10373	0.682376
PSMB4	finngen_R11_M13_RHEUMA	Rheumatoid arthritis || id:finngen_R11_M13_RHEUMA	PSMB4++Proteasome_beta_chain	MR Egger	4	0.0401127	0.0636562	0.592995	-0.0846534	0.164879	1.04093	0.918831	1.17925	0.999671
PSMB4	finngen_R11_M13_RHEUMA	Rheumatoid arthritis || id:finngen_R11_M13_RHEUMA	PSMB4++Proteasome_beta_chain	Weighted median	4	0.0471596	0.024265	0.0519535	-0.000399916	0.094719	1.04829	0.9996	1.09935	0.555824
PSMB4	finngen_R11_M13_RHEUMA	Rheumatoid arthritis || id:finngen_R11_M13_RHEUMA	PSMB4++Proteasome_beta_chain	Weighted mode	4	0.0457767	0.027051	0.189177	-0.00724321	0.0987967	1.04684	0.992783	1.10384	0.976532
PSMB4	finngen_R11_M13_RHEUMA	Rheumatoid arthritis || id:finngen_R11_M13_RHEUMA	PSMB4++Proteasome_beta_chain	Maximum likelihood	4	0.0501825	0.0247678	0.0427529	0.00163754	0.0987274	1.05146	1.00164	1.10377	0.498898
PSMB4	finngen_R11_M13_RHEUMA	Rheumatoid arthritis || id:finngen_R11_M13_RHEUMA	PSMB4++Proteasome_beta_chain	Simple mode	4	0.102875	0.0550755	0.158584	-0.00507288	0.210823	1.10835	0.99494	1.23469	0.994896
PSAT1	finngen_R11_M13_RHEUMA	Rheumatoid arthritis || id:finngen_R11_M13_RHEUMA	PSAT1++SERC_NA_SERC	Inverse variance weighted	2	0.0830031	0.0971887	0.393083	-0.107487	0.273493	1.08655	0.898088	1.31455	0.990373
PSAT1	finngen_R11_M13_RHEUMA	Rheumatoid arthritis || id:finngen_R11_M13_RHEUMA	PSAT1++SERC_NA_SERC	Maximum likelihood	2	0.0830057	0.0973224	0.393718	-0.107746	0.273758	1.08655	0.897855	1.3149	0.890655
ALB	finngen_R11_M13_RHEUMA	Rheumatoid arthritis || id:finngen_R11_M13_RHEUMA	ALB++Albumin_NA_Albumin	Wald ratio	1	-0.367039	0.178495	0.0397534	-0.716889	-0.0171895	0.692783	0.488269	0.982957	0.381769
ALDH2	finngen_R11_M13_RHEUMA	Rheumatoid arthritis || id:finngen_R11_M13_RHEUMA	ALDH2++ALDH_E2	Wald ratio	1	0.437683	0.164974	0.00797681	0.114335	0.761032	1.54911	1.12113	2.14048	0.193536
COMT	finngen_R11_M13_RHEUMA	Rheumatoid arthritis || id:finngen_R11_M13_RHEUMA	COMT++Catechol_O_methyltransferase	Wald ratio	1	0.0840409	0.149964	0.575201	-0.209888	0.377969	1.08767	0.810675	1.45932	0.885657
GLRX	finngen_R11_M13_RHEUMA	Rheumatoid arthritis || id:finngen_R11_M13_RHEUMA	GLRX++GLRX1_NA_GLRX1	Wald ratio	1	-0.0192607	0.188069	0.918429	-0.387875	0.349354	0.980924	0.678497	1.41815	0.970711
ST13	finngen_R11_M13_RHEUMA	Rheumatoid arthritis || id:finngen_R11_M13_RHEUMA	ST13++suppression_of_tumorigenicity_13	Wald ratio	1	-0.55308	0.2372	0.0197165	-1.01799	-0.0881674	0.575175	0.361319	0.915608	0.2609
AKR1D1	finngen_R11_M13_RHEUMA	Rheumatoid arthritis || id:finngen_R11_M13_RHEUMA	AKR1D1++AK1D1_NA_AK1D1	Wald ratio	1	-0.110606	0.26738	0.679119	-0.634672	0.413459	0.895291	0.53011	1.51204	0.920363
ARF4	finngen_R11_M13_RHEUMA	Rheumatoid arthritis || id:finngen_R11_M13_RHEUMA	ARF4++ARF4_NA_ARF4	Inverse variance weighted	2	0.0866907	0.132885	0.514159	-0.173763	0.347145	1.09056	0.840496	1.41502	0.990373
ARF4	finngen_R11_M13_RHEUMA	Rheumatoid arthritis || id:finngen_R11_M13_RHEUMA	ARF4++ARF4_NA_ARF4	Maximum likelihood	2	0.08684	0.133183	0.514378	-0.174198	0.347878	1.09072	0.84013	1.41606	0.90868
ARL4D	finngen_R11_M13_RHEUMA	Rheumatoid arthritis || id:finngen_R11_M13_RHEUMA	ARL4D++ARL4D_NA_ARL4D	Wald ratio	1	0.101565	0.244747	0.678157	-0.37814	0.58127	1.1069	0.685135	1.78831	0.920363
MVD	finngen_R11_M13_RHEUMA	Rheumatoid arthritis || id:finngen_R11_M13_RHEUMA	MVD++ERG19_NA_ERG19	Wald ratio	1	-0.291917	0.582657	0.616364	-1.43392	0.850091	0.746831	0.238372	2.33986	0.887119
RALB	finngen_R11_M13_RHEUMA	Rheumatoid arthritis || id:finngen_R11_M13_RHEUMA	RALB++RALB_NA_RALB	Wald ratio	1	-0.0191087	0.0520291	0.713418	-0.121086	0.0828684	0.981073	0.885958	1.0864	0.930618
UBXN2B	finngen_R11_M13_RHEUMA	Rheumatoid arthritis || id:finngen_R11_M13_RHEUMA	UBXN2B++UBX2B_NA_UBX2B	Wald ratio	1	0.078752	0.212093	0.710407	-0.33695	0.494454	1.08194	0.713945	1.6396	0.930618
PTGES2	finngen_R11_M13_RHEUMA	Rheumatoid arthritis || id:finngen_R11_M13_RHEUMA	PTGES2++PGES2_NA_PGES2	Wald ratio	1	0.190935	0.205968	0.353922	-0.212763	0.594633	1.21038	0.808347	1.81236	0.777232
DDX19A	finngen_R11_M13_RHEUMA	Rheumatoid arthritis || id:finngen_R11_M13_RHEUMA	DDX19A++DD19A_NA_DD19A	Wald ratio	1	-0.018949	0.274214	0.944908	-0.556409	0.518511	0.981229	0.573264	1.67952	0.981147
PPIC	finngen_R11_M13_RHEUMA	Rheumatoid arthritis || id:finngen_R11_M13_RHEUMA	PPIC++PPIC_NA_PPIC	Inverse variance weighted	4	0.0322319	0.0371726	0.385894	-0.0406264	0.10509	1.03276	0.960188	1.11081	0.990373
PPIC	finngen_R11_M13_RHEUMA	Rheumatoid arthritis || id:finngen_R11_M13_RHEUMA	PPIC++PPIC_NA_PPIC	MR Egger	4	0.0424668	0.0619379	0.563749	-0.0789315	0.163865	1.04338	0.924103	1.17806	0.999671
PPIC	finngen_R11_M13_RHEUMA	Rheumatoid arthritis || id:finngen_R11_M13_RHEUMA	PPIC++PPIC_NA_PPIC	Weighted median	4	0.0449362	0.0378373	0.234984	-0.0292249	0.119097	1.04596	0.971198	1.12648	0.84593
PPIC	finngen_R11_M13_RHEUMA	Rheumatoid arthritis || id:finngen_R11_M13_RHEUMA	PPIC++PPIC_NA_PPIC	Weighted mode	4	0.0457074	0.0410286	0.346482	-0.0347087	0.126123	1.04677	0.965887	1.13442	0.976532
PPIC	finngen_R11_M13_RHEUMA	Rheumatoid arthritis || id:finngen_R11_M13_RHEUMA	PPIC++PPIC_NA_PPIC	Maximum likelihood	4	0.0322476	0.0371861	0.385835	-0.0406371	0.105132	1.03277	0.960178	1.11086	0.888723
PPIC	finngen_R11_M13_RHEUMA	Rheumatoid arthritis || id:finngen_R11_M13_RHEUMA	PPIC++PPIC_NA_PPIC	Simple mode	4	0.0350239	0.0687605	0.645602	-0.0997466	0.169794	1.03564	0.905067	1.18506	0.994896
SAA2	finngen_R11_M13_RHEUMA	Rheumatoid arthritis || id:finngen_R11_M13_RHEUMA	SAA2++SAA2_NA_SAA2	Inverse variance weighted	4	-0.0604513	0.0320262	0.0590855	-0.123223	0.00232009	0.94134	0.884067	1.00232	0.705108
SAA2	finngen_R11_M13_RHEUMA	Rheumatoid arthritis || id:finngen_R11_M13_RHEUMA	SAA2++SAA2_NA_SAA2	MR Egger	4	-0.0698481	0.0454074	0.263835	-0.158847	0.0191504	0.932535	0.853127	1.01933	0.999671
SAA2	finngen_R11_M13_RHEUMA	Rheumatoid arthritis || id:finngen_R11_M13_RHEUMA	SAA2++SAA2_NA_SAA2	Weighted median	4	-0.057194	0.033085	0.083863	-0.122041	0.00765261	0.944411	0.885112	1.00768	0.639067
SAA2	finngen_R11_M13_RHEUMA	Rheumatoid arthritis || id:finngen_R11_M13_RHEUMA	SAA2++SAA2_NA_SAA2	Weighted mode	4	-0.0586346	0.0344375	0.187188	-0.126132	0.00886279	0.943051	0.881498	1.0089	0.976532
SAA2	finngen_R11_M13_RHEUMA	Rheumatoid arthritis || id:finngen_R11_M13_RHEUMA	SAA2++SAA2_NA_SAA2	Maximum likelihood	4	-0.0604893	0.0320602	0.0591955	-0.123327	0.00234877	0.941304	0.883974	1.00235	0.516226
SAA2	finngen_R11_M13_RHEUMA	Rheumatoid arthritis || id:finngen_R11_M13_RHEUMA	SAA2++SAA2_NA_SAA2	Simple mode	4	-0.0586346	0.0585212	0.390201	-0.173336	0.0560669	0.943051	0.840855	1.05767	0.994896
TG	finngen_R11_M13_RHEUMA	Rheumatoid arthritis || id:finngen_R11_M13_RHEUMA	TG++Thyroglobulin_NA_Thyroglobulin	Wald ratio	1	0.393656	0.254534	0.121965	-0.10523	0.892543	1.48239	0.900118	2.44133	0.569588
AIF1L	finngen_R11_M13_RHEUMA	Rheumatoid arthritis || id:finngen_R11_M13_RHEUMA	AIF1L++AIF1L_NA_AIF1L	Inverse variance weighted	5	0.0744077	0.0475817	0.117867	-0.0188524	0.167668	1.07725	0.981324	1.18254	0.819946
AIF1L	finngen_R11_M13_RHEUMA	Rheumatoid arthritis || id:finngen_R11_M13_RHEUMA	AIF1L++AIF1L_NA_AIF1L	MR Egger	5	0.0849973	0.089128	0.410614	-0.0896936	0.259688	1.08871	0.914211	1.29653	0.999671
AIF1L	finngen_R11_M13_RHEUMA	Rheumatoid arthritis || id:finngen_R11_M13_RHEUMA	AIF1L++AIF1L_NA_AIF1L	Weighted median	5	0.085854	0.0362295	0.0178014	0.0148441	0.156864	1.08965	1.01495	1.16984	0.390799
AIF1L	finngen_R11_M13_RHEUMA	Rheumatoid arthritis || id:finngen_R11_M13_RHEUMA	AIF1L++AIF1L_NA_AIF1L	Weighted mode	5	0.0906639	0.0425018	0.0998505	0.00736036	0.173968	1.0949	1.00739	1.19002	0.976532
AIF1L	finngen_R11_M13_RHEUMA	Rheumatoid arthritis || id:finngen_R11_M13_RHEUMA	AIF1L++AIF1L_NA_AIF1L	Maximum likelihood	5	0.0747133	0.032736	0.0224717	0.0105508	0.138876	1.07758	1.01061	1.14898	0.371169
AIF1L	finngen_R11_M13_RHEUMA	Rheumatoid arthritis || id:finngen_R11_M13_RHEUMA	AIF1L++AIF1L_NA_AIF1L	Simple mode	5	0.0849192	0.0821226	0.359529	-0.0760412	0.24588	1.08863	0.926778	1.27875	0.994896
CEACAM8	finngen_R11_M13_RHEUMA	Rheumatoid arthritis || id:finngen_R11_M13_RHEUMA	CEACAM8++CEAM8_NA_CEAM8	Inverse variance weighted	2	-0.0892398	0.145383	0.539331	-0.374191	0.195711	0.914626	0.687846	1.21618	0.990373
CEACAM8	finngen_R11_M13_RHEUMA	Rheumatoid arthritis || id:finngen_R11_M13_RHEUMA	CEACAM8++CEAM8_NA_CEAM8	Maximum likelihood	2	-0.0892948	0.145662	0.539857	-0.374792	0.196202	0.914576	0.687433	1.21677	0.921707
CHST4	finngen_R11_M13_RHEUMA	Rheumatoid arthritis || id:finngen_R11_M13_RHEUMA	CHST4++CHST4_NA_CHST4	Wald ratio	1	0.069908	0.158513	0.659196	-0.240778	0.380594	1.07241	0.786016	1.46315	0.91523
COL3A1	finngen_R11_M13_RHEUMA	Rheumatoid arthritis || id:finngen_R11_M13_RHEUMA	COL3A1++Collagen_Type_III	Wald ratio	1	-0.326311	0.192703	0.0903922	-0.704009	0.0513877	0.721581	0.494598	1.05273	0.541774
DNAJB4	finngen_R11_M13_RHEUMA	Rheumatoid arthritis || id:finngen_R11_M13_RHEUMA	DNAJB4++DNJB4_NA_DNJB4	Inverse variance weighted	3	-0.0773402	0.0709689	0.275812	-0.216439	0.0617588	0.925575	0.805382	1.06371	0.982649
DNAJB4	finngen_R11_M13_RHEUMA	Rheumatoid arthritis || id:finngen_R11_M13_RHEUMA	DNAJB4++DNJB4_NA_DNJB4	MR Egger	3	-0.570878	0.366224	0.363117	-1.28868	0.14692	0.565029	0.275635	1.15826	0.999671
DNAJB4	finngen_R11_M13_RHEUMA	Rheumatoid arthritis || id:finngen_R11_M13_RHEUMA	DNAJB4++DNJB4_NA_DNJB4	Weighted median	3	-0.0778273	0.0746705	0.297284	-0.224182	0.0685269	0.925124	0.79917	1.07093	0.88365
DNAJB4	finngen_R11_M13_RHEUMA	Rheumatoid arthritis || id:finngen_R11_M13_RHEUMA	DNAJB4++DNJB4_NA_DNJB4	Weighted mode	3	-0.0654038	0.0875043	0.532731	-0.236912	0.106105	0.936689	0.789061	1.11194	0.976532
DNAJB4	finngen_R11_M13_RHEUMA	Rheumatoid arthritis || id:finngen_R11_M13_RHEUMA	DNAJB4++DNJB4_NA_DNJB4	Maximum likelihood	3	-0.0776514	0.0711521	0.275122	-0.21711	0.0618068	0.925287	0.804842	1.06376	0.823737
DNAJB4	finngen_R11_M13_RHEUMA	Rheumatoid arthritis || id:finngen_R11_M13_RHEUMA	DNAJB4++DNJB4_NA_DNJB4	Simple mode	3	-0.0408568	0.116548	0.7594	-0.269291	0.187577	0.959967	0.763921	1.20632	0.994896
AMY2A	finngen_R11_M13_RHEUMA	Rheumatoid arthritis || id:finngen_R11_M13_RHEUMA	AMY2A++Pancreatic_alpha_amylase	Inverse variance weighted	6	-0.0130913	0.0231404	0.571577	-0.0584465	0.032264	0.986994	0.943229	1.03279	0.990373
AMY2A	finngen_R11_M13_RHEUMA	Rheumatoid arthritis || id:finngen_R11_M13_RHEUMA	AMY2A++Pancreatic_alpha_amylase	MR Egger	6	-0.0623722	0.0396823	0.191098	-0.140149	0.015405	0.939533	0.869228	1.01552	0.999671
AMY2A	finngen_R11_M13_RHEUMA	Rheumatoid arthritis || id:finngen_R11_M13_RHEUMA	AMY2A++Pancreatic_alpha_amylase	Weighted median	6	-0.0154162	0.0242648	0.525214	-0.0629752	0.0321429	0.984702	0.938967	1.03267	0.917989
AMY2A	finngen_R11_M13_RHEUMA	Rheumatoid arthritis || id:finngen_R11_M13_RHEUMA	AMY2A++Pancreatic_alpha_amylase	Weighted mode	6	-0.0244368	0.0247632	0.369048	-0.0729728	0.0240992	0.975859	0.929626	1.02439	0.976532
AMY2A	finngen_R11_M13_RHEUMA	Rheumatoid arthritis || id:finngen_R11_M13_RHEUMA	AMY2A++Pancreatic_alpha_amylase	Maximum likelihood	6	-0.0131095	0.0231599	0.571365	-0.058503	0.032284	0.986976	0.943175	1.03281	0.924823
AMY2A	finngen_R11_M13_RHEUMA	Rheumatoid arthritis || id:finngen_R11_M13_RHEUMA	AMY2A++Pancreatic_alpha_amylase	Simple mode	6	-0.0359246	0.0487452	0.494237	-0.131465	0.0596161	0.964713	0.87681	1.06143	0.994896
PDE4A	finngen_R11_M13_RHEUMA	Rheumatoid arthritis || id:finngen_R11_M13_RHEUMA	PDE4A++PDE4A_NA_PDE4A	Inverse variance weighted	4	-0.264822	0.0947592	0.00519513	-0.45055	-0.0790935	0.767343	0.637278	0.923954	0.264479
PDE4A	finngen_R11_M13_RHEUMA	Rheumatoid arthritis || id:finngen_R11_M13_RHEUMA	PDE4A++PDE4A_NA_PDE4A	MR Egger	4	-0.00177986	0.205711	0.993882	-0.404973	0.401413	0.998222	0.666995	1.49393	0.999671
PDE4A	finngen_R11_M13_RHEUMA	Rheumatoid arthritis || id:finngen_R11_M13_RHEUMA	PDE4A++PDE4A_NA_PDE4A	Weighted median	4	-0.192416	0.121131	0.112174	-0.429832	0.0450005	0.824964	0.650618	1.04603	0.71668
PDE4A	finngen_R11_M13_RHEUMA	Rheumatoid arthritis || id:finngen_R11_M13_RHEUMA	PDE4A++PDE4A_NA_PDE4A	Weighted mode	4	-0.186581	0.137202	0.267037	-0.455497	0.0823342	0.829791	0.634133	1.08582	0.976532
PDE4A	finngen_R11_M13_RHEUMA	Rheumatoid arthritis || id:finngen_R11_M13_RHEUMA	PDE4A++PDE4A_NA_PDE4A	Maximum likelihood	4	-0.268527	0.0978161	0.00604709	-0.460246	-0.0768069	0.764505	0.631128	0.926069	0.205235
PDE4A	finngen_R11_M13_RHEUMA	Rheumatoid arthritis || id:finngen_R11_M13_RHEUMA	PDE4A++PDE4A_NA_PDE4A	Simple mode	4	-0.194548	0.156866	0.303056	-0.502004	0.112909	0.823207	0.605316	1.11953	0.994896
CD68	finngen_R11_M13_RHEUMA	Rheumatoid arthritis || id:finngen_R11_M13_RHEUMA	CD68++CD68_NA_CD68	Inverse variance weighted	2	-0.323412	0.344444	0.347762	-0.998522	0.351699	0.723676	0.368424	1.42148	0.990373
CD68	finngen_R11_M13_RHEUMA	Rheumatoid arthritis || id:finngen_R11_M13_RHEUMA	CD68++CD68_NA_CD68	Maximum likelihood	2	-0.348727	0.148352	0.0187397	-0.639497	-0.0579566	0.705586	0.527558	0.943691	0.349807
SLIT2	finngen_R11_M13_RHEUMA	Rheumatoid arthritis || id:finngen_R11_M13_RHEUMA	SLIT2++SLIT2_NA_SLIT2	Wald ratio	1	0.150371	0.127753	0.239176	-0.100024	0.400766	1.16227	0.904816	1.49297	0.722258
TGM4	finngen_R11_M13_RHEUMA	Rheumatoid arthritis || id:finngen_R11_M13_RHEUMA	TGM4++TGM4_NA_TGM4	Wald ratio	1	-0.333632	0.241041	0.166319	-0.806073	0.138808	0.716317	0.446609	1.1489	0.648366
TGM2	finngen_R11_M13_RHEUMA	Rheumatoid arthritis || id:finngen_R11_M13_RHEUMA	TGM2++Tissue_transglutaminase	Wald ratio	1	0.0103613	0.210907	0.960818	-0.403016	0.423739	1.01042	0.668301	1.52766	0.984055
SH3BGRL2	finngen_R11_M13_RHEUMA	Rheumatoid arthritis || id:finngen_R11_M13_RHEUMA	SH3BGRL2++SH3L2_NA_SH3L2	Wald ratio	1	0.173699	0.119978	0.147687	-0.061459	0.408856	1.1897	0.940392	1.5051	0.623194
CMBL	finngen_R11_M13_RHEUMA	Rheumatoid arthritis || id:finngen_R11_M13_RHEUMA	CMBL++CMBL_NA_CMBL	Wald ratio	1	-0.258301	0.195015	0.185332	-0.640531	0.123929	0.772363	0.527012	1.13194	0.679143
PPP1R14A	finngen_R11_M13_RHEUMA	Rheumatoid arthritis || id:finngen_R11_M13_RHEUMA	PPP1R14A++PP14A_NA_PP14A	Inverse variance weighted	2	-0.0762568	0.0936428	0.415452	-0.259797	0.107283	0.926578	0.771208	1.11325	0.990373
PPP1R14A	finngen_R11_M13_RHEUMA	Rheumatoid arthritis || id:finngen_R11_M13_RHEUMA	PPP1R14A++PP14A_NA_PP14A	Maximum likelihood	2	-0.076485	0.0602872	0.204557	-0.194648	0.041678	0.926367	0.823124	1.04256	0.775689
UBLCP1	finngen_R11_M13_RHEUMA	Rheumatoid arthritis || id:finngen_R11_M13_RHEUMA	UBLCP1++UBCP1_NA_UBCP1	Inverse variance weighted	4	0.0105041	0.0694465	0.879775	-0.125611	0.146619	1.01056	0.881958	1.15791	0.992378
UBLCP1	finngen_R11_M13_RHEUMA	Rheumatoid arthritis || id:finngen_R11_M13_RHEUMA	UBLCP1++UBCP1_NA_UBCP1	MR Egger	4	0.0578956	0.200254	0.79971	-0.334602	0.450393	1.0596	0.715623	1.56893	0.999671
UBLCP1	finngen_R11_M13_RHEUMA	Rheumatoid arthritis || id:finngen_R11_M13_RHEUMA	UBLCP1++UBCP1_NA_UBCP1	Weighted median	4	0.0622349	0.0814072	0.444576	-0.0973233	0.221793	1.06421	0.907263	1.24831	0.90561
UBLCP1	finngen_R11_M13_RHEUMA	Rheumatoid arthritis || id:finngen_R11_M13_RHEUMA	UBLCP1++UBCP1_NA_UBCP1	Weighted mode	4	0.111868	0.113736	0.39785	-0.111054	0.33479	1.11836	0.89489	1.39765	0.976532
UBLCP1	finngen_R11_M13_RHEUMA	Rheumatoid arthritis || id:finngen_R11_M13_RHEUMA	UBLCP1++UBCP1_NA_UBCP1	Maximum likelihood	4	0.0105487	0.0637461	0.868566	-0.114394	0.135491	1.0106	0.891907	1.1451	0.975865
UBLCP1	finngen_R11_M13_RHEUMA	Rheumatoid arthritis || id:finngen_R11_M13_RHEUMA	UBLCP1++UBCP1_NA_UBCP1	Simple mode	4	0.0917736	0.138277	0.554334	-0.179249	0.362796	1.09612	0.835898	1.43734	0.994896
MTHFSD	finngen_R11_M13_RHEUMA	Rheumatoid arthritis || id:finngen_R11_M13_RHEUMA	MTHFSD++MTHFSD_NA_MTHFSD	Inverse variance weighted	4	-0.032185	0.0393819	0.413783	-0.109373	0.0450035	0.968327	0.896396	1.04603	0.990373
MTHFSD	finngen_R11_M13_RHEUMA	Rheumatoid arthritis || id:finngen_R11_M13_RHEUMA	MTHFSD++MTHFSD_NA_MTHFSD	MR Egger	4	-0.0789541	0.0592382	0.314144	-0.195061	0.0371527	0.924082	0.822784	1.03785	0.999671
MTHFSD	finngen_R11_M13_RHEUMA	Rheumatoid arthritis || id:finngen_R11_M13_RHEUMA	MTHFSD++MTHFSD_NA_MTHFSD	Weighted median	4	-0.0438593	0.0393001	0.264418	-0.120887	0.0331688	0.957089	0.886134	1.03373	0.866995
MTHFSD	finngen_R11_M13_RHEUMA	Rheumatoid arthritis || id:finngen_R11_M13_RHEUMA	MTHFSD++MTHFSD_NA_MTHFSD	Weighted mode	4	-0.0439025	0.042114	0.373812	-0.126446	0.0386409	0.957047	0.881222	1.0394	0.976532
MTHFSD	finngen_R11_M13_RHEUMA	Rheumatoid arthritis || id:finngen_R11_M13_RHEUMA	MTHFSD++MTHFSD_NA_MTHFSD	Maximum likelihood	4	-0.0322304	0.0394165	0.413536	-0.109487	0.045026	0.968283	0.896294	1.04606	0.890655
MTHFSD	finngen_R11_M13_RHEUMA	Rheumatoid arthritis || id:finngen_R11_M13_RHEUMA	MTHFSD++MTHFSD_NA_MTHFSD	Simple mode	4	-0.0298541	0.0941629	0.771991	-0.214413	0.154705	0.970587	0.807015	1.16731	0.994896
ALDH6A1	finngen_R11_M13_RHEUMA	Rheumatoid arthritis || id:finngen_R11_M13_RHEUMA	ALDH6A1++MMSA_NA_MMSA	Inverse variance weighted	2	-0.0956849	0.137584	0.486763	-0.365349	0.173979	0.90875	0.693954	1.19003	0.990373
ALDH6A1	finngen_R11_M13_RHEUMA	Rheumatoid arthritis || id:finngen_R11_M13_RHEUMA	ALDH6A1++MMSA_NA_MMSA	Maximum likelihood	2	-0.0958707	0.138061	0.487428	-0.366471	0.17473	0.908582	0.693176	1.19092	0.9072
PRPSAP2	finngen_R11_M13_RHEUMA	Rheumatoid arthritis || id:finngen_R11_M13_RHEUMA	PRPSAP2++KPRB_NA_KPRB	Wald ratio	1	-0.0838036	0.212441	0.693227	-0.500187	0.33258	0.919612	0.606417	1.39456	0.921545
MPPED2	finngen_R11_M13_RHEUMA	Rheumatoid arthritis || id:finngen_R11_M13_RHEUMA	MPPED2++MPPD2_NA_MPPD2	Inverse variance weighted	2	0.0902762	0.138088	0.513268	-0.180377	0.360929	1.09448	0.834955	1.43466	0.990373
MPPED2	finngen_R11_M13_RHEUMA	Rheumatoid arthritis || id:finngen_R11_M13_RHEUMA	MPPED2++MPPD2_NA_MPPD2	Maximum likelihood	2	0.0909352	0.104609	0.384689	-0.114098	0.295968	1.0952	0.892171	1.34443	0.888354
USP15	finngen_R11_M13_RHEUMA	Rheumatoid arthritis || id:finngen_R11_M13_RHEUMA	USP15++UBP15_NA_UBP15	Inverse variance weighted	2	-0.125938	0.106468	0.236859	-0.334616	0.0827392	0.881669	0.715613	1.08626	0.950833
USP15	finngen_R11_M13_RHEUMA	Rheumatoid arthritis || id:finngen_R11_M13_RHEUMA	USP15++UBP15_NA_UBP15	Maximum likelihood	2	-0.12599	0.106777	0.238026	-0.335274	0.0832935	0.881623	0.715142	1.08686	0.7864
STAMBP	finngen_R11_M13_RHEUMA	Rheumatoid arthritis || id:finngen_R11_M13_RHEUMA	STAMBP++STABP_NA_STABP	Inverse variance weighted	2	-0.571744	0.248081	0.0211853	-1.05798	-0.0855051	0.56454	0.347155	0.918048	0.494324
STAMBP	finngen_R11_M13_RHEUMA	Rheumatoid arthritis || id:finngen_R11_M13_RHEUMA	STAMBP++STABP_NA_STABP	Maximum likelihood	2	-0.571902	0.255285	0.025075	-1.07226	-0.0715424	0.564451	0.342234	0.930957	0.37502
NAP1L4	finngen_R11_M13_RHEUMA	Rheumatoid arthritis || id:finngen_R11_M13_RHEUMA	NAP1L4++NAP2L_NA_NAP2L	Wald ratio	1	-0.119022	0.0811636	0.142528	-0.278102	0.040059	0.887789	0.757219	1.04087	0.615412
DTD1	finngen_R11_M13_RHEUMA	Rheumatoid arthritis || id:finngen_R11_M13_RHEUMA	DTD1++Histidyl_tRNA_synthetase_related	Wald ratio	1	0.0083985	0.0647172	0.896747	-0.118447	0.135244	1.00843	0.888299	1.14482	0.959083
ACAT1	finngen_R11_M13_RHEUMA	Rheumatoid arthritis || id:finngen_R11_M13_RHEUMA	ACAT1++THIL_NA_THIL	Wald ratio	1	0.167646	0.144224	0.245075	-0.115034	0.450325	1.18252	0.891336	1.56882	0.722258
NUDT1	finngen_R11_M13_RHEUMA	Rheumatoid arthritis || id:finngen_R11_M13_RHEUMA	NUDT1++8ODP_NA_8ODP	Wald ratio	1	-0.0192899	0.0804848	0.810585	-0.17704	0.13846	0.980895	0.837746	1.1485	0.944479
ADK	finngen_R11_M13_RHEUMA	Rheumatoid arthritis || id:finngen_R11_M13_RHEUMA	ADK++ADK_NA_ADK	Wald ratio	1	-0.0994296	0.233684	0.670482	-0.557451	0.358592	0.905354	0.572667	1.43131	0.917588
SPINK4	finngen_R11_M13_RHEUMA	Rheumatoid arthritis || id:finngen_R11_M13_RHEUMA	SPINK4++ISK4_NA_ISK4	Inverse variance weighted	2	-0.03097	0.0606579	0.609653	-0.14986	0.0879195	0.969505	0.860829	1.0919	0.990373
SPINK4	finngen_R11_M13_RHEUMA	Rheumatoid arthritis || id:finngen_R11_M13_RHEUMA	SPINK4++ISK4_NA_ISK4	Maximum likelihood	2	-0.031	0.0606998	0.609554	-0.149972	0.0879716	0.969476	0.860732	1.09196	0.929591
RAB1A	finngen_R11_M13_RHEUMA	Rheumatoid arthritis || id:finngen_R11_M13_RHEUMA	RAB1A++RAB1A_NA_RAB1A	Wald ratio	1	0.101259	0.223163	0.650014	-0.336141	0.538658	1.10656	0.714522	1.71371	0.907413
SUB1	finngen_R11_M13_RHEUMA	Rheumatoid arthritis || id:finngen_R11_M13_RHEUMA	SUB1++TCP4_NA_TCP4	Wald ratio	1	-0.543945	0.22722	0.0166698	-0.989297	-0.0985934	0.580454	0.371838	0.906111	0.238079
DDT	finngen_R11_M13_RHEUMA	Rheumatoid arthritis || id:finngen_R11_M13_RHEUMA	DDT++D_dopachrome_decarboxylase	Wald ratio	1	0.0565789	0.115399	0.623928	-0.169603	0.28276	1.05821	0.844	1.32679	0.892288
RBP5	finngen_R11_M13_RHEUMA	Rheumatoid arthritis || id:finngen_R11_M13_RHEUMA	RBP5++RBP_III	Wald ratio	1	-0.348429	0.247103	0.158522	-0.83275	0.135892	0.705796	0.434852	1.14556	0.644801
SRGN	finngen_R11_M13_RHEUMA	Rheumatoid arthritis || id:finngen_R11_M13_RHEUMA	SRGN++Platelet_proteoglycan	Inverse variance weighted	5	-0.00629251	0.0446834	0.888009	-0.0938719	0.0812869	0.993727	0.910399	1.08468	0.992378
SRGN	finngen_R11_M13_RHEUMA	Rheumatoid arthritis || id:finngen_R11_M13_RHEUMA	SRGN++Platelet_proteoglycan	MR Egger	5	-0.0627424	0.0510973	0.307039	-0.162893	0.0374083	0.939185	0.849682	1.03812	0.999671
SRGN	finngen_R11_M13_RHEUMA	Rheumatoid arthritis || id:finngen_R11_M13_RHEUMA	SRGN++Platelet_proteoglycan	Weighted median	5	-0.0195234	0.0445084	0.660919	-0.10676	0.0677131	0.980666	0.898741	1.07006	0.969453
SRGN	finngen_R11_M13_RHEUMA	Rheumatoid arthritis || id:finngen_R11_M13_RHEUMA	SRGN++Platelet_proteoglycan	Weighted mode	5	-0.02138	0.0419843	0.637392	-0.103669	0.0609093	0.978847	0.901523	1.0628	0.9821
SRGN	finngen_R11_M13_RHEUMA	Rheumatoid arthritis || id:finngen_R11_M13_RHEUMA	SRGN++Platelet_proteoglycan	Maximum likelihood	5	-0.00634143	0.0410977	0.877372	-0.086893	0.0742101	0.993679	0.916775	1.07703	0.975865
SRGN	finngen_R11_M13_RHEUMA	Rheumatoid arthritis || id:finngen_R11_M13_RHEUMA	SRGN++Platelet_proteoglycan	Simple mode	5	-0.02138	0.0829242	0.809263	-0.183911	0.141151	0.978847	0.832009	1.1516	0.994896
GMPR	finngen_R11_M13_RHEUMA	Rheumatoid arthritis || id:finngen_R11_M13_RHEUMA	GMPR++GMPR1_NA_GMPR1	Inverse variance weighted	6	-0.0138627	0.0201318	0.491075	-0.053321	0.0255955	0.986233	0.948076	1.02593	0.990373
GMPR	finngen_R11_M13_RHEUMA	Rheumatoid arthritis || id:finngen_R11_M13_RHEUMA	GMPR++GMPR1_NA_GMPR1	MR Egger	6	-0.0589588	0.0482847	0.289111	-0.153597	0.0356793	0.942746	0.857618	1.03632	0.999671
GMPR	finngen_R11_M13_RHEUMA	Rheumatoid arthritis || id:finngen_R11_M13_RHEUMA	GMPR++GMPR1_NA_GMPR1	Weighted median	6	-0.0184209	0.0238033	0.439002	-0.0650754	0.0282336	0.981748	0.936997	1.02864	0.903248
GMPR	finngen_R11_M13_RHEUMA	Rheumatoid arthritis || id:finngen_R11_M13_RHEUMA	GMPR++GMPR1_NA_GMPR1	Weighted mode	6	-0.0196079	0.0235753	0.443466	-0.0658156	0.0265998	0.980583	0.936304	1.02696	0.976532
GMPR	finngen_R11_M13_RHEUMA	Rheumatoid arthritis || id:finngen_R11_M13_RHEUMA	GMPR++GMPR1_NA_GMPR1	Maximum likelihood	6	-0.0138838	0.020138	0.49055	-0.0533542	0.0255866	0.986212	0.948044	1.02592	0.9072
GMPR	finngen_R11_M13_RHEUMA	Rheumatoid arthritis || id:finngen_R11_M13_RHEUMA	GMPR++GMPR1_NA_GMPR1	Simple mode	6	-0.0231941	0.0310792	0.489072	-0.0841093	0.0377211	0.977073	0.919331	1.03844	0.994896
SDCBP2	finngen_R11_M13_RHEUMA	Rheumatoid arthritis || id:finngen_R11_M13_RHEUMA	SDCBP2++SDCB2_NA_SDCB2	Wald ratio	1	0.365601	0.285256	0.199963	-0.193501	0.924703	1.44138	0.824069	2.52112	0.691796
ACADVL	finngen_R11_M13_RHEUMA	Rheumatoid arthritis || id:finngen_R11_M13_RHEUMA	ACADVL++ACADV_NA_ACADV	Wald ratio	1	0.809502	0.262201	0.00201962	0.295588	1.32342	2.24679	1.34392	3.75623	0.113803
G3BP1	finngen_R11_M13_RHEUMA	Rheumatoid arthritis || id:finngen_R11_M13_RHEUMA	G3BP1++G3BP1_NA_G3BP1	Wald ratio	1	-0.122831	0.191696	0.521679	-0.498555	0.252893	0.884413	0.607407	1.28775	0.859133
HAGH	finngen_R11_M13_RHEUMA	Rheumatoid arthritis || id:finngen_R11_M13_RHEUMA	HAGH++GLO2_NA_GLO2	Inverse variance weighted	2	0.151898	0.078217	0.052136	-0.00140718	0.305204	1.16404	0.998594	1.3569	0.686968
HAGH	finngen_R11_M13_RHEUMA	Rheumatoid arthritis || id:finngen_R11_M13_RHEUMA	HAGH++GLO2_NA_GLO2	Maximum likelihood	2	0.152161	0.0787426	0.0533125	-0.00217481	0.306496	1.16435	0.997828	1.35866	0.510732
RBP1	finngen_R11_M13_RHEUMA	Rheumatoid arthritis || id:finngen_R11_M13_RHEUMA	RBP1++CRBP_NA_CRBP	Wald ratio	1	-0.215565	0.173196	0.213269	-0.55503	0.1239	0.806086	0.574055	1.1319	0.715607
UROD	finngen_R11_M13_RHEUMA	Rheumatoid arthritis || id:finngen_R11_M13_RHEUMA	UROD++DCUP_NA_DCUP	Inverse variance weighted	3	0.111655	0.0503481	0.0265773	0.0129732	0.210338	1.11813	1.01306	1.23409	0.528079
UROD	finngen_R11_M13_RHEUMA	Rheumatoid arthritis || id:finngen_R11_M13_RHEUMA	UROD++DCUP_NA_DCUP	MR Egger	3	0.0981536	0.0865292	0.459983	-0.0714438	0.267751	1.10313	0.931049	1.30702	0.999671
UROD	finngen_R11_M13_RHEUMA	Rheumatoid arthritis || id:finngen_R11_M13_RHEUMA	UROD++DCUP_NA_DCUP	Weighted median	3	0.111843	0.04958	0.0240831	0.0146658	0.209019	1.11834	1.01477	1.23247	0.412924
UROD	finngen_R11_M13_RHEUMA	Rheumatoid arthritis || id:finngen_R11_M13_RHEUMA	UROD++DCUP_NA_DCUP	Weighted mode	3	0.112268	0.0515809	0.161462	0.0111693	0.213367	1.11881	1.01123	1.23784	0.976532
UROD	finngen_R11_M13_RHEUMA	Rheumatoid arthritis || id:finngen_R11_M13_RHEUMA	UROD++DCUP_NA_DCUP	Maximum likelihood	3	0.111718	0.0504676	0.0268522	0.0128016	0.210635	1.1182	1.01288	1.23446	0.38069
UROD	finngen_R11_M13_RHEUMA	Rheumatoid arthritis || id:finngen_R11_M13_RHEUMA	UROD++DCUP_NA_DCUP	Simple mode	3	0.126498	0.093126	0.30728	-0.056029	0.309025	1.13485	0.945512	1.3621	0.994896
VPS26A	finngen_R11_M13_RHEUMA	Rheumatoid arthritis || id:finngen_R11_M13_RHEUMA	VPS26A++VP26A_NA_VP26A	Wald ratio	1	0.011371	0.071491	0.873626	-0.128751	0.151493	1.01144	0.879192	1.16357	0.948945
TXNDC12	finngen_R11_M13_RHEUMA	Rheumatoid arthritis || id:finngen_R11_M13_RHEUMA	TXNDC12++TXD12_NA_TXD12	Wald ratio	1	-0.0781395	0.142161	0.582555	-0.356774	0.200495	0.924835	0.699931	1.22201	0.885657
LZIC	finngen_R11_M13_RHEUMA	Rheumatoid arthritis || id:finngen_R11_M13_RHEUMA	LZIC++LZIC_NA_LZIC	Wald ratio	1	0.0127647	0.220012	0.953734	-0.418459	0.443988	1.01285	0.65806	1.55891	0.981941
CA12	finngen_R11_M13_RHEUMA	Rheumatoid arthritis || id:finngen_R11_M13_RHEUMA	CA12++Carbonic_Anhydrase_XII	Wald ratio	1	0.289867	0.273086	0.288485	-0.245381	0.825115	1.33625	0.782406	2.28214	0.747378
MATN3	finngen_R11_M13_RHEUMA	Rheumatoid arthritis || id:finngen_R11_M13_RHEUMA	MATN3++MATN3_NA_MATN3	Inverse variance weighted (multiplicative random effects)	12	0.0297756	0.0301964	0.324101	-0.0294093	0.0889605	1.03022	0.971019	1.09304	0.986776
MATN3	finngen_R11_M13_RHEUMA	Rheumatoid arthritis || id:finngen_R11_M13_RHEUMA	MATN3++MATN3_NA_MATN3	MR Egger	12	0.00688895	0.061662	0.913255	-0.113969	0.127746	1.00691	0.892286	1.13626	0.999671
MATN3	finngen_R11_M13_RHEUMA	Rheumatoid arthritis || id:finngen_R11_M13_RHEUMA	MATN3++MATN3_NA_MATN3	Weighted median	12	0.0207533	0.0235504	0.378195	-0.0254056	0.0669122	1.02097	0.974914	1.0692	0.88643
MATN3	finngen_R11_M13_RHEUMA	Rheumatoid arthritis || id:finngen_R11_M13_RHEUMA	MATN3++MATN3_NA_MATN3	Weighted mode	12	0.0165411	0.0233105	0.492721	-0.0291476	0.0622298	1.01668	0.971273	1.06421	0.976532
MATN3	finngen_R11_M13_RHEUMA	Rheumatoid arthritis || id:finngen_R11_M13_RHEUMA	MATN3++MATN3_NA_MATN3	Maximum likelihood	12	0.0300722	0.0201881	0.13633	-0.0094965	0.0696409	1.03053	0.990548	1.07212	0.663866
MATN3	finngen_R11_M13_RHEUMA	Rheumatoid arthritis || id:finngen_R11_M13_RHEUMA	MATN3++MATN3_NA_MATN3	Simple mode	12	0.0087254	0.0557855	0.878544	-0.100614	0.118065	1.00876	0.904282	1.12532	0.994896
MDGA2	finngen_R11_M13_RHEUMA	Rheumatoid arthritis || id:finngen_R11_M13_RHEUMA	MDGA2++MDGA2_NA_MDGA2	Inverse variance weighted	9	-0.0295169	0.0288805	0.306764	-0.0861226	0.0270889	0.970915	0.917482	1.02746	0.986776
MDGA2	finngen_R11_M13_RHEUMA	Rheumatoid arthritis || id:finngen_R11_M13_RHEUMA	MDGA2++MDGA2_NA_MDGA2	MR Egger	9	-0.0589282	0.0609992	0.366201	-0.178487	0.0606302	0.942774	0.836535	1.06251	0.999671
MDGA2	finngen_R11_M13_RHEUMA	Rheumatoid arthritis || id:finngen_R11_M13_RHEUMA	MDGA2++MDGA2_NA_MDGA2	Weighted median	9	-0.0381692	0.031156	0.220537	-0.0992349	0.0228965	0.96255	0.90553	1.02316	0.834332
MDGA2	finngen_R11_M13_RHEUMA	Rheumatoid arthritis || id:finngen_R11_M13_RHEUMA	MDGA2++MDGA2_NA_MDGA2	Weighted mode	9	-0.0399287	0.0294974	0.212852	-0.0977435	0.0178861	0.960858	0.906881	1.01805	0.976532
MDGA2	finngen_R11_M13_RHEUMA	Rheumatoid arthritis || id:finngen_R11_M13_RHEUMA	MDGA2++MDGA2_NA_MDGA2	Maximum likelihood	9	-0.0295725	0.0265335	0.26505	-0.081578	0.0224331	0.970861	0.921661	1.02269	0.817785
MDGA2	finngen_R11_M13_RHEUMA	Rheumatoid arthritis || id:finngen_R11_M13_RHEUMA	MDGA2++MDGA2_NA_MDGA2	Simple mode	9	-0.0578127	0.0497466	0.278671	-0.155316	0.0396905	0.943827	0.856145	1.04049	0.994896
NNMT	finngen_R11_M13_RHEUMA	Rheumatoid arthritis || id:finngen_R11_M13_RHEUMA	NNMT++NNMT_NA_NNMT	Wald ratio	1	-0.265047	0.292973	0.365634	-0.839273	0.309179	0.76717	0.432024	1.36231	0.777232
CINP	finngen_R11_M13_RHEUMA	Rheumatoid arthritis || id:finngen_R11_M13_RHEUMA	CINP++CINP_NA_CINP	Wald ratio	1	0.31297	0.277633	0.259624	-0.231191	0.857132	1.36748	0.793588	2.35639	0.722927
GMPR2	finngen_R11_M13_RHEUMA	Rheumatoid arthritis || id:finngen_R11_M13_RHEUMA	GMPR2++GMPR2_NA_GMPR2	Inverse variance weighted	2	-0.0641205	0.0568608	0.259457	-0.175568	0.0473266	0.937892	0.838981	1.04846	0.971879
GMPR2	finngen_R11_M13_RHEUMA	Rheumatoid arthritis || id:finngen_R11_M13_RHEUMA	GMPR2++GMPR2_NA_GMPR2	Maximum likelihood	2	-0.0641207	0.0569013	0.259796	-0.175647	0.047406	0.937892	0.838914	1.04855	0.808464
UPP1	finngen_R11_M13_RHEUMA	Rheumatoid arthritis || id:finngen_R11_M13_RHEUMA	UPP1++UPP1_NA_UPP1	Wald ratio	1	0.0571658	0.118642	0.629922	-0.175372	0.289703	1.05883	0.839145	1.33603	0.89289
HDHD3	finngen_R11_M13_RHEUMA	Rheumatoid arthritis || id:finngen_R11_M13_RHEUMA	HDHD3++HDHD3_NA_HDHD3	Wald ratio	1	-0.0725403	0.0699938	0.300024	-0.209728	0.0646475	0.930028	0.810805	1.06678	0.753386
NPL	finngen_R11_M13_RHEUMA	Rheumatoid arthritis || id:finngen_R11_M13_RHEUMA	NPL++NPL_NA_NPL	Inverse variance weighted	4	-0.0963077	0.0620568	0.120679	-0.217939	0.0253237	0.908185	0.804174	1.02565	0.825523
NPL	finngen_R11_M13_RHEUMA	Rheumatoid arthritis || id:finngen_R11_M13_RHEUMA	NPL++NPL_NA_NPL	MR Egger	4	-0.17588	0.151593	0.365737	-0.473002	0.121241	0.838718	0.623129	1.1289	0.999671
NPL	finngen_R11_M13_RHEUMA	Rheumatoid arthritis || id:finngen_R11_M13_RHEUMA	NPL++NPL_NA_NPL	Weighted median	4	-0.100774	0.0651085	0.121673	-0.228387	0.0268385	0.904137	0.795816	1.0272	0.741757
NPL	finngen_R11_M13_RHEUMA	Rheumatoid arthritis || id:finngen_R11_M13_RHEUMA	NPL++NPL_NA_NPL	Weighted mode	4	-0.101099	0.0682171	0.234944	-0.234804	0.0326064	0.903844	0.790725	1.03314	0.976532
NPL	finngen_R11_M13_RHEUMA	Rheumatoid arthritis || id:finngen_R11_M13_RHEUMA	NPL++NPL_NA_NPL	Maximum likelihood	4	-0.0964593	0.0623402	0.121789	-0.218646	0.0257274	0.908047	0.803606	1.02606	0.643416
NPL	finngen_R11_M13_RHEUMA	Rheumatoid arthritis || id:finngen_R11_M13_RHEUMA	NPL++NPL_NA_NPL	Simple mode	4	-0.0620939	0.128353	0.661662	-0.313666	0.189479	0.939795	0.730763	1.20862	0.994896
DTYMK	finngen_R11_M13_RHEUMA	Rheumatoid arthritis || id:finngen_R11_M13_RHEUMA	DTYMK++KTHY_NA_KTHY	Inverse variance weighted	4	-0.0202754	0.139645	0.884559	-0.29398	0.253429	0.979929	0.745292	1.28844	0.992378
DTYMK	finngen_R11_M13_RHEUMA	Rheumatoid arthritis || id:finngen_R11_M13_RHEUMA	DTYMK++KTHY_NA_KTHY	MR Egger	4	-0.335753	1.00683	0.770492	-2.30914	1.63764	0.7148	0.0993465	5.143	0.999671
DTYMK	finngen_R11_M13_RHEUMA	Rheumatoid arthritis || id:finngen_R11_M13_RHEUMA	DTYMK++KTHY_NA_KTHY	Weighted median	4	-0.124853	0.143797	0.385252	-0.406696	0.156989	0.882626	0.665847	1.16998	0.88643
DTYMK	finngen_R11_M13_RHEUMA	Rheumatoid arthritis || id:finngen_R11_M13_RHEUMA	DTYMK++KTHY_NA_KTHY	Weighted mode	4	-0.125408	0.141594	0.44102	-0.402933	0.152117	0.882137	0.668357	1.1643	0.976532
DTYMK	finngen_R11_M13_RHEUMA	Rheumatoid arthritis || id:finngen_R11_M13_RHEUMA	DTYMK++KTHY_NA_KTHY	Maximum likelihood	4	-0.0206179	0.125068	0.869059	-0.26575	0.224515	0.979593	0.76663	1.25172	0.975865
DTYMK	finngen_R11_M13_RHEUMA	Rheumatoid arthritis || id:finngen_R11_M13_RHEUMA	DTYMK++KTHY_NA_KTHY	Simple mode	4	-0.078017	0.206946	0.731267	-0.483631	0.327597	0.924949	0.616541	1.38763	0.994896
PARK7	finngen_R11_M13_RHEUMA	Rheumatoid arthritis || id:finngen_R11_M13_RHEUMA	PARK7++PARK7_NA_PARK7	Inverse variance weighted	2	-0.236896	0.180074	0.188326	-0.589842	0.11605	0.789073	0.554415	1.12305	0.927309
PARK7	finngen_R11_M13_RHEUMA	Rheumatoid arthritis || id:finngen_R11_M13_RHEUMA	PARK7++PARK7_NA_PARK7	Maximum likelihood	2	-0.23879	0.10559	0.02373	-0.445747	-0.0318326	0.787581	0.640346	0.968669	0.37502
KLB	finngen_R11_M13_RHEUMA	Rheumatoid arthritis || id:finngen_R11_M13_RHEUMA	KLB++KLOTB_NA_KLOTB	Inverse variance weighted	8	-0.00432552	0.0225342	0.847779	-0.0484926	0.0398416	0.995684	0.952664	1.04065	0.992378
KLB	finngen_R11_M13_RHEUMA	Rheumatoid arthritis || id:finngen_R11_M13_RHEUMA	KLB++KLOTB_NA_KLOTB	MR Egger	8	-0.0109704	0.0367269	0.775242	-0.0829551	0.0610143	0.98909	0.920392	1.06291	0.999671
KLB	finngen_R11_M13_RHEUMA	Rheumatoid arthritis || id:finngen_R11_M13_RHEUMA	KLB++KLOTB_NA_KLOTB	Weighted median	8	-0.00412852	0.0237349	0.86191	-0.0506489	0.0423919	0.99588	0.950612	1.0433	0.982685
KLB	finngen_R11_M13_RHEUMA	Rheumatoid arthritis || id:finngen_R11_M13_RHEUMA	KLB++KLOTB_NA_KLOTB	Weighted mode	8	-0.0021991	0.0252043	0.932916	-0.0515995	0.0472013	0.997803	0.949709	1.04833	0.984041
KLB	finngen_R11_M13_RHEUMA	Rheumatoid arthritis || id:finngen_R11_M13_RHEUMA	KLB++KLOTB_NA_KLOTB	Maximum likelihood	8	-0.00432336	0.0225441	0.847919	-0.0485097	0.039863	0.995686	0.952648	1.04067	0.975865
KLB	finngen_R11_M13_RHEUMA	Rheumatoid arthritis || id:finngen_R11_M13_RHEUMA	KLB++KLOTB_NA_KLOTB	Simple mode	8	-0.00076895	0.0471883	0.987453	-0.093258	0.0917201	0.999231	0.910958	1.09606	0.997349
LRP4	finngen_R11_M13_RHEUMA	Rheumatoid arthritis || id:finngen_R11_M13_RHEUMA	LRP4++LRP4_NA_LRP4	Inverse variance weighted	2	0.092707	0.0317942	0.00354723	0.0303904	0.155024	1.09714	1.03086	1.16769	0.24162
LRP4	finngen_R11_M13_RHEUMA	Rheumatoid arthritis || id:finngen_R11_M13_RHEUMA	LRP4++LRP4_NA_LRP4	Maximum likelihood	2	0.0927285	0.031843	0.00359063	0.0303162	0.155141	1.09716	1.03078	1.16782	0.168268
PLXNA4	finngen_R11_M13_RHEUMA	Rheumatoid arthritis || id:finngen_R11_M13_RHEUMA	PLXNA4++PLXA4_NA_PLXA4	Wald ratio	1	0.121757	0.142717	0.393583	-0.157968	0.401483	1.12948	0.853877	1.49404	0.789923
PLXND1	finngen_R11_M13_RHEUMA	Rheumatoid arthritis || id:finngen_R11_M13_RHEUMA	PLXND1++PLXD1_NA_PLXD1	Inverse variance weighted	4	-0.000788195	0.0485784	0.987055	-0.0960019	0.0944255	0.999212	0.908462	1.09903	0.998932
PLXND1	finngen_R11_M13_RHEUMA	Rheumatoid arthritis || id:finngen_R11_M13_RHEUMA	PLXND1++PLXD1_NA_PLXD1	MR Egger	4	-0.0550254	0.102136	0.644006	-0.255212	0.145161	0.946461	0.774752	1.15623	0.999671
PLXND1	finngen_R11_M13_RHEUMA	Rheumatoid arthritis || id:finngen_R11_M13_RHEUMA	PLXND1++PLXD1_NA_PLXD1	Weighted median	4	-0.014838	0.048789	0.761033	-0.110464	0.0807885	0.985272	0.895418	1.08414	0.982685
PLXND1	finngen_R11_M13_RHEUMA	Rheumatoid arthritis || id:finngen_R11_M13_RHEUMA	PLXND1++PLXD1_NA_PLXD1	Weighted mode	4	-0.0150744	0.0531248	0.795055	-0.119199	0.0890502	0.985039	0.887631	1.09314	0.984041
PLXND1	finngen_R11_M13_RHEUMA	Rheumatoid arthritis || id:finngen_R11_M13_RHEUMA	PLXND1++PLXD1_NA_PLXD1	Maximum likelihood	4	-0.0007934	0.0486555	0.98699	-0.0961581	0.0945713	0.999207	0.90832	1.09919	0.997118
PLXND1	finngen_R11_M13_RHEUMA	Rheumatoid arthritis || id:finngen_R11_M13_RHEUMA	PLXND1++PLXD1_NA_PLXD1	Simple mode	4	-0.0303018	0.0740136	0.709717	-0.175369	0.114765	0.970153	0.839148	1.12161	0.994896
DOK2	finngen_R11_M13_RHEUMA	Rheumatoid arthritis || id:finngen_R11_M13_RHEUMA	DOK2++DOK2_NA_DOK2	Wald ratio	1	0.418675	0.415459	0.313579	-0.395624	1.23297	1.51995	0.67326	3.43142	0.756655
IGFBP5	finngen_R11_M13_RHEUMA	Rheumatoid arthritis || id:finngen_R11_M13_RHEUMA	IGFBP5++IGFBP_5	Wald ratio	1	-0.038206	0.244222	0.875687	-0.516882	0.44047	0.962515	0.596377	1.55344	0.948945
SFTPD	finngen_R11_M13_RHEUMA	Rheumatoid arthritis || id:finngen_R11_M13_RHEUMA	SFTPD++SP_D	Inverse variance weighted	6	-0.0109662	0.0279004	0.694283	-0.065651	0.0437186	0.989094	0.936458	1.04469	0.990373
SFTPD	finngen_R11_M13_RHEUMA	Rheumatoid arthritis || id:finngen_R11_M13_RHEUMA	SFTPD++SP_D	MR Egger	6	-0.0170171	0.042997	0.712474	-0.101291	0.0672571	0.983127	0.90367	1.06957	0.999671
SFTPD	finngen_R11_M13_RHEUMA	Rheumatoid arthritis || id:finngen_R11_M13_RHEUMA	SFTPD++SP_D	Weighted median	6	-0.0207776	0.0296133	0.482909	-0.0788196	0.0372644	0.979437	0.924207	1.03797	0.907615
SFTPD	finngen_R11_M13_RHEUMA	Rheumatoid arthritis || id:finngen_R11_M13_RHEUMA	SFTPD++SP_D	Weighted mode	6	-0.0206138	0.0313827	0.540302	-0.082124	0.0408964	0.979597	0.921158	1.04174	0.976532
SFTPD	finngen_R11_M13_RHEUMA	Rheumatoid arthritis || id:finngen_R11_M13_RHEUMA	SFTPD++SP_D	Maximum likelihood	6	-0.0109723	0.0279057	0.694177	-0.0656674	0.0437228	0.989088	0.936442	1.04469	0.940262
SFTPD	finngen_R11_M13_RHEUMA	Rheumatoid arthritis || id:finngen_R11_M13_RHEUMA	SFTPD++SP_D	Simple mode	6	-0.00838719	0.0538093	0.882234	-0.113853	0.0970791	0.991648	0.892389	1.10195	0.994896
JUND	finngen_R11_M13_RHEUMA	Rheumatoid arthritis || id:finngen_R11_M13_RHEUMA	JUND++jun_D	Wald ratio	1	0.796332	0.217971	0.000258813	0.369108	1.22356	2.21739	1.44644	3.39926	0.0480529
IHH	finngen_R11_M13_RHEUMA	Rheumatoid arthritis || id:finngen_R11_M13_RHEUMA	IHH++ihh_NA_ihh	Inverse variance weighted	3	-0.206623	0.13026	0.112686	-0.461932	0.0486868	0.813327	0.630065	1.04989	0.801078
IHH	finngen_R11_M13_RHEUMA	Rheumatoid arthritis || id:finngen_R11_M13_RHEUMA	IHH++ihh_NA_ihh	MR Egger	3	-0.381287	0.212533	0.323731	-0.797852	0.0352787	0.682982	0.450295	1.03591	0.999671
IHH	finngen_R11_M13_RHEUMA	Rheumatoid arthritis || id:finngen_R11_M13_RHEUMA	IHH++ihh_NA_ihh	Weighted median	3	-0.210011	0.153761	0.171992	-0.511382	0.09136	0.810575	0.599666	1.09566	0.834332
IHH	finngen_R11_M13_RHEUMA	Rheumatoid arthritis || id:finngen_R11_M13_RHEUMA	IHH++ihh_NA_ihh	Weighted mode	3	-0.2861	0.208688	0.303962	-0.695129	0.122928	0.751187	0.49901	1.1308	0.976532
IHH	finngen_R11_M13_RHEUMA	Rheumatoid arthritis || id:finngen_R11_M13_RHEUMA	IHH++ihh_NA_ihh	Maximum likelihood	3	-0.20864	0.132004	0.11398	-0.467369	0.0500887	0.811687	0.626649	1.05136	0.621528
IHH	finngen_R11_M13_RHEUMA	Rheumatoid arthritis || id:finngen_R11_M13_RHEUMA	IHH++ihh_NA_ihh	Simple mode	3	-0.129678	0.207509	0.595814	-0.536395	0.27704	0.878379	0.584853	1.31922	0.994896
NT5C3A	finngen_R11_M13_RHEUMA	Rheumatoid arthritis || id:finngen_R11_M13_RHEUMA	NT5C3A++5NT3_NA_5NT3	Wald ratio	1	0.194586	0.164727	0.237499	-0.128279	0.517451	1.21481	0.879608	1.67775	0.722258
INHBA	finngen_R11_M13_RHEUMA	Rheumatoid arthritis || id:finngen_R11_M13_RHEUMA	INHBA++Activin_A	Wald ratio	1	-0.0585111	0.147023	0.690651	-0.346677	0.229655	0.943168	0.707034	1.25817	0.921545
KNG1	finngen_R11_M13_RHEUMA	Rheumatoid arthritis || id:finngen_R11_M13_RHEUMA	KNG1++Kininostatin_NA_Kininostatin	Inverse variance weighted	2	-0.0256312	0.0580877	0.659031	-0.139483	0.0882206	0.974694	0.869808	1.09223	0.990373
KNG1	finngen_R11_M13_RHEUMA	Rheumatoid arthritis || id:finngen_R11_M13_RHEUMA	KNG1++Kininostatin_NA_Kininostatin	Maximum likelihood	2	-0.0256641	0.051929	0.621154	-0.127445	0.0761167	0.974662	0.880342	1.07909	0.929849
FGL2	finngen_R11_M13_RHEUMA	Rheumatoid arthritis || id:finngen_R11_M13_RHEUMA	FGL2++FGL2_NA_FGL2	Wald ratio	1	-0.320721	0.288976	0.267063	-0.887115	0.245672	0.725626	0.411842	1.27848	0.722927
CRH	finngen_R11_M13_RHEUMA	Rheumatoid arthritis || id:finngen_R11_M13_RHEUMA	CRH++CRH_NA_CRH	Wald ratio	1	-0.0141292	0.371034	0.969623	-0.741356	0.713097	0.98597	0.476467	2.0403	0.986818
F11	finngen_R11_M13_RHEUMA	Rheumatoid arthritis || id:finngen_R11_M13_RHEUMA	F11++Coagulation_Factor_XI	Inverse variance weighted	2	0.0711055	0.0362594	0.0498761	3.71649e-05	0.142174	1.07369	1.00004	1.15278	0.686968
F11	finngen_R11_M13_RHEUMA	Rheumatoid arthritis || id:finngen_R11_M13_RHEUMA	F11++Coagulation_Factor_XI	Maximum likelihood	2	0.0711225	0.0362861	0.0499899	1.822e-06	0.142243	1.07371	1	1.15286	0.510732
CCL27	finngen_R11_M13_RHEUMA	Rheumatoid arthritis || id:finngen_R11_M13_RHEUMA	CCL27++CTACK_NA_CTACK	Wald ratio	1	-0.0484775	0.252829	0.847946	-0.544023	0.447068	0.952679	0.580408	1.56372	0.946505
TIMP2	finngen_R11_M13_RHEUMA	Rheumatoid arthritis || id:finngen_R11_M13_RHEUMA	TIMP2++TIMP_2	Inverse variance weighted	2	-0.135034	0.153912	0.3803	-0.436701	0.166634	0.873686	0.646164	1.18132	0.990373
TIMP2	finngen_R11_M13_RHEUMA	Rheumatoid arthritis || id:finngen_R11_M13_RHEUMA	TIMP2++TIMP_2	Maximum likelihood	2	-0.135268	0.154599	0.381596	-0.438282	0.167746	0.873482	0.645144	1.18264	0.886332
C5	finngen_R11_M13_RHEUMA	Rheumatoid arthritis || id:finngen_R11_M13_RHEUMA	C5++C5_NA_C5	Inverse variance weighted	2	-0.223614	0.128174	0.081051	-0.474834	0.027606	0.799624	0.621988	1.02799	0.760764
C5	finngen_R11_M13_RHEUMA	Rheumatoid arthritis || id:finngen_R11_M13_RHEUMA	C5++C5_NA_C5	Maximum likelihood	2	-0.224978	0.101278	0.0263242	-0.423482	-0.0264735	0.798534	0.654763	0.973874	0.377989
APOE	finngen_R11_M13_RHEUMA	Rheumatoid arthritis || id:finngen_R11_M13_RHEUMA	APOE++Apo_E	Inverse variance weighted	6	0.0840576	0.0464133	0.0701307	-0.00691254	0.175028	1.08769	0.993111	1.19128	0.714727
APOE	finngen_R11_M13_RHEUMA	Rheumatoid arthritis || id:finngen_R11_M13_RHEUMA	APOE++Apo_E	MR Egger	6	0.0726195	0.184859	0.714476	-0.289704	0.434943	1.07532	0.748485	1.54488	0.999671
APOE	finngen_R11_M13_RHEUMA	Rheumatoid arthritis || id:finngen_R11_M13_RHEUMA	APOE++Apo_E	Weighted median	6	0.0716353	0.0488215	0.142297	-0.0240549	0.167325	1.07426	0.976232	1.18214	0.810567
APOE	finngen_R11_M13_RHEUMA	Rheumatoid arthritis || id:finngen_R11_M13_RHEUMA	APOE++Apo_E	Weighted mode	6	0.071244	0.0518256	0.227639	-0.0303342	0.172822	1.07384	0.970121	1.18865	0.976532
APOE	finngen_R11_M13_RHEUMA	Rheumatoid arthritis || id:finngen_R11_M13_RHEUMA	APOE++Apo_E	Maximum likelihood	6	0.0841883	0.0465075	0.0702632	-0.00696635	0.175343	1.08783	0.993058	1.19165	0.533461
APOE	finngen_R11_M13_RHEUMA	Rheumatoid arthritis || id:finngen_R11_M13_RHEUMA	APOE++Apo_E	Simple mode	6	0.120928	0.0901821	0.237634	-0.0558292	0.297685	1.12854	0.945701	1.34674	0.994896
BDNF	finngen_R11_M13_RHEUMA	Rheumatoid arthritis || id:finngen_R11_M13_RHEUMA	BDNF++BDNF_NA_BDNF	Wald ratio	1	0.248753	0.161322	0.123082	-0.0674381	0.564945	1.28243	0.934786	1.75935	0.569588
CXCL16	finngen_R11_M13_RHEUMA	Rheumatoid arthritis || id:finngen_R11_M13_RHEUMA	CXCL16++CXCL16__soluble	Inverse variance weighted (multiplicative random effects)	5	0.0720359	0.0954529	0.450444	-0.115052	0.259123	1.07469	0.89132	1.29579	0.990373
CXCL16	finngen_R11_M13_RHEUMA	Rheumatoid arthritis || id:finngen_R11_M13_RHEUMA	CXCL16++CXCL16__soluble	MR Egger	5	0.10919	0.172222	0.571116	-0.228365	0.446746	1.11537	0.795833	1.56322	0.999671
CXCL16	finngen_R11_M13_RHEUMA	Rheumatoid arthritis || id:finngen_R11_M13_RHEUMA	CXCL16++CXCL16__soluble	Weighted median	5	0.0217444	0.0532986	0.683293	-0.0827208	0.12621	1.02198	0.920608	1.13452	0.97421
CXCL16	finngen_R11_M13_RHEUMA	Rheumatoid arthritis || id:finngen_R11_M13_RHEUMA	CXCL16++CXCL16__soluble	Weighted mode	5	0.0236954	0.0556144	0.691986	-0.0853089	0.1327	1.02398	0.918229	1.14191	0.9821
CXCL16	finngen_R11_M13_RHEUMA	Rheumatoid arthritis || id:finngen_R11_M13_RHEUMA	CXCL16++CXCL16__soluble	Maximum likelihood	5	0.0736986	0.044442	0.0972549	-0.0134077	0.160805	1.07648	0.986682	1.17446	0.599239
CXCL16	finngen_R11_M13_RHEUMA	Rheumatoid arthritis || id:finngen_R11_M13_RHEUMA	CXCL16++CXCL16__soluble	Simple mode	5	0.0131052	0.0696751	0.859962	-0.123458	0.149668	1.01319	0.883859	1.16145	0.994896
KIT	finngen_R11_M13_RHEUMA	Rheumatoid arthritis || id:finngen_R11_M13_RHEUMA	KIT++SCF_sR	Wald ratio	1	-0.138345	0.269749	0.608046	-0.667054	0.390364	0.870798	0.513218	1.47752	0.885657
CCL21	finngen_R11_M13_RHEUMA	Rheumatoid arthritis || id:finngen_R11_M13_RHEUMA	CCL21++6Ckine_NA_6Ckine	Inverse variance weighted	2	-0.279679	0.472856	0.554207	-1.20648	0.647119	0.756026	0.29925	1.91003	0.990373
CCL21	finngen_R11_M13_RHEUMA	Rheumatoid arthritis || id:finngen_R11_M13_RHEUMA	CCL21++6Ckine_NA_6Ckine	Maximum likelihood	2	-0.315167	0.111802	0.00481756	-0.534298	-0.096036	0.729667	0.58608	0.908431	0.189276
CFI	finngen_R11_M13_RHEUMA	Rheumatoid arthritis || id:finngen_R11_M13_RHEUMA	CFI++Factor_I	Inverse variance weighted	2	0.0638284	0.184805	0.729807	-0.298389	0.426046	1.06591	0.742013	1.53119	0.990373
CFI	finngen_R11_M13_RHEUMA	Rheumatoid arthritis || id:finngen_R11_M13_RHEUMA	CFI++Factor_I	Maximum likelihood	2	0.0641595	0.185711	0.729733	-0.299833	0.428152	1.06626	0.740942	1.53442	0.952486
IGFBP3	finngen_R11_M13_RHEUMA	Rheumatoid arthritis || id:finngen_R11_M13_RHEUMA	IGFBP3++IGFBP_3	Inverse variance weighted	4	0.0516043	0.0332697	0.12088	-0.0136043	0.116813	1.05296	0.986488	1.12391	0.825523
IGFBP3	finngen_R11_M13_RHEUMA	Rheumatoid arthritis || id:finngen_R11_M13_RHEUMA	IGFBP3++IGFBP_3	MR Egger	4	0.0297042	0.0403154	0.537954	-0.049314	0.108722	1.03015	0.951882	1.11485	0.999671
IGFBP3	finngen_R11_M13_RHEUMA	Rheumatoid arthritis || id:finngen_R11_M13_RHEUMA	IGFBP3++IGFBP_3	Weighted median	4	0.0461492	0.0351598	0.189333	-0.022764	0.115062	1.04723	0.977493	1.12194	0.834332
IGFBP3	finngen_R11_M13_RHEUMA	Rheumatoid arthritis || id:finngen_R11_M13_RHEUMA	IGFBP3++IGFBP_3	Weighted mode	4	0.0420724	0.0370847	0.339038	-0.0306136	0.114758	1.04297	0.96985	1.1216	0.976532
IGFBP3	finngen_R11_M13_RHEUMA	Rheumatoid arthritis || id:finngen_R11_M13_RHEUMA	IGFBP3++IGFBP_3	Maximum likelihood	4	0.0516374	0.0333177	0.121178	-0.0136654	0.11694	1.05299	0.986428	1.12405	0.643222
IGFBP3	finngen_R11_M13_RHEUMA	Rheumatoid arthritis || id:finngen_R11_M13_RHEUMA	IGFBP3++IGFBP_3	Simple mode	4	0.076855	0.0690449	0.346821	-0.0584731	0.212183	1.07989	0.943204	1.23637	0.994896
MMP9	finngen_R11_M13_RHEUMA	Rheumatoid arthritis || id:finngen_R11_M13_RHEUMA	MMP9++MMP_9	Wald ratio	1	-0.191622	0.139322	0.169011	-0.464693	0.0814491	0.825619	0.628328	1.08486	0.653743
MPO	finngen_R11_M13_RHEUMA	Rheumatoid arthritis || id:finngen_R11_M13_RHEUMA	MPO++Myeloperoxidase_NA_Myeloperoxidase	Inverse variance weighted	6	-0.0471045	0.0285141	0.0985406	-0.102992	0.0087832	0.953988	0.902134	1.00882	0.788324
MPO	finngen_R11_M13_RHEUMA	Rheumatoid arthritis || id:finngen_R11_M13_RHEUMA	MPO++Myeloperoxidase_NA_Myeloperoxidase	MR Egger	6	-0.108197	0.0699626	0.196888	-0.245323	0.0289301	0.897451	0.782451	1.02935	0.999671
MPO	finngen_R11_M13_RHEUMA	Rheumatoid arthritis || id:finngen_R11_M13_RHEUMA	MPO++Myeloperoxidase_NA_Myeloperoxidase	Weighted median	6	-0.0490203	0.0327132	0.134006	-0.113138	0.0150975	0.952162	0.893027	1.01521	0.78218
MPO	finngen_R11_M13_RHEUMA	Rheumatoid arthritis || id:finngen_R11_M13_RHEUMA	MPO++Myeloperoxidase_NA_Myeloperoxidase	Weighted mode	6	-0.0553114	0.0315446	0.139902	-0.117139	0.0065161	0.94619	0.889462	1.00654	0.976532
MPO	finngen_R11_M13_RHEUMA	Rheumatoid arthritis || id:finngen_R11_M13_RHEUMA	MPO++Myeloperoxidase_NA_Myeloperoxidase	Maximum likelihood	6	-0.0471669	0.027168	0.0825424	-0.100416	0.00608234	0.953928	0.904461	1.0061	0.57898
MPO	finngen_R11_M13_RHEUMA	Rheumatoid arthritis || id:finngen_R11_M13_RHEUMA	MPO++Myeloperoxidase_NA_Myeloperoxidase	Simple mode	6	-0.0349123	0.0408583	0.431868	-0.114995	0.04517	0.96569	0.891371	1.04621	0.994896
ROR1	finngen_R11_M13_RHEUMA	Rheumatoid arthritis || id:finngen_R11_M13_RHEUMA	ROR1++ROR1_NA_ROR1	Inverse variance weighted	2	0.0576981	0.0440103	0.189854	-0.0285622	0.143958	1.0594	0.971842	1.15484	0.927309
ROR1	finngen_R11_M13_RHEUMA	Rheumatoid arthritis || id:finngen_R11_M13_RHEUMA	ROR1++ROR1_NA_ROR1	Maximum likelihood	2	0.0577013	0.0440618	0.190347	-0.0286599	0.144062	1.0594	0.971747	1.15496	0.752884
VEGFA	finngen_R11_M13_RHEUMA	Rheumatoid arthritis || id:finngen_R11_M13_RHEUMA	VEGFA++VEGF_NA_VEGF	Inverse variance weighted	2	-0.0384254	0.0404097	0.341657	-0.117628	0.0407775	0.962303	0.889026	1.04162	0.990373
VEGFA	finngen_R11_M13_RHEUMA	Rheumatoid arthritis || id:finngen_R11_M13_RHEUMA	VEGFA++VEGF_NA_VEGF	Maximum likelihood	2	-0.0384385	0.0404315	0.341753	-0.117684	0.0408073	0.962291	0.888977	1.04165	0.864026
ANGPT2	finngen_R11_M13_RHEUMA	Rheumatoid arthritis || id:finngen_R11_M13_RHEUMA	ANGPT2++Angiopoietin_2	Inverse variance weighted	3	-0.0619681	0.0799504	0.438291	-0.218671	0.0947346	0.939913	0.803586	1.09937	0.990373
ANGPT2	finngen_R11_M13_RHEUMA	Rheumatoid arthritis || id:finngen_R11_M13_RHEUMA	ANGPT2++Angiopoietin_2	MR Egger	3	-0.287581	0.188505	0.369381	-0.657051	0.0818894	0.750076	0.518378	1.08534	0.999671
ANGPT2	finngen_R11_M13_RHEUMA	Rheumatoid arthritis || id:finngen_R11_M13_RHEUMA	ANGPT2++Angiopoietin_2	Weighted median	3	-0.0853981	0.0858061	0.319617	-0.253578	0.0827817	0.918147	0.776019	1.0863	0.88643
ANGPT2	finngen_R11_M13_RHEUMA	Rheumatoid arthritis || id:finngen_R11_M13_RHEUMA	ANGPT2++Angiopoietin_2	Weighted mode	3	-0.0900544	0.0918239	0.430139	-0.270029	0.0899204	0.913881	0.763357	1.09409	0.976532
ANGPT2	finngen_R11_M13_RHEUMA	Rheumatoid arthritis || id:finngen_R11_M13_RHEUMA	ANGPT2++Angiopoietin_2	Maximum likelihood	3	-0.0623119	0.0801452	0.436871	-0.219397	0.0947727	0.93959	0.803003	1.09941	0.894507
ANGPT2	finngen_R11_M13_RHEUMA	Rheumatoid arthritis || id:finngen_R11_M13_RHEUMA	ANGPT2++Angiopoietin_2	Simple mode	3	-0.119684	0.11043	0.391722	-0.336127	0.0967594	0.887201	0.714532	1.1016	0.994896
CST3	finngen_R11_M13_RHEUMA	Rheumatoid arthritis || id:finngen_R11_M13_RHEUMA	CST3++Cystatin_C	Inverse variance weighted	3	0.0322523	0.0546467	0.555059	-0.0748552	0.13936	1.03278	0.927878	1.14954	0.990373
CST3	finngen_R11_M13_RHEUMA	Rheumatoid arthritis || id:finngen_R11_M13_RHEUMA	CST3++Cystatin_C	MR Egger	3	0.130729	0.14303	0.528586	-0.14961	0.411069	1.13966	0.861044	1.50843	0.999671
CST3	finngen_R11_M13_RHEUMA	Rheumatoid arthritis || id:finngen_R11_M13_RHEUMA	CST3++Cystatin_C	Weighted median	3	0.0407739	0.0558959	0.465719	-0.0687821	0.15033	1.04162	0.93353	1.16222	0.907615
CST3	finngen_R11_M13_RHEUMA	Rheumatoid arthritis || id:finngen_R11_M13_RHEUMA	CST3++Cystatin_C	Weighted mode	3	0.0424351	0.0610313	0.55879	-0.0771862	0.162056	1.04335	0.925717	1.17593	0.976532
CST3	finngen_R11_M13_RHEUMA	Rheumatoid arthritis || id:finngen_R11_M13_RHEUMA	CST3++Cystatin_C	Maximum likelihood	3	0.0322779	0.0546816	0.554998	-0.0748981	0.139454	1.0328	0.927838	1.14965	0.92239
CST3	finngen_R11_M13_RHEUMA	Rheumatoid arthritis || id:finngen_R11_M13_RHEUMA	CST3++Cystatin_C	Simple mode	3	0.0283182	0.102197	0.80772	-0.171988	0.228624	1.02872	0.84199	1.25687	0.994896
TYRO3	finngen_R11_M13_RHEUMA	Rheumatoid arthritis || id:finngen_R11_M13_RHEUMA	TYRO3++Dtk_NA_Dtk	Wald ratio	1	-0.318788	0.123211	0.00967246	-0.560282	-0.0772934	0.72703	0.571048	0.925618	0.193536
ERBB3	finngen_R11_M13_RHEUMA	Rheumatoid arthritis || id:finngen_R11_M13_RHEUMA	ERBB3++ERBB3_NA_ERBB3	Wald ratio	1	0.192779	0.117478	0.100801	-0.0374774	0.423036	1.21262	0.963216	1.52659	0.541774
IL10RB	finngen_R11_M13_RHEUMA	Rheumatoid arthritis || id:finngen_R11_M13_RHEUMA	IL10RB++IL_10_Rb	Wald ratio	1	0.457234	0.173854	0.00853873	0.11648	0.797988	1.5797	1.12354	2.22107	0.193536
IL12RB1	finngen_R11_M13_RHEUMA	Rheumatoid arthritis || id:finngen_R11_M13_RHEUMA	IL12RB1++IL_12_Rb1	Wald ratio	1	0.109503	0.165805	0.508979	-0.215476	0.434481	1.11572	0.806158	1.54416	0.853226
LAYN	finngen_R11_M13_RHEUMA	Rheumatoid arthritis || id:finngen_R11_M13_RHEUMA	LAYN++Layilin_NA_Layilin	Wald ratio	1	0.0581205	0.252811	0.818172	-0.437389	0.553629	1.05984	0.645721	1.73956	0.944479
PRKCA	finngen_R11_M13_RHEUMA	Rheumatoid arthritis || id:finngen_R11_M13_RHEUMA	PRKCA++PKC_A	Inverse variance weighted	2	0.122664	0.184557	0.50628	-0.239067	0.484395	1.1305	0.787362	1.62319	0.990373
PRKCA	finngen_R11_M13_RHEUMA	Rheumatoid arthritis || id:finngen_R11_M13_RHEUMA	PRKCA++PKC_A	Maximum likelihood	2	0.124528	0.135062	0.356527	-0.140195	0.38925	1.13261	0.869189	1.47587	0.871795
GDI2	finngen_R11_M13_RHEUMA	Rheumatoid arthritis || id:finngen_R11_M13_RHEUMA	GDI2++Rab_GDP_dissociation_inhibitor_beta	Wald ratio	1	0.235549	0.134509	0.0799154	-0.0280885	0.499186	1.2656	0.972302	1.64738	0.541774
TNFRSF1A	finngen_R11_M13_RHEUMA	Rheumatoid arthritis || id:finngen_R11_M13_RHEUMA	TNFRSF1A++TNF_sR_I	Wald ratio	1	0.249681	0.138979	0.0724089	-0.0227176	0.52208	1.28362	0.977538	1.68553	0.523789
TNFRSF17	finngen_R11_M13_RHEUMA	Rheumatoid arthritis || id:finngen_R11_M13_RHEUMA	TNFRSF17++BCMA_NA_BCMA	Wald ratio	1	0.154648	0.0957044	0.106118	-0.0329328	0.342228	1.16725	0.967604	1.40808	0.542273
EGFR	finngen_R11_M13_RHEUMA	Rheumatoid arthritis || id:finngen_R11_M13_RHEUMA	EGFR++ERBB1_NA_ERBB1	Inverse variance weighted	3	0.0758691	0.0958466	0.428613	-0.11199	0.263728	1.07882	0.894053	1.30177	0.990373
EGFR	finngen_R11_M13_RHEUMA	Rheumatoid arthritis || id:finngen_R11_M13_RHEUMA	EGFR++ERBB1_NA_ERBB1	MR Egger	3	0.223716	0.437069	0.698824	-0.632939	1.08037	1.25072	0.531029	2.94577	0.999671
EGFR	finngen_R11_M13_RHEUMA	Rheumatoid arthritis || id:finngen_R11_M13_RHEUMA	EGFR++ERBB1_NA_ERBB1	Weighted median	3	0.0455966	0.101668	0.653804	-0.153673	0.244866	1.04665	0.857552	1.27745	0.969453
EGFR	finngen_R11_M13_RHEUMA	Rheumatoid arthritis || id:finngen_R11_M13_RHEUMA	EGFR++ERBB1_NA_ERBB1	Weighted mode	3	0.033257	0.12131	0.809691	-0.204511	0.271025	1.03382	0.815045	1.31131	0.984041
EGFR	finngen_R11_M13_RHEUMA	Rheumatoid arthritis || id:finngen_R11_M13_RHEUMA	EGFR++ERBB1_NA_ERBB1	Maximum likelihood	3	0.0760993	0.0961649	0.428745	-0.112384	0.264583	1.07907	0.893701	1.30289	0.891932
EGFR	finngen_R11_M13_RHEUMA	Rheumatoid arthritis || id:finngen_R11_M13_RHEUMA	EGFR++ERBB1_NA_ERBB1	Simple mode	3	0.0211712	0.135688	0.890337	-0.244778	0.28712	1.0214	0.782879	1.33258	0.994896
HGF	finngen_R11_M13_RHEUMA	Rheumatoid arthritis || id:finngen_R11_M13_RHEUMA	HGF++HGF_NA_HGF	Wald ratio	1	-0.117356	0.111221	0.291349	-0.335349	0.100636	0.889268	0.715089	1.10587	0.748778
C3	finngen_R11_M13_RHEUMA	Rheumatoid arthritis || id:finngen_R11_M13_RHEUMA	C3++iC3b_NA_iC3b	Wald ratio	1	-0.213951	0.190116	0.260434	-0.586579	0.158677	0.807388	0.556227	1.17196	0.722927
PF4	finngen_R11_M13_RHEUMA	Rheumatoid arthritis || id:finngen_R11_M13_RHEUMA	PF4++PF_4	Inverse variance weighted	2	-0.200049	0.109999	0.0689648	-0.415646	0.0155482	0.818691	0.659914	1.01567	0.714727
PF4	finngen_R11_M13_RHEUMA	Rheumatoid arthritis || id:finngen_R11_M13_RHEUMA	PF4++PF_4	Maximum likelihood	2	-0.201446	0.107746	0.0615352	-0.412628	0.00973702	0.817548	0.661908	1.00978	0.520611
PROS1	finngen_R11_M13_RHEUMA	Rheumatoid arthritis || id:finngen_R11_M13_RHEUMA	PROS1++Protein_S	Wald ratio	1	0.29909	0.266861	0.262385	-0.223957	0.822138	1.34863	0.799349	2.27536	0.722927
CCL25	finngen_R11_M13_RHEUMA	Rheumatoid arthritis || id:finngen_R11_M13_RHEUMA	CCL25++TECK_NA_TECK	Inverse variance weighted	5	0.00171787	0.0265362	0.948384	-0.0502932	0.0537289	1.00172	0.950951	1.0552	0.996145
CCL25	finngen_R11_M13_RHEUMA	Rheumatoid arthritis || id:finngen_R11_M13_RHEUMA	CCL25++TECK_NA_TECK	MR Egger	5	0.0359352	0.0448049	0.481183	-0.0518825	0.123753	1.03659	0.94944	1.13174	0.999671
CCL25	finngen_R11_M13_RHEUMA	Rheumatoid arthritis || id:finngen_R11_M13_RHEUMA	CCL25++TECK_NA_TECK	Weighted median	5	0.0130001	0.0279439	0.641773	-0.0417699	0.0677701	1.01308	0.95909	1.07012	0.969453
CCL25	finngen_R11_M13_RHEUMA	Rheumatoid arthritis || id:finngen_R11_M13_RHEUMA	CCL25++TECK_NA_TECK	Weighted mode	5	0.0143833	0.0282377	0.637311	-0.0409627	0.0697293	1.01449	0.959865	1.07222	0.9821
CCL25	finngen_R11_M13_RHEUMA	Rheumatoid arthritis || id:finngen_R11_M13_RHEUMA	CCL25++TECK_NA_TECK	Maximum likelihood	5	0.00171885	0.0265703	0.94842	-0.0503589	0.0537966	1.00172	0.950888	1.05527	0.988848
CCL25	finngen_R11_M13_RHEUMA	Rheumatoid arthritis || id:finngen_R11_M13_RHEUMA	CCL25++TECK_NA_TECK	Simple mode	5	0.0277894	0.071122	0.715915	-0.11161	0.167189	1.02818	0.894393	1.18198	0.994896
POR	finngen_R11_M13_RHEUMA	Rheumatoid arthritis || id:finngen_R11_M13_RHEUMA	POR++NADPH_P450_Oxidoreductase	Inverse variance weighted	2	0.0610813	0.064632	0.344627	-0.0655974	0.18776	1.06299	0.936508	1.20654	0.990373
POR	finngen_R11_M13_RHEUMA	Rheumatoid arthritis || id:finngen_R11_M13_RHEUMA	POR++NADPH_P450_Oxidoreductase	Maximum likelihood	2	0.061169	0.0647271	0.344644	-0.0656962	0.188034	1.06308	0.936415	1.20687	0.867419
SIGLEC7	finngen_R11_M13_RHEUMA	Rheumatoid arthritis || id:finngen_R11_M13_RHEUMA	SIGLEC7++Siglec_7	Inverse variance weighted	3	-0.0159732	0.0392357	0.683929	-0.0928752	0.0609289	0.984154	0.911307	1.06282	0.990373
SIGLEC7	finngen_R11_M13_RHEUMA	Rheumatoid arthritis || id:finngen_R11_M13_RHEUMA	SIGLEC7++Siglec_7	MR Egger	3	-0.00588895	0.0578796	0.935449	-0.119333	0.107555	0.994128	0.887512	1.11355	0.999671
SIGLEC7	finngen_R11_M13_RHEUMA	Rheumatoid arthritis || id:finngen_R11_M13_RHEUMA	SIGLEC7++Siglec_7	Weighted median	3	-0.0148977	0.0392364	0.704175	-0.0918011	0.0620056	0.985213	0.912287	1.06397	0.97421
SIGLEC7	finngen_R11_M13_RHEUMA	Rheumatoid arthritis || id:finngen_R11_M13_RHEUMA	SIGLEC7++Siglec_7	Weighted mode	3	-0.0142232	0.0423614	0.769004	-0.0972515	0.0688051	0.985877	0.907328	1.07123	0.984041
SIGLEC7	finngen_R11_M13_RHEUMA	Rheumatoid arthritis || id:finngen_R11_M13_RHEUMA	SIGLEC7++Siglec_7	Maximum likelihood	3	-0.0159734	0.0392381	0.683943	-0.0928802	0.0609333	0.984153	0.911303	1.06283	0.936449
SIGLEC7	finngen_R11_M13_RHEUMA	Rheumatoid arthritis || id:finngen_R11_M13_RHEUMA	SIGLEC7++Siglec_7	Simple mode	3	-0.0176056	0.0544291	0.777038	-0.124287	0.0890755	0.982548	0.883127	1.09316	0.994896
SHH	finngen_R11_M13_RHEUMA	Rheumatoid arthritis || id:finngen_R11_M13_RHEUMA	SHH++Sonic_Hedgehog	Inverse variance weighted	2	0.0575286	0.113943	0.613637	-0.1658	0.280857	1.05922	0.847216	1.32426	0.990373
SHH	finngen_R11_M13_RHEUMA	Rheumatoid arthritis || id:finngen_R11_M13_RHEUMA	SHH++Sonic_Hedgehog	Maximum likelihood	2	0.0576285	0.114128	0.613596	-0.166062	0.281319	1.05932	0.846994	1.32488	0.929591
C3	finngen_R11_M13_RHEUMA	Rheumatoid arthritis || id:finngen_R11_M13_RHEUMA	C3++C3_NA_C3	Wald ratio	1	-0.181119	0.160942	0.260434	-0.496565	0.134328	0.834336	0.608617	1.14377	0.722927
IGFBP1	finngen_R11_M13_RHEUMA	Rheumatoid arthritis || id:finngen_R11_M13_RHEUMA	IGFBP1++IGFBP_1	Inverse variance weighted	2	-0.0091283	0.148049	0.950836	-0.299303	0.281047	0.990913	0.741334	1.32452	0.996145
IGFBP1	finngen_R11_M13_RHEUMA	Rheumatoid arthritis || id:finngen_R11_M13_RHEUMA	IGFBP1++IGFBP_1	Maximum likelihood	2	-0.00915297	0.14829	0.950783	-0.299801	0.281495	0.990889	0.740966	1.32511	0.988848
IL22	finngen_R11_M13_RHEUMA	Rheumatoid arthritis || id:finngen_R11_M13_RHEUMA	IL22++IL_22	Wald ratio	1	-0.266307	0.276792	0.33599	-0.808819	0.276206	0.766204	0.445384	1.31812	0.772525
MMP7	finngen_R11_M13_RHEUMA	Rheumatoid arthritis || id:finngen_R11_M13_RHEUMA	MMP7++MMP_7	Inverse variance weighted	3	0.0376607	0.0385052	0.328041	-0.0378094	0.113131	1.03838	0.962896	1.11978	0.986973
MMP7	finngen_R11_M13_RHEUMA	Rheumatoid arthritis || id:finngen_R11_M13_RHEUMA	MMP7++MMP_7	MR Egger	3	0.048802	0.0679592	0.603529	-0.0843981	0.182002	1.05001	0.919065	1.19962	0.999671
MMP7	finngen_R11_M13_RHEUMA	Rheumatoid arthritis || id:finngen_R11_M13_RHEUMA	MMP7++MMP_7	Weighted median	3	0.0377257	0.0391625	0.335392	-0.0390329	0.114484	1.03845	0.961719	1.1213	0.88643
MMP7	finngen_R11_M13_RHEUMA	Rheumatoid arthritis || id:finngen_R11_M13_RHEUMA	MMP7++MMP_7	Weighted mode	3	0.0428521	0.0441587	0.434208	-0.0436989	0.129403	1.04378	0.957242	1.13815	0.976532
MMP7	finngen_R11_M13_RHEUMA	Rheumatoid arthritis || id:finngen_R11_M13_RHEUMA	MMP7++MMP_7	Maximum likelihood	3	0.0376628	0.0385209	0.328211	-0.0378382	0.113164	1.03838	0.962869	1.11982	0.855362
MMP7	finngen_R11_M13_RHEUMA	Rheumatoid arthritis || id:finngen_R11_M13_RHEUMA	MMP7++MMP_7	Simple mode	3	0.0212921	0.0585693	0.751035	-0.0935037	0.136088	1.02152	0.910735	1.14578	0.994896
APOB	finngen_R11_M13_RHEUMA	Rheumatoid arthritis || id:finngen_R11_M13_RHEUMA	APOB++Apo_B	Wald ratio	1	0.197035	0.179096	0.27126	-0.153993	0.548064	1.21779	0.857278	1.7299	0.722927
ANGPT1	finngen_R11_M13_RHEUMA	Rheumatoid arthritis || id:finngen_R11_M13_RHEUMA	ANGPT1++Angiopoietin_1	Wald ratio	1	0.0625882	0.187232	0.738167	-0.304386	0.429562	1.06459	0.737576	1.53658	0.935106
AGRP	finngen_R11_M13_RHEUMA	Rheumatoid arthritis || id:finngen_R11_M13_RHEUMA	AGRP++ART_NA_ART	Inverse variance weighted	2	0.0425483	0.134989	0.752611	-0.222029	0.307126	1.04347	0.800892	1.35951	0.990373
AGRP	finngen_R11_M13_RHEUMA	Rheumatoid arthritis || id:finngen_R11_M13_RHEUMA	AGRP++ART_NA_ART	Maximum likelihood	2	0.042843	0.0588491	0.466604	-0.0725012	0.158187	1.04377	0.930065	1.17139	0.902585
CDH5	finngen_R11_M13_RHEUMA	Rheumatoid arthritis || id:finngen_R11_M13_RHEUMA	CDH5++Cadherin_5	Inverse variance weighted	2	-0.0266318	0.0822311	0.74604	-0.187805	0.134541	0.97372	0.828777	1.14401	0.990373
CDH5	finngen_R11_M13_RHEUMA	Rheumatoid arthritis || id:finngen_R11_M13_RHEUMA	CDH5++Cadherin_5	Maximum likelihood	2	-0.0266657	0.0822885	0.745899	-0.187951	0.13462	0.973687	0.828655	1.1441	0.954751
CX3CL1	finngen_R11_M13_RHEUMA	Rheumatoid arthritis || id:finngen_R11_M13_RHEUMA	CX3CL1++Fractalkine_CX3CL_1	Wald ratio	1	0.0328532	0.08042	0.682891	-0.12477	0.190476	1.0334	0.8827	1.20983	0.921545
SPINT1	finngen_R11_M13_RHEUMA	Rheumatoid arthritis || id:finngen_R11_M13_RHEUMA	SPINT1++HAI_1	Inverse variance weighted	2	-0.0796388	0.127685	0.532815	-0.3299	0.170623	0.92345	0.718995	1.18604	0.990373
SPINT1	finngen_R11_M13_RHEUMA	Rheumatoid arthritis || id:finngen_R11_M13_RHEUMA	SPINT1++HAI_1	Maximum likelihood	2	-0.0798932	0.0941398	0.396067	-0.264407	0.104621	0.923215	0.767661	1.11029	0.890655
KLK11	finngen_R11_M13_RHEUMA	Rheumatoid arthritis || id:finngen_R11_M13_RHEUMA	KLK11++Kallikrein_11	Inverse variance weighted	6	0.0119147	0.0145019	0.411306	-0.016509	0.0403384	1.01199	0.983627	1.04116	0.990373
KLK11	finngen_R11_M13_RHEUMA	Rheumatoid arthritis || id:finngen_R11_M13_RHEUMA	KLK11++Kallikrein_11	MR Egger	6	0.0238856	0.0191949	0.281296	-0.0137364	0.0615077	1.02417	0.986357	1.06344	0.999671
KLK11	finngen_R11_M13_RHEUMA	Rheumatoid arthritis || id:finngen_R11_M13_RHEUMA	KLK11++Kallikrein_11	Weighted median	6	0.0140313	0.0145418	0.3346	-0.0144707	0.0425333	1.01413	0.985633	1.04345	0.88643
KLK11	finngen_R11_M13_RHEUMA	Rheumatoid arthritis || id:finngen_R11_M13_RHEUMA	KLK11++Kallikrein_11	Weighted mode	6	0.0165006	0.0149785	0.32081	-0.0128573	0.0458585	1.01664	0.987225	1.04693	0.976532
KLK11	finngen_R11_M13_RHEUMA	Rheumatoid arthritis || id:finngen_R11_M13_RHEUMA	KLK11++Kallikrein_11	Maximum likelihood	6	0.0119251	0.0145081	0.411101	-0.0165109	0.040361	1.012	0.983625	1.04119	0.890655
KLK11	finngen_R11_M13_RHEUMA	Rheumatoid arthritis || id:finngen_R11_M13_RHEUMA	KLK11++Kallikrein_11	Simple mode	6	0.0292575	0.0523985	0.600674	-0.0734435	0.131959	1.02969	0.929189	1.14106	0.994896
KLK8	finngen_R11_M13_RHEUMA	Rheumatoid arthritis || id:finngen_R11_M13_RHEUMA	KLK8++kallikrein_8	Inverse variance weighted	7	0.0639571	0.0456882	0.161556	-0.0255919	0.153506	1.06605	0.974733	1.16591	0.881192
KLK8	finngen_R11_M13_RHEUMA	Rheumatoid arthritis || id:finngen_R11_M13_RHEUMA	KLK8++kallikrein_8	MR Egger	7	0.134508	0.0898273	0.194549	-0.041553	0.31057	1.14397	0.959298	1.3642	0.999671
KLK8	finngen_R11_M13_RHEUMA	Rheumatoid arthritis || id:finngen_R11_M13_RHEUMA	KLK8++kallikrein_8	Weighted median	7	0.0749409	0.0532409	0.159255	-0.0294112	0.179293	1.07782	0.971017	1.19637	0.814013
KLK8	finngen_R11_M13_RHEUMA	Rheumatoid arthritis || id:finngen_R11_M13_RHEUMA	KLK8++kallikrein_8	Weighted mode	7	0.0770056	0.0543428	0.206244	-0.0295062	0.183517	1.08005	0.970925	1.20144	0.976532
KLK8	finngen_R11_M13_RHEUMA	Rheumatoid arthritis || id:finngen_R11_M13_RHEUMA	KLK8++kallikrein_8	Maximum likelihood	7	0.064088	0.0457014	0.16082	-0.0254868	0.153663	1.06619	0.974835	1.1661	0.698771
KLK8	finngen_R11_M13_RHEUMA	Rheumatoid arthritis || id:finngen_R11_M13_RHEUMA	KLK8++kallikrein_8	Simple mode	7	0.103927	0.0813571	0.248656	-0.0555331	0.263387	1.10952	0.945981	1.30133	0.994896
LCN2	finngen_R11_M13_RHEUMA	Rheumatoid arthritis || id:finngen_R11_M13_RHEUMA	LCN2++Lipocalin_2	Wald ratio	1	-0.0385664	0.151043	0.798466	-0.334612	0.257479	0.962168	0.715616	1.29366	0.94274
SPINT2	finngen_R11_M13_RHEUMA	Rheumatoid arthritis || id:finngen_R11_M13_RHEUMA	SPINT2++SPINT2_NA_SPINT2	Inverse variance weighted	8	-0.0743009	0.0255209	0.00359835	-0.124322	-0.02428	0.928392	0.883096	0.976012	0.24162
SPINT2	finngen_R11_M13_RHEUMA	Rheumatoid arthritis || id:finngen_R11_M13_RHEUMA	SPINT2++SPINT2_NA_SPINT2	MR Egger	8	-0.080413	0.0599233	0.228169	-0.197863	0.0370367	0.922735	0.820482	1.03773	0.999671
SPINT2	finngen_R11_M13_RHEUMA	Rheumatoid arthritis || id:finngen_R11_M13_RHEUMA	SPINT2++SPINT2_NA_SPINT2	Weighted median	8	-0.081791	0.028374	0.00394407	-0.137404	-0.0261779	0.921465	0.871618	0.974162	0.203516
SPINT2	finngen_R11_M13_RHEUMA	Rheumatoid arthritis || id:finngen_R11_M13_RHEUMA	SPINT2++SPINT2_NA_SPINT2	Weighted mode	8	-0.0831212	0.0283918	0.0220981	-0.138769	-0.0274733	0.92024	0.870429	0.972901	0.976532
SPINT2	finngen_R11_M13_RHEUMA	Rheumatoid arthritis || id:finngen_R11_M13_RHEUMA	SPINT2++SPINT2_NA_SPINT2	Maximum likelihood	8	-0.0749689	0.0256365	0.00345226	-0.125216	-0.0247214	0.927772	0.882306	0.975582	0.168268
SPINT2	finngen_R11_M13_RHEUMA	Rheumatoid arthritis || id:finngen_R11_M13_RHEUMA	SPINT2++SPINT2_NA_SPINT2	Simple mode	8	-0.060047	0.0542045	0.304562	-0.166288	0.0461939	0.94172	0.846802	1.04728	0.994896
TIE1	finngen_R11_M13_RHEUMA	Rheumatoid arthritis || id:finngen_R11_M13_RHEUMA	TIE1++sTie_1	Inverse variance weighted	4	0.0551075	0.0528434	0.297021	-0.0484657	0.158681	1.05665	0.95269	1.17196	0.986776
TIE1	finngen_R11_M13_RHEUMA	Rheumatoid arthritis || id:finngen_R11_M13_RHEUMA	TIE1++sTie_1	MR Egger	4	0.0800923	0.106088	0.529066	-0.127841	0.288025	1.08339	0.879994	1.33379	0.999671
TIE1	finngen_R11_M13_RHEUMA	Rheumatoid arthritis || id:finngen_R11_M13_RHEUMA	TIE1++sTie_1	Weighted median	4	0.0474151	0.0577492	0.411617	-0.0657734	0.160604	1.04856	0.936343	1.17422	0.88643
TIE1	finngen_R11_M13_RHEUMA	Rheumatoid arthritis || id:finngen_R11_M13_RHEUMA	TIE1++sTie_1	Weighted mode	4	0.0418378	0.0622652	0.549746	-0.080202	0.163878	1.04273	0.92293	1.17807	0.976532
TIE1	finngen_R11_M13_RHEUMA	Rheumatoid arthritis || id:finngen_R11_M13_RHEUMA	TIE1++sTie_1	Maximum likelihood	4	0.0551576	0.0528806	0.296921	-0.0484884	0.158804	1.05671	0.952668	1.17211	0.834962
TIE1	finngen_R11_M13_RHEUMA	Rheumatoid arthritis || id:finngen_R11_M13_RHEUMA	TIE1++sTie_1	Simple mode	4	0.0663347	0.0858744	0.496116	-0.101979	0.234648	1.06858	0.903048	1.26446	0.994896
C5	finngen_R11_M13_RHEUMA	Rheumatoid arthritis || id:finngen_R11_M13_RHEUMA	C5++C5a_NA_C5a	Inverse variance weighted	2	0.000530931	0.106712	0.99603	-0.208625	0.209687	1.00053	0.811699	1.23329	0.999726
C5	finngen_R11_M13_RHEUMA	Rheumatoid arthritis || id:finngen_R11_M13_RHEUMA	C5++C5a_NA_C5a	Maximum likelihood	2	0.000532521	0.106756	0.99602	-0.208709	0.209774	1.00053	0.811632	1.2334	0.99969
KPNA2	finngen_R11_M13_RHEUMA	Rheumatoid arthritis || id:finngen_R11_M13_RHEUMA	KPNA2++Karyopherin_a2	Wald ratio	1	0.499414	0.216621	0.0211401	0.0748368	0.923991	1.64776	1.07771	2.51933	0.261667
MAP2K1	finngen_R11_M13_RHEUMA	Rheumatoid arthritis || id:finngen_R11_M13_RHEUMA	MAP2K1++MEK1_NA_MEK1	Wald ratio	1	0.0648516	0.200498	0.746353	-0.328125	0.457828	1.067	0.720273	1.58064	0.935106
CCL28	finngen_R11_M13_RHEUMA	Rheumatoid arthritis || id:finngen_R11_M13_RHEUMA	CCL28++CCL28_NA_CCL28	Wald ratio	1	-0.248771	0.223878	0.266487	-0.687573	0.19003	0.779758	0.502795	1.20929	0.722927
CCL14	finngen_R11_M13_RHEUMA	Rheumatoid arthritis || id:finngen_R11_M13_RHEUMA	CCL14++HCC_1	Inverse variance weighted	6	0.0112704	0.0229156	0.622845	-0.0336442	0.056185	1.01133	0.966916	1.05779	0.990373
CCL14	finngen_R11_M13_RHEUMA	Rheumatoid arthritis || id:finngen_R11_M13_RHEUMA	CCL14++HCC_1	MR Egger	6	0.024419	0.0470676	0.631276	-0.0678335	0.116671	1.02472	0.934416	1.12375	0.999671
CCL14	finngen_R11_M13_RHEUMA	Rheumatoid arthritis || id:finngen_R11_M13_RHEUMA	CCL14++HCC_1	Weighted median	6	0.0151605	0.0250271	0.544672	-0.0338926	0.0642137	1.01528	0.966675	1.06632	0.931419
CCL14	finngen_R11_M13_RHEUMA	Rheumatoid arthritis || id:finngen_R11_M13_RHEUMA	CCL14++HCC_1	Weighted mode	6	0.0201434	0.0244582	0.447663	-0.0277946	0.0680814	1.02035	0.972588	1.07045	0.976532
CCL14	finngen_R11_M13_RHEUMA	Rheumatoid arthritis || id:finngen_R11_M13_RHEUMA	CCL14++HCC_1	Maximum likelihood	6	0.0112914	0.022922	0.622295	-0.0336358	0.0562186	1.01136	0.966924	1.05783	0.929849
CCL14	finngen_R11_M13_RHEUMA	Rheumatoid arthritis || id:finngen_R11_M13_RHEUMA	CCL14++HCC_1	Simple mode	6	0.0405361	0.0611999	0.537048	-0.0794157	0.160488	1.04137	0.923656	1.17408	0.994896
MDK	finngen_R11_M13_RHEUMA	Rheumatoid arthritis || id:finngen_R11_M13_RHEUMA	MDK++Midkine_NA_Midkine	Inverse variance weighted	2	0.107301	0.501408	0.830547	-0.875458	1.09006	1.11327	0.416671	2.97445	0.992378
MDK	finngen_R11_M13_RHEUMA	Rheumatoid arthritis || id:finngen_R11_M13_RHEUMA	MDK++Midkine_NA_Midkine	Maximum likelihood	2	0.113465	0.171991	0.509437	-0.223637	0.450567	1.12015	0.799605	1.5692	0.9072
CCL23	finngen_R11_M13_RHEUMA	Rheumatoid arthritis || id:finngen_R11_M13_RHEUMA	CCL23++MPIF_1	Inverse variance weighted	6	-0.0222255	0.0245286	0.36488	-0.0703016	0.0258506	0.97802	0.932113	1.02619	0.990373
CCL23	finngen_R11_M13_RHEUMA	Rheumatoid arthritis || id:finngen_R11_M13_RHEUMA	CCL23++MPIF_1	MR Egger	6	-0.0154743	0.0806124	0.857125	-0.173474	0.142526	0.984645	0.840739	1.15318	0.999671
CCL23	finngen_R11_M13_RHEUMA	Rheumatoid arthritis || id:finngen_R11_M13_RHEUMA	CCL23++MPIF_1	Weighted median	6	-0.0265606	0.0281829	0.345969	-0.0817992	0.0286779	0.973789	0.921457	1.02909	0.88643
CCL23	finngen_R11_M13_RHEUMA	Rheumatoid arthritis || id:finngen_R11_M13_RHEUMA	CCL23++MPIF_1	Weighted mode	6	-0.0245963	0.0292028	0.438062	-0.0818338	0.0326412	0.975704	0.921425	1.03318	0.976532
CCL23	finngen_R11_M13_RHEUMA	Rheumatoid arthritis || id:finngen_R11_M13_RHEUMA	CCL23++MPIF_1	Maximum likelihood	6	-0.0222801	0.0245942	0.364984	-0.0704848	0.0259245	0.977966	0.931942	1.02626	0.881959
CCL23	finngen_R11_M13_RHEUMA	Rheumatoid arthritis || id:finngen_R11_M13_RHEUMA	CCL23++MPIF_1	Simple mode	6	-0.0400711	0.0349351	0.303282	-0.108544	0.0284018	0.960721	0.897139	1.02881	0.994896
SERPINE1	finngen_R11_M13_RHEUMA	Rheumatoid arthritis || id:finngen_R11_M13_RHEUMA	SERPINE1++PAI_1	Wald ratio	1	-0.21083	0.203388	0.299929	-0.609471	0.187812	0.809912	0.543638	1.20661	0.753386
NBL1	finngen_R11_M13_RHEUMA	Rheumatoid arthritis || id:finngen_R11_M13_RHEUMA	NBL1++DAN_NA_DAN	Wald ratio	1	0.0868752	0.252093	0.730383	-0.407227	0.580978	1.09076	0.665493	1.78779	0.935106
CFD	finngen_R11_M13_RHEUMA	Rheumatoid arthritis || id:finngen_R11_M13_RHEUMA	CFD++Factor_D	Inverse variance weighted	5	0.014825	0.0850101	0.861558	-0.151795	0.181445	1.01494	0.859165	1.19895	0.992378
CFD	finngen_R11_M13_RHEUMA	Rheumatoid arthritis || id:finngen_R11_M13_RHEUMA	CFD++Factor_D	MR Egger	5	0.318256	0.260375	0.308869	-0.19208	0.828592	1.37473	0.825241	2.29009	0.999671
CFD	finngen_R11_M13_RHEUMA	Rheumatoid arthritis || id:finngen_R11_M13_RHEUMA	CFD++Factor_D	Weighted median	5	0.00861728	0.099245	0.930808	-0.185903	0.203137	1.00865	0.830354	1.22524	0.982685
CFD	finngen_R11_M13_RHEUMA	Rheumatoid arthritis || id:finngen_R11_M13_RHEUMA	CFD++Factor_D	Weighted mode	5	0.04491	0.108209	0.699416	-0.167181	0.257001	1.04593	0.846047	1.29305	0.9821
CFD	finngen_R11_M13_RHEUMA	Rheumatoid arthritis || id:finngen_R11_M13_RHEUMA	CFD++Factor_D	Maximum likelihood	5	0.0149445	0.0822661	0.85585	-0.146297	0.176186	1.01506	0.863901	1.19266	0.975865
CFD	finngen_R11_M13_RHEUMA	Rheumatoid arthritis || id:finngen_R11_M13_RHEUMA	CFD++Factor_D	Simple mode	5	0.118316	0.152517	0.481205	-0.180618	0.41725	1.1256	0.834754	1.51778	0.994896
GHR	finngen_R11_M13_RHEUMA	Rheumatoid arthritis || id:finngen_R11_M13_RHEUMA	GHR++Growth_hormone_receptor	Inverse variance weighted	3	-0.165407	0.0732456	0.0239301	-0.308968	-0.0218455	0.847549	0.734204	0.978391	0.515417
GHR	finngen_R11_M13_RHEUMA	Rheumatoid arthritis || id:finngen_R11_M13_RHEUMA	GHR++Growth_hormone_receptor	MR Egger	3	-0.38752	0.156985	0.245032	-0.69521	-0.0798302	0.678738	0.49897	0.923273	0.999671
GHR	finngen_R11_M13_RHEUMA	Rheumatoid arthritis || id:finngen_R11_M13_RHEUMA	GHR++Growth_hormone_receptor	Weighted median	3	-0.166942	0.0645535	0.00970684	-0.293467	-0.040417	0.846249	0.745674	0.960389	0.322713
GHR	finngen_R11_M13_RHEUMA	Rheumatoid arthritis || id:finngen_R11_M13_RHEUMA	GHR++Growth_hormone_receptor	Weighted mode	3	-0.180685	0.0671779	0.114893	-0.312354	-0.0490163	0.834698	0.731723	0.952166	0.976532
GHR	finngen_R11_M13_RHEUMA	Rheumatoid arthritis || id:finngen_R11_M13_RHEUMA	GHR++Growth_hormone_receptor	Maximum likelihood	3	-0.166147	0.0614967	0.00689815	-0.286681	-0.0456134	0.846922	0.750752	0.955411	0.220741
GHR	finngen_R11_M13_RHEUMA	Rheumatoid arthritis || id:finngen_R11_M13_RHEUMA	GHR++Growth_hormone_receptor	Simple mode	3	-0.237259	0.110936	0.16587	-0.454693	-0.0198246	0.788787	0.634643	0.980371	0.994896
IGFBP4	finngen_R11_M13_RHEUMA	Rheumatoid arthritis || id:finngen_R11_M13_RHEUMA	IGFBP4++IGFBP_4	Wald ratio	1	-0.242799	0.222565	0.275312	-0.679025	0.193428	0.78443	0.507111	1.2134	0.730231
PROC	finngen_R11_M13_RHEUMA	Rheumatoid arthritis || id:finngen_R11_M13_RHEUMA	PROC++Protein_C	Inverse variance weighted	3	-0.0663796	0.0817096	0.416572	-0.22653	0.0937713	0.935776	0.797295	1.09831	0.990373
PROC	finngen_R11_M13_RHEUMA	Rheumatoid arthritis || id:finngen_R11_M13_RHEUMA	PROC++Protein_C	MR Egger	3	-0.321856	0.878972	0.77654	-2.04464	1.40093	0.724803	0.129427	4.05897	0.999671
PROC	finngen_R11_M13_RHEUMA	Rheumatoid arthritis || id:finngen_R11_M13_RHEUMA	PROC++Protein_C	Weighted median	3	-0.0429619	0.0768735	0.576254	-0.193634	0.10771	0.957948	0.823959	1.11372	0.948514
PROC	finngen_R11_M13_RHEUMA	Rheumatoid arthritis || id:finngen_R11_M13_RHEUMA	PROC++Protein_C	Weighted mode	3	-0.0388054	0.0836308	0.688248	-0.202722	0.125111	0.961938	0.816505	1.13327	0.9821
PROC	finngen_R11_M13_RHEUMA	Rheumatoid arthritis || id:finngen_R11_M13_RHEUMA	PROC++Protein_C	Maximum likelihood	3	-0.0670248	0.0735824	0.362358	-0.211246	0.0771966	0.935172	0.809575	1.08025	0.880349
PROC	finngen_R11_M13_RHEUMA	Rheumatoid arthritis || id:finngen_R11_M13_RHEUMA	PROC++Protein_C	Simple mode	3	-0.0176881	0.0947972	0.869195	-0.203491	0.168114	0.982467	0.815878	1.18307	0.994896
PTHLH	finngen_R11_M13_RHEUMA	Rheumatoid arthritis || id:finngen_R11_M13_RHEUMA	PTHLH++PTHrP_NA_PTHrP	Inverse variance weighted	3	0.203982	0.0931054	0.0284613	0.0214952	0.386468	1.22628	1.02173	1.47177	0.540282
PTHLH	finngen_R11_M13_RHEUMA	Rheumatoid arthritis || id:finngen_R11_M13_RHEUMA	PTHLH++PTHrP_NA_PTHrP	MR Egger	3	0.346033	0.324951	0.480004	-0.290871	0.982938	1.41345	0.747612	2.6723	0.999671
PTHLH	finngen_R11_M13_RHEUMA	Rheumatoid arthritis || id:finngen_R11_M13_RHEUMA	PTHLH++PTHrP_NA_PTHrP	Weighted median	3	0.27056	0.10381	0.00915244	0.067093	0.474028	1.3107	1.06939	1.60645	0.322713
PTHLH	finngen_R11_M13_RHEUMA	Rheumatoid arthritis || id:finngen_R11_M13_RHEUMA	PTHLH++PTHrP_NA_PTHrP	Weighted mode	3	0.272585	0.125742	0.162464	0.0261309	0.51904	1.31336	1.02648	1.68041	0.976532
PTHLH	finngen_R11_M13_RHEUMA	Rheumatoid arthritis || id:finngen_R11_M13_RHEUMA	PTHLH++PTHrP_NA_PTHrP	Maximum likelihood	3	0.205476	0.0943036	0.0293411	0.0206406	0.390311	1.22811	1.02086	1.47744	0.395282
PTHLH	finngen_R11_M13_RHEUMA	Rheumatoid arthritis || id:finngen_R11_M13_RHEUMA	PTHLH++PTHrP_NA_PTHrP	Simple mode	3	0.270569	0.148549	0.210135	-0.020587	0.561725	1.31071	0.979623	1.7537	0.994896
TNFSF15	finngen_R11_M13_RHEUMA	Rheumatoid arthritis || id:finngen_R11_M13_RHEUMA	TNFSF15++TNFSF15_NA_TNFSF15	Wald ratio	1	-0.0384519	0.280962	0.891143	-0.589138	0.512234	0.962278	0.554805	1.66902	0.959083
BMP7	finngen_R11_M13_RHEUMA	Rheumatoid arthritis || id:finngen_R11_M13_RHEUMA	BMP7++BMP_7	Wald ratio	1	0.22829	0.226212	0.312885	-0.215085	0.671665	1.25645	0.806473	1.95749	0.756655
CXCL5	finngen_R11_M13_RHEUMA	Rheumatoid arthritis || id:finngen_R11_M13_RHEUMA	CXCL5++ENA_78	Wald ratio	1	-0.0262303	0.0989078	0.790856	-0.22009	0.167629	0.974111	0.802447	1.1825	0.94274
LGALS4	finngen_R11_M13_RHEUMA	Rheumatoid arthritis || id:finngen_R11_M13_RHEUMA	LGALS4++Galectin_4	Wald ratio	1	-0.401218	0.23048	0.0817205	-0.852959	0.0505238	0.669504	0.426152	1.05182	0.541774
CXCL1	finngen_R11_M13_RHEUMA	Rheumatoid arthritis || id:finngen_R11_M13_RHEUMA	CXCL1++Gro_a	Inverse variance weighted	9	-0.0365556	0.0351387	0.29819	-0.105427	0.0323162	0.964104	0.89994	1.03284	0.986776
CXCL1	finngen_R11_M13_RHEUMA	Rheumatoid arthritis || id:finngen_R11_M13_RHEUMA	CXCL1++Gro_a	MR Egger	9	-0.0678847	0.118138	0.583535	-0.299436	0.163667	0.934368	0.741236	1.17782	0.999671
CXCL1	finngen_R11_M13_RHEUMA	Rheumatoid arthritis || id:finngen_R11_M13_RHEUMA	CXCL1++Gro_a	Weighted median	9	-0.0486732	0.0346683	0.160329	-0.116623	0.0192767	0.952492	0.889921	1.01946	0.814013
CXCL1	finngen_R11_M13_RHEUMA	Rheumatoid arthritis || id:finngen_R11_M13_RHEUMA	CXCL1++Gro_a	Weighted mode	9	-0.0446098	0.0366032	0.257658	-0.116352	0.0271324	0.956371	0.890162	1.0275	0.976532
CXCL1	finngen_R11_M13_RHEUMA	Rheumatoid arthritis || id:finngen_R11_M13_RHEUMA	CXCL1++Gro_a	Maximum likelihood	9	-0.0367666	0.0310689	0.236655	-0.0976617	0.0241285	0.963901	0.906956	1.02442	0.7864
CXCL1	finngen_R11_M13_RHEUMA	Rheumatoid arthritis || id:finngen_R11_M13_RHEUMA	CXCL1++Gro_a	Simple mode	9	-0.0104614	0.0879883	0.90829	-0.182918	0.161996	0.989593	0.832836	1.17586	0.994896
IL1R1	finngen_R11_M13_RHEUMA	Rheumatoid arthritis || id:finngen_R11_M13_RHEUMA	IL1R1++IL_1_sRI	Inverse variance weighted	2	-0.106433	0.0665872	0.109952	-0.236944	0.0240774	0.899035	0.789035	1.02437	0.799653
IL1R1	finngen_R11_M13_RHEUMA	Rheumatoid arthritis || id:finngen_R11_M13_RHEUMA	IL1R1++IL_1_sRI	Maximum likelihood	2	-0.106464	0.0667563	0.110755	-0.237306	0.0243787	0.899008	0.78875	1.02468	0.620226
IL17RA	finngen_R11_M13_RHEUMA	Rheumatoid arthritis || id:finngen_R11_M13_RHEUMA	IL17RA++IL_17_sR	Inverse variance weighted	7	0.0336883	0.0235143	0.151952	-0.0123998	0.0797764	1.03426	0.987677	1.08304	0.87959
IL17RA	finngen_R11_M13_RHEUMA	Rheumatoid arthritis || id:finngen_R11_M13_RHEUMA	IL17RA++IL_17_sR	MR Egger	7	0.0224865	0.0644148	0.741243	-0.103767	0.148739	1.02274	0.901436	1.16037	0.999671
IL17RA	finngen_R11_M13_RHEUMA	Rheumatoid arthritis || id:finngen_R11_M13_RHEUMA	IL17RA++IL_17_sR	Weighted median	7	0.0154412	0.0256335	0.54692	-0.0348006	0.0656829	1.01556	0.965798	1.06789	0.931419
IL17RA	finngen_R11_M13_RHEUMA	Rheumatoid arthritis || id:finngen_R11_M13_RHEUMA	IL17RA++IL_17_sR	Weighted mode	7	0.0168472	0.0258183	0.538241	-0.0337566	0.0674509	1.01699	0.966807	1.06978	0.976532
IL17RA	finngen_R11_M13_RHEUMA	Rheumatoid arthritis || id:finngen_R11_M13_RHEUMA	IL17RA++IL_17_sR	Maximum likelihood	7	0.0337511	0.0200561	0.0924061	-0.00555875	0.073061	1.03433	0.994457	1.0758	0.599239
IL17RA	finngen_R11_M13_RHEUMA	Rheumatoid arthritis || id:finngen_R11_M13_RHEUMA	IL17RA++IL_17_sR	Simple mode	7	0.0530669	0.0437563	0.270792	-0.0326955	0.138829	1.0545	0.967833	1.14893	0.994896
IL18RAP	finngen_R11_M13_RHEUMA	Rheumatoid arthritis || id:finngen_R11_M13_RHEUMA	IL18RAP++IL_18_Rb	Wald ratio	1	0.147674	0.159491	0.354494	-0.164928	0.460276	1.15913	0.847954	1.58451	0.777232
IL1RL2	finngen_R11_M13_RHEUMA	Rheumatoid arthritis || id:finngen_R11_M13_RHEUMA	IL1RL2++IL_1Rrp2	Inverse variance weighted	3	0.165563	0.0702981	0.0185146	0.0277791	0.303348	1.18006	1.02817	1.35439	0.471281
IL1RL2	finngen_R11_M13_RHEUMA	Rheumatoid arthritis || id:finngen_R11_M13_RHEUMA	IL1RL2++IL_1Rrp2	MR Egger	3	0.319633	0.232081	0.39981	-0.135247	0.774513	1.37662	0.873501	2.16953	0.999671
IL1RL2	finngen_R11_M13_RHEUMA	Rheumatoid arthritis || id:finngen_R11_M13_RHEUMA	IL1RL2++IL_1Rrp2	Weighted median	3	0.150049	0.07357	0.0413966	0.00585144	0.294246	1.16189	1.00587	1.34211	0.511222
IL1RL2	finngen_R11_M13_RHEUMA	Rheumatoid arthritis || id:finngen_R11_M13_RHEUMA	IL1RL2++IL_1Rrp2	Weighted mode	3	0.148362	0.0809131	0.20816	-0.0102278	0.306952	1.15993	0.989824	1.35928	0.976532
IL1RL2	finngen_R11_M13_RHEUMA	Rheumatoid arthritis || id:finngen_R11_M13_RHEUMA	IL1RL2++IL_1Rrp2	Maximum likelihood	3	0.166257	0.0709812	0.0191667	0.0271342	0.305381	1.18088	1.02751	1.35714	0.351913
IL1RL2	finngen_R11_M13_RHEUMA	Rheumatoid arthritis || id:finngen_R11_M13_RHEUMA	IL1RL2++IL_1Rrp2	Simple mode	3	0.108689	0.110137	0.427743	-0.10718	0.324559	1.11482	0.898364	1.38342	0.994896
LSAMP	finngen_R11_M13_RHEUMA	Rheumatoid arthritis || id:finngen_R11_M13_RHEUMA	LSAMP++LSAMP_NA_LSAMP	Inverse variance weighted	4	-0.109467	0.100989	0.278389	-0.307405	0.088472	0.896312	0.735352	1.0925	0.982649
LSAMP	finngen_R11_M13_RHEUMA	Rheumatoid arthritis || id:finngen_R11_M13_RHEUMA	LSAMP++LSAMP_NA_LSAMP	MR Egger	4	-1.20021	1.54945	0.51961	-4.23713	1.8367	0.301129	0.014449	6.27579	0.999671
LSAMP	finngen_R11_M13_RHEUMA	Rheumatoid arthritis || id:finngen_R11_M13_RHEUMA	LSAMP++LSAMP_NA_LSAMP	Weighted median	4	-0.112754	0.069988	0.10717	-0.24993	0.0244228	0.893371	0.778855	1.02472	0.71668
LSAMP	finngen_R11_M13_RHEUMA	Rheumatoid arthritis || id:finngen_R11_M13_RHEUMA	LSAMP++LSAMP_NA_LSAMP	Weighted mode	4	-0.0670997	0.0703801	0.410728	-0.205045	0.0708454	0.935102	0.814611	1.07342	0.976532
LSAMP	finngen_R11_M13_RHEUMA	Rheumatoid arthritis || id:finngen_R11_M13_RHEUMA	LSAMP++LSAMP_NA_LSAMP	Maximum likelihood	4	-0.110961	0.0650115	0.0878619	-0.238383	0.0164619	0.894974	0.787901	1.0166	0.588445
LSAMP	finngen_R11_M13_RHEUMA	Rheumatoid arthritis || id:finngen_R11_M13_RHEUMA	LSAMP++LSAMP_NA_LSAMP	Simple mode	4	-0.354513	0.194877	0.16646	-0.736471	0.0274458	0.701515	0.478801	1.02783	0.994896
SIGLEC9	finngen_R11_M13_RHEUMA	Rheumatoid arthritis || id:finngen_R11_M13_RHEUMA	SIGLEC9++Siglec_9	Inverse variance weighted	6	-0.0347284	0.0191699	0.0700455	-0.0723013	0.0028445	0.965868	0.930251	1.00285	0.714727
SIGLEC9	finngen_R11_M13_RHEUMA	Rheumatoid arthritis || id:finngen_R11_M13_RHEUMA	SIGLEC9++Siglec_9	MR Egger	6	-0.0217582	0.0351051	0.568951	-0.0905642	0.0470478	0.978477	0.913416	1.04817	0.999671
SIGLEC9	finngen_R11_M13_RHEUMA	Rheumatoid arthritis || id:finngen_R11_M13_RHEUMA	SIGLEC9++Siglec_9	Weighted median	6	-0.0292727	0.0210387	0.164112	-0.0705085	0.0119631	0.971152	0.93192	1.01203	0.815841
SIGLEC9	finngen_R11_M13_RHEUMA	Rheumatoid arthritis || id:finngen_R11_M13_RHEUMA	SIGLEC9++Siglec_9	Weighted mode	6	-0.0278266	0.020388	0.230509	-0.0677871	0.0121338	0.972557	0.934459	1.01221	0.976532
SIGLEC9	finngen_R11_M13_RHEUMA	Rheumatoid arthritis || id:finngen_R11_M13_RHEUMA	SIGLEC9++Siglec_9	Maximum likelihood	6	-0.0347665	0.019179	0.0698719	-0.0723574	0.0028243	0.965831	0.930198	1.00283	0.533461
SIGLEC9	finngen_R11_M13_RHEUMA	Rheumatoid arthritis || id:finngen_R11_M13_RHEUMA	SIGLEC9++Siglec_9	Simple mode	6	-0.0251912	0.034565	0.49881	-0.0929387	0.0425563	0.975123	0.911249	1.04347	0.994896
TGFBR3	finngen_R11_M13_RHEUMA	Rheumatoid arthritis || id:finngen_R11_M13_RHEUMA	TGFBR3++TGF_b_R_III	Inverse variance weighted	2	-0.399976	0.111595	0.000338164	-0.618702	-0.181249	0.670336	0.538643	0.834228	0.0757488
TGFBR3	finngen_R11_M13_RHEUMA	Rheumatoid arthritis || id:finngen_R11_M13_RHEUMA	TGFBR3++TGF_b_R_III	Maximum likelihood	2	-0.402281	0.116498	0.000554132	-0.630616	-0.173946	0.668793	0.532264	0.840343	0.0775784
FGF2	finngen_R11_M13_RHEUMA	Rheumatoid arthritis || id:finngen_R11_M13_RHEUMA	FGF2++bFGF_NA_bFGF	Inverse variance weighted	3	0.0504105	0.0410321	0.219236	-0.0300125	0.130834	1.0517	0.970433	1.13978	0.927309
FGF2	finngen_R11_M13_RHEUMA	Rheumatoid arthritis || id:finngen_R11_M13_RHEUMA	FGF2++bFGF_NA_bFGF	MR Egger	3	0.0463271	0.0592214	0.577389	-0.0697469	0.162401	1.04742	0.93263	1.17633	0.999671
FGF2	finngen_R11_M13_RHEUMA	Rheumatoid arthritis || id:finngen_R11_M13_RHEUMA	FGF2++bFGF_NA_bFGF	Weighted median	3	0.0504202	0.0413785	0.223029	-0.0306816	0.131522	1.05171	0.969784	1.14056	0.834332
FGF2	finngen_R11_M13_RHEUMA	Rheumatoid arthritis || id:finngen_R11_M13_RHEUMA	FGF2++bFGF_NA_bFGF	Weighted mode	3	0.0500896	0.0402717	0.339587	-0.0288429	0.129022	1.05137	0.971569	1.13772	0.976532
FGF2	finngen_R11_M13_RHEUMA	Rheumatoid arthritis || id:finngen_R11_M13_RHEUMA	FGF2++bFGF_NA_bFGF	Maximum likelihood	3	0.05041	0.0410409	0.219339	-0.0300302	0.13085	1.0517	0.970416	1.1398	0.777909
FGF2	finngen_R11_M13_RHEUMA	Rheumatoid arthritis || id:finngen_R11_M13_RHEUMA	FGF2++bFGF_NA_bFGF	Simple mode	3	0.050366	0.0842172	0.61051	-0.1147	0.215432	1.05166	0.891634	1.2404	0.994896
LGALS2	finngen_R11_M13_RHEUMA	Rheumatoid arthritis || id:finngen_R11_M13_RHEUMA	LGALS2++Galectin_2	Inverse variance weighted	2	-0.0842851	0.0849612	0.321177	-0.250809	0.0822389	0.919169	0.778171	1.08572	0.986776
LGALS2	finngen_R11_M13_RHEUMA	Rheumatoid arthritis || id:finngen_R11_M13_RHEUMA	LGALS2++Galectin_2	Maximum likelihood	2	-0.0845265	0.0598652	0.157965	-0.201862	0.0328093	0.918947	0.817208	1.03335	0.693809
CXCL11	finngen_R11_M13_RHEUMA	Rheumatoid arthritis || id:finngen_R11_M13_RHEUMA	CXCL11++I_TAC	Inverse variance weighted	2	-0.00885098	0.0373615	0.812733	-0.0820795	0.0643775	0.991188	0.921199	1.06649	0.992378
CXCL11	finngen_R11_M13_RHEUMA	Rheumatoid arthritis || id:finngen_R11_M13_RHEUMA	CXCL11++I_TAC	Maximum likelihood	2	-0.00885071	0.0373624	0.812744	-0.0820811	0.0643796	0.991188	0.921197	1.0665	0.973773
CCL3	finngen_R11_M13_RHEUMA	Rheumatoid arthritis || id:finngen_R11_M13_RHEUMA	CCL3++MIP_1a	Inverse variance weighted	2	-0.020822	0.0373718	0.577419	-0.0940707	0.0524267	0.979393	0.910218	1.05383	0.990373
CCL3	finngen_R11_M13_RHEUMA	Rheumatoid arthritis || id:finngen_R11_M13_RHEUMA	CCL3++MIP_1a	Maximum likelihood	2	-0.0208231	0.0373773	0.577455	-0.0940826	0.0524364	0.979392	0.910208	1.05384	0.925963
SPARC	finngen_R11_M13_RHEUMA	Rheumatoid arthritis || id:finngen_R11_M13_RHEUMA	SPARC++ON_NA_ON	Wald ratio	1	0.0120595	0.534713	0.982007	-1.03598	1.0601	1.01213	0.354879	2.88665	0.994505
PTN	finngen_R11_M13_RHEUMA	Rheumatoid arthritis || id:finngen_R11_M13_RHEUMA	PTN++PTN_NA_PTN	Inverse variance weighted	3	-0.0390184	0.0587269	0.506432	-0.154123	0.0760863	0.961733	0.857166	1.07906	0.990373
PTN	finngen_R11_M13_RHEUMA	Rheumatoid arthritis || id:finngen_R11_M13_RHEUMA	PTN++PTN_NA_PTN	MR Egger	3	-0.690274	0.461988	0.375485	-1.59577	0.215223	0.501439	0.202752	1.24014	0.999671
PTN	finngen_R11_M13_RHEUMA	Rheumatoid arthritis || id:finngen_R11_M13_RHEUMA	PTN++PTN_NA_PTN	Weighted median	3	-0.0504503	0.056356	0.370677	-0.160908	0.0600075	0.950801	0.85137	1.06184	0.88643
PTN	finngen_R11_M13_RHEUMA	Rheumatoid arthritis || id:finngen_R11_M13_RHEUMA	PTN++PTN_NA_PTN	Weighted mode	3	-0.0500573	0.0596833	0.4899	-0.167037	0.066922	0.951175	0.846169	1.06921	0.976532
PTN	finngen_R11_M13_RHEUMA	Rheumatoid arthritis || id:finngen_R11_M13_RHEUMA	PTN++PTN_NA_PTN	Maximum likelihood	3	-0.0390826	0.0566063	0.489924	-0.150031	0.0718657	0.961671	0.860681	1.07451	0.9072
PTN	finngen_R11_M13_RHEUMA	Rheumatoid arthritis || id:finngen_R11_M13_RHEUMA	PTN++PTN_NA_PTN	Simple mode	3	-0.0575108	0.0730306	0.5135	-0.200651	0.0856291	0.944112	0.818198	1.0894	0.994896
PRSS1	finngen_R11_M13_RHEUMA	Rheumatoid arthritis || id:finngen_R11_M13_RHEUMA	PRSS1++Trypsin_NA_Trypsin	Wald ratio	1	-0.377478	0.261731	0.149236	-0.890472	0.135515	0.685588	0.410462	1.14513	0.624996
VWF	finngen_R11_M13_RHEUMA	Rheumatoid arthritis || id:finngen_R11_M13_RHEUMA	VWF++vWF_NA_vWF	Wald ratio	1	0.0596203	0.116995	0.610332	-0.169689	0.28893	1.06143	0.843927	1.335	0.885657
HP	finngen_R11_M13_RHEUMA	Rheumatoid arthritis || id:finngen_R11_M13_RHEUMA	HP++Haptoglobin__Mixed_Type	Inverse variance weighted	6	0.0169405	0.0232296	0.465841	-0.0285896	0.0624706	1.01708	0.971815	1.06446	0.990373
HP	finngen_R11_M13_RHEUMA	Rheumatoid arthritis || id:finngen_R11_M13_RHEUMA	HP++Haptoglobin__Mixed_Type	MR Egger	6	0.0395865	0.0576937	0.530324	-0.0734932	0.152666	1.04038	0.929142	1.16494	0.999671
HP	finngen_R11_M13_RHEUMA	Rheumatoid arthritis || id:finngen_R11_M13_RHEUMA	HP++Haptoglobin__Mixed_Type	Weighted median	6	0.0194874	0.0265703	0.463298	-0.0325904	0.0715651	1.01968	0.967935	1.07419	0.907615
HP	finngen_R11_M13_RHEUMA	Rheumatoid arthritis || id:finngen_R11_M13_RHEUMA	HP++Haptoglobin__Mixed_Type	Weighted mode	6	0.0190845	0.0275871	0.519872	-0.0349862	0.0731551	1.01927	0.965619	1.0759	0.976532
HP	finngen_R11_M13_RHEUMA	Rheumatoid arthritis || id:finngen_R11_M13_RHEUMA	HP++Haptoglobin__Mixed_Type	Maximum likelihood	6	0.0169327	0.0232333	0.466116	-0.0286045	0.0624699	1.01708	0.971801	1.06446	0.902585
HP	finngen_R11_M13_RHEUMA	Rheumatoid arthritis || id:finngen_R11_M13_RHEUMA	HP++Haptoglobin__Mixed_Type	Simple mode	6	0.0108073	0.0351342	0.770787	-0.0580557	0.0796703	1.01087	0.943597	1.08293	0.994896
TNFSF13B	finngen_R11_M13_RHEUMA	Rheumatoid arthritis || id:finngen_R11_M13_RHEUMA	TNFSF13B++BAFF_NA_BAFF	Inverse variance weighted	2	0.0962867	0.160297	0.548055	-0.217895	0.410468	1.10107	0.80421	1.50752	0.990373
TNFSF13B	finngen_R11_M13_RHEUMA	Rheumatoid arthritis || id:finngen_R11_M13_RHEUMA	TNFSF13B++BAFF_NA_BAFF	Maximum likelihood	2	0.0963586	0.16068	0.54871	-0.218573	0.411291	1.10115	0.803665	1.50876	0.92239
F10	finngen_R11_M13_RHEUMA	Rheumatoid arthritis || id:finngen_R11_M13_RHEUMA	F10++Coagulation_Factor_Xa	Inverse variance weighted	2	-0.103188	0.0879542	0.240716	-0.275578	0.0692025	0.901958	0.759133	1.07165	0.955051
F10	finngen_R11_M13_RHEUMA	Rheumatoid arthritis || id:finngen_R11_M13_RHEUMA	F10++Coagulation_Factor_Xa	Maximum likelihood	2	-0.103191	0.0882453	0.242258	-0.276151	0.0697702	0.901955	0.758698	1.07226	0.791309
RARRES2	finngen_R11_M13_RHEUMA	Rheumatoid arthritis || id:finngen_R11_M13_RHEUMA	RARRES2++TIG2_NA_TIG2	Inverse variance weighted	4	0.0757767	0.0752844	0.314156	-0.0717807	0.223334	1.07872	0.930735	1.25024	0.986776
RARRES2	finngen_R11_M13_RHEUMA	Rheumatoid arthritis || id:finngen_R11_M13_RHEUMA	RARRES2++TIG2_NA_TIG2	MR Egger	4	0.186708	0.142405	0.320132	-0.092406	0.465822	1.20528	0.911735	1.59332	0.999671
RARRES2	finngen_R11_M13_RHEUMA	Rheumatoid arthritis || id:finngen_R11_M13_RHEUMA	RARRES2++TIG2_NA_TIG2	Weighted median	4	0.0953027	0.0550994	0.0836927	-0.0126921	0.203298	1.09999	0.987388	1.22544	0.639067
RARRES2	finngen_R11_M13_RHEUMA	Rheumatoid arthritis || id:finngen_R11_M13_RHEUMA	RARRES2++TIG2_NA_TIG2	Weighted mode	4	0.106111	0.0558875	0.153834	-0.00342808	0.215651	1.11195	0.996578	1.24067	0.976532
RARRES2	finngen_R11_M13_RHEUMA	Rheumatoid arthritis || id:finngen_R11_M13_RHEUMA	RARRES2++TIG2_NA_TIG2	Maximum likelihood	4	0.0762444	0.0525005	0.146429	-0.0266566	0.179145	1.07923	0.973696	1.19619	0.6843
RARRES2	finngen_R11_M13_RHEUMA	Rheumatoid arthritis || id:finngen_R11_M13_RHEUMA	RARRES2++TIG2_NA_TIG2	Simple mode	4	0.0998876	0.123925	0.479194	-0.143005	0.34278	1.10505	0.86675	1.40886	0.994896
VEGFC	finngen_R11_M13_RHEUMA	Rheumatoid arthritis || id:finngen_R11_M13_RHEUMA	VEGFC++VEGF_C	Wald ratio	1	0.10642	0.065275	0.103031	-0.021519	0.234359	1.11229	0.978711	1.2641	0.541774
CD4	finngen_R11_M13_RHEUMA	Rheumatoid arthritis || id:finngen_R11_M13_RHEUMA	CD4++sCD4_NA_sCD4	Wald ratio	1	-0.413746	0.251924	0.100519	-0.907518	0.0800252	0.661169	0.403525	1.08331	0.541774
IL2RA	finngen_R11_M13_RHEUMA	Rheumatoid arthritis || id:finngen_R11_M13_RHEUMA	IL2RA++IL_2_sRa	Wald ratio	1	0.031811	0.163957	0.84616	-0.289545	0.353167	1.03232	0.748604	1.42357	0.946505
TNFRSF1B	finngen_R11_M13_RHEUMA	Rheumatoid arthritis || id:finngen_R11_M13_RHEUMA	TNFRSF1B++TNF_sR_II	Wald ratio	1	0.118472	0.171144	0.488788	-0.21697	0.453914	1.12578	0.804954	1.57446	0.853181
IDUA	finngen_R11_M13_RHEUMA	Rheumatoid arthritis || id:finngen_R11_M13_RHEUMA	IDUA++IDUA_NA_IDUA	Inverse variance weighted	3	0.039161	0.0398697	0.325989	-0.0389835	0.117306	1.03994	0.961767	1.12446	0.986776
IDUA	finngen_R11_M13_RHEUMA	Rheumatoid arthritis || id:finngen_R11_M13_RHEUMA	IDUA++IDUA_NA_IDUA	MR Egger	3	0.034107	0.127595	0.833715	-0.215978	0.284192	1.0347	0.805753	1.32869	0.999671
IDUA	finngen_R11_M13_RHEUMA	Rheumatoid arthritis || id:finngen_R11_M13_RHEUMA	IDUA++IDUA_NA_IDUA	Weighted median	3	0.0393842	0.0295339	0.18236	-0.0185023	0.0972707	1.04017	0.981668	1.10216	0.834332
IDUA	finngen_R11_M13_RHEUMA	Rheumatoid arthritis || id:finngen_R11_M13_RHEUMA	IDUA++IDUA_NA_IDUA	Weighted mode	3	0.08152	0.0369801	0.158315	0.00903907	0.154001	1.08493	1.00908	1.16649	0.976532
IDUA	finngen_R11_M13_RHEUMA	Rheumatoid arthritis || id:finngen_R11_M13_RHEUMA	IDUA++IDUA_NA_IDUA	Maximum likelihood	3	0.0391928	0.025092	0.118297	-0.00998758	0.0883731	1.03997	0.990062	1.0924	0.630917
IDUA	finngen_R11_M13_RHEUMA	Rheumatoid arthritis || id:finngen_R11_M13_RHEUMA	IDUA++IDUA_NA_IDUA	Simple mode	3	0.107076	0.0555287	0.19362	-0.00176003	0.215913	1.11302	0.998242	1.24099	0.994896
APP	finngen_R11_M13_RHEUMA	Rheumatoid arthritis || id:finngen_R11_M13_RHEUMA	APP++amyloid_precursor_protein	Wald ratio	1	0.000662132	0.168368	0.996862	-0.32934	0.330664	1.00066	0.719398	1.39189	0.999659
ARSB	finngen_R11_M13_RHEUMA	Rheumatoid arthritis || id:finngen_R11_M13_RHEUMA	ARSB++ARSB_NA_ARSB	Inverse variance weighted	2	0.0496764	0.0888838	0.576236	-0.124536	0.223889	1.05093	0.882907	1.25093	0.990373
ARSB	finngen_R11_M13_RHEUMA	Rheumatoid arthritis || id:finngen_R11_M13_RHEUMA	ARSB++ARSB_NA_ARSB	Maximum likelihood	2	0.0498118	0.08904	0.575867	-0.124707	0.22433	1.05107	0.882756	1.25148	0.925963
NAAA	finngen_R11_M13_RHEUMA	Rheumatoid arthritis || id:finngen_R11_M13_RHEUMA	NAAA++ASAHL_NA_ASAHL	Inverse variance weighted	4	0.0258485	0.0243274	0.287998	-0.0218333	0.0735303	1.02619	0.978403	1.0763	0.986776
NAAA	finngen_R11_M13_RHEUMA	Rheumatoid arthritis || id:finngen_R11_M13_RHEUMA	NAAA++ASAHL_NA_ASAHL	MR Egger	4	0.0318093	0.0603135	0.65058	-0.0864051	0.150024	1.03232	0.917223	1.16186	0.999671
NAAA	finngen_R11_M13_RHEUMA	Rheumatoid arthritis || id:finngen_R11_M13_RHEUMA	NAAA++ASAHL_NA_ASAHL	Weighted median	4	0.0266486	0.0257976	0.301609	-0.0239147	0.0772119	1.02701	0.976369	1.08027	0.88365
NAAA	finngen_R11_M13_RHEUMA	Rheumatoid arthritis || id:finngen_R11_M13_RHEUMA	NAAA++ASAHL_NA_ASAHL	Weighted mode	4	0.0292453	0.0267052	0.353511	-0.0230969	0.0815876	1.02968	0.977168	1.08501	0.976532
NAAA	finngen_R11_M13_RHEUMA	Rheumatoid arthritis || id:finngen_R11_M13_RHEUMA	NAAA++ASAHL_NA_ASAHL	Maximum likelihood	4	0.0258492	0.0243304	0.288044	-0.0218385	0.0735368	1.02619	0.978398	1.07631	0.830031
NAAA	finngen_R11_M13_RHEUMA	Rheumatoid arthritis || id:finngen_R11_M13_RHEUMA	NAAA++ASAHL_NA_ASAHL	Simple mode	4	0.0292453	0.0412761	0.52971	-0.0516558	0.110146	1.02968	0.949656	1.11644	0.994896
ADAMTS13	finngen_R11_M13_RHEUMA	Rheumatoid arthritis || id:finngen_R11_M13_RHEUMA	ADAMTS13++ATS13_NA_ATS13	Inverse variance weighted	10	0.0687436	0.0213	0.00124923	0.0269955	0.110492	1.07116	1.02736	1.11683	0.174892
ADAMTS13	finngen_R11_M13_RHEUMA	Rheumatoid arthritis || id:finngen_R11_M13_RHEUMA	ADAMTS13++ATS13_NA_ATS13	MR Egger	10	0.0757543	0.0393937	0.090694	-0.00145732	0.152966	1.0787	0.998544	1.16529	0.999671
ADAMTS13	finngen_R11_M13_RHEUMA	Rheumatoid arthritis || id:finngen_R11_M13_RHEUMA	ADAMTS13++ATS13_NA_ATS13	Weighted median	10	0.074379	0.0232256	0.00136256	0.028857	0.119901	1.07722	1.02928	1.12739	0.172147
ADAMTS13	finngen_R11_M13_RHEUMA	Rheumatoid arthritis || id:finngen_R11_M13_RHEUMA	ADAMTS13++ATS13_NA_ATS13	Weighted mode	10	0.0753745	0.022908	0.00937373	0.0304747	0.120274	1.07829	1.03094	1.12781	0.976532
ADAMTS13	finngen_R11_M13_RHEUMA	Rheumatoid arthritis || id:finngen_R11_M13_RHEUMA	ADAMTS13++ATS13_NA_ATS13	Maximum likelihood	10	0.0688267	0.0213224	0.00124701	0.0270348	0.110619	1.07125	1.0274	1.11697	0.139665
ADAMTS13	finngen_R11_M13_RHEUMA	Rheumatoid arthritis || id:finngen_R11_M13_RHEUMA	ADAMTS13++ATS13_NA_ATS13	Simple mode	10	0.0753745	0.0345909	0.0572654	0.00757628	0.143173	1.07829	1.00761	1.15393	0.994896
F7	finngen_R11_M13_RHEUMA	Rheumatoid arthritis || id:finngen_R11_M13_RHEUMA	F7++Coagulation_Factor_VII	Inverse variance weighted	7	-0.038364	0.0255996	0.133973	-0.0885392	0.0118112	0.962363	0.915267	1.01188	0.838508
F7	finngen_R11_M13_RHEUMA	Rheumatoid arthritis || id:finngen_R11_M13_RHEUMA	F7++Coagulation_Factor_VII	MR Egger	7	-0.0356111	0.0642102	0.603059	-0.161463	0.0902409	0.965015	0.850898	1.09444	0.999671
F7	finngen_R11_M13_RHEUMA	Rheumatoid arthritis || id:finngen_R11_M13_RHEUMA	F7++Coagulation_Factor_VII	Weighted median	7	-0.0372835	0.0319102	0.242651	-0.0998276	0.0252606	0.963403	0.904993	1.02558	0.84593
F7	finngen_R11_M13_RHEUMA	Rheumatoid arthritis || id:finngen_R11_M13_RHEUMA	F7++Coagulation_Factor_VII	Weighted mode	7	-0.0376821	0.030191	0.258483	-0.0968565	0.0214922	0.963019	0.907686	1.02172	0.976532
F7	finngen_R11_M13_RHEUMA	Rheumatoid arthritis || id:finngen_R11_M13_RHEUMA	F7++Coagulation_Factor_VII	Maximum likelihood	7	-0.0384919	0.0251303	0.125599	-0.0877473	0.0107636	0.96224	0.915992	1.01082	0.653094
F7	finngen_R11_M13_RHEUMA	Rheumatoid arthritis || id:finngen_R11_M13_RHEUMA	F7++Coagulation_Factor_VII	Simple mode	7	-0.0203758	0.0559205	0.728078	-0.12998	0.0892283	0.97983	0.878113	1.09333	0.994896
WFIKKN1	finngen_R11_M13_RHEUMA	Rheumatoid arthritis || id:finngen_R11_M13_RHEUMA	WFIKKN1++WFKN1_NA_WFKN1	Inverse variance weighted	2	0.130264	0.0773023	0.0919646	-0.0212485	0.281777	1.13913	0.978976	1.32548	0.778628
WFIKKN1	finngen_R11_M13_RHEUMA	Rheumatoid arthritis || id:finngen_R11_M13_RHEUMA	WFIKKN1++WFKN1_NA_WFKN1	Maximum likelihood	2	0.130338	0.0775856	0.0929713	-0.0217295	0.282406	1.13921	0.978505	1.32632	0.599239
GP6	finngen_R11_M13_RHEUMA	Rheumatoid arthritis || id:finngen_R11_M13_RHEUMA	GP6++GPVI_NA_GPVI	Inverse variance weighted	3	0.0574373	0.0663636	0.386768	-0.0726353	0.18751	1.05912	0.92994	1.20624	0.990373
GP6	finngen_R11_M13_RHEUMA	Rheumatoid arthritis || id:finngen_R11_M13_RHEUMA	GP6++GPVI_NA_GPVI	MR Egger	3	0.138456	0.130125	0.480261	-0.11659	0.393501	1.1485	0.88995	1.48216	0.999671
GP6	finngen_R11_M13_RHEUMA	Rheumatoid arthritis || id:finngen_R11_M13_RHEUMA	GP6++GPVI_NA_GPVI	Weighted median	3	0.0602895	0.049422	0.222505	-0.0365775	0.157157	1.06214	0.964083	1.17018	0.834332
GP6	finngen_R11_M13_RHEUMA	Rheumatoid arthritis || id:finngen_R11_M13_RHEUMA	GP6++GPVI_NA_GPVI	Weighted mode	3	0.0678433	0.0493047	0.302642	-0.0287938	0.16448	1.0702	0.971617	1.17878	0.976532
GP6	finngen_R11_M13_RHEUMA	Rheumatoid arthritis || id:finngen_R11_M13_RHEUMA	GP6++GPVI_NA_GPVI	Maximum likelihood	3	0.0576316	0.0487024	0.236673	-0.037825	0.153088	1.05932	0.962881	1.16543	0.7864
GP6	finngen_R11_M13_RHEUMA	Rheumatoid arthritis || id:finngen_R11_M13_RHEUMA	GP6++GPVI_NA_GPVI	Simple mode	3	0.145299	0.124524	0.363582	-0.0987685	0.389367	1.15639	0.905952	1.47605	0.994896
KLK12	finngen_R11_M13_RHEUMA	Rheumatoid arthritis || id:finngen_R11_M13_RHEUMA	KLK12++kallikrein_12	Wald ratio	1	-0.0466843	0.0887666	0.598942	-0.220667	0.127298	0.954389	0.801984	1.13576	0.885657
LYVE1	finngen_R11_M13_RHEUMA	Rheumatoid arthritis || id:finngen_R11_M13_RHEUMA	LYVE1++LYVE1_NA_LYVE1	Inverse variance weighted	5	-0.0412772	0.0336234	0.219585	-0.107179	0.0246247	0.959563	0.898365	1.02493	0.927309
LYVE1	finngen_R11_M13_RHEUMA	Rheumatoid arthritis || id:finngen_R11_M13_RHEUMA	LYVE1++LYVE1_NA_LYVE1	MR Egger	5	-0.155638	0.0888981	0.178291	-0.329878	0.0186021	0.855869	0.719011	1.01878	0.999671
LYVE1	finngen_R11_M13_RHEUMA	Rheumatoid arthritis || id:finngen_R11_M13_RHEUMA	LYVE1++LYVE1_NA_LYVE1	Weighted median	5	-0.0484099	0.0382838	0.20605	-0.123446	0.0266263	0.952743	0.883869	1.02698	0.834332
LYVE1	finngen_R11_M13_RHEUMA	Rheumatoid arthritis || id:finngen_R11_M13_RHEUMA	LYVE1++LYVE1_NA_LYVE1	Weighted mode	5	-0.0517059	0.0400009	0.265755	-0.130108	0.0266959	0.949608	0.878001	1.02706	0.976532
LYVE1	finngen_R11_M13_RHEUMA	Rheumatoid arthritis || id:finngen_R11_M13_RHEUMA	LYVE1++LYVE1_NA_LYVE1	Maximum likelihood	5	-0.0413142	0.0336076	0.218954	-0.107185	0.0245566	0.959528	0.898359	1.02486	0.777909
LYVE1	finngen_R11_M13_RHEUMA	Rheumatoid arthritis || id:finngen_R11_M13_RHEUMA	LYVE1++LYVE1_NA_LYVE1	Simple mode	5	-0.0502941	0.0543974	0.407518	-0.156913	0.0563248	0.95095	0.854778	1.05794	0.994896
METAP1	finngen_R11_M13_RHEUMA	Rheumatoid arthritis || id:finngen_R11_M13_RHEUMA	METAP1++METAP1_NA_METAP1	Wald ratio	1	0.0975464	0.189728	0.607156	-0.274321	0.469414	1.10246	0.760088	1.59906	0.885657
NID1	finngen_R11_M13_RHEUMA	Rheumatoid arthritis || id:finngen_R11_M13_RHEUMA	NID1++Nidogen_NA_Nidogen	Inverse variance weighted	4	-0.0400915	0.0645273	0.534395	-0.166565	0.0863821	0.960701	0.846568	1.09022	0.990373
NID1	finngen_R11_M13_RHEUMA	Rheumatoid arthritis || id:finngen_R11_M13_RHEUMA	NID1++Nidogen_NA_Nidogen	MR Egger	4	-0.0659951	0.110588	0.611219	-0.282747	0.150757	0.936135	0.753711	1.16271	0.999671
NID1	finngen_R11_M13_RHEUMA	Rheumatoid arthritis || id:finngen_R11_M13_RHEUMA	NID1++Nidogen_NA_Nidogen	Weighted median	4	-0.0148898	0.0671495	0.824515	-0.146503	0.116723	0.985221	0.863723	1.12381	0.982685
NID1	finngen_R11_M13_RHEUMA	Rheumatoid arthritis || id:finngen_R11_M13_RHEUMA	NID1++Nidogen_NA_Nidogen	Weighted mode	4	-0.00605445	0.0708594	0.937292	-0.144939	0.13283	0.993964	0.865075	1.14206	0.984041
NID1	finngen_R11_M13_RHEUMA	Rheumatoid arthritis || id:finngen_R11_M13_RHEUMA	NID1++Nidogen_NA_Nidogen	Maximum likelihood	4	-0.0403299	0.0629278	0.521593	-0.163668	0.0830086	0.960473	0.849024	1.08655	0.914216
NID1	finngen_R11_M13_RHEUMA	Rheumatoid arthritis || id:finngen_R11_M13_RHEUMA	NID1++Nidogen_NA_Nidogen	Simple mode	4	-0.287953	0.117948	0.0923888	-0.519131	-0.0567745	0.749797	0.595037	0.944807	0.994896
PIGR	finngen_R11_M13_RHEUMA	Rheumatoid arthritis || id:finngen_R11_M13_RHEUMA	PIGR++PIGR_NA_PIGR	Wald ratio	1	-0.166711	0.0879831	0.0581178	-0.339158	0.00573577	0.846444	0.71237	1.00575	0.455938
RET	finngen_R11_M13_RHEUMA	Rheumatoid arthritis || id:finngen_R11_M13_RHEUMA	RET++RET_NA_RET	Inverse variance weighted	3	0.0683145	0.0343012	0.0464145	0.00108408	0.135545	1.0707	1.00108	1.14516	0.682376
RET	finngen_R11_M13_RHEUMA	Rheumatoid arthritis || id:finngen_R11_M13_RHEUMA	RET++RET_NA_RET	MR Egger	3	0.0827466	0.0702103	0.447939	-0.0548655	0.220359	1.08627	0.946612	1.24652	0.999671
RET	finngen_R11_M13_RHEUMA	Rheumatoid arthritis || id:finngen_R11_M13_RHEUMA	RET++RET_NA_RET	Weighted median	3	0.0695176	0.0347803	0.0456337	0.00134829	0.137687	1.07199	1.00135	1.14762	0.521619
RET	finngen_R11_M13_RHEUMA	Rheumatoid arthritis || id:finngen_R11_M13_RHEUMA	RET++RET_NA_RET	Weighted mode	3	0.0754913	0.0357053	0.168802	0.00550885	0.145474	1.07841	1.00552	1.15659	0.976532
RET	finngen_R11_M13_RHEUMA	Rheumatoid arthritis || id:finngen_R11_M13_RHEUMA	RET++RET_NA_RET	Maximum likelihood	3	0.0683207	0.0343422	0.0466562	0.00100994	0.135631	1.07071	1.00101	1.14526	0.502451
RET	finngen_R11_M13_RHEUMA	Rheumatoid arthritis || id:finngen_R11_M13_RHEUMA	RET++RET_NA_RET	Simple mode	3	0.0782425	0.0498087	0.256809	-0.0193825	0.175868	1.08138	0.980804	1.19228	0.994896
CCDC80	finngen_R11_M13_RHEUMA	Rheumatoid arthritis || id:finngen_R11_M13_RHEUMA	CCDC80++URB_NA_URB	Inverse variance weighted	2	0.100959	0.118164	0.392888	-0.130643	0.332561	1.10623	0.877531	1.39453	0.990373
CCDC80	finngen_R11_M13_RHEUMA	Rheumatoid arthritis || id:finngen_R11_M13_RHEUMA	CCDC80++URB_NA_URB	Maximum likelihood	2	0.100984	0.118429	0.393828	-0.131137	0.333104	1.10626	0.877098	1.39529	0.890655
WFIKKN2	finngen_R11_M13_RHEUMA	Rheumatoid arthritis || id:finngen_R11_M13_RHEUMA	WFIKKN2++WFKN2_NA_WFKN2	Inverse variance weighted	7	0.0481998	0.0298901	0.106839	-0.0103848	0.106784	1.04938	0.989669	1.11269	0.797728
WFIKKN2	finngen_R11_M13_RHEUMA	Rheumatoid arthritis || id:finngen_R11_M13_RHEUMA	WFIKKN2++WFKN2_NA_WFKN2	MR Egger	7	0.0576577	0.0499544	0.300583	-0.0402529	0.155568	1.05935	0.960547	1.16832	0.999671
WFIKKN2	finngen_R11_M13_RHEUMA	Rheumatoid arthritis || id:finngen_R11_M13_RHEUMA	WFIKKN2++WFKN2_NA_WFKN2	Weighted median	7	0.0475893	0.0321746	0.139114	-0.0154728	0.110651	1.04874	0.984646	1.11701	0.804671
WFIKKN2	finngen_R11_M13_RHEUMA	Rheumatoid arthritis || id:finngen_R11_M13_RHEUMA	WFIKKN2++WFKN2_NA_WFKN2	Weighted mode	7	0.0510455	0.0347099	0.191795	-0.016986	0.119077	1.05237	0.983157	1.12646	0.976532
WFIKKN2	finngen_R11_M13_RHEUMA	Rheumatoid arthritis || id:finngen_R11_M13_RHEUMA	WFIKKN2++WFKN2_NA_WFKN2	Maximum likelihood	7	0.0482719	0.02993	0.106782	-0.010391	0.106935	1.04946	0.989663	1.11286	0.613379
WFIKKN2	finngen_R11_M13_RHEUMA	Rheumatoid arthritis || id:finngen_R11_M13_RHEUMA	WFIKKN2++WFKN2_NA_WFKN2	Simple mode	7	0.0986395	0.0646156	0.177723	-0.0280071	0.225286	1.10367	0.972381	1.25268	0.994896
ACAN	finngen_R11_M13_RHEUMA	Rheumatoid arthritis || id:finngen_R11_M13_RHEUMA	ACAN++Aggrecan_NA_Aggrecan	Inverse variance weighted	2	0.209882	0.160209	0.19018	-0.104128	0.523892	1.23353	0.90111	1.68859	0.927309
ACAN	finngen_R11_M13_RHEUMA	Rheumatoid arthritis || id:finngen_R11_M13_RHEUMA	ACAN++Aggrecan_NA_Aggrecan	Maximum likelihood	2	0.211247	0.112147	0.0596103	-0.00856074	0.431055	1.23522	0.991476	1.53888	0.516226
TGFBI	finngen_R11_M13_RHEUMA	Rheumatoid arthritis || id:finngen_R11_M13_RHEUMA	TGFBI++BGH3_NA_BGH3	Inverse variance weighted	5	0.105565	0.0316722	0.000859013	0.0434873	0.167642	1.11134	1.04445	1.18251	0.137442
TGFBI	finngen_R11_M13_RHEUMA	Rheumatoid arthritis || id:finngen_R11_M13_RHEUMA	TGFBI++BGH3_NA_BGH3	MR Egger	5	0.0613811	0.0555418	0.349772	-0.0474809	0.170243	1.0633	0.953629	1.18559	0.999671
TGFBI	finngen_R11_M13_RHEUMA	Rheumatoid arthritis || id:finngen_R11_M13_RHEUMA	TGFBI++BGH3_NA_BGH3	Weighted median	5	0.0969688	0.0276129	0.00044522	0.0428475	0.15109	1.10183	1.04378	1.1631	0.091604
TGFBI	finngen_R11_M13_RHEUMA	Rheumatoid arthritis || id:finngen_R11_M13_RHEUMA	TGFBI++BGH3_NA_BGH3	Weighted mode	5	0.0944722	0.0260856	0.0223249	0.0433445	0.1456	1.09908	1.0443	1.15673	0.976532
TGFBI	finngen_R11_M13_RHEUMA	Rheumatoid arthritis || id:finngen_R11_M13_RHEUMA	TGFBI++BGH3_NA_BGH3	Maximum likelihood	5	0.105692	0.0274179	0.000115805	0.0519526	0.159431	1.11148	1.05333	1.17284	0.0247148
TGFBI	finngen_R11_M13_RHEUMA	Rheumatoid arthritis || id:finngen_R11_M13_RHEUMA	TGFBI++BGH3_NA_BGH3	Simple mode	5	0.152195	0.0750301	0.112411	0.00513578	0.299254	1.16439	1.00515	1.34885	0.994896
C1R	finngen_R11_M13_RHEUMA	Rheumatoid arthritis || id:finngen_R11_M13_RHEUMA	C1R++C1r_NA_C1r	Inverse variance weighted	2	-0.171895	0.158743	0.278876	-0.483032	0.139242	0.842068	0.61691	1.1494	0.982649
C1R	finngen_R11_M13_RHEUMA	Rheumatoid arthritis || id:finngen_R11_M13_RHEUMA	C1R++C1r_NA_C1r	Maximum likelihood	2	-0.172494	0.159033	0.278078	-0.484199	0.13921	0.841563	0.616191	1.14937	0.823737
FCER2	finngen_R11_M13_RHEUMA	Rheumatoid arthritis || id:finngen_R11_M13_RHEUMA	FCER2++CD23_NA_CD23	Inverse variance weighted	7	-0.0386114	0.0313375	0.217907	-0.100033	0.0228102	0.962125	0.904808	1.02307	0.927309
FCER2	finngen_R11_M13_RHEUMA	Rheumatoid arthritis || id:finngen_R11_M13_RHEUMA	FCER2++CD23_NA_CD23	MR Egger	7	-0.0103929	0.0777558	0.898884	-0.162794	0.142008	0.989661	0.849766	1.15259	0.999671
FCER2	finngen_R11_M13_RHEUMA	Rheumatoid arthritis || id:finngen_R11_M13_RHEUMA	FCER2++CD23_NA_CD23	Weighted median	7	-0.0465471	0.0374801	0.214268	-0.120008	0.0269139	0.95452	0.886913	1.02728	0.834332
FCER2	finngen_R11_M13_RHEUMA	Rheumatoid arthritis || id:finngen_R11_M13_RHEUMA	FCER2++CD23_NA_CD23	Weighted mode	7	-0.0468619	0.0352229	0.231704	-0.115899	0.0221749	0.954219	0.890565	1.02242	0.976532
FCER2	finngen_R11_M13_RHEUMA	Rheumatoid arthritis || id:finngen_R11_M13_RHEUMA	FCER2++CD23_NA_CD23	Maximum likelihood	7	-0.0386589	0.031359	0.217657	-0.100123	0.0228048	0.962079	0.904727	1.02307	0.777909
FCER2	finngen_R11_M13_RHEUMA	Rheumatoid arthritis || id:finngen_R11_M13_RHEUMA	FCER2++CD23_NA_CD23	Simple mode	7	-0.0538386	0.0604196	0.407198	-0.172261	0.0645838	0.947585	0.841759	1.06672	0.994896
CD48	finngen_R11_M13_RHEUMA	Rheumatoid arthritis || id:finngen_R11_M13_RHEUMA	CD48++CD48_NA_CD48	Inverse variance weighted	4	-0.0897181	0.044951	0.045944	-0.177822	-0.00161409	0.914189	0.837091	0.998387	0.682376
CD48	finngen_R11_M13_RHEUMA	Rheumatoid arthritis || id:finngen_R11_M13_RHEUMA	CD48++CD48_NA_CD48	MR Egger	4	-0.0766894	0.0803795	0.44073	-0.234233	0.0808544	0.926177	0.791177	1.08421	0.999671
CD48	finngen_R11_M13_RHEUMA	Rheumatoid arthritis || id:finngen_R11_M13_RHEUMA	CD48++CD48_NA_CD48	Weighted median	4	-0.0893652	0.0495458	0.0712798	-0.186475	0.00774447	0.914512	0.829879	1.00777	0.605312
CD48	finngen_R11_M13_RHEUMA	Rheumatoid arthritis || id:finngen_R11_M13_RHEUMA	CD48++CD48_NA_CD48	Weighted mode	4	-0.0923623	0.0507007	0.166036	-0.191736	0.00701104	0.911775	0.825525	1.00704	0.976532
CD48	finngen_R11_M13_RHEUMA	Rheumatoid arthritis || id:finngen_R11_M13_RHEUMA	CD48++CD48_NA_CD48	Maximum likelihood	4	-0.0897181	0.045023	0.0462926	-0.177963	-0.00147296	0.914189	0.836973	0.998528	0.502451
CD48	finngen_R11_M13_RHEUMA	Rheumatoid arthritis || id:finngen_R11_M13_RHEUMA	CD48++CD48_NA_CD48	Simple mode	4	-0.0766835	0.0659022	0.328722	-0.205852	0.0524848	0.926183	0.813954	1.05389	0.994896
CD5L	finngen_R11_M13_RHEUMA	Rheumatoid arthritis || id:finngen_R11_M13_RHEUMA	CD5L++CD5L_NA_CD5L	Inverse variance weighted	5	-0.0672797	0.0385733	0.0811232	-0.142883	0.00832389	0.934934	0.866855	1.00836	0.760764
CD5L	finngen_R11_M13_RHEUMA	Rheumatoid arthritis || id:finngen_R11_M13_RHEUMA	CD5L++CD5L_NA_CD5L	MR Egger	5	-0.150631	0.0994287	0.227021	-0.345512	0.0442488	0.860165	0.707858	1.04524	0.999671
CD5L	finngen_R11_M13_RHEUMA	Rheumatoid arthritis || id:finngen_R11_M13_RHEUMA	CD5L++CD5L_NA_CD5L	Weighted median	5	-0.0772394	0.0405077	0.0565487	-0.156635	0.00215571	0.925668	0.855016	1.00216	0.577341
CD5L	finngen_R11_M13_RHEUMA	Rheumatoid arthritis || id:finngen_R11_M13_RHEUMA	CD5L++CD5L_NA_CD5L	Weighted mode	5	-0.0818806	0.0412186	0.117922	-0.162669	-0.00109222	0.921382	0.849872	0.998908	0.976532
CD5L	finngen_R11_M13_RHEUMA	Rheumatoid arthritis || id:finngen_R11_M13_RHEUMA	CD5L++CD5L_NA_CD5L	Maximum likelihood	5	-0.0673498	0.038626	0.0812222	-0.143057	0.00835718	0.934868	0.866705	1.00839	0.57898
CD5L	finngen_R11_M13_RHEUMA	Rheumatoid arthritis || id:finngen_R11_M13_RHEUMA	CD5L++CD5L_NA_CD5L	Simple mode	5	-0.0660249	0.117587	0.604426	-0.296495	0.164446	0.936108	0.743419	1.17874	0.994896
CNTN4	finngen_R11_M13_RHEUMA	Rheumatoid arthritis || id:finngen_R11_M13_RHEUMA	CNTN4++Contactin_4	Inverse variance weighted	8	-0.0354929	0.0323074	0.271941	-0.0988154	0.0278295	0.96513	0.90591	1.02822	0.982649
CNTN4	finngen_R11_M13_RHEUMA	Rheumatoid arthritis || id:finngen_R11_M13_RHEUMA	CNTN4++Contactin_4	MR Egger	8	-0.00587408	0.0668893	0.932879	-0.136977	0.125229	0.994143	0.87199	1.13341	0.999671
CNTN4	finngen_R11_M13_RHEUMA	Rheumatoid arthritis || id:finngen_R11_M13_RHEUMA	CNTN4++Contactin_4	Weighted median	8	-0.0426192	0.0409835	0.298381	-0.122947	0.0377084	0.958276	0.884311	1.03843	0.88365
CNTN4	finngen_R11_M13_RHEUMA	Rheumatoid arthritis || id:finngen_R11_M13_RHEUMA	CNTN4++Contactin_4	Weighted mode	8	-0.00676599	0.0430684	0.879602	-0.0911801	0.0776481	0.993257	0.912853	1.08074	0.984041
CNTN4	finngen_R11_M13_RHEUMA	Rheumatoid arthritis || id:finngen_R11_M13_RHEUMA	CNTN4++Contactin_4	Maximum likelihood	8	-0.0355709	0.0323582	0.271644	-0.098993	0.0278512	0.965054	0.905749	1.02824	0.822274
CNTN4	finngen_R11_M13_RHEUMA	Rheumatoid arthritis || id:finngen_R11_M13_RHEUMA	CNTN4++Contactin_4	Simple mode	8	-0.0651444	0.0624965	0.331897	-0.187638	0.0573488	0.936932	0.828915	1.05903	0.994896
CST7	finngen_R11_M13_RHEUMA	Rheumatoid arthritis || id:finngen_R11_M13_RHEUMA	CST7++CYTF_NA_CYTF	Inverse variance weighted	7	-0.00502238	0.0396386	0.899174	-0.082714	0.0726692	0.99499	0.920614	1.07537	0.992535
CST7	finngen_R11_M13_RHEUMA	Rheumatoid arthritis || id:finngen_R11_M13_RHEUMA	CST7++CYTF_NA_CYTF	MR Egger	7	-0.143374	0.0849991	0.152454	-0.309973	0.0232239	0.86643	0.733467	1.0235	0.999671
CST7	finngen_R11_M13_RHEUMA	Rheumatoid arthritis || id:finngen_R11_M13_RHEUMA	CST7++CYTF_NA_CYTF	Weighted median	7	-0.0146236	0.0300686	0.626726	-0.0735582	0.044311	0.985483	0.929082	1.04531	0.969453
CST7	finngen_R11_M13_RHEUMA	Rheumatoid arthritis || id:finngen_R11_M13_RHEUMA	CST7++CYTF_NA_CYTF	Weighted mode	7	-0.00781418	0.0313314	0.811367	-0.0692238	0.0535954	0.992216	0.933118	1.05506	0.984041
CST7	finngen_R11_M13_RHEUMA	Rheumatoid arthritis || id:finngen_R11_M13_RHEUMA	CST7++CYTF_NA_CYTF	Maximum likelihood	7	-0.00503595	0.0278205	0.856355	-0.0595641	0.0494922	0.994977	0.942175	1.05074	0.975865
CST7	finngen_R11_M13_RHEUMA	Rheumatoid arthritis || id:finngen_R11_M13_RHEUMA	CST7++CYTF_NA_CYTF	Simple mode	7	-0.0621644	0.0595168	0.336504	-0.178817	0.0544885	0.939728	0.836259	1.056	0.994896
DLL4	finngen_R11_M13_RHEUMA	Rheumatoid arthritis || id:finngen_R11_M13_RHEUMA	DLL4++DLL4_NA_DLL4	Wald ratio	1	0.580664	0.207293	0.00509159	0.174371	0.986958	1.78723	1.1905	2.68306	0.18022
FCGR3B	finngen_R11_M13_RHEUMA	Rheumatoid arthritis || id:finngen_R11_M13_RHEUMA	FCGR3B++FCG3B_NA_FCG3B	Inverse variance weighted	2	0.094179	0.0321737	0.00342026	0.0311185	0.15724	1.09876	1.03161	1.17028	0.24162
FCGR3B	finngen_R11_M13_RHEUMA	Rheumatoid arthritis || id:finngen_R11_M13_RHEUMA	FCGR3B++FCG3B_NA_FCG3B	Maximum likelihood	2	0.0942805	0.0322484	0.00346045	0.0310736	0.157487	1.09887	1.03156	1.17057	0.168268
FCN2	finngen_R11_M13_RHEUMA	Rheumatoid arthritis || id:finngen_R11_M13_RHEUMA	FCN2++FCN2_NA_FCN2	Inverse variance weighted	6	0.00639521	0.0263512	0.808245	-0.0452531	0.0580436	1.00642	0.955756	1.05976	0.992378
FCN2	finngen_R11_M13_RHEUMA	Rheumatoid arthritis || id:finngen_R11_M13_RHEUMA	FCN2++FCN2_NA_FCN2	MR Egger	6	0.0417175	0.0428136	0.385034	-0.0421972	0.125632	1.0426	0.958681	1.13387	0.999671
FCN2	finngen_R11_M13_RHEUMA	Rheumatoid arthritis || id:finngen_R11_M13_RHEUMA	FCN2++FCN2_NA_FCN2	Weighted median	6	0.00846166	0.0271139	0.754981	-0.0446817	0.061605	1.0085	0.956302	1.06354	0.982685
FCN2	finngen_R11_M13_RHEUMA	Rheumatoid arthritis || id:finngen_R11_M13_RHEUMA	FCN2++FCN2_NA_FCN2	Weighted mode	6	0.0103205	0.0281344	0.728759	-0.0448229	0.0654639	1.01037	0.956167	1.06765	0.983092
FCN2	finngen_R11_M13_RHEUMA	Rheumatoid arthritis || id:finngen_R11_M13_RHEUMA	FCN2++FCN2_NA_FCN2	Maximum likelihood	6	0.00640668	0.0263612	0.807979	-0.0452613	0.0580746	1.00643	0.955748	1.05979	0.973773
FCN2	finngen_R11_M13_RHEUMA	Rheumatoid arthritis || id:finngen_R11_M13_RHEUMA	FCN2++FCN2_NA_FCN2	Simple mode	6	0.103402	0.072259	0.211841	-0.0382253	0.24503	1.10894	0.962496	1.27766	0.994896
GFRA1	finngen_R11_M13_RHEUMA	Rheumatoid arthritis || id:finngen_R11_M13_RHEUMA	GFRA1++GFRa_1	Wald ratio	1	0.0621122	0.0689894	0.367952	-0.073107	0.197331	1.06408	0.929501	1.21815	0.777232
LRIG3	finngen_R11_M13_RHEUMA	Rheumatoid arthritis || id:finngen_R11_M13_RHEUMA	LRIG3++LRIG3_NA_LRIG3	Inverse variance weighted	7	0.0329942	0.0407284	0.417881	-0.0468335	0.112822	1.03354	0.954246	1.11943	0.990373
LRIG3	finngen_R11_M13_RHEUMA	Rheumatoid arthritis || id:finngen_R11_M13_RHEUMA	LRIG3++LRIG3_NA_LRIG3	MR Egger	7	0.0847229	0.0652636	0.250883	-0.0431938	0.21264	1.08842	0.957726	1.23694	0.999671
LRIG3	finngen_R11_M13_RHEUMA	Rheumatoid arthritis || id:finngen_R11_M13_RHEUMA	LRIG3++LRIG3_NA_LRIG3	Weighted median	7	0.0381136	0.0518867	0.462611	-0.0635844	0.139812	1.03885	0.938395	1.15006	0.907615
LRIG3	finngen_R11_M13_RHEUMA	Rheumatoid arthritis || id:finngen_R11_M13_RHEUMA	LRIG3++LRIG3_NA_LRIG3	Weighted mode	7	0.00498249	0.0612863	0.937849	-0.115139	0.125104	1.00499	0.891243	1.13327	0.984041
LRIG3	finngen_R11_M13_RHEUMA	Rheumatoid arthritis || id:finngen_R11_M13_RHEUMA	LRIG3++LRIG3_NA_LRIG3	Maximum likelihood	7	0.0330892	0.0373202	0.375279	-0.0400584	0.106237	1.03364	0.960733	1.11209	0.884867
LRIG3	finngen_R11_M13_RHEUMA	Rheumatoid arthritis || id:finngen_R11_M13_RHEUMA	LRIG3++LRIG3_NA_LRIG3	Simple mode	7	0.0277705	0.0903037	0.76884	-0.149225	0.204766	1.02816	0.861376	1.22724	0.994896
LRP8	finngen_R11_M13_RHEUMA	Rheumatoid arthritis || id:finngen_R11_M13_RHEUMA	LRP8++LRP8_NA_LRP8	Inverse variance weighted	2	0.0523826	0.0648996	0.41959	-0.0748206	0.179586	1.05378	0.92791	1.19672	0.990373
LRP8	finngen_R11_M13_RHEUMA	Rheumatoid arthritis || id:finngen_R11_M13_RHEUMA	LRP8++LRP8_NA_LRP8	Maximum likelihood	2	0.052432	0.0649696	0.419653	-0.0749085	0.179772	1.05383	0.927828	1.19694	0.890655
LY9	finngen_R11_M13_RHEUMA	Rheumatoid arthritis || id:finngen_R11_M13_RHEUMA	LY9++LY9_NA_LY9	Inverse variance weighted	7	0.0111389	0.0258986	0.667127	-0.0396224	0.0619001	1.0112	0.961152	1.06386	0.990373
LY9	finngen_R11_M13_RHEUMA	Rheumatoid arthritis || id:finngen_R11_M13_RHEUMA	LY9++LY9_NA_LY9	MR Egger	7	0.00913068	0.0400414	0.828654	-0.0693505	0.0876119	1.00917	0.933	1.09156	0.999671
LY9	finngen_R11_M13_RHEUMA	Rheumatoid arthritis || id:finngen_R11_M13_RHEUMA	LY9++LY9_NA_LY9	Weighted median	7	0.0102957	0.0273018	0.706094	-0.0432158	0.0638071	1.01035	0.957705	1.06589	0.97421
LY9	finngen_R11_M13_RHEUMA	Rheumatoid arthritis || id:finngen_R11_M13_RHEUMA	LY9++LY9_NA_LY9	Weighted mode	7	0.0123484	0.0268235	0.661473	-0.0402256	0.0649223	1.01242	0.960573	1.06708	0.9821
LY9	finngen_R11_M13_RHEUMA	Rheumatoid arthritis || id:finngen_R11_M13_RHEUMA	LY9++LY9_NA_LY9	Maximum likelihood	7	0.0111332	0.0259169	0.667506	-0.0396639	0.0619304	1.0112	0.961112	1.06389	0.93286
LY9	finngen_R11_M13_RHEUMA	Rheumatoid arthritis || id:finngen_R11_M13_RHEUMA	LY9++LY9_NA_LY9	Simple mode	7	0.112535	0.0748314	0.183318	-0.0341347	0.259204	1.11911	0.966441	1.2959	0.994896
MATN2	finngen_R11_M13_RHEUMA	Rheumatoid arthritis || id:finngen_R11_M13_RHEUMA	MATN2++MATN2_NA_MATN2	Inverse variance weighted	4	-0.0633811	0.0687059	0.356269	-0.198045	0.0712824	0.938586	0.820333	1.07388	0.990373
MATN2	finngen_R11_M13_RHEUMA	Rheumatoid arthritis || id:finngen_R11_M13_RHEUMA	MATN2++MATN2_NA_MATN2	MR Egger	4	-0.266706	0.201252	0.316222	-0.661161	0.127749	0.765898	0.516252	1.13627	0.999671
MATN2	finngen_R11_M13_RHEUMA	Rheumatoid arthritis || id:finngen_R11_M13_RHEUMA	MATN2++MATN2_NA_MATN2	Weighted median	4	-0.107901	0.0788026	0.17092	-0.262354	0.0465522	0.897717	0.769239	1.04765	0.834332
MATN2	finngen_R11_M13_RHEUMA	Rheumatoid arthritis || id:finngen_R11_M13_RHEUMA	MATN2++MATN2_NA_MATN2	Weighted mode	4	-0.11078	0.106869	0.376143	-0.320243	0.0986825	0.895135	0.725973	1.10372	0.976532
MATN2	finngen_R11_M13_RHEUMA	Rheumatoid arthritis || id:finngen_R11_M13_RHEUMA	MATN2++MATN2_NA_MATN2	Maximum likelihood	4	-0.0636762	0.0689	0.355391	-0.19872	0.0713678	0.938309	0.819779	1.07398	0.870981
MATN2	finngen_R11_M13_RHEUMA	Rheumatoid arthritis || id:finngen_R11_M13_RHEUMA	MATN2++MATN2_NA_MATN2	Simple mode	4	-0.128518	0.113033	0.338136	-0.350062	0.0930256	0.879397	0.704644	1.09749	0.994896
CADM1	finngen_R11_M13_RHEUMA	Rheumatoid arthritis || id:finngen_R11_M13_RHEUMA	CADM1++Nectin_like_protein_2	Wald ratio	1	0.104893	0.091443	0.251348	-0.0743357	0.284121	1.11059	0.92836	1.32859	0.722927
RGMB	finngen_R11_M13_RHEUMA	Rheumatoid arthritis || id:finngen_R11_M13_RHEUMA	RGMB++RGMB_NA_RGMB	Inverse variance weighted	3	0.148856	0.0717561	0.0380354	0.00821416	0.289498	1.16051	1.00825	1.33576	0.658603
RGMB	finngen_R11_M13_RHEUMA	Rheumatoid arthritis || id:finngen_R11_M13_RHEUMA	RGMB++RGMB_NA_RGMB	MR Egger	3	0.0798529	0.359224	0.860748	-0.624227	0.783932	1.08313	0.535676	2.19007	0.999671
RGMB	finngen_R11_M13_RHEUMA	Rheumatoid arthritis || id:finngen_R11_M13_RHEUMA	RGMB++RGMB_NA_RGMB	Weighted median	3	0.142168	0.0756668	0.0602626	-0.00613906	0.290475	1.15277	0.99388	1.33706	0.577341
RGMB	finngen_R11_M13_RHEUMA	Rheumatoid arthritis || id:finngen_R11_M13_RHEUMA	RGMB++RGMB_NA_RGMB	Weighted mode	3	0.132068	0.094981	0.298905	-0.0540948	0.318231	1.14119	0.947342	1.37469	0.976532
RGMB	finngen_R11_M13_RHEUMA	Rheumatoid arthritis || id:finngen_R11_M13_RHEUMA	RGMB++RGMB_NA_RGMB	Maximum likelihood	3	0.149527	0.0722224	0.0384175	0.00797133	0.291083	1.16129	1.008	1.33788	0.472831
RGMB	finngen_R11_M13_RHEUMA	Rheumatoid arthritis || id:finngen_R11_M13_RHEUMA	RGMB++RGMB_NA_RGMB	Simple mode	3	0.0943389	0.110928	0.484649	-0.123081	0.311758	1.09893	0.884192	1.36582	0.994896
TFPI	finngen_R11_M13_RHEUMA	Rheumatoid arthritis || id:finngen_R11_M13_RHEUMA	TFPI++TFPI_NA_TFPI	Wald ratio	1	-0.263269	0.299021	0.378623	-0.84935	0.322812	0.768535	0.427693	1.38101	0.783932
THBS4	finngen_R11_M13_RHEUMA	Rheumatoid arthritis || id:finngen_R11_M13_RHEUMA	THBS4++TSP4_NA_TSP4	Inverse variance weighted	3	0.00962554	0.049925	0.847116	-0.0882274	0.107479	1.00967	0.915553	1.11347	0.992378
THBS4	finngen_R11_M13_RHEUMA	Rheumatoid arthritis || id:finngen_R11_M13_RHEUMA	THBS4++TSP4_NA_TSP4	MR Egger	3	0.0254165	0.08589	0.816839	-0.142928	0.193761	1.02574	0.866816	1.21381	0.999671
THBS4	finngen_R11_M13_RHEUMA	Rheumatoid arthritis || id:finngen_R11_M13_RHEUMA	THBS4++TSP4_NA_TSP4	Weighted median	3	0.0207703	0.0521947	0.690675	-0.0815313	0.123072	1.02099	0.921704	1.13097	0.97421
THBS4	finngen_R11_M13_RHEUMA	Rheumatoid arthritis || id:finngen_R11_M13_RHEUMA	THBS4++TSP4_NA_TSP4	Weighted mode	3	0.020986	0.0537707	0.733971	-0.0844046	0.126377	1.02121	0.919059	1.13471	0.983092
THBS4	finngen_R11_M13_RHEUMA	Rheumatoid arthritis || id:finngen_R11_M13_RHEUMA	THBS4++TSP4_NA_TSP4	Maximum likelihood	3	0.00963088	0.0499367	0.847067	-0.088245	0.107507	1.00968	0.915536	1.1135	0.975865
THBS4	finngen_R11_M13_RHEUMA	Rheumatoid arthritis || id:finngen_R11_M13_RHEUMA	THBS4++TSP4_NA_TSP4	Simple mode	3	0.0227598	0.073282	0.7855	-0.120873	0.166393	1.02302	0.886147	1.18104	0.994896
ACY1	finngen_R11_M13_RHEUMA	Rheumatoid arthritis || id:finngen_R11_M13_RHEUMA	ACY1++Aminoacylase_1	Inverse variance weighted	2	-0.000130966	0.184316	0.999433	-0.361391	0.361129	0.999869	0.696707	1.43495	0.999726
ACY1	finngen_R11_M13_RHEUMA	Rheumatoid arthritis || id:finngen_R11_M13_RHEUMA	ACY1++Aminoacylase_1	Maximum likelihood	2	-0.000134926	0.0900461	0.998804	-0.176625	0.176355	0.999865	0.838094	1.19286	0.99969
SERPINC1	finngen_R11_M13_RHEUMA	Rheumatoid arthritis || id:finngen_R11_M13_RHEUMA	SERPINC1++Antithrombin_III	Wald ratio	1	-0.129257	0.211413	0.54094	-0.543627	0.285114	0.878748	0.580638	1.32991	0.873359
BMP1	finngen_R11_M13_RHEUMA	Rheumatoid arthritis || id:finngen_R11_M13_RHEUMA	BMP1++BMP_1	Wald ratio	1	0.19742	0.163436	0.227073	-0.122915	0.517755	1.21826	0.884339	1.67826	0.722258
CSK	finngen_R11_M13_RHEUMA	Rheumatoid arthritis || id:finngen_R11_M13_RHEUMA	CSK++CSK_NA_CSK	Wald ratio	1	0.400416	0.191301	0.0363388	0.0254653	0.775367	1.49245	1.02579	2.17139	0.381769
FETUB	finngen_R11_M13_RHEUMA	Rheumatoid arthritis || id:finngen_R11_M13_RHEUMA	FETUB++FETUB_NA_FETUB	Inverse variance weighted	7	-0.0864711	0.0573747	0.131778	-0.198926	0.0259835	0.917162	0.819611	1.02632	0.838508
FETUB	finngen_R11_M13_RHEUMA	Rheumatoid arthritis || id:finngen_R11_M13_RHEUMA	FETUB++FETUB_NA_FETUB	MR Egger	7	-0.0623339	0.0784648	0.462973	-0.216125	0.091457	0.939569	0.805635	1.09577	0.999671
FETUB	finngen_R11_M13_RHEUMA	Rheumatoid arthritis || id:finngen_R11_M13_RHEUMA	FETUB++FETUB_NA_FETUB	Weighted median	7	-0.0969251	0.0685972	0.157667	-0.231376	0.0375254	0.907624	0.793441	1.03824	0.814013
FETUB	finngen_R11_M13_RHEUMA	Rheumatoid arthritis || id:finngen_R11_M13_RHEUMA	FETUB++FETUB_NA_FETUB	Weighted mode	7	-0.102808	0.0681879	0.182352	-0.236457	0.03084	0.9023	0.78942	1.03132	0.976532
FETUB	finngen_R11_M13_RHEUMA	Rheumatoid arthritis || id:finngen_R11_M13_RHEUMA	FETUB++FETUB_NA_FETUB	Maximum likelihood	7	-0.0865742	0.0574537	0.131849	-0.199183	0.026035	0.917068	0.8194	1.02638	0.663866
FETUB	finngen_R11_M13_RHEUMA	Rheumatoid arthritis || id:finngen_R11_M13_RHEUMA	FETUB++FETUB_NA_FETUB	Simple mode	7	-0.110485	0.11112	0.358474	-0.32828	0.10731	0.8954	0.720161	1.11328	0.994896
KLK7	finngen_R11_M13_RHEUMA	Rheumatoid arthritis || id:finngen_R11_M13_RHEUMA	KLK7++Kallikrein_7	Inverse variance weighted	2	-0.0234631	0.0713078	0.742125	-0.163226	0.1163	0.97681	0.849399	1.12333	0.990373
KLK7	finngen_R11_M13_RHEUMA	Rheumatoid arthritis || id:finngen_R11_M13_RHEUMA	KLK7++Kallikrein_7	Maximum likelihood	2	-0.0234928	0.0372414	0.528154	-0.096486	0.0495003	0.976781	0.908023	1.05075	0.916391
SERPINA5	finngen_R11_M13_RHEUMA	Rheumatoid arthritis || id:finngen_R11_M13_RHEUMA	SERPINA5++PCI_NA_PCI	Inverse variance weighted	2	0.0381899	0.0490353	0.436083	-0.0579194	0.134299	1.03893	0.943726	1.14373	0.990373
SERPINA5	finngen_R11_M13_RHEUMA	Rheumatoid arthritis || id:finngen_R11_M13_RHEUMA	SERPINA5++PCI_NA_PCI	Maximum likelihood	2	0.0381955	0.0490553	0.436203	-0.057953	0.134344	1.03893	0.943694	1.14379	0.894507
PIK3CG	finngen_R11_M13_RHEUMA	Rheumatoid arthritis || id:finngen_R11_M13_RHEUMA	PIK3CG++PK3CG_NA_PK3CG	Wald ratio	1	0.182381	0.253221	0.471375	-0.313932	0.678694	1.20007	0.730568	1.9713	0.853181
REN	finngen_R11_M13_RHEUMA	Rheumatoid arthritis || id:finngen_R11_M13_RHEUMA	REN++Renin_NA_Renin	Inverse variance weighted	5	0.0568647	0.0793181	0.473424	-0.0985987	0.212328	1.05851	0.906106	1.23655	0.990373
REN	finngen_R11_M13_RHEUMA	Rheumatoid arthritis || id:finngen_R11_M13_RHEUMA	REN++Renin_NA_Renin	MR Egger	5	0.119822	0.11165	0.361833	-0.099013	0.338656	1.1273	0.905731	1.40306	0.999671
REN	finngen_R11_M13_RHEUMA	Rheumatoid arthritis || id:finngen_R11_M13_RHEUMA	REN++Renin_NA_Renin	Weighted median	5	0.0727589	0.088162	0.409209	-0.100039	0.245556	1.07547	0.904802	1.27833	0.88643
REN	finngen_R11_M13_RHEUMA	Rheumatoid arthritis || id:finngen_R11_M13_RHEUMA	REN++Renin_NA_Renin	Weighted mode	5	0.0736514	0.0981744	0.494846	-0.11877	0.266073	1.07643	0.888012	1.30483	0.976532
REN	finngen_R11_M13_RHEUMA	Rheumatoid arthritis || id:finngen_R11_M13_RHEUMA	REN++Renin_NA_Renin	Maximum likelihood	5	0.0570493	0.0795334	0.473189	-0.0988361	0.212935	1.05871	0.905891	1.2373	0.9072
REN	finngen_R11_M13_RHEUMA	Rheumatoid arthritis || id:finngen_R11_M13_RHEUMA	REN++Renin_NA_Renin	Simple mode	5	0.0576495	0.127896	0.67552	-0.193026	0.308325	1.05934	0.824461	1.36114	0.994896
IBSP	finngen_R11_M13_RHEUMA	Rheumatoid arthritis || id:finngen_R11_M13_RHEUMA	IBSP++BSP_NA_BSP	Wald ratio	1	-0.0269091	0.129928	0.835926	-0.281568	0.22775	0.97345	0.7546	1.25577	0.944479
CAMK2D	finngen_R11_M13_RHEUMA	Rheumatoid arthritis || id:finngen_R11_M13_RHEUMA	CAMK2D++CAMK2D_NA_CAMK2D	Wald ratio	1	0.0752897	0.282494	0.78984	-0.478399	0.628979	1.0782	0.619775	1.87569	0.94274
CA13	finngen_R11_M13_RHEUMA	Rheumatoid arthritis || id:finngen_R11_M13_RHEUMA	CA13++Carbonic_anhydrase_XIII	Wald ratio	1	0.0536049	0.0508408	0.291714	-0.046043	0.153253	1.05507	0.955001	1.16562	0.748778
TNFSF8	finngen_R11_M13_RHEUMA	Rheumatoid arthritis || id:finngen_R11_M13_RHEUMA	TNFSF8++CD30_Ligand	Inverse variance weighted	2	-0.0479279	0.0848255	0.572061	-0.214186	0.11833	0.953202	0.807198	1.12562	0.990373
TNFSF8	finngen_R11_M13_RHEUMA	Rheumatoid arthritis || id:finngen_R11_M13_RHEUMA	TNFSF8++CD30_Ligand	Maximum likelihood	2	-0.047933	0.0848726	0.572234	-0.214283	0.118417	0.953198	0.80712	1.12571	0.924823
FN1	finngen_R11_M13_RHEUMA	Rheumatoid arthritis || id:finngen_R11_M13_RHEUMA	FN1++FN1_3	Wald ratio	1	0.0416921	0.0955223	0.662499	-0.145532	0.228916	1.04257	0.864563	1.25724	0.91523
FN1	finngen_R11_M13_RHEUMA	Rheumatoid arthritis || id:finngen_R11_M13_RHEUMA	FN1++FN1_4	Wald ratio	1	-0.0407243	0.0968089	0.673999	-0.23047	0.149021	0.960094	0.79416	1.1607	0.917891
FSTL3	finngen_R11_M13_RHEUMA	Rheumatoid arthritis || id:finngen_R11_M13_RHEUMA	FSTL3++FSTL3_NA_FSTL3	Inverse variance weighted	2	0.0857161	0.104966	0.414152	-0.120017	0.29145	1.0895	0.886905	1.33837	0.990373
FSTL3	finngen_R11_M13_RHEUMA	Rheumatoid arthritis || id:finngen_R11_M13_RHEUMA	FSTL3++FSTL3_NA_FSTL3	Maximum likelihood	2	0.0857437	0.105304	0.415501	-0.120652	0.292139	1.08953	0.886343	1.33929	0.890655
GZMA	finngen_R11_M13_RHEUMA	Rheumatoid arthritis || id:finngen_R11_M13_RHEUMA	GZMA++granzyme_A	Inverse variance weighted	5	-0.00866871	0.0686928	0.899577	-0.143307	0.125969	0.991369	0.866488	1.13425	0.992535
GZMA	finngen_R11_M13_RHEUMA	Rheumatoid arthritis || id:finngen_R11_M13_RHEUMA	GZMA++granzyme_A	MR Egger	5	-0.0360996	0.111845	0.76806	-0.255315	0.183116	0.964544	0.774673	1.20095	0.999671
GZMA	finngen_R11_M13_RHEUMA	Rheumatoid arthritis || id:finngen_R11_M13_RHEUMA	GZMA++granzyme_A	Weighted median	5	-0.0260538	0.0807907	0.747085	-0.184404	0.132296	0.974283	0.8316	1.14145	0.982685
GZMA	finngen_R11_M13_RHEUMA	Rheumatoid arthritis || id:finngen_R11_M13_RHEUMA	GZMA++granzyme_A	Weighted mode	5	-0.0239242	0.0980491	0.819233	-0.2161	0.168252	0.97636	0.805654	1.18323	0.984041
GZMA	finngen_R11_M13_RHEUMA	Rheumatoid arthritis || id:finngen_R11_M13_RHEUMA	GZMA++granzyme_A	Maximum likelihood	5	-0.00870456	0.0667394	0.896229	-0.139514	0.122105	0.991333	0.869781	1.12987	0.978043
GZMA	finngen_R11_M13_RHEUMA	Rheumatoid arthritis || id:finngen_R11_M13_RHEUMA	GZMA++granzyme_A	Simple mode	5	-0.0404344	0.11318	0.73895	-0.262267	0.181398	0.960372	0.769306	1.19889	0.994896
IL15RA	finngen_R11_M13_RHEUMA	Rheumatoid arthritis || id:finngen_R11_M13_RHEUMA	IL15RA++IL_15_Ra_3445	Wald ratio	1	-0.366869	0.241036	0.127998	-0.8393	0.105563	0.692901	0.432013	1.11134	0.581957
CXCL8	finngen_R11_M13_RHEUMA	Rheumatoid arthritis || id:finngen_R11_M13_RHEUMA	CXCL8++IL_8	Wald ratio	1	0.500552	0.335396	0.135589	-0.156824	1.15793	1.64963	0.854854	3.18333	0.604185
INSR	finngen_R11_M13_RHEUMA	Rheumatoid arthritis || id:finngen_R11_M13_RHEUMA	INSR++IR_NA_IR	Wald ratio	1	-0.0399656	0.190203	0.833573	-0.412763	0.332832	0.960822	0.661819	1.39491	0.944479
SERPINA4	finngen_R11_M13_RHEUMA	Rheumatoid arthritis || id:finngen_R11_M13_RHEUMA	SERPINA4++Kallistatin_NA_Kallistatin	Inverse variance weighted	6	-0.0153296	0.0313227	0.624554	-0.0767221	0.0460629	0.984787	0.926147	1.04714	0.990373
SERPINA4	finngen_R11_M13_RHEUMA	Rheumatoid arthritis || id:finngen_R11_M13_RHEUMA	SERPINA4++Kallistatin_NA_Kallistatin	MR Egger	6	-0.0261254	0.0636426	0.702475	-0.150865	0.0986141	0.974213	0.859964	1.10364	0.999671
SERPINA4	finngen_R11_M13_RHEUMA	Rheumatoid arthritis || id:finngen_R11_M13_RHEUMA	SERPINA4++Kallistatin_NA_Kallistatin	Weighted median	6	-0.0148061	0.0325851	0.649554	-0.0786728	0.0490607	0.985303	0.924342	1.05028	0.969453
SERPINA4	finngen_R11_M13_RHEUMA	Rheumatoid arthritis || id:finngen_R11_M13_RHEUMA	SERPINA4++Kallistatin_NA_Kallistatin	Weighted mode	6	-0.0137722	0.0337001	0.699696	-0.0798243	0.0522799	0.986322	0.923279	1.05367	0.9821
SERPINA4	finngen_R11_M13_RHEUMA	Rheumatoid arthritis || id:finngen_R11_M13_RHEUMA	SERPINA4++Kallistatin_NA_Kallistatin	Maximum likelihood	6	-0.0153465	0.0313401	0.624364	-0.0767732	0.0460802	0.984771	0.9261	1.04716	0.929849
SERPINA4	finngen_R11_M13_RHEUMA	Rheumatoid arthritis || id:finngen_R11_M13_RHEUMA	SERPINA4++Kallistatin_NA_Kallistatin	Simple mode	6	-0.0323778	0.0713367	0.668942	-0.172198	0.107442	0.968141	0.841813	1.11343	0.994896
POSTN	finngen_R11_M13_RHEUMA	Rheumatoid arthritis || id:finngen_R11_M13_RHEUMA	POSTN++Periostin_NA_Periostin	Inverse variance weighted	4	0.0154452	0.0502898	0.758749	-0.0831228	0.114013	1.01557	0.920238	1.12077	0.990373
POSTN	finngen_R11_M13_RHEUMA	Rheumatoid arthritis || id:finngen_R11_M13_RHEUMA	POSTN++Periostin_NA_Periostin	MR Egger	4	0.196285	0.150034	0.320922	-0.0977805	0.490351	1.21687	0.906848	1.63289	0.999671
POSTN	finngen_R11_M13_RHEUMA	Rheumatoid arthritis || id:finngen_R11_M13_RHEUMA	POSTN++Periostin_NA_Periostin	Weighted median	4	0.0396354	0.0554438	0.474686	-0.0690345	0.148305	1.04043	0.933295	1.15987	0.907615
POSTN	finngen_R11_M13_RHEUMA	Rheumatoid arthritis || id:finngen_R11_M13_RHEUMA	POSTN++Periostin_NA_Periostin	Weighted mode	4	0.0423305	0.0631045	0.550373	-0.0813543	0.166015	1.04324	0.921867	1.18059	0.976532
POSTN	finngen_R11_M13_RHEUMA	Rheumatoid arthritis || id:finngen_R11_M13_RHEUMA	POSTN++Periostin_NA_Periostin	Maximum likelihood	4	0.0154759	0.0503422	0.758528	-0.0831947	0.114147	1.0156	0.920172	1.12092	0.95774
POSTN	finngen_R11_M13_RHEUMA	Rheumatoid arthritis || id:finngen_R11_M13_RHEUMA	POSTN++Periostin_NA_Periostin	Simple mode	4	0.0336057	0.0812998	0.707117	-0.125742	0.192953	1.03418	0.881842	1.21283	0.994896
BCAN	finngen_R11_M13_RHEUMA	Rheumatoid arthritis || id:finngen_R11_M13_RHEUMA	BCAN++PGCB_NA_PGCB	Inverse variance weighted	2	-0.0342381	0.0638485	0.591793	-0.159381	0.0909049	0.966341	0.852671	1.09516	0.990373
BCAN	finngen_R11_M13_RHEUMA	Rheumatoid arthritis || id:finngen_R11_M13_RHEUMA	BCAN++PGCB_NA_PGCB	Maximum likelihood	2	-0.0342381	0.0638638	0.591882	-0.159411	0.0909349	0.966341	0.852646	1.0952	0.925963
SELE	finngen_R11_M13_RHEUMA	Rheumatoid arthritis || id:finngen_R11_M13_RHEUMA	SELE++sE_Selectin	Wald ratio	1	0.274306	0.11284	0.0150599	0.0531401	0.495472	1.31562	1.05458	1.64127	0.225084
THBS1	finngen_R11_M13_RHEUMA	Rheumatoid arthritis || id:finngen_R11_M13_RHEUMA	THBS1++Thrombospondin_1	Wald ratio	1	-0.730614	0.291077	0.0120719	-1.30112	-0.160103	0.481613	0.272226	0.852056	0.210117
XPNPEP1	finngen_R11_M13_RHEUMA	Rheumatoid arthritis || id:finngen_R11_M13_RHEUMA	XPNPEP1++XPNPEP1_NA_XPNPEP1	Wald ratio	1	-0.0405962	0.205041	0.843052	-0.442476	0.361283	0.960217	0.642444	1.43517	0.946505
AGT	finngen_R11_M13_RHEUMA	Rheumatoid arthritis || id:finngen_R11_M13_RHEUMA	AGT++Angiotensinogen_NA_Angiotensinogen	Inverse variance weighted	2	-0.0458182	0.0678226	0.49932	-0.17875	0.0871141	0.955216	0.836315	1.09102	0.990373
AGT	finngen_R11_M13_RHEUMA	Rheumatoid arthritis || id:finngen_R11_M13_RHEUMA	AGT++Angiotensinogen_NA_Angiotensinogen	Maximum likelihood	2	-0.0458191	0.0678584	0.499538	-0.178822	0.0871833	0.955215	0.836255	1.0911	0.9072
[truncated: 5,299 more rows]

## Sheet: S2
Table S2. Results of Mendelian randomization analysis on plasma proteins and seropositive rheumatoid arthritis
[truncated: 7,394 more rows]

## Sheet: S3
Table S3. Results of Mendelian randomization analysis on plasma proteins and seronegative rheumatoid arthritis
[truncated: 7,309 more rows]

[truncated: 17 more sheets: S4, S5, S6, S7, S8, S9, S10, S11, S12, S13, S14, S15, S16, S17, S18, S19, S20]
